# Supplementary material for: Strengthening Inclusive Local Participation Through Decentralized Party Organization: Insights from Peoples Democratic Party (PDP) And All Progressive Congress (APC), 2015 –2023
Source: Preprints.org preprint supplement (doi:10.20944/preprints202410.1318.v1), 2024-10-17
Supplement: Supplementary file 1 [file supplementary]

## Sheet: Form Responses 2
Timestamp	1.Select Your Age bracket	2.Gender	3.Educational Attainment	4.Geopolitical Zone	5.State of Origin	6.Local Government Origin	7.Electoral Ward	8.Are you a member of a political party?	9.What is your party affiliation?	10. For how long have you been a member the party?	11. Have you ever changed your party membership?	12. If your answer to question 11 above is yes, please state the political party you changed from	13.Why did you change/defect?	14.Are you holding any party position currently or held any party position before: :	15.What was/is your position in the party (Note: If answer to the previous question is NO please ignore)	16.Have you been elected into any public office/position?	17.What is the position? (Note: If answer to the previous question is NO please ignore)	18.As a party man, have you ever been appointed to a public position?	19.What is/was the position?	How does decentralized organizational structure impact on the membership stability of your Party? Where: Strongly Agree (SA), Agree (A), Neutral (N), Disagree (D) and Strongly Disagree (SD) [1. My party has structures at the national, zonal, state, local and ward levels]	How does decentralized organizational structure impact on the membership stability of your Party? Where: Strongly Agree (SA), Agree (A), Neutral (N), Disagree (D) and Strongly Disagree (SD) [2. In my party, power is distributed among national, state and local party Branches.]	How does decentralized organizational structure impact on the membership stability of your Party? Where: Strongly Agree (SA), Agree (A), Neutral (N), Disagree (D) and Strongly Disagree (SD) [3. The Chapters/Branches effectively perform responsibilities assigned to them by the party constitution]	How does decentralized organizational structure impact on the membership stability of your Party? Where: Strongly Agree (SA), Agree (A), Neutral (N), Disagree (D) and Strongly Disagree (SD) [4. Decentralized organizational structure could positively influence the recruitment and retention of members in a party]	How does decentralized organizational structure impact on the membership stability of your Party? Where: Strongly Agree (SA), Agree (A), Neutral (N), Disagree (D) and Strongly Disagree (SD) [ 5. Commitment of party members is enhanced when they participate in decision-making process of the party]	How does decentralized organizational structure impact on the membership stability of your Party? Where: Strongly Agree (SA), Agree (A), Neutral (N), Disagree (D) and Strongly Disagree (SD) [6. My party allows individual members opinion in reaching decisions]	How does decentralized organizational structure impact on the membership stability of your Party? Where: Strongly Agree (SA), Agree (A), Neutral (N), Disagree (D) and Strongly Disagree (SD) [7. I have always paid my monthly dues.]	How does decentralized organizational structure impact on the membership stability of your Party? Where: Strongly Agree (SA), Agree (A), Neutral (N), Disagree (D) and Strongly Disagree (SD) [8 . Party leaders sometimes pay dues for members]	How does decentralized organizational structure impact on the membership stability of your Party? Where: Strongly Agree (SA), Agree (A), Neutral (N), Disagree (D) and Strongly Disagree (SD) [9. Infact, party leaders finance the party activities and programmes]	How does decentralized organizational structure impact on the membership stability of your Party? Where: Strongly Agree (SA), Agree (A), Neutral (N), Disagree (D) and Strongly Disagree (SD) [10. Not taking part in decision making affects the sense of party ownership and commitment among members]	How does decentralized organizational structure impact on the membership stability of your Party? Where: Strongly Agree (SA), Agree (A), Neutral (N), Disagree (D) and Strongly Disagree (SD) [11. The centralized pattern of decision making in the party positively affects party membership stability]	How does decentralized organizational structure impact on the membership stability of your Party? Where: Strongly Agree (SA), Agree (A), Neutral (N), Disagree (D) and Strongly Disagree (SD) [12.Granting of more autonomy to local party chapters/branches could positively impact in their ability to retain members and foster loyalty]	Are there significant differences in the relationships between decentralized party organization and inclusive local participation in decision making in your Party? Where: Strongly Agree (SA), Agree (A), Neutral (N), Disagree (D) and Strongly Disagree (SD) [1. Strong national party leadership’s control hinders the level of local autonomy in decision-making processes of our party]	Are there significant differences in the relationships between decentralized party organization and inclusive local participation in decision making in your Party? Where: Strongly Agree (SA), Agree (A), Neutral (N), Disagree (D) and Strongly Disagree (SD) [2. All Chapters/Branches of our party have reliable sources of funding]	Are there significant differences in the relationships between decentralized party organization and inclusive local participation in decision making in your Party? Where: Strongly Agree (SA), Agree (A), Neutral (N), Disagree (D) and Strongly Disagree (SD) [3. The nature of power distribution amongst our party Chapters/Branches ensures the inclusion of diverse local viewpoints in decision-making]	Are there significant differences in the relationships between decentralized party organization and inclusive local participation in decision making in your Party? Where: Strongly Agree (SA), Agree (A), Neutral (N), Disagree (D) and Strongly Disagree (SD) [4. The pattern of decision made at the Chapters/Branches of our party influences national party decision]	Are there significant differences in the relationships between decentralized party organization and inclusive local participation in decision making in your Party? Where: Strongly Agree (SA), Agree (A), Neutral (N), Disagree (D) and Strongly Disagree (SD) [5. The current structure of my party encourages members from diverse background to participate in decision making process]	Are there significant differences in the relationships between decentralized party organization and inclusive local participation in decision making in your Party? Where: Strongly Agree (SA), Agree (A), Neutral (N), Disagree (D) and Strongly Disagree (SD) [6. The conduct of party primaries by national leadership of our party discourages accountability of elected representatives to their local bra…	Are there significant differences in the relationships between decentralized party organization and inclusive local participation in decision making in your Party? Where: Strongly Agree (SA), Agree (A), Neutral (N), Disagree (D) and Strongly Disagree (SD) [7. Consideration of diverse viewpoints from Chapters/Branches could enhance greater participation in decision-making in a party]	Are there significant differences in the relationships between decentralized party organization and inclusive local participation in decision making in your Party? Where: Strongly Agree (SA), Agree (A), Neutral (N), Disagree (D) and Strongly Disagree (SD) [8. Strong national party leadership’s control of Chapters/Branches enhances greater members participation in party affairs]	Are there significant differences in the relationships between decentralized party organization and inclusive local participation in decision making in your Party? Where: Strongly Agree (SA), Agree (A), Neutral (N), Disagree (D) and Strongly Disagree (SD) [9. My party (from Ward to zonal levels) organizes congresses and primaries at various levels, without interference from the national leadershi…	How does the level of decentralization of party structures enhance their ideologies in Nigeria ? Where: Strongly Agree (SA), Agree (A), Neutral (N), Disagree (D) and Strongly Disagree (SD) [1. My party has a training institute where its policies and programs are developed]	How does the level of decentralization of party structures enhance their ideologies in Nigeria ? Where: Strongly Agree (SA), Agree (A), Neutral (N), Disagree (D) and Strongly Disagree (SD) [2. I know my parties ideologies policies and programs]	How does the level of decentralization of party structures enhance their ideologies in Nigeria ? Where: Strongly Agree (SA), Agree (A), Neutral (N), Disagree (D) and Strongly Disagree (SD) [3. I believe in the ideologies and work to achieve the policies and programs of my party. ]	How does the level of decentralization of party structures enhance their ideologies in Nigeria ? Where: Strongly Agree (SA), Agree (A), Neutral (N), Disagree (D) and Strongly Disagree (SD) [4. National ,zonal and state leaders are trained at the institute]	How does the level of decentralization of party structures enhance their ideologies in Nigeria ? Where: Strongly Agree (SA), Agree (A), Neutral (N), Disagree (D) and Strongly Disagree (SD) [5. Party Chapter/Branches train and inculcate in members its policies and programs.]	How does the level of decentralization of party structures enhance their ideologies in Nigeria ? Where: Strongly Agree (SA), Agree (A), Neutral (N), Disagree (D) and Strongly Disagree (SD) [6. Effective distribution of power among party chapters and branches promotes understanding of party ideologies, policies and programs]
2024-04-28 20:23:52	56-65	Male	HND/BSC/(FIRST DEGREE)	SW	Lagos	Lagos Island	D2	Yes	PDP	16+ yrs	No	None		No		No		Yes	Boards	SA	SA	A	A	SA	A	SA	SA	A	A	SA	SA	A	A	A	A	SA	SA	SA	A	N	SA	SA	SA	SA				How does decentralized organizational structure impact on the membership stability of your Party?a
2024-04-30 05:06:14	36-45	Male	HND/BSC/(FIRST DEGREE)	NC	Nasarawa	Keana	MADAKI	Yes	PDP	16+ yrs	No			Yes	LG Executive	Yes	Ward Councilor	Yes	Adviser/Assistant	SA	SA	SA	A	SA	SD	A	A	SA	SD	SA	SD	SD	SD	D	D	D	SD	SD	D	SA	SA	SA	A	SA	SA	SA	Questions	SA	A
2024-04-30 07:54:12	46-55	Female	HND/BSC/(FIRST DEGREE)	SS	Delta	Aniocha North	Onicha Olona	Yes	APC	6-10 yrs	Yes	PDP	Factionalization, Non Inclusion in Decision-making, Imposition of Candidates, Hijack of Party Structure	Yes	LG Executive	Yes	State Assembly	Yes	Cabinet/Exco	SA	D	SD	SA	SA	D	SA	SA	SA	SD	SA	SA	SD	SD	SD	SD	SA	SA	SD	SD	D	N	D	D	D	SD	SA	1. My party has structures at the national, zonal, state, local and ward levels]	375	3
2024-04-30 13:25:47	36-45	Male	HND/BSC/(FIRST DEGREE)	NC	Nasarawa	Lafia	Lafia	Yes	PDP	16+ yrs	No	PDP		No		No		No		SA	SA	SA	SA	SA	SA	SA	SA	A	A	SA	SA	SA	SA	SA	SA	D	SA	SA	SA	SA	SA	SA	A	A	SA	SA	2. In my party, power is distributed among national, state and local party Branches.]	230	141
2024-04-30 14:56:30	46-55	Female	POSTGRADUATE	NW	Kaduna	Kaduna South	Barnawa 1	Yes	PDP	16+ yrs	No			Yes	National Executive	No		No		SA	SA	A	A	SA	SA	SA	A	SA	A	A	SA	D	N	D	N	A	A	A	SA	A	A	A	N	N	N	SA	3. The Chapters/Branches effectively perform responsibilities assigned to them by the party constitution]	28	28
																																															4. Decentralized organizational structure could positively influence the recruitment and retention of members in a party	37	335
2024-05-01 08:32:43	56-65	Male	HND/BSC/(FIRST DEGREE)	SS	Delta	Patani	one	Yes	PDP	6-10 yrs		APC	Factionalization	Yes	Ward Executive	No		Yes	Adviser/Assistant	D	SA	SA	A	A	D	A	SA	SA	SA	D	A	D	A	D	A	SA	A	SA	D	SD	D	D	SD	SD	D	N	5. Commitment of party members is enhanced when they participate in decision-making process of the party]	332	46
2024-05-01 13:18:14	46-55	Male	HND/BSC/(FIRST DEGREE)	NW	Kaduna	Jema'a	Kagoma	Yes	PDP	16+ yrs	No			No		No		Yes	Adviser/Assistant	SA	A	A	SA	A	N	N	N	A	A	A	N	D	A	N	N	A	A	N	D	D	N	N	D	N	N	SA	6. My party allows individual members opinion in reaching decisions]	28	74
2024-05-01 19:53:58	66 and above	Male	POSTGRADUATE	SW	Lagos	Lagos Mainland	Ward K.	Yes	PDP	16+ yrs	Yes	APC		No		No		No		SA	A	A	SA	SA	N	SA	SA	SA	SD	SA	SA	SD	A	D	D	SA	SA	SD	SA	SA	SA	SA	SA	A	D	SA	7. I have always paid my monthly dues.]	91	220
2024-05-02 18:40:30	56-65	Male	POSTGRADUATE	NW	Kaduna	Zaria LG	Kwarbai A	Yes	PDP	16+ yrs	Yes	Labour Party	Hijack of Party Structure	Yes	National Executive	No		Yes	Adviser/Assistant	SD	D	D	D	SA	D	SA	SA	A	N	SA	SA	D	N	N	N	N	SA	N	N	D	N	D	D	A	N	SA	8 . Party leaders sometimes pay dues for members]	144	231
2024-05-03 13:10:48	36-45	Male	POSTGRADUATE	NC	Nasarawa	KEANA	IWAGU	Yes	PDP	16+ yrs	No			No		No				SA	SA	SA	SA	SA	SA	SA	SA	SA	A	SA	SA	SA	SA	SA	SA	A	A	SA	SA	SA	SA	SA	A	SA	SA	SA	9. Infact, party leaders finance the party activities and programmes]	326	52
2024-05-03 14:04:18	46-55	Male	HND/BSC/(FIRST DEGREE)	NC	Nasarawa	Doma LGA	Galadima Ward	Yes	PDP	16+ yrs	No			Yes	LG Executive	No		No		SA	SA	SA	SA	SA	SA	A	SA	SA	A	SA	SA	D	A	SA	SA	D	A	D	A	A	SA	SA	A	N	A	A	10. Not taking part in decision making affects the sense of party ownership and commitment among members]	158	40
2024-05-03 14:14:31	36-45	Male	HND/BSC/(FIRST DEGREE)	NC	Nasarawa	Keana local government	Obene Ward	Yes	PDP	16+ yrs	No			Yes	Ward Executive					SA	SA	SA		SA	SA	A	A	A	A	SA	A	A	SA	SA	A	A	SA	SA	SA	A	SA	SA	A	A	SA	SA	11. The centralized pattern of decision making in the party positively affects party membership stability]	30	176
2024-05-03 14:37:40	56-65	Male	HND/BSC/(FIRST DEGREE)	NC	Nasarawa	Awe	Tunga	Yes	PDP	16+ yrs	No			Yes	State Executive	No		No		SA	SA	SA	A	SA	SA	A	SA	SA	SA	SA	SA	SA	SA	SA	SA	SA	SA	SA	SA	SA	SA	SA	A	A	SA	SA	12.Granting of more autonomy to local party chapters/branches could positively impact in their ability to retain members and foster loyalty]	52	295
2024-05-03 15:07:34	36-45	Male	WAEC/NECO	NC	Nasarawa	Toto	Ugya	Yes	PDP	16+ yrs	No			No		No		No
2024-05-03 15:46:39	46-55	Male	POSTGRADUATE	NC	Nasarawa	Doma	Agbashi	Yes	PDP	6-10 yrs	Yes	APGA	Imposition of Candidates	No		No		No		SA	SA	SA	A	SA	SA	A	A	SA	A	A	A	N	A	SA	SA	SD	SA	SA	A	N	A	A	N	A	A	SA		Are there significant differences in the relationships between decentralized party organization and inclusive local participation in decision making in your Party?
2024-05-04 00:21:53	56-65	Female	POSTGRADUATE	NW	Kaduna	SANGA	NINZO NORTH WARD	Yes	PDP	16+ yrs	Yes		Imposition of Candidates	Yes	State Executive	Yes	State Assembly	Yes	Cabinet/Exco		A	A	A	SA	A	N	N	A	A		SA	SA	A	A	SA	A	N	N	A	N	A	A	N	N	A	A	Questions	SA	A
2024-05-04 11:39:21	46-55	Male	POSTGRADUATE	SS	Delta	Ndokwa West	Ward 3	Yes	PDP	16+ yrs	No			Yes	State Executive	No		Yes	Adviser/Assistant	SA	SA	SA	SA	A	SA	N	N	N	D	A	N	SA	A	A	A	SD	SD	D	D	SA	SA	SA	A	A	A	A	1. Strong national party leadership’s control hinders the level of local autonomy in decision-making processes of our party]	16	148
2024-05-05 07:47:34	46-55	Male	POSTGRADUATE	SE	Imo	Aboh Mbaise	Uvuru 1	Yes	PDP	16+ yrs	Yes	Anpp	Hijack of Party Structure	Yes	State Executive	No		Yes	Adviser/Assistant	A	A	D	D	A	D	A	A	A	D	D	D	D	D	A	D	D	D	D	D	D	A	A	N	D	D	D	2. All Chapters/Branches of our party have reliable sources of funding]	18	37
2024-05-05 10:37:22	56-65	Male	WAEC/NECO	NC	Nasarawa	Keana	Kwara	Yes	PDP	16+ yrs	No	PDP		Yes	Ward Executive	No		Yes	Cabinet/Exco	SA	SA	SA	SA	SA	SA	SA	SA	SA	SA	SA	SA	SA	SA	SA	SA	SA	SA	SA	SA	SA	SA	SA	SA	SA	SA	SA	3.The nature of power distribution amongst our party Chapters/Branches ensures the inclusion of diverse local viewpoints in decision-making]	16	35
2024-05-06 10:12:46	36-45	Male	POSTGRADUATE	NC	Nasarawa	Wamba	Wayo	Yes	PDP	11-15 yrs	No			No		No		No		SA	SA	SA	SA	SA	N	N	N	A	N	N	D	D	N	A	N	D	N	N	D	SD	A	SA	SD	SD	N	N	4. The pattern of decision made at the Chapters/Branches of our party influences national party decision]	19	28
2024-05-06 18:05:46	36-45	Male	POSTGRADUATE	NC	Nasarawa	Keana	Kadarko	Yes	PDP	11-15 yrs	No			Yes	Ward Executive	No		Yes	Cabinet/Exco	SA	SA	A	SA	SA	A	A	A	A	SA	SA	SA	A	A	SA	SA	A	SA	SA	A	D	SA	SA	D	SD	SA	SA	5. The current structure of my party encourages members from diverse background to participate in decision making process]	56	148
2024-05-06 18:07:22	46-55	Male	POSTGRADUATE	NC	Nasarawa	Keana	Giza Galadima	Yes	PDP	16+ yrs	No			Yes	Zonal Executive	No		No		SA	A	SA	SA	SA	SA	SA	SA	SA	SD	SA	SA	SA	SA	A	A	SA	A	A	SA	N	N	A	N	N	SA	A	6. The conduct of party primaries by national leadership of our party discourages accountability of elected representatives to their local branches]	33	249
2024-05-06 19:26:23	46-55	Female	HND/BSC/(FIRST DEGREE)	NC	Nasarawa	Doma	Galadima ward Doma	Yes	PDP	16+ yrs	No			Yes	State Executive	Yes	Ward Councilor	No		SA	SA	SA	SA	SA	SA	A	A	A	SA	SA	A	A	SA	A	A		SA	SA	SA	A	A	A	N	A	SA	A	7. Consideration of diverse viewpoints from Chapters/Branches could enhance greater participation in decision-making in a party]	19	169
2024-05-06 19:59:47	46-55	Male	HND/BSC/(FIRST DEGREE)	NC	Nasarawa	Akwanga	Andaha	Yes	PDP	16+ yrs	No			Yes	LG Executive	No		No		SA	SA	SA	SA	SA	A	SA	A	A	A	SA	A	A	A	A	SA	A	SA		SA	A	SA	SA	N	SA	SA	SA	8. Strong national party leadership’s control of Chapters/Branches enhances greater members participation in party affairs]	18	19
2024-05-06 21:15:23	46-55	Male	HND/BSC/(FIRST DEGREE)	NC	Nasarawa	Obi	Kyakale	Yes	PDP	16+ yrs	No			Yes	LG Executive	No		No		SA	SA	SA	SA	SA	A	SA	A	SA	SA	SA	SA	D	N	A	N	SA	D	SD	A	A	SA	SA	A	SA	SA	SA	9. My party (from Ward to zonal levels) organizes congresses and primaries at various levels, without interference from the national leadership ]	54	51
2024-05-06 21:16:21	36-45	Male	POSTGRADUATE	NC	Nasarawa	Nasarawa Eggon LGA	Agunji/Ogbagi	No						Yes	Zonal Executive	No		No		D	D	D	D	N	A	N	N	A	D	SA	SA	SA	SA	SA	SA	SA	SA	SA	SA	D	N	N	N	N	N	N		How does the level of decentralization of party structures enhance their ideologies in Nigeria ?
2024-05-07 07:01:03	26-35	Male	HND/BSC/(FIRST DEGREE)	NC	Nasarawa	Keana LGA	Kadarko	Yes	PDP	16+ yrs	No			Yes	State Executive	No		No		A	SA	SA	A	SA	SA	SA	SA	SA	SA	SA	SA	A	SA	SA	A	SA	A	SA	SA	A	SA	SA	A	A	A	SA	Questions	SA	A
2024-05-07 08:54:57	46-55	Male	HND/BSC/(FIRST DEGREE)	NC	Nasarawa	Toto	Shafa kwotto	Yes	PDP	16+ yrs	No	PDP		Yes	LG Executive	No		Yes	Adviser/Assistant	SA	SA	SA	SA	SA	SA	SA	A	SA	SA	SA	SA	SA	SA	SA	SA	SA	SA	SA	SA	SA	SA	SA	SA	SA	SA	SA	1. My party has a training institute where its policies and programs are developed]	87	100
2024-05-07 14:59:29	36-45	Male	HND/BSC/(FIRST DEGREE)	NC	Nasarawa	Lafia	Assakio	Yes	PDP	16+ yrs	No			No		Yes	State Assembly			SA	SA	SA	A	A	A	SA	SA	A	SA	SA	A	A	A	A	A	A	A	A	SA	SA	SA	A	SA	A	A	A	2. I know my parties ideologies policies and programs]	85	134
2024-05-07 17:06:14	66 and above	Male	NCE/ND/TCII	NW	Nasarawa	KEANA	Madaki	Yes	PDP	16+ yrs	No			Yes	LG Executive	Yes	Ward Councilor	No		SA	SA	SA	A	SA	A		A	A	A	A					SA	A	A		A		SA	SA			A	SA	3. I believe in the ideologies and work to achieve the policies and programs of my party. ]	62	143
2024-05-07 18:22:57	36-45	Male	HND/BSC/(FIRST DEGREE)	NC	Nasarawa	Lafia	Assakio	Yes	PDP	16+ yrs	No			Yes	Ward Executive	No		Yes		SA	SA	SA	SA	SA	SA	SA	SA	SA	SA	SA	SA	SA	SA	SA	SA	SA	SA	SA	SA	SA	SA	SA	SA	SA	SA	SA	4. National ,zonal and state leaders are trained at the institute]	31	86
2024-05-07 18:26:26	36-45	Male	HND/BSC/(FIRST DEGREE)	NC	Nasarawa	Obi	Agwatashi	Yes	PDP	16+ yrs	No			No		No		No		SA	SA	SA	SA	SA	SA	A	SA	SA	SA	SA	SA	SA	SA	A	SA	A		SA	A	SA	N	SA	A	SA	SA	SA	5. Party Chapter/Branches train and inculcate in members its policies and programs.]	19	58
2024-05-09 10:21:18	46-55	Male	HND/BSC/(FIRST DEGREE)	NE	Adamawa	Hong	Bangshika	Yes	PDP	16+ yrs	No			Yes	State Executive	No		Yes	Adviser/Assistant	SA	A	N	A	A	A	N	A	SA	A	A	A	N	SA	N	SA	A	N	D	SA	N	A	SA	N	D	A	N	6. Effective distribution of power among party chapters and branches promotes understanding of party ideologies, policies and programs]	35	330
2024-05-09 16:05:59	36-45	Female	POSTGRADUATE	SS	Delta	UDU	Ward 4	Yes	PDP	11-15 yrs	No			Yes	State Executive	No		Yes	Special Assistant, senior special Assistant	SA	SA	SA	A	SA	A	A	SA	A	A	A	SA	A	A	A	A	A	A	A	A	N	A	A	N	A	A	A
2024-05-11 13:04:00	56-65	Male	POSTGRADUATE	NE	Adamawa	Song	Sigire song	Yes		16+ yrs	No			Yes	State Executive	No		Yes	Adviser/Assistant
2024-05-12 14:11:04	46-55	Male	POSTGRADUATE	SW	Lagos	Oshodi Isolo	Mafoluku Ward	Yes	PDP	16+ yrs	Yes	AD Alliance For Democracy	Hijack of Party Structure	Yes	LG Executive	Yes	State Assembly	Yes	National Delegate	SA	D	SD	A	D	N	N	A	SA	A	D	SA	SD	SD	SA	D	D	D	SA	SD	SA	A	A	N	N	SD	SA
2024-05-12 17:12:55	36-45	Male	HND/BSC/(FIRST DEGREE)	SW	Lagos	Oshodi	Ewu ward	Yes	PDP	11-15 yrs	No			No		No		No		SA	SA	SA	SA	SA	SA	A	SA	SA	SA	SA	SA	A	SA	SA	SA	A	SA	A	SA	A	SA	SA	A	A	SA	SA	How does decentralized organizational structure impact on the membership stability of your Party?
2024-05-12 17:17:12	56-65	Male	POSTGRADUATE	SW	Lagos	Lagos Island	Ward F2, Ilasamaja	Yes	PDP	11-15 yrs	Yes	APC	Imposition of Candidates	No		No		Yes	National Campaign council	SA	SA	SA	SA	SA	SA	A	SA	SA	SA	SA	SD	SA	SA	A	A	SA	A	SA	SD	SA	SA	SA	SD	A	A	SA
2024-05-12 17:45:59	46-55	Male	HND/BSC/(FIRST DEGREE)	SW	Lagos	Ojo	Yaba/Ojuelegba in Surulere, Lagos	Yes	PDP	16+ yrs	No			Yes	State Executive	No		No		SA	SA	SD	SA	SA	D	SA	SA	N	D	SA	SA	SD	SA	A	SD	SA	SD	SA	SA	SA	SA	SA	SA	SA	SD	SA
2024-05-12 21:51:28	46-55	Male	NCE/ND/TCII	NE	Adamawa	Mubi south	Gella ward	Yes	PDP	16+ yrs	No			Yes	Zonal Executive	Yes	Ward Councilor	Yes	Adviser/Assistant	SA	SA	SA	SA	SA	SA	SA	SA	A	SA	SA	SA	SA	SA	SA	SA	SA	SA	SA	A	SA	SA	SA	A	A	SA	SA
2024-05-12 23:53:58	46-55	Male	HND/BSC/(FIRST DEGREE)	SE	Enugu	Awgu	C	Yes	PDP	16+ yrs	No			Yes	State Executive	Yes	Ward Councilor	No		SA	A	A	SA	SA	D	D	D	SD	D	SA	A	N	N	N	A	SA	A	N	N	N	D	D	N	A	D	SA
2024-05-13 06:42:21	46-55	Male	HND/BSC/(FIRST DEGREE)	NC	Adamawa	Toungo	Toungo 1	Yes	PDP	16+ yrs	No			No		Yes	State Assembly			SA	SA	SA	SA	SA	SA		SA	SA		SA	SA	SA	SA	SA	SA	SA	SA	A	A	SA	SA	SA	SA	A	SA	A
2024-05-13 14:09:40	56-65	Male	POSTGRADUATE	SW	Lagos	Epe	J1	Yes	PDP	16+ yrs	No			Yes	State Executive	No		Yes	Lagos East coordinator for Sure-P	A		SA	A	SA	A	A	A	SA	SA	A	A	N	A	A	A	N	A	N	A	A	SA	SA	N	N	A	A
2024-05-13 16:23:29	56-65	Male	POSTGRADUATE	SW	Ogun	Abeokuta north	Ward di	Yes	PDP	11-15 yrs	Yes	AD	Factionalization	Yes	LG Executive	Yes	MFR	No		SA	SA	A	A	A	A	A	A	N	A	A	A	N	A	A	A	N	A	N	N	A	A	A	N	A	A	A
2024-05-14 16:53:35	56-65	Male	HND/BSC/(FIRST DEGREE)	NE	Adamawa	Demsa	Borrong	Yes	PDP	1-5 yrs	No			No		No		Yes	Adviser/Assistant	SA	SA	A	SA	A	N	D	A	A	A	A	N	D	A	A	SD	SD	N	SD	N	A	A	A	N	D	D	D
2024-05-14 19:16:00	56-65	Male	POSTGRADUATE	SW	Lagos	Lagos Island	Langbasa	Yes	PDP	16+ yrs	No			Yes	State Executive	No		No		SA	D	N	SA	SA	SA	SA	A	SA	D	A	N	SD	N	N	A	A	A	N	SD	SA	SA	SA	A	N	N	A
2024-05-15 08:00:02	46-55	Female	NCE/ND/TCII	NE	Adamawa	LAMURDE LOCAL GOVERNMENT.	GYAWANA .	Yes	PDP	16+ yrs	No			Yes	LG Executive	No		Yes	VICE CHAIRMAN TRANSITION COMMITTEE.	SA	SA	SA	A	SA	A	A	A	SA	SA	A	A		A	A	A	A	A	A	A	A	A	SA	A	A	SA	A
2024-05-15 20:44:28	36-45	Female	NCE/ND/TCII	SS	Delta	Aniocha North	Onicha Ugbo	Yes	PDP	1-5 yrs	Yes	APC	Non Inclusion in Decision-making, Imposition of Candidates, Hijack of Party Structure	Yes	LG Executive	No		Yes	Adviser/Assistant	SA	SA	D	A	SA	N	A	SA	SA	SD	A	SA	D	D	D	D	A	A	SD	D	A	A	N	A	D	D	A
2024-05-15 21:19:36	66 and above	Male	POSTGRADUATE	SW	Lagos	Badagry	Ward E	Yes	PDP	16+ yrs	No			Yes		Yes		Yes	Boards	SA	SA	A	SA	A	A	A	A	A	A	SA	A	D	A	A	SA	SA	A	N	A	A	SA	A	N	A	A	A
2024-05-15 21:48:42	56-65	Male	POSTGRADUATE	NC	Nasarawa	Akwanga	Gwanje Gwanje	Yes	PDP	11-15 yrs	No			Yes	National Executive	Yes	MFR	Yes	Cabinet/Exco	SA	SA	A	N	D	A	SA	SA	A	A	D	D	A	A	A	A	D	D	A	A	SA	SA	SA	SA	A	A	D
2024-05-15 21:58:05	46-55	Female	POSTGRADUATE	NC	Nasarawa	Keffi	Angwan Iya 1	Yes	PDP	6-10 yrs	Yes	APC	Non Inclusion in Decision-making, Imposition of Candidates, Hijack of Party Structure	Yes	Zonal Executive	Yes	State Assembly	Yes	Boards	SA	SA	D	SA	SA	A	A	SA	SA	D	A	A	D	D	A	A	SA	SA	SD	D	SA	A	A	A	N	D	A
2024-05-15 22:05:09	36-45	Female	NCE/ND/TCII	NC	Nasarawa	Karu	Karshi 1	Yes	PDP	6-10 yrs	No			No		Yes	Ward Councilor	No		SA	D	SD	SA	SA	D	A	SA	SA	SD	A	SA	D	A	A	A	SA	A	SD	D	SA	N	N	A	D	D	A
2024-05-15 22:17:25	46-55	Female	WAEC/NECO	NC	Nasarawa	Lafia	Assakio	Yes	PDP	6-10 yrs	Yes	APC	Non Inclusion in Decision-making, Imposition of Candidates, Hijack of Party Structure	No		No		No		SA	A	SD	A	SA	D	A	SA	SA	SD	A	SA	D	A	A	D	SA	A	D	D	SA	A	A	A	N	D	A
2024-05-15 22:29:57	26-35	Female	HND/BSC/(FIRST DEGREE)	NC	Nasarawa	Nasarawa Egon	Agwuji/Ogbagi	Yes	PDP	6-10 yrs	No			Yes	Ward Executive	No		No		SA	A	D	A	SA	N	A	SA	SA	D	A	SA	D	A	A	A	SA	SA	SD	SD	A	A	N	N	D	D	A
2024-05-15 22:48:01	66 and above	Female	NCE/ND/TCII	NC	Nasarawa	Wamba	Wayo	Yes	PDP	16+ yrs	No			Yes	Ward Executive	No		Yes	Cabinet/Exco	SA	A	D	A	SA	N	A	SA	SA	SD	A	SA	D	D	D	D	A	A	SD	D	A	A	A	A	D	D	A
2024-05-17 18:45:10	46-55	Male	POSTGRADUATE	NC	Nasarawa	Awe	Tunga	Yes	PDP	6-10 yrs	Yes	APC	Imposition of Candidates, Hijack of Party Structure	No		Yes	MFR			SA	A	D	SA	SA	A	A	SA	SA	D	N	SA	D	D	D	D	A	A	D	D	SA	SA	SA	A	N	N	A
2024-05-17 18:51:32	46-55	Female	HND/BSC/(FIRST DEGREE)	SS	Delta	Aniocha North	Isselle Uku 1	Yes	PDP	11-15 yrs	No			Yes	State Executive	No				SA	A	D	A	SA	A	SA	SA	SA	D	A	SA	D	A	A	A	A	A	D	D	SA	A	A	SA	N	D	A
2024-05-17 18:57:26	36-45	Male	POSTGRADUATE	SS	Delta	Bomadi	Akugbene 11	Yes	PDP	6-10 yrs	No			Yes	State Executive	No				SA	A	D	A	SA	A	SA	SA	SA	SD	A	SA	D	D	D	SD	A	A	SD	D	SA	A	A	A	N	D	A
2024-05-17 19:10:31	56-65	Male	POSTGRADUATE	SS	Delta	Ethiope East	Agbona 111	Yes	APC	6-10 yrs	Yes	PDP	Hijack of Party Structure	Yes	LG Executive	No				SA	A	D	A	SA	A	A	A	SA	D	A	A	D	D	D	D	SA	A	SD	D	D	A	A	D	D	D	A
2024-05-17 19:17:06	36-45	Female	HND/BSC/(FIRST DEGREE)	SS	Delta	Ika North East	Ovia 11	Yes	APC	6-10 yrs	Yes	PDP	Non Inclusion in Decision-making	Yes	State Executive	No				SA	A	D	A	SA	A	A	SA	SA	D	A	A	D	D	D	D	A	A	D	D	D	A	N	D	N	D	A
2024-05-17 19:23:55	56-65	Male	WAEC/NECO	SS	Delta	Ethiope West	Jesse 11	Yes	APC	6-10 yrs	No			Yes	State Executive	No		No		SA	A	D	A	SA	A	A	SA	SA	D	A	SA	D	D	D	D	A	A	SD	SD	D	A	A	SD	D	D	A
2024-05-17 19:29:51	46-55	Female	HND/BSC/(FIRST DEGREE)	SS	Delta	Ika South	Agbor 11	Yes	APC	6-10 yrs	No			Yes	State Executive	No				SA	A	D	A	SA	A	A	SA	SA	D	A	SA	D	D	D	D	A	A	D	D	D	N	N	D	D	D	A
2024-05-17 19:36:12	26-35	Male	HND/BSC/(FIRST DEGREE)	SS	Delta	Ndokwa West	Abbi 1	Yes	APC	1-5 yrs	No			Yes	Ward Executive	No		No		SA	A	D	A	SA	N	A	SA	SA	D	A	SA	D	D	D	D	A	A	SD	SD	D	N	N	SD	SD	D	A
2024-05-17 19:42:38	36-45	Male	HND/BSC/(FIRST DEGREE)	SS	Delta	Udu	Aladja	Yes	APC	6-10 yrs	No			Yes	LG Executive	No		No		SA	A	D	A	SA	N	A	SA	SA	D	A	SA	D	D	D	D	A	A	D	SD	D	N	N	D	N	D	A
2024-05-17 19:48:45	18-25	Male	WAEC/NECO	SS	Delta	Ndokwa West	Ogume 1	Yes	APC	1-5 yrs	No			Yes	Ward Executive	No		No		SA	A	SD	A	SA	N	A	SA	SA	D	A	SA	D	D	D	D	A	A	SD	D	SD	D	N	SD	D	D	A
2024-05-17 19:54:57	36-45	Male	HND/BSC/(FIRST DEGREE)	SS	Delta	Ughelli South	Ewu 11	Yes	PDP	6-10 yrs	No			No		Yes	Ward Councilor	No		SA	A	D	A	SA	N	A	SA	SA	D	A	A	D	D	D	D	A	A	SD	SD	A	A	A	A	A	D	A
2024-05-17 20:01:38	46-55	Female	NCE/ND/TCII	NC	Nasarawa	Keana	Iwagu	Yes	APC	1-5 yrs	Yes	PDP	Non Inclusion in Decision-making, Hijack of Party Structure	Yes	LG Executive	No		No		SA	A	D	A	SA	N	A	SA	SA	D	A	SA	D	D	D	D	A	A	D	D	SA	N	N	A	D	D	A	Are there significant differences in the relationships between decentralized party organization and inclusive local participation in decision making in your Party?
2024-05-17 20:09:50	46-55	Female	HND/BSC/(FIRST DEGREE)	SS	Delta	Warri South Weat	Oporoza	Yes	APC	6-10 yrs	No			No		No				SA	A	D	A	SA	N	A	SA	SA	D	A	A	D	D	D	D	A	A	D	D	D	N	N	N	D	D	A
2024-05-17 20:18:10	46-55	Male	NCE/ND/TCII	SS	Delta	Uvwie	Ekpan 1	Yes	APC	6-10 yrs	No			No		No		No		SA	A	D	A	SA	N	A	SA	SA	D	A	A	D	D	D	D	A	A	D	D	D	N	N	D	D	D	N
2024-05-18 09:38:20	36-45	Female	NCE/ND/TCII	NE	Adamawa	Fufore	Karlahi	Yes	APC	6-10 yrs	Yes	PDP	Imposition of Candidates, Hijack of Party Structure	Yes	State Executive	Yes	State Assembly	No		SA	A	D	A	SA	A	A	SA	SA	D	A	SA	N	D	D	D	A	A	D	D	D	N	N	D	D	D	A
2024-05-18 09:45:58	26-35	Male	WAEC/NECO	NE	Adamawa	Ganye	Yebbi	Yes	APC	1-5 yrs	No			Yes	Ward Executive	No				SA	D	D	A	SA	N	A	SA	SA	SD	A	A	N	D	D	D	SA	A	SD	D	D	N	N	D	D	SD	A
2024-05-18 10:00:52	46-55	Female	HND/BSC/(FIRST DEGREE)	SS	Delta	Oshimili North	Okpanam	Yes	PDP	11-15 yrs	No			No		Yes	State Assembly	Yes	Adviser/Assistant	SA	A	N	A		A	A	SA	SA	D	A	A	N	D	D	D	D	A	D	D	SA	A	A	A	A	SA	A
2024-05-18 10:29:29	56-65	Male	HND/BSC/(FIRST DEGREE)	SS	Delta	Aniocha South	Ubulu Uku	Yes	APC	6-10 yrs	Yes	PDP	Imposition of Candidates	No		Yes	State Assembly	Yes	Adviser/Assistant	SA	A	D	A	SA	A	A	SA	A	D	A	A	D	D	D	D	A	A	D	D	D	A	A	D	D	D	A
2024-05-18 10:34:28	36-45	Female	WAEC/NECO	SS	Delta	Ika South	Agbor 11	Yes	APC	6-10 yrs	No			No		No		No		SA	D	D	A	SA	N	A	SA	SA	D	A	A	N	D	D	D	SA	A	SD	SD	D	N	N	D	D	SD	A
2024-05-18 10:42:07	26-35	Female	HND/BSC/(FIRST DEGREE)	NE	Adamawa	Madagali	Wagga	Yes	APC	1-5 yrs	Yes	PDP	Non Inclusion in Decision-making, Imposition of Candidates	Yes	LG Executive	No		No		SA	A	D	A	SA	N	A	A	SA	D	A	SA	N	D	D	D	A	A	D	D	D	N	N	D	D	D	A
2024-05-18 10:49:06	66 and above	Male	POSTGRADUATE	NE	Adamawa	Michika	Bazza Margi	Yes	APC	6-10 yrs	Yes	ANPP		Yes	Zonal Executive	Yes	State Assembly	No		SA	A	D	A	SA	A	A	SA	SA	SD	A	A	N	D	D	D	A	A	D	D						D
2024-05-18 10:54:13	36-45	Female	NCE/ND/TCII	NE	Adamawa	Mubi North	Sabon Layi	Yes	APC	6-10 yrs	No			Yes	State Executive	No		No		SA	A	D	A	SA	N	A	SA	SA	D	A	A	N	D	D	D	SA	A	D	D	D	N	N	D	D	N	A
2024-05-18 11:01:28	36-45	Female	WAEC/NECO	NE	Adamawa	Hong	Garaha	Yes	APC	1-5 yrs	Yes	PDP	Imposition of Candidates	Yes	Ward Executive	No		No		SA	A	D	A	SA	N	A	SA	SA	D	A	A	N	D	D	D	A	A	SD	D	D	N	N	D	N	D	A
2024-05-18 11:18:01	56-65	Female	FSLC	NE	Adamawa	Fufore	Ribadu	Yes	PDP	11-15 yrs	No			Yes	State Executive	No		Yes	Adviser/Assistant	SA	A	D	A	SA	N	A	SA	SA	D	A	A	N	D	D	D	SA	A	SD	D	SA	A	A	A	A	N	A
2024-05-18 11:22:57	18-25	Female	NCE/ND/TCII	NE	Adamawa	Gombi	Yang	Yes	PDP	1-5 yrs	No			Yes	Ward Executive	No		No		SA	SA	N	A	SA	N	A	SA	SA	SD	A	A	N	N	D	D	A	A	D	SD	SA	N	N	A	N	N	A
2024-05-18 11:31:53	56-65	Female	FSLC	NE	Adamawa	Ganye	Yebbi	Yes	PDP	16+ yrs	No			Yes	State Executive	Yes	State Assembly	Yes	Cabinet/Exco	SA	A	D	A	SA	SA	A	SA	SA	D	A	A	A	D	D	D	A	A	SD	D	SA	A	A	SA	A	N	A
2024-05-18 11:50:23	36-45	Male	HND/BSC/(FIRST DEGREE)	NE	Adamawa	Demsa	Gwamba	Yes	APC	1-5 yrs	Yes	PDP	Non Inclusion in Decision-making, Imposition of Candidates	Yes	State Executive	No		No		SA	A	D	A	SA	A	A	SA	SA	D	A	A	N	D	D	D	SA	A	D	D	D	A	A	D	D	N	A
2024-05-18 11:55:12	46-55	Female	HND/BSC/(FIRST DEGREE)	NE	Adamawa	Jada	Yelli	Yes	APC	6-10 yrs	No			Yes	State Executive	No		No		SA	A	D	A	SA	A	A	SA	SA	D	A	A	N	D	D	D	SA	A	D	D	D	A	A	N	D	D	A
2024-05-18 12:00:40	36-45	Female	WAEC/NECO	NE	Adamawa	Girie	Damare	Yes	APC	6-10 yrs	No			Yes	LG Executive	No		No		SA	A	D	A	SA	A	A	SA	SA	D	A	A	N	D	D	D	A	A	D	D	D	A	A	D	N	D	A
2024-05-18 12:07:05	26-35	Female	NCE/ND/TCII	NE	Adamawa	Guyuk	Chikila	Yes	APC	6-10 yrs	No			Yes	LG Executive	No		No		SA	A	D	A	SA	A	A	SA	A	D	A	A	N	D	D	D	A	A	D	D	D	N	N	D	N	D	A
2024-05-18 12:18:05	56-65	Male	NCE/ND/TCII	NC	Nasarawa	Keffi	Gangare Tudu	Yes	APC	1-5 yrs	Yes	APGA	Imposition of Candidates, Hijack of Party Structure	Yes	LG Executive	No		No		SA	A	D	A	SA	N	A	SA	SA	D	A	A	N	D	D	D	A	A	D	D	D	N	N	D	D	D	A
2024-05-18 12:30:13	26-35	Male	WAEC/NECO	NE	Adamawa	Guyuk	Guyuk	Yes	APC	6-10 yrs	No			Yes	Ward Executive	No		No		SA	A	D	A	SA	N	A	SA	SA	D	A	A	D	D	D	D	A	A	D	D	D	N	N	N	N	D	A	How does the level of decentralization of party structures enhance their ideologies in Nigeria ?
2024-05-18 15:35:56	36-45	Female	WAEC/NECO	NC	Nasarawa	Doma	Agbashi	Yes	APC	6-10 yrs	No			Yes	Ward Executive	No		No		SA	N	D	A	SA	N	A	SA	SA	SD	A	A	D	D	D	D	SA	A	D	D	D	N	N	N	D	D	A
2024-05-18 15:42:04	36-45	Male	WAEC/NECO	NC	Nasarawa	Lafia	Assakio	Yes	APC	6-10 yrs	Yes	PDP	Imposition of Candidates, Hijack of Party Structure	Yes	LG Executive	No		Yes	Adviser/Assistant	SA	A	D	A	SA	N	A	SA	SA	D	A	A	D	D	D	D	SA	A	SD	SD	D	N	N	N	D	N	A
2024-05-18 15:51:22	46-55	Male	WAEC/NECO	NC	Nasarawa	Karu	Kokona	Yes	APC	6-10 yrs	No			Yes	LG Executive	No		No		SA	A	D	A	SA	N	A	SA	SA	SD	A	A	N	D	D	D	SA	A	SD	SD	D	A	N	N	D	D	A
2024-05-18 15:57:35	46-55	Male	HND/BSC/(FIRST DEGREE)	NC	Nasarawa	Wamba	Wayo	Yes	APC	1-5 yrs	No			No		No		No		SA	A	D	A	SA	A	A	SA	SA	D	A	A	N	SD	SD	D	SA	A	SD	SD	D	N	N	D	D	D	A
2024-05-18 16:07:13	18-25	Male	WAEC/NECO	NC	Nasarawa	Doma	Galadima	Yes	APC	1-5 yrs	No			No		No		No		SA	A	D	A	SA	N	A	SA	SA	D	A	A	N	D	D	D	SA	A	SD	SD	D	N	N	N	N	D	A
2024-05-18 16:11:59	36-45	Female	HND/BSC/(FIRST DEGREE)	NC	Nasarawa	Awe	Tunga	Yes	APC	6-10 yrs	No			Yes	Zonal Executive	No		Yes	Adviser/Assistant	SA	A	N	A	SA	A	A	SA	SA	D	A	SA	N	D	D	D	A	A	SD	D	N	A	A	N	N	N	A
2024-05-18 17:53:07	56-65	Male	HND/BSC/(FIRST DEGREE)	NC	Nasarawa	Lafia	Assakio	Yes	APC	6-10 yrs	Yes	ANPP	Factionalization, Hijack of Party Structure	Yes	National Executive	Yes	State Assembly	Yes	Cabinet/Exco	SA	SA	A	A	SA	SA	A	SA	A	A	N	D	A	N	A	A	D	A	A	A	N	SA	SA	D	A	A	A
2024-05-18 17:59:38	56-65	Male	POSTGRADUATE	NC	Nasarawa	Toto	Shaffa kwotto	Yes	PDP	16+ yrs	No			Yes	National Executive	Yes	State Assembly	Yes	Cabinet/Exco	SA	SA	A	N	SA	SD	A	SA	A	A	N	D	SA	A	A	A	D	A	A	A	SA	SA	SA	SA	A	A	A
2024-05-18 18:07:52	36-45	Female	WAEC/NECO	NC	Nasarawa	Obi	Agwatashi	Yes	APC	6-10 yrs	No			No		No		Yes	Adviser/Assistant	SA	A	D	A	SA	N	A	SA	SA	D	A	A	N	D	D	D	A	A	D	D	D	N	N	D	N	D	A
2024-05-18 18:16:55	46-55	Female	NCE/ND/TCII	NC	Nasarawa	Nasarawa Egon	Agwuji/ Pgbagi	Yes	APC	6-10 yrs	No			No		No		Yes	Boards	SA	A	D	A	SA	N	A	SA	SA	D	A	A	N	D	D	D	SA	A	D	D	D	N	N	N	D	N	A
2024-05-18 19:57:58	36-45	Female	HND/BSC/(FIRST DEGREE)	NC	Nasarawa	Keffi	Angwan Iya 1	Yes	PDP	11-15 yrs	No			Yes	State Executive	Yes	State Assembly	No		SA	A	N	A	SA	SA	A	SA	SA	D	A	SA	D	D	D	D	SA	A	D	D	SA	A	A	SA	A	N	A
2024-05-18 20:05:25	36-45	Female	NCE/ND/TCII	NC	Nasarawa	Akwanga	Andcha	Yes	APC	6-10 yrs	No			Yes	State Executive	No		Yes	Boards	SA	A	D	A	SA	A	A	SA	SA	D	A	A	N	D	D	D	SA	A	D	D	D	A	N	N	N	D	A
2024-05-18 20:14:35	26-35	Female	NCE/ND/TCII	NC	Nasarawa	Keffi	Gangare Tudu	Yes	APC	1-5 yrs	No			Yes	Ward Executive	No		No		SA	N	D	A	SA	N	A	SA	SA	D	A	SA	D	D	D	D	SA	A	D	D	N	N	N	N	D	D	A
2024-05-18 20:20:29	56-65	Female	POSTGRADUATE	NC	Nasarawa	Lafia	Nasarawa	Yes	APC	6-10 yrs	Yes	PDP	Imposition of Candidates, Hijack of Party Structure	No				Yes	Adviser/Assistant	SA	A	D	A	SA	A	A	SA	SA	D	A	A	N	D	D	D	A	A	D	D	N	A	A	N	N	D	A
2024-05-18 20:25:45	46-55	Male	HND/BSC/(FIRST DEGREE)	NC	Nasarawa	Keana	Iwagu	Yes	APC	6-10 yrs	No			No		No		No		SA	A	D	A	SA	N	A	SA	SA	D	N	A	D	D	D	D	A	A	D	D	N	N	N	N	D	D	A
2024-05-18 20:33:42	26-35	Male	WAEC/NECO	NE	Adamawa	Mubi South	Gella	Yes	PDP	1-5 yrs	Yes	APC	Imposition of Candidates, Hijack of Party Structure	Yes	Ward Executive	No		No		SA	A	D	A	SA	N	A	SA	SA	D	A	A	D	D	D	D	SA	A	D	D	A	N	N	A	N	D	A
2024-05-18 21:18:08	36-45	Male	WAEC/NECO	NE	Adamawa	Mayo Belwa	Binyeri	Yes	PDP	11-15 yrs	No			Yes	LG Executive	No		Yes	LGA Supervisor	SA	SA	D	A	SA	A	A	SA	SA	SD	A	SA	D	D	SD	D	A	A	SD	D	SA	A	N	A	N	N	A
2024-05-18 21:25:43	66 and above	Male	WAEC/NECO	NE	Adamawa	Maiha	Humbutudi	Yes	PDP	16+ yrs	No			Yes	Zonal Executive	Yes	MFR	Yes	Cabinet/Exco	SA	SA	D	A	SA	SA	A	SA	SA	D	A	A	N	D	SD	N	N	A	N	N	SA	A	A	SA	A	N	A
2024-05-18 21:34:31	56-65	Female	HND/BSC/(FIRST DEGREE)	NE	Adamawa	Michika	Bazza Margi	Yes	PDP	1-5 yrs	Yes	APC	Imposition of Candidates, Hijack of Party Structure	Yes	LG Executive	No		Yes	Adviser/Assistant	SA	A	D	A	SA	A	A	SA	SA	SD	A	A	D	D	SD	D	SA	A	D	D	SA	N	N	A	N	N	A	How does decentralized organizational structure impact on the membership stability of your Party?a
2024-05-18 21:48:07	26-35	Female	NCE/ND/TCII	NE	Adamawa	Yola North	Yelwa	Yes	PDP	6-10 yrs	No			Yes	Ward Executive	No		Yes	Supervisory Of Works	SA	A	D	SA	SA	A	A	SA	SA	D	A	A	D	D	D	A	A	A	D	D	SA	A	A	A	D	N	A
2024-05-19 04:29:53	36-45	Female	WAEC/NECO	NE	Adamawa	Song	Dirma	Yes	PDP	6-10 yrs	Yes	APC	Imposition of Candidates, Hijack of Party Structure	Yes	Ward Executive	No		Yes	LGA Supervisor	SA	A	D	A	SA	N	A	SA	SA	D	A	A	N	D	D	D	A	A	D	SD	A	A	A	A	N	D	A
2024-05-19 04:35:23	36-45	Male	HND/BSC/(FIRST DEGREE)	NE	Adamawa	Yola South	Mbamoi	Yes	APC	6-10 yrs	No			Yes	State Executive	No		No		SA	A	D	A	SA	A	A	SA	SA	D	A	A	N	N	N	N	A	A	D	D	D	A	A	N	N	D	A
2024-05-19 04:40:22	26-35	Female	NCE/ND/TCII	NE	Adamawa	Shelleng	Kiri	Yes	APC	6-10 yrs	No			Yes	LG Executive	No		No		SA	SA	D	A	SA	N	A	SA	SA	D	A	A	N	D	D	D	A	A	D	D	N	N	N	D	D	D	A
2024-05-19 04:44:45	26-35	Female	WAEC/NECO	NE	Adamawa	Numan	Numan 11	Yes	APC	1-5 yrs	No			Yes	Ward Executive	No		No		SA	SA	D	A	SA	N	A	SA	A	D	A	A	D	D	D	D	A	A	D	D	D	N	N	D	D	D	A
2024-05-19 04:49:29	56-65	Male	FSLC	NE	Adamawa	Shelleng	Kiri	Yes	APC	1-5 yrs	No			Yes	Ward Executive	No		No		SA	SA	D	A	SA	N	A	SA	SA	D	A	A	SD	SD	SD	SD	SA	A	SD	SD	D	N	N	D	D	D	A
2024-05-19 04:55:15	36-45	Female	FSLC	NE	Adamawa	Numan	Gamadio	Yes	APC	6-10 yrs	Yes	SDP	Imposition of Candidates, Hijack of Party Structure	No		No		No		SA	SA	D	A	SA	N	A	A	SA	D	A	A	N	N	N	N	A	A	D	SD	N	N	N	N	N	N	A
2024-05-19 05:05:17	36-45	Female	WAEC/NECO	NE	Adamawa	Mubi South	Dirb8shu/Gandira	Yes	PDP	6-10 yrs	No			No		No		Yes	Adviser/Assistant	SA	SA	D	A	SA	A	A	SA	SA	D	A	A	N	N	N	N	A	A	D	D	A	N	N	A	N	D	A
2024-05-19 07:51:56	18-25	Male	WAEC/NECO	NE	Adamawa	Demsa	Dong	Yes	APC	1-5 yrs	No			No		No				SA	SA	D	A	SA	N	A	SA	SA	SD	A	A	D	D	D	D	SA	A	SD	SD	D	N	N	D	N	SD	A
2024-05-19 07:56:31	46-55	Female	WAEC/NECO	NE	Adamawa	Ganye	Ganye 11	Yes	APC	6-10 yrs	No			No		No		No		SA	A	N	A	SA	N	A	SA	SA	D	A	A	D	D	SD	SD	SA	A	SD	SD	N	N	N	N	D	D	A
2024-05-19 08:01:32	36-45	Male	WAEC/NECO	NE	Adamawa	Gombi	Duwa	Yes	PDP	1-5 yrs	Yes	APC	Imposition of Candidates, Hijack of Party Structure	No		No		No		SA	SA	N	A	SA	N	A	SA	SA	D	A	SA	SD	D	D	D	SA	D	SD	SD	SA	N	N	A	N	D	A
2024-05-19 08:05:51	26-35	Male	WAEC/NECO	NE	Adamawa	Guyuk	Chikila	Yes	APC	1-5 yrs	No			No		No		No		SA	SA	D	A	SA	N	A	A	SA	SD	A	A	N	D	D	D	SA	A	SD	D	D	N	N	D	D	N	SA
2024-05-19 08:11:44	66 and above	Female	WAEC/NECO	NE	Adamawa	Mubi North	Digil	Yes	APC	6-10 yrs	Yes	PDP	Imposition of Candidates	No		Yes	Ward Councilor	Yes	LGA Supervisor	SA	SA	D	A	SA	A	A	SA	SA	D	A	A	SD	D	D	D	A	A	SD	D	D	N	N	D	D	SD	A
2024-05-19 08:16:38	36-45	Female	FSLC	NE	Adamawa	Madagali	Wagga	Yes	APC	6-10 yrs	No			No		No		No		SA	SA	SD	A	SA	N	A	SA	SA	SD	A	A	SD	D	SD	D	A	A	SD	D	D	N	N	D	D	D	A
2024-05-19 08:24:05	26-35	Female	FSLC	NE	Adamawa	Mayo Belwa	Gorobi	Yes	PDP	6-10 yrs	Yes	APC	Imposition of Candidates, Hijack of Party Structure	No		No		No		SA	SA	SD	A	SA	N	A	SA	SA	D	A	A	SD	SD	SD	SD	SA	A	SD	SD	SA	A	A	N	N	D	A
2024-05-19 08:29:55	46-55	Female	WAEC/NECO	NE	Adamawa	Jada	Mbulo	Yes	APC	1-5 yrs	No			No		No		No		SA	SA	D	A	SA	N	A	SA	SA	D	A	A	SD	D	D	D	SA	A	SD	D	N	N	N	D	N	D	A
2024-05-19 08:37:45	56-65	Male	WAEC/NECO	NE	Adamawa	Hong	Goya	Yes	PDP	11-15 yrs	No			No		No		Yes	Adviser/Assistant	SA	SA	D	A	SA	A	A	SA	SA	D	A	A	SD	SD	SD	D	A	A	SD	SD	SA	A	A	A	N	SD	A
2024-05-19 10:44:48	36-45	Female	WAEC/NECO	NE	Adamawa	Guyuk	Dumna	Yes	APC	6-10 yrs	No			No		No		No		SA	SA	D	A	SA	N	A	SA	SA	SD	A	A	D	D	SD	SD	SA	A	SD	D	D	N	N	D	N	D	A
2024-05-19 10:49:27	26-35	Male	WAEC/NECO	NE	Adamawa	Ganye	Gamu	Yes	APC	1-5 yrs	No			No		No		No		SA	A	D	A	SA	N	A	SA	SA	D	A	A	SD	SD	SD	SD	SA	A	SD	D	D	N	N	D	N	D	A
2024-05-19 10:53:34	46-55	Female	FSLC	NE	Adamawa	Larmude	Waduku	Yes	APC	6-10 yrs	No			No		No		No		SA	SA	SD	A	SA	N	A	SA	SA	SD	A	SA	D	D	D	D	A	A	D	D	N	N	N	D	D	SD	A
2024-05-19 10:58:13	18-25	Female	FSLC	NE	Adamawa	Yola South	Yolde Kohi	Yes	PDP	1-5 yrs	No			No		No		No		SA	SA	SD	A	SA	N	A	A	SA	D	A	A	N	D	D	D	SA	A	D	SD	A	A	N	A	N	N	A
2024-05-19 11:03:11	36-45	Female	WAEC/NECO	NE	Adamawa	Numan	Bolki	Yes	PDP	6-10 yrs	No			No		Yes	Ward Councilor	No		SA	A	D	A	SA	N	A	SA	SA	D	A	A	D	D	D	D	SA	A	D	SD	SA	A	A	A	N	D	A
2024-05-19 11:10:20	46-55	Female	WAEC/NECO	NE	Adamawa	Toungo	Toungo 111	Yes	PDP	11-15 yrs	No			No		No		Yes	Boards	SA	SA	N	A	SA	N	A	A	SA	D	A	A	D	D	D	D	A	A	D	D	A	A	A	A	N	D	A
2024-05-19 11:17:04	26-35	Female	FSLC	NE	Adamawa	Yola North	Nassarawo	Yes	APC	1-5 yrs	No			No		No		No		SA	SA	SD	A	SA	N	A	SA	SA	SD	A	SA	D	D	D	D	SA	A	D	SD	N	N	N	D	N	D	A
2024-05-19 11:53:12	36-45	Female	NCE/ND/TCII	NC	Nasarawa	Obi	Aududu	Yes	APC	6-10 yrs	Yes	PDP	Non Inclusion in Decision-making, Imposition of Candidates, Hijack of Party Structure	Yes	State Executive	No		Yes	Boards	SA	A	D	A	SA	A	A	SA	SA	SD	A	SA	N	D	SD	D	A	A	SD	D	D	A	A	D	N	D	A
2024-05-19 11:57:13	46-55	Male	HND/BSC/(FIRST DEGREE)	NC	Nasarawa	Toto	Katakpa	Yes	APC	6-10 yrs	No			Yes	State Executive	No		No		SA	A	D	A	SA	A	A	SA	SA	SD	A	SA	N	D	D	D	A	A	D	D	D	A	A	D	N	D	A
2024-05-19 12:02:16	18-25	Female	WAEC/NECO	NC	Nasarawa	Kokona	Garuku	Yes	APC	1-5 yrs	No			Yes	Ward Executive	No		No		SA	A	D	A	SA	N	A	A	SA	SD	A	A	SD	D	D	D	A	A	D	D	N	N	N	N	N	D	A
2024-05-19 12:07:06	26-35	Female	WAEC/NECO	NC	Nasarawa	Karu	Karshi 11	Yes	APC	1-5 yrs	No			Yes	Ward Executive	No		No		SA	A	D	A	SA	N	A	SA	SA	SD	A	A	N	D	D	D	A	A	D	D	N	N	N	N	D	D	A
2024-05-19 12:12:48	26-35	Female	FSLC	NC	Nasarawa	Lafia	Zanwa	Yes	APC	1-5 yrs	Yes	PDP	Imposition of Candidates	No		No		No		SA	A	D	A	SA	N	A	A	SA	SD	A	A	D	D	D	D	A	A	D	D	N	N	N	N	D	D	A
2024-05-19 12:17:08	36-45	Female	WAEC/NECO	NC	Nasarawa	Lafia	Chiroma	Yes	APC	1-5 yrs	No			No		No		No		SA	A	SD	A	SA	N	A	SA	SA	SD	A	A	D	D	D	D	A	A	D	SD	D	N	N	D	D	SD	A
2024-05-19 12:24:17	66 and above	Male	WAEC/NECO	NC	Nasarawa	Akwanga	Akwanga west	Yes	APC	1-5 yrs	Yes	PDP	Imposition of Candidates	No		No		No		SA	A	D	A	SA	N	A	SA	SA	D	A	SA	D	D	SD	D	SA	A	SD	D	N	N	N	D	D	SD	A
2024-05-19 12:29:49	36-45	Female	NCE/ND/TCII	NC	Nasarawa	Karu	Guruku	Yes	APC	6-10 yrs	No			Yes	State Executive	No		Yes	Adviser/Assistant	SA	SA	SD	A	SA	A	A	SA	SA	D	A	A	D	D	D	D	A	A	D	D	D	A	A	N	N	D	A
2024-05-19 12:34:29	36-45	Female	WAEC/NECO	NC	Nasarawa	Akwanga	Gudi	Yes	APC	1-5 yrs	No			No		No		No		SA	SA	D	A	SA	N	A	SA	SA	D	A	A	SD	D	D	D	A	A	D	SD	D	N	N	D	D	D	A
2024-05-19 12:39:55	46-55	Male	WAEC/NECO	NC	Nasarawa	Keffi	Angwan Iya 11	Yes	APC	1-5 yrs	No			No		No		No		SA	A	SD	A	SA	N	A	A	SA	SD	A	A	D	D	SD	D	SA	A	D	SD	D	N	N	D	N	SD	A
2024-05-19 15:42:43	36-45	Female	NCE/ND/TCII	SW	Delta	Sapele	Sapele Urban 111	Yes	PDP	6-10 yrs	No			Yes	LG Executive	Yes	Ward Councilor	Yes	Boards	SA	SA	D	A	SA	N	A	SA	SA	D	A	A	D	D	D	D	A	A	D	D	A	N	N	A	N	D	A
2024-05-19 15:52:36	46-55	Female	NCE/ND/TCII	SS	Delta	Ughelli South	Jeremi 11	Yes	PDP	6-10 yrs	Yes	APC	Imposition of Candidates, Hijack of Party Structure	Yes	LG Executive	No		No		SA	SA	D	A	SA	A	A	A	SA	D	A	A	N	D	SD	D	A	A	D	D	SA	A	A	A	N	N	A
2024-05-20 23:49:22	46-55	Female	HND/BSC/(FIRST DEGREE)	SS	Delta	Ethiope East	Agbona 11	Yes	PDP	6-10 yrs	Yes	APC	Imposition of Candidates, Hijack of Party Structure	Yes	LG Executive	No		No		SA	A	D	A	SA	A	A	A	SA	D	A	A	N	D	D	D	A	A	D	D	SA	N	N	A	N	SD	A
2024-05-21 08:51:42	26-35	Female	NCE/ND/TCII	SS	Delta	Ika North East	Umunede	Yes	PDP	6-10 yrs	Yes	APC	Imposition of Candidates	Yes	Ward Executive	No		No		SA	A	D	A	SA	N	A	SA	SA	D	A	A	SD	D	D	D	A	A	D	D	A	N	N	A	N	D	A
2024-05-21 08:59:45	18-25	Male	WAEC/NECO	SS	Delta	Ika North East	Akumazi	Yes	PDP	1-5 yrs	No			Yes	Ward Executive	No		No		SA	A	SD	A	SA	N	A	SA	SA	D	A	A	D	D	SD	D	A	A	D	D	A	N	N	A	N	D	A
2024-05-21 09:18:18	36-45	Male	HND/BSC/(FIRST DEGREE)	SS	Delta	Ethiope West	Jesse 111	Yes	PDP	6-10 yrs	No			Yes	Ward Executive	No		No		SA	A	SD	A	SA	N	A	SA	SA	D	A	A	D	D	SD	SD	A	A	D	D	SA	A	A	A	N	D	N
2024-05-21 09:29:43	66 and above	Female	POSTGRADUATE	SS	Delta	Aniocha North	Onicha Ugbo	Yes	APC	6-10 yrs	Yes	PDP	Imposition of Candidates	Yes	LG Executive	No		Yes	Boards	SA	A	N	A	SA	A	A	SA	SA	SD	A	A	N	D	SD	D	A	A	D	D	D	A	A	N	N	N	N
2024-05-21 09:40:32	26-35	Female	NCE/ND/TCII	SS	Delta	Bomadi	Kpakiama	Yes	APC	1-5 yrs	No			No		No		No		SA	A	D	A	SA	N	A	SA	SA	D	A	A	D	D	SD	D	A	A	D	D	N	N	N	N	D	N	A
2024-05-21 09:48:30	36-45	Male	WAEC/NECO	SS	Delta	Ethiope East	Agbona V111	Yes	APC	6-10 yrs	No			Yes	LG Executive	No		No		SA	SA	N	A	SA	N	A	A	SA	D	A	A	N	D	D	D	A	A	D	D	N	N	N	D	D	N	A
2024-05-21 09:58:52	26-35	Female	WAEC/NECO	SS	Delta	Patani	Abbari	Yes	APC	6-10 yrs	Yes	PDP	Imposition of Candidates	Yes	Ward Executive	No		No		SA	A	D	A	SA	D	A	SA	SA	D	A	A	N	D	D	D	A	A	D	D	N	N	N	N	N	D	A
2024-05-21 10:14:16	26-35	Female	WAEC/NECO	SS	Delta	Okpe	Orerokpe	Yes	PDP	6-10 yrs	No			No		No		Yes	Adviser/Assistant	SA	A	N	A	SA	D	N	A	A	D	A	A	N	D	D	D	A	A	D	D	A	N	N	A	N	N	A
2024-05-21 10:26:05	36-45	Female	HND/BSC/(FIRST DEGREE)	SS	Delta	Ughelli South	Ewu 11	Yes	APC	1-5 yrs	No			No		No		No		SA	A	D	A	SA	D	A	A	SA	D	A	A	D	D	D	D	A	A	D	D	N	N	N	N	N	D	A
2024-05-21 10:37:19	18-25	Male	WAEC/NECO	SS	Delta	Patani	Patani 111	Yes	PDP	6-10 yrs	No			No		Yes	Ward Councilor	Yes	Adviser/Assistant	SA	SA	D	A	SA	A	A	SA	SA	D	A	A	D	D	D	D	A	A	D	D	A	N	N	A	N	D	A
2024-05-21 10:58:54	46-55	Male	POSTGRADUATE	SS	Delta	Uvwie	Effurun 11	Yes	PDP	6-10 yrs	No			No		No		Yes	LGC Supervisor	SA	A			SA	N	A	SA	SA	D	A	A	D	D	D	D	A	A	D	D	A	A	A	A	N		A
2024-05-21 11:03:49	36-45	Female	HND/BSC/(FIRST DEGREE)	SS	Delta	Oshimili North	Ibusa 111	Yes	APC	1-5 yrs	No			No		No		No		SA	SA	D	A	SA	D	N	A	A	D	A	A	D	D	D	D	A	A	D	D	N	N	N	D	D	N	A
2024-05-21 11:21:08	36-45	Male	HND/BSC/(FIRST DEGREE)	SS	Delta	Udu	Udu 111	Yes	PDP	6-10 yrs	No			No		No		Yes	Boards	SA	A	D	A	SA	A	A	SA	SA	D	A	A	D	D	D	D	A	A	D	D	A	A	N	A	N	N	A
2024-05-21 11:30:18	26-35	Female	WAEC/NECO	SS	Delta	Ndokwa West	Abbi 11	Yes	APC	1-5 yrs	No			No		No		No		SA	A	D	A	SA	D	A	SA	SA	D	A	A	D	D	D	D	A	A	D	D	D	N	N	D	N	N	A
2024-05-21 11:43:35	46-55	Female	HND/BSC/(FIRST DEGREE)	SS	Delta	Oshimili North	Illah	Yes	PDP	11-15 yrs	Yes	APC	Imposition of Candidates, Hijack of Party Structure	No		No		Yes	Cabinet/Exco	SA	SA	D	A	SA	A	A	SA	SA	D	A	A	D	D	D	D	A	A	D	D	A	A	A	A	N	D	A
2024-05-22 21:26:35	36-45	Male	NCE/ND/TCII	SS	Delta	Warri South West	Orere	Yes	PDP	6-10 yrs	No			No		No		Yes	Adviser/Assistant	SA	A	D	A	SA	N	A	A	SA	D	A	A	N	D	D	D	A	A	D	D	A	A	A	A	N	D	A
2024-05-22 21:51:03	26-35	Female	WAEC/NECO	SS	Delta	Oshimili South	Umuezie	Yes	PDP	6-10 yrs	Yes	APC	Imposition of Candidates	No		No		No		SA	SA	D	A	SA	N	A	SA	SA	D	A	A	D	D	SD	D	A	A	D	D	A	N	N	A	N	D	A
2024-05-22 21:55:35	56-65	Female	HND/BSC/(FIRST DEGREE)	SS	Delta	Ukwuani	Obiaruku 1	Yes	APC	6-10 yrs	Yes	PDP	Hijack of Party Structure	No		Yes	Ward Councilor	Yes	Adviser/Assistant	SA	SA	D	A	SA	N	A	A	SA	D	A	A	SD	D	SD	D	A	A	D	D	N	N	N	D	D	D	A
2024-05-22 22:00:33	66 and above	Male	HND/BSC/(FIRST DEGREE)	SS	Delta	Ughelli North	Ughelli 1	Yes	APC	1-5 yrs	Yes	PDP	Imposition of Candidates	No		No		Yes	Boards	SA	SA	D	A	SA	A	A	A	SA	D	A	A	SD	D	SD	D	A	A	D	D	N	N	N	D	D	D	A
2024-05-22 22:06:20	46-55	Male	WAEC/NECO	SS	Delta	Isoko North	Ozoro 111	Yes	APC	1-5 yrs	No			No		No		No		SA	A	D	A	SA	N	A	SA	SA	D	A	A	SD	D	SD	D	A	A	D	D	D	N	N	D	D	D	A
2024-05-22 22:11:00	18-25	Male	WAEC/NECO	SS	Delta	Ndokwa East	Olomoro	Yes	PDP	11-15 yrs	No			No		No		Yes	Boards	SA	SA	SD	A	SA	N	A	A	SA	D	A	A	N	D	SD	D	A	A	D	D	A	N	A	A	N	D	A
2024-05-22 22:41:02	56-65	Male	HND/BSC/(FIRST DEGREE)	NC	Nasarawa	Doma	Galadima	Yes	PDP	16+ yrs				No		Yes	Senator			SA	SA	N	A	SA	A	A	SA	SA	N	A	N	N	N	N	N	D	A	N	N	SA	A	A	A	A	N	A
2024-05-22 22:49:03	56-65	Male	HND/BSC/(FIRST DEGREE)	NC	Nasarawa	Akwanga	Kwaje Kwanje	Yes	PDP	11-15 yrs	No			No		Yes	Senator	No		SA	SA	A	A	SA	SA	A	SA	SA	N	N	N	D	N	N	N	D	A	N	N	SA	SA	SA	A	A	A	A
2024-05-29 15:10:39	36-45	Male	HND/BSC/(FIRST DEGREE)	NC	Nasarawa	Obi	Obi	Yes	PDP	11-15 yrs	No			No		Yes	State Assembly	Yes	Boards	SA	A	N	A	SA	SA	SA	SA	SA	N	A	N	N	D	N	N	D	A	N	N	SA	A	SA	SA	N	N	N
2024-05-29 16:09:54	46-55	Male	HND/BSC/(FIRST DEGREE)	NC	Nasarawa	Keana	Iwagu	Yes	PDP	11-15 yrs	No			Yes	State Executive	Yes	MFR	Yes	Adviser/Assistant	SA	A	A	A	SA	SA	A	SA	SA	N	A	N	D	A	N	A	D	A	N	N	SA	SA	SA	SA	A	A	A
2024-05-29 16:23:22	36-45	Male	HND/BSC/(FIRST DEGREE)	NC	Nasarawa	Wamba	Wamba East	Yes	PDP	6-10 yrs	No			No		Yes	MFR	No		SA	SA	A	A	SA	SA	A	SA	A	N	A	N	N	N	N	N	D	A	N	A	SA	SA	SA	SA	A	N	A
2024-05-30 16:50:37	26-35	Female	NCE/ND/TCII	SE	Imo	Owerri Municipal	Ikenegbu 11	Yes	APC	1-5 yrs	No			No		No		No		SA	A	D	A	SA	D	A	A	A	D	A	A	SD	D	D	D	A	A	SD	D	N	N	N	D	D	D	N
2024-05-30 16:59:30	36-45	Male	HND/BSC/(FIRST DEGREE)	SE	Imo	Orsu	Amaruru	Yes	APC	6-10 yrs	Yes	PDP	Factionalization	No		Yes	Ward Councilor	Yes	Adviser/Assistant	SA	A	N	A	SA	D	A	SA	SA	SD	A	A	D	D	SD	D	A	A	D	D	D	A	A	D	D	D	A
2024-05-30 17:08:37	46-55	Female	HND/BSC/(FIRST DEGREE)	SE	Imo	Orlu	Amaifeke	Yes	APC	6-10 yrs	Yes	PDP	Imposition of Candidates	No		Yes	State Assembly	Yes	Adviser/Assistant	SA	A	N	A	SA	A	A	SA	SA	D	A	A	D	D	SD	D	A	A	D	D	N	A	N	N	D	D	A
2024-05-30 17:21:00	36-45	Male	HND/BSC/(FIRST DEGREE)	SE	Imo	Aboh Mbaise	Mbutu	Yes	APC	6-10 yrs	No			Yes	LG Executive			Yes	Boards	SA	A	D	A	SA	N	A	A	SA	D	A	A	D	D	D	D	A	A	D	SD	N	A	A	N	N	N	A
2024-05-30 17:27:41	36-45	Female	NCE/ND/TCII	SE	Imo	Ehime Mbano	Umueze 11	Yes	APC	6-10 yrs	No			No		No		Yes	Adviser/Assistant	SA	A	D	A	SA	N	A	A	A	SD	A	A	SD	D	SD	D	A	A	D	D	N	N	N	N	D	N	N
2024-05-30 19:45:48	36-45	Female	HND/BSC/(FIRST DEGREE)	SE	Imo	Ahiazu Mbaise	Umunumo 11	Yes	PDP	11-15 yrs	No			Yes	State Executive	Yes	Ward Councilor	Yes	Adviser/Assistant	SA	A	D	A	SA	A	A	A	SA	D	A	A	D	D	SD	D	A	A	SD	SD	A	A	A	A	N	N	A
2024-05-30 19:51:18	26-35	Female	NCE/ND/TCII	SE	Imo	Ideato South	Ntueke	Yes	PDP	6-10 yrs	No			No		No		No		SA	SA	D	A	SA	D	A	A	SA	SD	A	A	SD	D	SD	D	A	A	D	SD	A	N	N	A	N	D	A
2024-05-30 20:00:02	66 and above	Male	NCE/ND/TCII	SE	Imo	Ihitte/Uboma	Amakohia	Yes	PDP	11-15 yrs	No			No		Yes	Ward Councilor	Yes	Boards	SA	SA	SD	A	SA	N	A	A	SA	D	A	A	D	D	SD	D	A	A	SD	SD	A	A	N	A	N	SD	A
2024-05-30 20:06:02	18-25	Male	HND/BSC/(FIRST DEGREE)	SE	Imo	Ikeduru	Iho	Yes	APC	1-5 yrs	No			No		No		No		SA	SA	D	A	SA	D	A	A	SA	SD	A	A	SD	D	D	D	A	A	SD	D	N	N	N	N	N	D	A
2024-05-30 20:13:02	36-45	Female	HND/BSC/(FIRST DEGREE)	SE	Imo	Isu	Isu Njaba 111	Yes	PDP	6-10 yrs	No			Yes	LG Executive	No		Yes	Adviser/Assistant	SA	SA	D	A	SA	N	A	A	SA	SD	A	A	D	D	D	D	A	A	D	D	A	N	N	A	N	D	A
2024-05-30 20:23:30	46-55	Male	HND/BSC/(FIRST DEGREE)	SE	Imo	Ngor Okpalla	Ozuzu	Yes	PDP	11-15 yrs	No			No		Yes	Ward Councilor	Yes	Cabinet/Exco	SA	SA	D	A	SA	N	A	SA	SA	D	A	A	D	D	SD	D	A	A	SD	SD	SA	A	A	A	N	D	A
2024-05-30 20:34:18	46-55	Female	NCE/ND/TCII	SE	Imo	Nkwerre	Omaopara	Yes	APC	1-5 yrs	Yes	PDP	Factionalization, Hijack of Party Structure	No		No		Yes	Boards	SA	A	D	A	SA	N	A	A	SA	D	A	A	SD	D	D	D	A	A	D	D	N	N	N	N	D	D	A
2024-05-30 20:39:12	26-35	Female	HND/BSC/(FIRST DEGREE)	SE	Imo	Nwangele	Umuozu	Yes	APC	1-5 yrs	No			No		No		No		SA	A	SD	A	SA	D	N	A	SA	SD	N	A	SD	D	SD	D	A	A	SD	SD	N	N	N	N	D	D	A
2024-05-30 20:47:56	36-45	Female	HND/BSC/(FIRST DEGREE)	SE	Imo	Njaba	Atta 11	Yes	PDP	1-5 yrs	Yes	APC	Factionalization, Non Inclusion in Decision-making, Imposition of Candidates, Hijack of Party Structure	No		No		Yes	Boards	SA	SA	D	A	SA	N	A	A	SA	SD	A	A	SD	D	SD	D	A	A	D	SD	A	A	A	A	N	D	A
2024-05-30 21:03:02	56-65	Male	POSTGRADUATE	SE	Imo	Obowo	Avutu	Yes	PDP	6-10 yrs	Yes	APC	Factionalization, Imposition of Candidates	No		No		No		SA	A	D	A	SA	N	A	A	SA	SD	A	A	D	D	SD	D	A	A	SD	SD	A	A	N	A	N	D	A
2024-05-30 21:11:51	26-35	Female	HND/BSC/(FIRST DEGREE)	SE	Imo	Ohaji/Egbema	Egbema A	Yes	PDP	1-5 yrs	No			No		No		No		SA	SA	D	A	SA	N	N	A	SA	D	A	A	D	D	SD	D	A	D	SD	SD	A	N	N	A	N	D	A
2024-05-30 21:41:44	36-45	Female	HND/BSC/(FIRST DEGREE)	SE	Imo	Onuimo	Eziama	Yes	APC	6-10 yrs	No			Yes	LG Executive	No		Yes	Boards	SA	A	D	A	SA	N	A	A	SA	D	A	A	D	D	SD	D	A	A	SD	SD	N	N	N	D	D	D	A
2024-05-30 21:58:21	26-35	Female	HND/BSC/(FIRST DEGREE)	SE	Imo	Okigwe	Ihube	Yes	APC	6-10 yrs	No			No		No		Yes	Boards	SA	SA	D	A	SA	N	A	SA	SA	D	A	A	D	D	SD	D	A	A	D	SD	N	N	N	D	D	N	A
2024-05-30 22:08:57	46-55	Female	HND/BSC/(FIRST DEGREE)	SE	Imo	Oguta	Awa	Yes	APC	1-5 yrs	No			Yes	State Executive	No	President	No		SA	SA	D	A	SA	A	A	SA	SA	D	A	A	D	D	D	D	A	A	D	SD	N	N	N	D	D	D	A
2024-05-30 22:19:53	36-45	Female	HND/BSC/(FIRST DEGREE)	SE	Imo	Oru East	Amiri	Yes	APC	6-10 yrs	No			Yes	State Executive	No		Yes	Boards	SA	A	D	A	SA	A	A	SA	SA	D	SA	A	D	D	SD	D	A	A	D	SD	N	A	A	N	D	D	A
2024-05-30 23:12:12	18-25	Female	NCE/ND/TCII	SE	Imo	Oru West	Ozara	Yes	APC	1-5 yrs	No			Yes	Ward Executive	No		No		SA	A	SD	A	SA	N	A	A	SA	SD	A	SA	SD	SD	SD	SD	SA	A	SD	SD	N	N	N	N	D	SD	A
2024-05-30 23:17:51	26-35	Female	WAEC/NECO	SE	Imo	Owerri North	Egbu	Yes	APC	1-5 yrs	No			Yes	Ward Executive	No		No		SA	SA	SD	A	SA	D	A	A	SA	SD	A	A	SD	D	D	D	A	A	SD	SD	N	N	N	D	D	SD	SA
2024-05-30 23:26:12	36-45	Male	HND/BSC/(FIRST DEGREE)	SE	Imo	Owerri West	Nekede	Yes	APC	6-10 yrs	No			Yes	State Executive	No		Yes	Boards	SA	SA	D	A	SA	A	A	SA	SA	SD	A	A	D	D	SD	D	A	A	D	SD	N	A	A	N	N	D	A
2024-05-30 23:35:00	46-55	Male	HND/BSC/(FIRST DEGREE)	SE	Imo	Oguta	Izombe	Yes	APC	6-10 yrs	Yes	PDP	Factionalization	Yes	LG Executive	Yes	Ward Councilor	No		SA	A	D	A	SA	N	A	A	SA	D	A	A	D	D	D	D	A	D	SD	SD	N	N	N	N	D	D	A
2024-05-30 23:43:19	26-35	Female	NCE/ND/TCII	SE	Imo	Ideato North	Isiokpa	Yes	APC	1-5 yrs	No			Yes	LG Executive	No		No		SA	SA	D	A	SA	N	A	A	SA	SD	A	A	D	D	SD	D	A	A	SD	SD	N	A	N	D	D	D	A
2024-05-31 06:00:00	36-45	Female	HND/BSC/(FIRST DEGREE)	SE	Imo	Ahiazu Mbaise	Obohia Ekwerazu	Yes	APC	6-10 yrs	No			Yes	Ward Executive	No		No		SA	A	SD	A	SA	N	A	A	SA	SD	A	A	SD	SD	SD	SD	A	A	D	SD	D	N	N	D	D	D	A
2024-05-31 06:05:30	26-35	Female	NCE/ND/TCII	SE	Imo	Ezinihitte Mbaise	Onicha 1	Yes	APC	1-5 yrs	No			Yes	Ward Executive	No		No		SA	SA	D	A	SA	D	A	A	SA	SD	A	A	SD	SD	SD	SD	A	A	SD	SD	N	N	N	D	D	SD	A
2024-05-31 06:11:40	26-35	Female	HND/BSC/(FIRST DEGREE)	SE	Imo	Ehime Mbano	Nzerem Ikpe	Yes	PDP	1-5 yrs	No			Yes	Ward Executive	No		No		SA	SA	D	A	SA	D	A	A	SA	D	A	A	SD	SD	SD	SD	A	A	D	SD	A	N	N	A	N	D	A
2024-05-31 06:16:58	36-45	Male	HND/BSC/(FIRST DEGREE)	SE	Imo	Ideato South	Dikenafai	Yes	APC	1-5 yrs	Yes	PDP	Factionalization, Hijack of Party Structure	Yes	LG Executive	No		No		SA	A	D	A	SA	N	A	A	SA	D	A	A	SD	D	D	D	A	D	D	SD	N	N	N	D	D	D	A
2024-05-31 06:23:15	36-45	Male	HND/BSC/(FIRST DEGREE)	SE	Imo	Ihitte/Uboma	Okata	Yes	APC	6-10 yrs	No			Yes	State Executive	No		Yes	Boards	SA	SA	D	A	SA	N	A	SA	SA	D	A	A	N	N	D	N	A	A	D	SD	N	A	A	D	N	D	A
2024-05-31 06:30:10	26-35	Female	NCE/ND/TCII	SE	Imo	Ngor Okpala	Eziama/Okpala	Yes	APC	1-5 yrs	No			No		No		Yes	Boards	SA	A	D	A	SA	D	A	A	SA	D	A	A	SD	SD	SD	SD	A	A	D	SD	SD	N	N	D	D	D	A
2024-05-31 06:36:45	46-55	Female	HND/BSC/(FIRST DEGREE)	SE	Imo	Obowo	Umunachi	Yes	APC	6-10 yrs	No			No		No		No		SA	A	D	A	SA	D	A	A	SA	D	A	A	D	SD	SD	SD	A	A	D	SD	N	N	N	D	D	D	A
2024-05-31 08:44:53	36-45	Female	HND/BSC/(FIRST DEGREE)	SE	Imo	Ideato North	Izuogu	Yes	PDP	11-15 yrs	No			Yes	State Executive	No		Yes	Adviser/Assistant	SA	SA	N	A	SA	A	A	SA	SA	D	A	A	N	D	SD	D	A	A	D	SD	SA	A	A	SA	N	N	A
2024-05-31 08:53:37	46-55	Female	HND/BSC/(FIRST DEGREE)	SE	Imo	Ikeduru	Amaimo	Yes	PDP	6-10 yrs	Yes	APC	Factionalization, Imposition of Candidates, Hijack of Party Structure	Yes	State Executive	No	State Assembly	No		SA	SA	D	A	SA	A	A	SA	SA	D	A	A	N	D	SD	D	A	A	D	SD	SA	A	A	A	N	D	A
2024-05-31 09:02:03	18-25	Female	NCE/ND/TCII	SE	Imo	Isiala Mbano	Ogbor	Yes	PDP	1-5 yrs	No			Yes	Ward Executive	No		No		SA	A	D	A	SA	D	A	A	SA	D	A	A	SD	SD	SD	SD	A	A	D	SD	SA	N	N	A	N	D	A
2024-05-31 09:08:20	46-55	Male	POSTGRADUATE	SE	Imo	Mbaitolu	Ogbaku	Yes	PDP	11-15 yrs	No			Yes	State Executive	Yes	Ward Councilor	Yes	Boards	SA	SA	N	A	SA	A	A	SA	SA	D	A	A	N	D	SD	D	A	A	SD	SD	SA	A	A	A	N	N	A
2024-05-31 09:15:09	26-35	Female	NCE/ND/TCII	SE	Imo	Nkwerre	Owerre Nkworji	Yes	PDP	6-10 yrs	No			Yes	LG Executive	Yes	Ward Councilor	No		SA	A	D	A	SA	N	A	SA	SA	D	A	A	D	SD	SD	SD	A	A	D	SD	A	N	N	A	N	D	A
2024-05-31 09:29:46	36-45	Female	NCE/ND/TCII	SE	Imo	Oru West	Amagu	Yes	PDP	6-10 yrs	No			Yes	Ward Executive	No		No		SA	SA	D	A	SA	D	A	A	SA	SD	A	A	SD	SD	SD	SD	SA	A	D	SD	A	N	N	A	N	D	A
2024-05-31 09:35:19	56-65	Male	POSTGRADUATE	SE	Imo	Owerri West	Obinze	Yes	PDP	6-10 yrs	No			Yes	LG Executive	No		No		SA	A	D	A	SA	N	A	SA	SA	SD	A	A	D	D	SD	D	A	A	D	SD	SA	N	N	A	N	N	A
2024-05-31 14:07:45	66 and above	Male	HND/BSC/(FIRST DEGREE)	SE	Imo	Aboh Mbaise	Ibeku	Yes	PDP	16+ yrs	No			No		Yes	Ward Councilor	Yes	Cabinet/Exco	SA	SA	N	A	SA	A	A	SA	SA	D	A	A	SD	D	SD	D	A	A	D	SD	SA	SA	SA	A	N	N	A
2024-05-31 14:20:36	18-25	Female	NCE/ND/TCII	SE	Imo	Ezinihitte Mbaise	Eziudo	Yes	PDP	1-5 yrs	No			Yes	Ward Executive	No		No		SA	A	N	A	SA	D	A	A	SA	D	A	A	SD	SD	SD	SD	A	A	D	SD	A	N	N	A	N	D	A
2024-05-31 14:35:23	26-35	Female	NCE/ND/TCII	SE	Imo	Nwangele	Umuozu	Yes	PDP	6-10 yrs	Yes	APC	Factionalization, Hijack of Party Structure	Yes	LG Executive	No		Yes	LGA Supervisor	SA	SA	D	A	SA	N	A	SA	SA	D	A	A	D	D	SD	D	A	A	D	SD	A	N	N	A	N	D	A
2024-05-31 14:43:31	26-35	Female	HND/BSC/(FIRST DEGREE)	SE	Imo	Ahiazu Mbaise	Mpam	Yes	PDP	6-10 yrs	Yes	APC	Factionalization, Hijack of Party Structure	Yes	Ward Executive	No		No		SA	A	D	N	A	D	N	A	A	D	A	A	D	D	D	D	A	D	SD	D	A	N	N	A	N	N	A
2024-06-03 00:26:21	46-55	Female	WAEC/NECO	SE	Imo	Okigwe	Aguobu	Yes	PDP	11-15 yrs	No			No		No		Yes	Adviser/Assistant	SA	SA	N	A	A	N	A	A	A	D	A	A	N	D	SD	D	A	A	D	D	A	N	N	A	N	N	A
2024-06-03 00:32:50	26-35	Female	NCE/ND/TCII	SE	Imo	Onuimo	Okwelle 11	Yes	PDP	1-5 yrs	Yes	APC	Factionalization, Hijack of Party Structure	No		No		No		SA	SA	N	A	A	N	A	SA	A	D	N	N	D	D	SD	D	A	A	SD	D	A	N	N	A	N	N	A
2024-06-03 00:40:47	18-25	Male	WAEC/NECO	SE	Imo	Oguta	Obidi/Aro	Yes	PDP	1-5 yrs	No			No		No		No		SA	A	N	A	SA	D	A	SA	A	N	N	A	N	D	SD	D	A	A	D	D	A	D	D	A	N	N	A
2024-06-03 01:57:24	36-45	Female	HND/BSC/(FIRST DEGREE)	SW	Lagos	Surulere	Aguda	Yes	APC	6-10 yrs	No			Yes	State Executive	No		Yes	Boards	SA	A	N	A	SA	A	A	A	SA	N	A	N	N	N	D	D	A	A	D	D	N	A	A	N	N	N	A
2024-06-03 02:05:29	46-55	Male	HND/BSC/(FIRST DEGREE)	SW	Lagos	Amuwo Odofin	Ibeshe	Yes	APC	6-10 yrs	No			No		No		Yes	Cabinet/Exco	SA	SA	N	A	A	A	A	A	A	N	A	A	N	D	D	D	N	A	D	N	N	A	A	N	N	N	A
2024-06-03 02:20:14	36-45	Female	HND/BSC/(FIRST DEGREE)	SW	Lagos	Eti-Osa	Obalende	Yes	APC	6-10 yrs	No			No		No		No		SA	SA	N	A	A	N	A	SA	A	N	N	N	D	D	D	N	A	A	D	D	N	A	N	N	N	N	A
2024-06-03 02:59:23	36-45	Female	HND/BSC/(FIRST DEGREE)	SW	Lagos	Ikeja	Onigbongbon	Yes	APC	6-10 yrs	No			Yes	State Executive	No		Yes	Cabinet/Exco	SA	SA	N	A	A	A	A	A	A	D	A	A	N	D	D	D	A	A	D	N	N	A	A	N	N	N	A
2024-06-03 03:09:57	56-65	Male	HND/BSC/(FIRST DEGREE)	SW	Lagos	Somolu	Onipanu	Yes	APC	6-10 yrs	No			Yes	State Executive	No		Yes	Cabinet/Exco	SA	SA	N	A	A	A	A	SA	A	D	A	A	N	N	N	N	A	A	D	D	N	A	A	N	N	N	A
2024-06-03 03:39:57	66 and above	Male	HND/BSC/(FIRST DEGREE)	SW	Lagos	Oshodi/Isolo	Okota	Yes	APC	6-10 yrs	Yes	PDP	Factionalization	Yes	State Executive	Yes	Ward Councilor	Yes	Boards	SA	SA	N	A	A	A	A	SA	A	D	A	A	N	D	D	D	A	A	N	D	N	A	A	N	N	N	A
2024-06-03 07:22:21	26-35	Female	HND/BSC/(FIRST DEGREE)	SW	Lagos	Agege	Orile Agege/Oko Oba	Yes	APC	1-5 yrs	No			Yes	LG Executive	No		No		SA	A	D	A	A	N	A	A	A	D	A	A	D	D	D	D	A	A	D	D	N	N	N	D	D	D	A
2024-06-06 11:12:47	36-45	Female	HND/BSC/(FIRST DEGREE)	SW	Lagos	Kosofe	Anthony/Ajao Estate/Mende/Maryland	Yes	APC	6-10 yrs	No			No		No		Yes	Adviser/Assistant	SA	SA	N	A	SA	N	A	A	SA	A	N	A	N	D	D	SD	D	A	A	D	D	N	A	A	N	N	A
2024-06-06 11:18:57	26-35	Male	HND/BSC/(FIRST DEGREE)	SW	Lagos	Ojo	Okokomaiko	Yes	APC	1-5 yrs	No			No		No		No		SA	A	N	A	SA	N	N	A	SA	A	D	A	A	N	D	D	D	A	A	D	D	N	D	D	N	N	A
2024-06-06 11:31:39	46-55	Male	NCE/ND/TCII	SW	Lagos	Somolu	Igbobi/Fadeyi	Yes	APC	6-10 yrs	No			No		Yes	Ward Councilor	Yes	Boards	SA	A	D	A	SA	N	A	A	SA	SA	N	A	N	N	D	N	N	A	A	D	D	N	N	N	D	D	A
2024-06-06 11:36:29	26-35	Female	HND/BSC/(FIRST DEGREE)	SW	Lagos	Ajeromi/Ifelodun	Olodi	Yes	APC	1-5 yrs	No			Yes	Ward Executive	No		No		SA	SA	N	A	A	N	N	A	SA	SA	SD	A	A	D	D	SD	D	A	A	D	D	N	N	N	D	D	A
2024-06-06 11:43:00	36-45	Female	NCE/ND/TCII	SW	Lagos	Alimosho	Ikotun/Ijegun	Yes	APC	6-10 yrs	No			Yes	LG Executive	No		Yes	Boards	SA	SA	N	A	SA	N	N	A	A	A	D	A	A	N	D	D	D	A	A	D	D	N	A	A	D	N	A
2024-06-06 11:51:30	46-55	Male	HND/BSC/(FIRST DEGREE)	SW	Lagos	Ibeku Lekki	Ibeju 11	Yes	APC	6-10 yrs	No			Yes	State Executive	No		Yes	Boards	SA	SA	N	A	SA	N	A	A	SA	SA	N	A	A	N	D	D	D	A	A	D	D	N	A	A	N	D	A
2024-06-06 11:59:55	26-35	Female	NCE/ND/TCII	SW	Lagos	Epe	Ilara	Yes	APC	1-5 yrs	No			Yes	Ward Executive	No		No		SA	A	N	A	SA	N	N	A	SA	A	D	A	A	N	D	D	N	A	A	D	D	N	N	N	N	N	N
2024-06-06 12:07:59	26-35	Male	HND/BSC/(FIRST DEGREE)	SW	Lagos	Badagary	Ajara	Yes	APC	6-10 yrs	No			Yes	LG Executive	No		Yes	Adviser/Assistant	SA	SA	N	A	SA	N	N	A	SA	A	SD	A	A	N	D	SD	D	A	A	SD	D	N	N	N	D	D	A
2024-06-06 12:16:00	56-65	Male	HND/BSC/(FIRST DEGREE)	SW	Lagos	Apapa	Apapa 1V	Yes	APC	6-10 yrs	No			No		No		Yes	Boards	SA	SA	N	A	SA	N	A	A	SA	A	SD	A	A	N	D	SD	D	A	A	D	D	N	A	A	N	N	A
2024-06-06 12:21:34	36-45	Female	NCE/ND/TCII	SW	Lagos	Ifako-Ijaye	Iju Isaga	Yes	APC	6-10 yrs	No			Yes	LG Executive	No		No		SA	A	D	A	SA	D	N	A	SA	SA	SD	A	A	D	D	SD	D	A	A	D	D	N	A	A	N	N	A
2024-06-06 12:28:20	26-35	Female	HND/BSC/(FIRST DEGREE)	SW	Lagos	Mushin	Itire	Yes	APC	1-5 yrs	No			No		No		No		SA	SA	N	A	A	N	N	A	SA	A	D	A	A	N	D	SD	D	A	A	SD	SD	N	N	N	N	N	A
2024-06-06 12:50:41	46-55	Male	HND/BSC/(FIRST DEGREE)	SW	Lagos	Lagos Mainland	Yaba/Igbobi	Yes	APC	6-10 yrs	No			No		No		Yes	Cabinet/Exco	SA	SA	D	A	A	D	A	A	SA	A	SD	A	A	N	D	SD	D	A	A	D	SD	N	A	A	N	N	SA
2024-06-06 12:58:29	18-25	Male	HND/BSC/(FIRST DEGREE)	SW	Lagos	Lagos Island	Onikan	Yes	APC	1-5 yrs	No			Yes	Ward Executive	No		No		SA	A	N	A	SA	N	N	A	A	SA	SD	A	A	N	D	D	D	N	A	SD	SD	D	N	N	D	D	SA
2024-06-06 13:14:07	36-45	Female	HND/BSC/(FIRST DEGREE)	SW	Lagos	Ikorodu	Iselle 111	Yes	APC	6-10 yrs	No			Yes	Ward Executive	No		Yes	Boards	SA	SA	SD	SA	SA	SD	D	A	A	SA	SD	A	A	SD	SD	SD	SD	SA	A	SD	SD	D	N	N	D	N	A
2024-06-06 13:19:42	18-25	Female	WAEC/NECO	SW	Lagos	Agege	Oyewole/Papa Ashafa	Yes	APC	1-5 yrs	No			No		No		No		SA	SA	N	A	SA	N	D	A	A	A	SD	A	A	N	D	D	D	A	A	SD	D	N	N	N	N	N	A
2024-06-06 13:25:08	46-55	Female	NCE/ND/TCII	SW	Lagos	Ibeju Lekki	Lekki 11	Yes	APC	6-10 yrs	Yes	PDP	Imposition of Candidates, Hijack of Party Structure	No		No		No		SA	A	D	A	SA	D	N	A	SA	SA	SD	A	A	D	D	D	D	A	A	SD	SD	D	A	A	D	D	A
2024-06-06 13:30:38	46-55	Male	HND/BSC/(FIRST DEGREE)	SW	Lagos	Alimosho	Ipaja North	Yes	APC	6-10 yrs	No			No		No		Yes	Adviser/Assistant	SA	SA	N	A	SA	N	A	A	SA	SA	D	A	A	N	N	N	N	A	A	D	SD	D	A	A	D	D	A
2024-06-06 21:51:13	36-45	Female	HND/BSC/(FIRST DEGREE)	SW	Lagos	Ojo	Ajangbadi	Yes	PDP	6-10 yrs	No			Yes	State Executive	No		No		SA	SA	D	SA	SA	N	A	A	SA	SA	SD	A	A	N	D	SD	D	A	A	SD	SD	SA	A	A	A	N	A
2024-06-06 21:57:34	26-35	Female	HND/BSC/(FIRST DEGREE)	SW	Lagos	Ajeromi-Ifelodun	Wilmer	Yes	PDP	1-5 yrs	No			Yes	Ward Executive	No		No		SA	SA	SD	A	SA	N	D	A	A	SA	SD	A	A	SD	D	SD	D	A	A	SD	SD	A	N	N	A	N	A
2024-06-06 22:03:19	18-25	Female	NCE/ND/TCII	SW	Lagos	Surulere	Adeniran/Ogunsanya	Yes	PDP	1-5 yrs	No			No		No		No		SA	A	N	A	SA	N	D	N	A	SA	SD	A	A	N	N	SD	N	A	A	D	D	A	D	N	A	N	A
2024-06-06 22:10:18	36-45	Female	HND/BSC/(FIRST DEGREE)	SW	Lagos	Amuwo Odofin	Festac 111	Yes	PDP	1-5 yrs	Yes	APC	Non Inclusion in Decision-making, Imposition of Candidates	No		No		No		SA	SA	D	A	SA	N	A	A	SA	A	D	A	A	SD	D	SD	D	A	A	D	D	A	N	N	A	N	SA
2024-06-06 22:23:02	26-35	Female	HND/BSC/(FIRST DEGREE)	SW	Lagos	Eti-Osa	Ikoyi 11	Yes	PDP	6-10 yrs	No			Yes	Ward Executive	No		No		SA	SA	D	A	SA	N	A	A	SA	SA	D	A	A	D	D	SD	D	A	A	SD	SD	A	A	N	A	N	A
2024-06-07 14:57:48	26-35	Male	HND/BSC/(FIRST DEGREE)	SW	Lagos	Kosofe	Ojota/Ogudu	Yes	PDP	6-10 yrs	No			Yes	LG Executive	No		No		SA	SA	D	A	SA	N	N	A	SA	SA	D	A	A	SD	D	SD	D	A	A	SD	D	A	N	N	A	N	A
2024-06-07 15:04:32	46-55	Female	HND/BSC/(FIRST DEGREE)	SW	Lagos	Alimosho	Shasha/Akowonjo	Yes	PDP	6-10 yrs	No			Yes	State Executive	No		No		SA	SA	N	SA	SA	N	A	A	SA	SA	D	A	A	N	D	SD	D	A	A	D	D	A	A	A	SA	N	A
2024-06-07 15:13:34	26-35	Female	HND/BSC/(FIRST DEGREE)	SW	Lagos	Agege	Okekoto	Yes	PDP	1-5 yrs	No			Yes	Ward Executive	No		No		SA	A	SD	A	SA	N	N	A	SA	A	SD	A	A	SD	D	SD	D	A	A	SD	SD	SA	D	N	A	N	A
2024-06-07 15:28:36	46-55	Male	POSTGRADUATE	SW	Lagos	Ikeja	Ojodu/Agidingbi/Omole	Yes	PDP	11-15 yrs	No			No		No		No		SA	SA	A	A	SA	N	N	A	SA	SA	D	N	D	N	N	SD	D	A	A	A	SD	SA	A	N	A	N	A
2024-06-07 15:39:37	26-35	Female	NCE/ND/TCII	SW	Lagos	Ibeju Lekki	Lekki 1	Yes	PDP	1-5 yrs	No			No		No		No		SA	SA	N	A	SA	D	N	A	A	SA	D	A	A	SD	D	SD	D	A	A	D	SD	A	N	N	A	N	A
2024-06-07 15:45:42	26-35	Female	NCE/ND/TCII	SW	Lagos	Epe	Ejirin	Yes	PDP	1-5 yrs	No			Yes	Ward Executive	No		No		SA	SA	D	A	SA	N	N	A	SA	SA	SD	A	A	D	D	SD	D	N	A	SD	SD	A	N	N	A	N	A
2024-06-07 15:54:06	36-45	Female	HND/BSC/(FIRST DEGREE)	SW	Lagos	Ifako-Ijaye	Ijaiye/Ojokoro	Yes	PDP	6-10 yrs	Yes	APC	Imposition of Candidates	No		No		No		SA	SA	N	A	A	N	N	A	A	A	D	A	A	N	D	SD	D	A	D	SD	SD	A	A	A	A	N	A
2024-06-07 19:21:12	36-45	Male	WAEC/NECO	SW	Lagos	Somolu	Bajulaiye	Yes	PDP	6-10 yrs	No			No		No		No		SA	A	N	A	SA	N	N	A	SA	SA	N	A	A	N	D	SD	D	N	A	SD	D	SA	A	A	SA	A	A
2024-06-07 19:25:44	26-35	Female	FSLC	SW	Lagos	Oshodi/Isolo	Ilasamaja	Yes	PDP	1-5 yrs	Yes	APC	Imposition of Candidates	No		No		Yes	Boards	SA	A	N	A	SA	N	N	A	SA	A	D	A	A	D	N	N	N	A	A	D	D	A	N	N	A	N	A
2024-06-07 19:29:03	36-45	Female	WAEC/NECO	SW	Lagos	Lagos Mainland	Oko-Baba	Yes	PDP	6-10 yrs	No			Yes	LG Executive	No		No		SA	SA	D	A	SA	D	N	A	SA	SA	SD	A	A	D	D	SD	D	A	A	SD	D	SA	A	A	A	N	A
2024-06-07 19:32:29	18-25	Male	WAEC/NECO	SW	Lagos	Lagos Mainland	Alagomeji	Yes	PDP	1-5 yrs	No			No		No		No		SA	A	N	N	A	N	D	A	A	SA	N	A	A	N	N	N	N	A	A	D	D	A	D	N	A	N	A
2024-06-10 13:17:14	26-35	Female	WAEC/NECO	NW	Kaduna	Kaduna North	Shaba	Yes	APC	6-10 yrs	Yes	PDP	Imposition of Candidates, Hijack of Party Structure	No		No		No		SA	A	D	A	A	D	N	A	SA	A	D	A	A	D	D	SD	D	A	A	D	D	N	N	N	D	D	A
2024-06-10 13:23:07	18-25	Male	WAEC/NECO	NW	Kaduna	Jema'a	Kafanchan B	Yes	APC	1-5 yrs	No			No		No		No		SA	A	D	A	SA	N	N	A	A	SA	D	A	A	N	D	SD	D	A	A	D	D	N	N	N	D	D	A
2024-06-10 13:34:56	36-45	Female	HND/BSC/(FIRST DEGREE)	NW	Kaduna	Ikara	Rumi	Yes	APC	6-10 yrs	No			No		No		Yes	Boards	SA	SA	N	A	SA	N	A	A	SA	SA	D	N	N	N	D	N	D	A	A	D	D	N	A	A	D	D	A
2024-06-10 13:38:31	46-55	Male	HND/BSC/(FIRST DEGREE)	NW	Kaduna	Kaduna South	Barnawa	Yes	APC	6-10 yrs	No			Yes	State Executive	No		Yes	Cabinet/Exco	SA	SA	N	A	SA	N	A	A	SA	SA	SD	A	A	N	D	SD	D	A	A	SD	D	D	A	A	D	D	A
2024-06-10 14:18:46	66 and above	Male	HND/BSC/(FIRST DEGREE)	NW	Kaduna	Kajuru	Kallah	Yes	APC	6-10 yrs	Yes	ANPP		No		No		Yes	Cabinet/Exco	SA	SA	N	A	SA	N	A	A	SA	SA	D	A	A	N	D	SD	D	N	A	D	D	N	A	A	N	N	A
2024-06-10 14:45:32	56-65	Male	POSTGRADUATE	NW	Kaduna	Kagarko	Kushe	Yes	APC	6-10 yrs	Yes	ANPP		Yes	Zonal Executive	No		Yes	Cabinet/Exco	SA	SA	A	A	SA	A	A	A	SA	A	N	N	N	A	A	N	A	N	A	D	D	D	A	A	N	N	A
2024-06-10 14:51:44	46-55	Male	HND/BSC/(FIRST DEGREE)	NW	Kaduna	Kachia	Kachia Urban	Yes	APC	6-10 yrs	No			Yes	National Executive	No		Yes	Cabinet/Exco	SA	SA	A	A	A	A	SA	A	SA	A	N	N	D	A	A	A	A	D	A	N	D	D	SA	SA	N	N	A
2024-06-10 14:56:23	26-35	Female	NCE/ND/TCII	NW	Kaduna	Jaba	Daddu	Yes	APC	1-5 yrs	No			Yes	LG Executive	No		No		SA	SA	D	A	SA	D	N	A	SA	SA	SD	A	A	D	D	SD	D	A	A	D	D	N	N	N	D	D	A
2024-06-10 22:35:37	26-35	Female	WAEC/NECO	NW	Kaduna	Giwa	Kakagi	Yes	APC	1-5 yrs	No			Yes	Ward Executive	No		No		SA	SA	SD	A	SA	SD	D	A	SA	SA	SD	A	N	N	D	SD	D	A	A	D	SD	N	N	N	N	N	A
2024-06-10 22:46:46	36-45	Male	HND/BSC/(FIRST DEGREE)	NW	Kaduna	Igabi	Gwaraji	Yes	APC	6-10 yrs	No			No		No		Yes	Adviser/Assistant	SA	SA	N	A	SA	N	A	A	SA	SA	D	A	A	D	D	SD	D	A	A	D	D	D	N	N	D	D	A
2024-06-10 23:00:26	46-55	Female	HND/BSC/(FIRST DEGREE)	NW	Kaduna	Kaura	Mallagum	Yes	APC	6-10 yrs	Yes	PDP	Imposition of Candidates, Hijack of Party Structure	Yes	State Executive	No		Yes	Boards	SA	SA	N	A	SA	N	A	A	SA	SA	SD	A	A	N	D	SD	D	A	A	D	D	D	A	A	D	D	A
2024-06-10 23:17:53	66 and above	Male	POSTGRADUATE	NW	Kaduna	Makarfi	Makarfi	Yes	APC	6-10 yrs	Yes	ANPP	Imposition of Candidates, Hijack of Party Structure	No		Yes	MHR	Yes	Cabinet/Exco	SA	SA	A	A	SA	N	A	A	SA	SA	N	A	N	N	N	N	A	D	A	N	D	D	A	A	D	D	A
2024-06-10 23:21:20	26-35	Female	WAEC/NECO	NW	Kaduna	Lere	Lere	Yes	APC	1-5 yrs	No			Yes	Ward Executive	No		No		SA	SA	SD	SA	SA	SD	D	A	SA	SA	SD	A	A	SD	D	SD	D	SA	A	SD	SD	D	N	N	D	D	A
2024-06-11 19:47:35	66 and above	Male	POSTGRADUATE	NC	Nasarawa	Keffi	Angwan Iya 1	Yes	APC	6-10 yrs	Yes	PDP	Factionalization, Hijack of Party Structure	Yes	National Executive	Yes	Senator	Yes	Cabinet/Exco	SA	SA	A	A	SA	A	SA	SA	SA	SA	N	A	N	A	A	A	A	D	N	N	SD	D	SA	SA	N	N	A
2024-06-11 19:57:53	66 and above	Male	POSTGRADUATE	SS	Delta	Aniocha North	Idumueje-Unor	Yes	PDP	6-10 yrs	No			No		Yes	Senator	No		SA	SA	N	A	SA	A	SA	A	SA	SA	N	A	A	N	N	D	N	D	A	N	SD	SA	SA	SA	A	N	A
2024-06-11 20:20:23	46-55	Male	HND/BSC/(FIRST DEGREE)	SS	Delta	Ndokwa East	Aboh/Akarrai	Yes	PDP	11-15 yrs	No			No		Yes	MHR	Yes	Cabinet/Exco	SA	SA	A	A	SA	N	SA	A	SA	SA	D	A	N	N	N	N	N	D	A	D	D	SA	A	A	A	N	A
2024-06-11 21:07:45	36-45	Male	HND/BSC/(FIRST DEGREE)	SS	Delta	Ukwuani	Obiaruku	Yes	PDP	6-10 yrs	No			No		Yes	State Assembly	No		SA	SA	N	A	SA	N	SA	A	SA	SA	D	A	A	D	D	D	D	D	A	D	D	SA	A	A	A	N	A
2024-06-11 21:13:41	36-45	Female	POSTGRADUATE	SS	Delta	Ika North East	Akumazi	Yes	PDP	6-10 yrs	No			No		Yes	State Assembly	Yes	Adviser/Assistant	SA	SA	N	A	SA	N	A	A	SA	SA	D	A	N	D	D	D	D	D	A	D	SD	SA	A	A	A	N	A
2024-06-11 21:19:36	46-55	Female	POSTGRADUATE	SS	Delta	Oshimili North	Ibusa	Yes	PDP	16+ yrs	No			No		Yes	State Assembly	No		SA	SA	N	A	SA	N	A	A	SA	SA	D	A	N	D	D	SD	D	D	A	D	SD	A	A	A	A	N	A
2024-06-11 21:45:56	26-35	Female	WAEC/NECO	NW	Kaduna	Kudan	Zabi	Yes	APC	1-5 yrs	No			No		No		No		SA	SA	D	A	SA	D	N	A	SA	SA	D	A	A	D	D	SD	D	A	A	D	D	N	N	N	N	N	A
2024-06-11 22:21:07	36-45	Female	HND/BSC/(FIRST DEGREE)	NW	Kaduna	Sabon Gari	Zabi	Yes	APC	6-10 yrs	No			Yes	LG Executive	No		No		SA	SA	D	A	A	D	N	A	SA	SA	SD	A	A	D	D	SD	D	A	A	D	D	N	N	N	N	N	A
2024-06-11 22:25:54	18-25	Male	WAEC/NECO	NW	Kaduna	Sabon Gari	Jama'a	Yes	APC	1-5 yrs	No			No		No		No		SA	SA	SD	A	A	SD	D	A	A	A	SD	N	N	SD	D	SD	D	A	A	D	SD	N	N	N	D	N	SA
2024-06-11 22:38:03	46-55	Male	NCE/ND/TCII	NW	Kaduna	Sanga	Gwatu	Yes	APC	6-10 yrs	No			Yes	State Executive	No		No		SA	SA	N	A	SA	N	A	A	SA	SA	D	A	A	D	D	D	D	A	A	SD	SD	D	A	A	D	D	A
2024-06-11 22:46:02	66 and above	Male	WAEC/NECO	NW	Kaduna	Zangon Kataf	Gidan Jatau	Yes	APC	6-10 yrs	Yes	ANPP	Factionalization, Non Inclusion in Decision-making, Hijack of Party Structure	Yes	LG Executive	No		Yes	Boards	SA	A	D	A	SA	N	N	A	SA	SA	SD	A	A	D	D	SD	D	SA	A	SD	SD	D	N	N	D	N	A
2024-06-12 15:08:45	36-45	Female	HND/BSC/(FIRST DEGREE)	NW	Kaduna	Kacha	Gumel	Yes	APC	6-10 yrs	No			Yes	State Executive	No		Yes	Boards	SA	SA	D	A	SA	N	A	A	SA	A	SD	A	A	D	D	SD	D	A	A	D	D	D	A	A	D	D	A
2024-06-12 16:10:01	26-35	Male	WAEC/NECO	NW	Kaduna	Songa	Gwatu	Yes	APC	1-5 yrs	No			Yes	Ward Executive	No		No		SA	SA	SD	A	A	SD	D	A	SA	SA	SD	A	A	D	D	D	D	A	A	D	D	N	N	N	N	D	A
2024-06-12 16:29:23	36-45	Female	HND/BSC/(FIRST DEGREE)	NW	Kaduna	Soba	Soba	Yes	APC	1-5 yrs	Yes	PDP	Imposition of Candidates, Hijack of Party Structure	No		No		No		SA	SA	D	A	SA	D	N	A	A	SA	D	A	A	SD	D	D	D	A	A	D	SD	D	N	N	D	D	A
2024-06-12 16:34:41	26-35	Female	WAEC/NECO	NW	Kaduna	Zaria	Tudun Wada	Yes	APC	6-10 yrs	No			No		Yes	Ward Councilor	Yes	Adviser/Assistant	SA	SA	D	A	SA	D	N	A	A	SA	SD	A	A	D	D	SD	D	A	A	SD	D	N	N	N	D	D	A
2024-06-12 16:40:52	56-65	Male	HND/BSC/(FIRST DEGREE)	NW	Kaduna	Zaria	Kaura	Yes	APC	6-10 yrs	No			No		No		Yes	Adviser/Assistant	SA	SA	SD	A	SA	D	A	A	SA	SA	D	A	SA	D	D	SD	D	A	A	SD	D	D	A	A	D	D	A
2024-06-12 16:46:35	26-35	Female	WAEC/NECO	NW	Kaduna	Sanga	Bokana	Yes	APC	1-5 yrs	No			Yes	LG Executive	No		No		SA	SA	D	SA	SA	N	N	A	SA	SA	SD	A	A	SD	D	SD	D	A	A	SD	D	D	N	N	D	D	A
2024-06-12 16:51:19	26-35	Male	WAEC/NECO	NW	Kaduna	Kauru	Makami	Yes	APC	1-5 yrs	No			Yes	Ward Executive	No		No		SA	A	SD	A	SA	SD	N	A	SA	SA	SD	A	A	SD	D	SD	D	A	A	SD	D	N	N	N	D	D	A
2024-06-13 09:11:50	26-35	Female	NCE/ND/TCII	NW	Kaduna	Jema'a	Kagoma	Yes	PDP	6-10 yrs	No			Yes	LG Executive	No		No		SA	SA	D	A	SA	D	N	A	SA	SA	SD	A	A	D	D	SD	D	SA	A	SD	SD	SA	A	A	SA	N	SA
2024-06-13 09:18:23	36-45	Female	HND/BSC/(FIRST DEGREE)	NW	Kaduna	Ikara	Ikara	Yes	PDP	6-10 yrs	Yes	APC	Imposition of Candidates, Hijack of Party Structure	Yes	State Executive	Yes	Ward Councilor	No		SA	A	D	A	SA	D	A	A	SA	SA	SD	A	A	D	D	SD	D	A	A	SD	D	SA	A	A	SA	A	A
2024-06-13 09:25:13	26-35	Female	WAEC/NECO	NW	Kaduna	Jaba	Fada	Yes	PDP	1-5 yrs	No			No		No		No		SA	A	SD	A	SA	D	N	A	SA	SA	SD	A	A	N	SD	SD	SD	A	A	D	N	SA	A	N	A	N	A
2024-06-13 09:35:28	36-45	Male	HND/BSC/(FIRST DEGREE)	NW	Kaduna	Kaduna South	Sabon Gari South	Yes	PDP	6-10 yrs	Yes	APC	Imposition of Candidates, Hijack of Party Structure	No		No		No		SA	A	D	A	SA	D	N	A	SA	SA	SD	A	A	N	D	SD	D	A	A	SD	SD	SA	A	A	A	N	A
2024-06-13 09:41:51	26-35	Female	WAEC/NECO	NW	Kaduna	Kajuru	Kufana	Yes	PDP	1-5 yrs	No			Yes	Ward Executive	No		No		SA	A	SD	A	SA	D	D	A	SA	SA	SD	A	A	D	D	SD	D	A	A	SD	D	A	N	N	A	A	A
2024-06-13 09:51:01	56-65	Male	HND/BSC/(FIRST DEGREE)	NW	Kaduna	Kubau	Zabi	Yes	PDP	11-15 yrs	No			Yes	State Executive	No		Yes	Cabinet/Exco	SA	SA	D	A	SA	N	A	A	SA	SA	SD	A	A	D	D	SD	D	A	A	SD	D	SA	A	A	A	N	A
2024-06-13 09:58:57	26-35	Female	WAEC/NECO	NW	Kaduna	Makarfi	Tudun Wada	Yes	PDP	1-5 yrs	No			No		No		No		SA	A	SD	A	SA	N	N	A	SA	SA	SD	A	A	SD	D	SD	D	SA	A	SD	D	A	N	N	A	A	A
2024-06-13 10:13:12	46-55	Female	HND/BSC/(FIRST DEGREE)	NW	Kaduna	Kachia	Katari	Yes	PDP	6-10 yrs	No			No		No		No		SA	SA	D	A	SA	N	N	A	SA	SA	SD	A	A	N	D	SD	D	SA	A	SD	D	SA	A	A	SA	A	A
2024-06-13 10:20:09	46-55	Female	HND/BSC/(FIRST DEGREE)	NW	Kaduna	Kagarko	Kagarko South	Yes	PDP	11-15 yrs	No			Yes	State Executive	No		No		SA	SA	D	A	SA	N	A	A	SA	SA	SD	A	A	D	D	SD	D	A	A	SD	D	SA	A	A	SA	A	A
2024-06-13 10:31:18	26-35	Female	NCE/ND/TCII	NW	Kaduna	Kauru	Dawaki	Yes	PDP	1-5 yrs	No			No		No		No		SA	A	D	A	SA	N	N	A	SA	SA	SD	A	A	D	D	SD	D	A	A	SD	D	A	N	N	A	N	A
2024-06-13 10:36:52	18-25	Female	WAEC/NECO	NW	Kaduna	Kaura	Kaura	Yes	PDP	1-5 yrs	No			No		No		No		SA	A	D	A	SA	D	N	A	SA	SA	SD	A	A	SD	D	SD	D	SA	A	SD	D	SA	N	N	A	N	A
2024-06-13 18:29:53	26-35	Female	HND/BSC/(FIRST DEGREE)	NW	Kaduna	Kaduna North	Gaji	Yes	PDP	1-5 yrs	Yes	APC	Imposition of Candidates	No		No		No		SA	A	D	A	SA	N	N	A	SA	SA	SD	A	A	D	D	SD	D	SA	A	SD	D	A	N	N	A	A	A
2024-06-13 18:36:31	36-45	Male	WAEC/NECO	NW	Kaduna	Kudan	Zabi	Yes	PDP	6-10 yrs	No			Yes	LG Executive	No		No		SA	A	D	A	SA	N	N	A	SA	SA	SD	A	A	SD	D	SD	D	SA	A	SD	SD	SA	A	A	SA	A	A
2024-06-13 18:39:33	46-55	Female	WAEC/NECO	NW	Kaduna	Lere	Garu	Yes	PDP	6-10 yrs	No			Yes	LG Executive	No		No		SA	A	SD	A	SA	N	N	A	SA	A	D	A	A	N	D	D	D	A	A	SD	D	A	N	N	A	A	A
2024-06-13 18:44:03	18-25	Male	WAEC/NECO	NW	Kaduna	Soba	Gimba	Yes	PDP	1-5 yrs	No			No		No		No		SA	SA	D	A	SA	N	N	A	SA	SA	SD	A	A	D	D	SD	D	A	A	SD	D	A	N	N	A	N	A
2024-06-13 18:48:30	36-45	Female	NCE/ND/TCII	NW	Kaduna	Zomgon Kataef	Gora	Yes	PDP	1-5 yrs	Yes	APC	Imposition of Candidates	No		No		No		SA	A	D	A	SA	N	A	A	SA	SA	SD	A	A	D	D	D	D	A	A	SD	D	A	N	N	A	N	A
2024-06-13 18:58:56	26-35	Female	WAEC/NECO	NW	Kaduna	Zaria	Dambo	Yes	PDP	1-5 yrs	No			No		No		No		SA	SA	N	A	A	N	N	A	SA	SA	SD	A	A	N	D	SD	D	SA	A	SD	SD	SA	N	N	A	N	A
2024-06-13 19:08:14	26-35	Male	WAEC/NECO	NW	Kaduna	Sanga	Ayu	Yes	PDP	1-5 yrs	No			Yes	Ward Executive	No		No		SA	A	D	A	SA	N	N	A	SA	SA	SD	A	A	N	D	SD	D	A	A	SD	D	A	A	A	A	N	A
2024-06-13 19:16:24	36-45	Female	WAEC/NECO	NW	Kaduna	Sabon Gari	Bomo	Yes	PDP	6-10 yrs	No			Yes	LG Executive	No		No		SA	A	N	A	SA	N	N	A	SA	SA	SD	A	A	N	D	D		A	A	SD	D	A	N	N	A	A	A
2024-06-13 19:41:11	26-35	Female	WAEC/NECO	NW	Kaduna	Igabi	Igabi	Yes	PDP	1-5 yrs	No			Yes	Ward Executive	No		No		SA	A	D	A	SA	N	N	A	SA	SA	SD	A	A	SD	D	SD	D	SA	A	SD	D	SA	N	N	A	A	A
2024-06-13 19:52:31	26-35	Female	WAEC/NECO	NW	Kaduna	Giwa	Kadangi	Yes	PDP	1-5 yrs	No			No		No		No		SA	A	SD	A	SA	D	N	A	SA	SA	SD	A	A	SD	D	D	D	SA	A	SD	SD	SA	A	A	A	A	A
2024-06-13 19:56:19	26-35	Male	NCE/ND/TCII	NW	Kaduna	Giwa	Shika	Yes	PDP	1-5 yrs	No			Yes	Ward Executive	No		No		SA	A	D	A	SA	D	N	A	SA	SA	SD	A	A	SD	D	SD	D	SA	A	SD	D	SA	N	N	A	N	A
2024-06-22 19:30:30	56-65	Male	POSTGRADUATE	SS	Delta	Bomadi	Ogbeinama/Okoloba	Yes	PDP	16+ yrs	No			Yes	State Executive	Yes	Senator	Yes	Cabinet/Exco	SA	SA	D	A	SA	N	SA	A	SA	SA	D	A	A	N	N	D	N	D	A	D	D	SA	SA	SA	A	N	A
2024-06-22 19:42:21	56-65	Male	POSTGRADUATE	SS	Delta	Ughelli North	Ughelli	Yes	APC	6-10 yrs	Yes	PDP	Non Inclusion in Decision-making, Imposition of Candidates	No		Yes	Senator	No		SA	SA	N	A	SA	N	SA	A	SA	SA	D	A	A	A	N	N	N	D	A	D	D	N	SA	SA	N	N	A
2024-06-22 19:54:22	56-65	Male	POSTGRADUATE	SS	Delta	Sapele	Sapele Urban	Yes	APC	1-5 yrs	Yes	PDP	Non Inclusion in Decision-making, Imposition of Candidates	No		Yes	Senator	Yes	Adviser/Assistant	SA	SA	N	A	A	N	SA	A	SA	A	D	A	A	N	D	D	N	D	A	D	D	N	SA	SA	N	N	A
2024-06-22 20:05:26	56-65	Male	POSTGRADUATE	NC	Nasarawa	Akwanga	Akwanga west	Yes	PDP	16+ yrs	No			No		Yes	Senator	No		SA	SA	N	A	SA	N	SA	A	SA	SA	D	A	A	D	N	D	N	D	A	D	D	SA	SA	SA	A	A	A
2024-06-22 20:18:25	46-55	Male	HND/BSC/(FIRST DEGREE)	NC	Nasarawa	Nasarawa Eggon	Igga/Burumburum	Yes	APC	6-10 yrs	Yes	PDP	Non Inclusion in Decision-making, Imposition of Candidates	No		Yes	Senator	No		SA	SA	N	A	A	D	SA	A	SA	SA	D	A	A	D	N	D	D	N	A	D	D	N	A	N	N	D	A
2024-06-22 22:53:13	66 and above	Male	POSTGRADUATE	NE	Adamawa	Mayo-Belwa	Ribadu	Yes	PDP	11-15 yrs	No			Yes	State Executive	Yes	Senator	No		SA	SA	N	A	SA	N	SA	A	SA	SA	D	A	A	D	D	SD	N	D	A	D	D	A	SA	SA	A	N	A
2024-06-23 09:24:25	46-55	Male	HND/BSC/(FIRST DEGREE)	NE	Adamawa	Mubi South		Yes	APC	6-10 yrs	No			No		Yes	Senator	No		SA	SA	D	A	SA	N	SA	A	SA	SA	D	A	A	N	D	D	D	D	A	D	D	N	SA	A	N	D	A
2024-06-23 09:30:25	46-55	Male	POSTGRADUATE	NE	Adamawa	Hong	Uba	Yes	PDP	6-10 yrs	Yes	APC	Factionalization, Non Inclusion in Decision-making, Imposition of Candidates	No		Yes	Senator	No		SA	SA	N	A	SA	N	SA	A	SA	SA	D	A	A	N	N	D	N	D	A	D	D	SA	SA	SA	A	A	A
2024-06-23 10:05:30	46-55	Female	POSTGRADUATE	NE	Adamawa	Yola South	Ngurore	Yes	APC	6-10 yrs	Yes	PDP	Imposition of Candidates, Hijack of Party Structure	No		Yes	Senator	No		SA	SA	N	A	SA	N	SA	A	SA	SA	SD	A	A	N	D	D	D	D	A	D	D	N	A	A	D	N	A
2024-06-23 10:39:13	56-65	Male	HND/BSC/(FIRST DEGREE)	SE	Imo	Ikeduru	Amaimo	Yes	PDP	16+ yrs	No			Yes	National Executive	Yes	Senator	Yes	Caretaker LGA Chairman	SA	SA	A	A	SA	N	SA	A	SA	SA	N	A	N	A	N	N	N	D	A	D	SD	SA	SA	SA	SA	A	A
2024-06-23 10:44:37	56-65	Male	HND/BSC/(FIRST DEGREE)	SE	Imo	Ideato South	Ogboko	Yes	APC	11-15 yrs	Yes	PDP	Non Inclusion in Decision-making, Imposition of Candidates	No		Yes	Senator	Yes	Boards	SA	SA	N	A	SA	N	SA	A	SA	SA	D	A	A	N	N	SD	N	D	A	D	SD	N	A	A	N	N	A
2024-06-23 10:54:07	66 and above	Male	HND/BSC/(FIRST DEGREE)	SE	Imo	Isiala Mbano		Yes	PDP	6-10 yrs	Yes	APC	Non Inclusion in Decision-making, Imposition of Candidates	No		Yes	Senator	Yes	Boards	SA	SA	D	A	SA	N	SA	A	SA	SA	D	A	A	N	D	D	D	N	A	SD	D	SA	A	N	A	A	A
2024-06-23 11:08:50	66 and above	Male	HND/BSC/(FIRST DEGREE)	SE	Imo	Oru East	Omuma	Yes	APC	6-10 yrs	Yes	PDP	Non Inclusion in Decision-making, Imposition of Candidates	Yes	National Executive	Yes	Senator	No		SA	SA	N	A	SA	N	SA	A	SA	SA	A	N	N	A	N	N	N	D	N	N	SD	N	SA	SA	N	N	A
2024-06-23 14:11:58	56-65	Male	POSTGRADUATE	NW	Kaduna	Zangon Kataf	Madakiya	Yes	PDP	11-15 yrs	No			No		Yes	Senator	No		SA	SA	N	A	SA	N	SA	A	SA	SA	SD	A	A	N	D	SD	D	D	A	SD	SD	SA	SA	SA	A	A	A
2024-06-23 14:18:33	66 and above	Male	POSTGRADUATE	NW	Kaduna	Markafi	Markafi	Yes	PDP	16+ yrs	No			Yes	National Executive	Yes	Senator	Yes	Cabinet/Exco	SA	SA	A	A	A	N	SA	A	SA	SA	SD	A	A	A	N	N	N	D	A	SD	SD	SA	SA	SA	SA	A	A
2024-06-23 14:37:47	46-55	Male	POSTGRADUATE	NW	Kaduna	Zaria		Yes	APC	6-10 yrs	Yes	PDP	Non Inclusion in Decision-making, Imposition of Candidates	No		Yes	Senator	Yes	Cabinet/Exco	SA	SA	N	A	A	N	SA	A	SA	SA	D	A	A	N	N	D	N	D	A	D	SD	N	SA	SA	N	N	A
2024-06-23 15:01:08	56-65	Male	POSTGRADUATE	NW	Kaduna	Sabon Gari	Dogorawa	Yes	APC	11-15 yrs	No					Yes	Senator	Yes	Cabinet/Exco	SA	SA	N	A	SA	N	SA	A	SA	SA	SD	A	A	N	D	SD	D	D	A	D	SD	N	SA	A	N	N	A
2024-06-23 15:06:25	46-55	Female	POSTGRADUATE	SW	Lagos	Ojo	Ojo	Yes	APC	6-10 yrs	No			No		Yes	Senator	Yes	Boards	SA	SA	A	A	SA	N	SA	A	SA	SA	D	A	A	N	N	D	N	D	A	D	SD	N	A	A	N	N	A
2024-06-23 15:12:38	56-65	Male	POSTGRADUATE	SW	Lagos	Lagos Island	Oluwole	Yes	APC	6-10 yrs	No			No		Yes	Senator	Yes	Cabinet/Exco	SA	SA	N	A	A	N	A	A	SA	SA	D	A	A	N	N	D	N	D	A	D	SD	N	SA	SA	N	N	A
2024-06-24 12:23:30	56-65	Male	HND/BSC/(FIRST DEGREE)	SS	Delta	Bomadi	Bomadi 1	Yes	PDP	16+ yrs	No			No		Yes	MHR	No		SA	SA	N	A	SA	N	SA	A	SA	SA	D	A	A	N	D	SD	D	SD	A	SD	D	SA	SA	SA	A	A	A
2024-06-24 12:26:55	36-45	Female	HND/BSC/(FIRST DEGREE)	SS	Delta	Ethiope West	Oghara	Yes	PDP	6-10 yrs	No			No		Yes	MHR	Yes	Adviser/Assistant	SA	SA	D	A	SA	N	SA	A	SA	SA	SD	A	A	D	D	SD	D	N	A	SD	D	SA	A	A	A	N	A
2024-06-24 12:50:30	56-65	Male	HND/BSC/(FIRST DEGREE)	SS	Delta	Udu	Aladja	Yes	APC	6-10 yrs	No			No		Yes	MHR	No		SA	SA	N	A	A	N	SA	A	SA	SA	D	A	A	D	D	SD	D	D	A	SD	D	D	A	A	N	D	A
2024-06-24 12:54:34	36-45	Male	HND/BSC/(FIRST DEGREE)	SS	Delta	Uvwie	Effurun 1	Yes	APC	6-10 yrs	No			No		Yes	State Assembly	No		SA	SA	D	A	A	D	A	A	SA	SA	SD	A	A	D	D	SD	D	N	A	SD	A	D	A	A	D	D	A
2024-06-24 12:58:57	36-45	Male	HND/BSC/(FIRST DEGREE)	SS	Delta	Udu	Udu 11	Yes	APC	6-10 yrs	No			No		Yes	State Assembly	No		SA	A	D	A	A	D	A	A	SA	SA	SD	A	A	D	D	SD	D	D	A	SD	D	N	A	A	D	D	A
2024-06-24 13:04:50	56-65	Male	HND/BSC/(FIRST DEGREE)	NE	Adamawa	Numan	Mburu	Yes	PDP	11-15 yrs	No			Yes	State Executive	Yes	MHR	Yes	Cabinet/Exco	SA	SA	N	A	SA	N	SA	A	SA	SA	SD	A	A	N	D	SD	D	D	A	SD	D	SA	SA	SA	A	A	A
2024-06-24 13:10:54	66 and above	Male	HND/BSC/(FIRST DEGREE)	NE	Adamawa	Hong	Hong	Yes	APC	6-10 yrs	Yes	PDP	Non Inclusion in Decision-making, Imposition of Candidates	Yes	State Executive	Yes	MHR	No	Cabinet/Exco	SA	SA	D	A	SA	D	SA	A	SA	SA	SD	A	A	D	D	SD	D	D	A	SD	D	N	A	A	N	N	A
2024-06-24 13:17:09	46-55	Male	HND/BSC/(FIRST DEGREE)	NE	Adamawa	Fuforel	Fufore	Yes	APC	6-10 yrs	Yes	PDP	Imposition of Candidates	Yes	LG Executive	Yes	MHR	Yes	Adviser/Assistant	SA	SA	N	A	A	N	SA	A	SA	SA	D	A	A	D	D	D	D	D	A	SD	D	D	A	A	D	D	A
2024-06-24 13:23:50	56-65	Male	HND/BSC/(FIRST DEGREE)	NE	Adamawa	Jada	Mayokalaye	Yes	PDP	11-15 yrs	No			Yes	State Executive	Yes	MHR	Yes	Cabinet/Exco	SA	SA	N	A	SA	N	SA	A	SA	SA	SD	A	A	D	D	SD	D	D	A	SD	D	SA	A	A	A	A	A
2024-06-24 13:38:40	26-35	Male	HND/BSC/(FIRST DEGREE)	SE	Imo	Ideato North	Umuokwara	Yes	PDP	1-5 yrs	No			No		Yes	MHR	Yes	Adviser/Assistant	SA	SA	D	A	SA	N	SA	A	SA	SA	SD	A	A	D	D	SD	D	N	A	SD	D	SA	A	A	A	A	A
2024-06-24 13:42:25	56-65	Male	HND/BSC/(FIRST DEGREE)	SE	Imo	Aboh Mbaise	Mbutu	Yes	PDP	16+ yrs	No			No		Yes	MHR	Yes	Adviser/Assistant	SA	SA	D	A	A	D	SA	A	SA	SA	SD	A	A	D	D	SD	D	D	A	SD	D	SA	SA	SA	A	A	A
2024-06-24 13:46:43	46-55	Male	HND/BSC/(FIRST DEGREE)	SE	Imo	Ngor Okpala	Nguru Umuowa	Yes	APC	1-5 yrs	Yes	PDP	Imposition of Candidates	No		Yes	MHR	No		SA	SA	D	A	A	N	A	A	SA	SA	SD	A	A	D	D	SD	D	N	A	SD	D	D	A	A	D	D	A
2024-06-24 13:50:46	56-65	Male	WAEC/NECO	SE	Imo	Orlu	Ihitenasa	Yes	APC	6-10 yrs	No			No		Yes	MHR	No		SA	A	N	A	SA	D	A	A	SA	SA	SD	A	A	D	D	SD	D	N	A	SD	D	D	A	A	D	D	A
2024-06-25 13:33:13	36-45	Male	POSTGRADUATE	NW	Kaduna	Kaduna North	Badarawa	Yes	APC	6-10 yrs	No			No		Yes	MHR	Yes	Adviser/Assistant	SA	SA	D	A	SA	N	SA	A	SA	SA	SD	A	A	N	D	SD	D	N	A	SD	D	N	A	A	D	D	A	Are there significant differences in the relationships between decentralized party organization and inclusive local participation in decision making in your Party?
2024-06-25 13:39:40	46-55	Male	POSTGRADUATE	NW	Kaduna	Sabon Gari	Dogorawa	Yes	PDP	6-10 yrs	No			No		Yes	MHR	Yes	Boards	SA	SA	D	A	SA	D	SA	A	SA	SA	SD	A	A	D	D	SD	D	N	A	SD	D	SA	A	A	A	A	A
2024-06-25 13:46:43	56-65	Male	POSTGRADUATE	NW	Kaduna	Jaba	Fada	Yes	PDP	16+ yrs	No			No		Yes	MHR	Yes	Adviser/Assistant	SA	SA	D	A	SA	D	SA	A	SA	SA	SD	A	A	D	D	SD	D	D	A	SD	D	SA	SA	SA	A	A	A
2024-06-25 13:54:16	56-65	Male	POSTGRADUATE	NW	Kaduna	Zaria	Kwarbai	Yes	APC	11-15 yrs	No			No		Yes	MHR	No		SA	SA	N	A	SA	D	SA	A	SA	SA	SD	A	A	D	D	SD	D	D	A	SD	D	N	A	A	D	D	SA
2024-06-26 10:46:59	46-55	Male	HND/BSC/(FIRST DEGREE)	SW	Lagos	Ojo	Ojo	Yes	PDP	11-15 yrs	No			No		Yes	MHR	No		SA	SA	D	A	SA	D	SA	A	SA	SA	SD	A	A	D	D	SD	D	D	A	SD	SD	SA	SA	SA	SA	A	A
2024-06-26 10:50:48	56-65	Male	POSTGRADUATE	SW	Lagos	Surulere	Ikate	Yes	APC	11-15 yrs	No			No		Yes	MHR	Yes	Cabinet/Exco	SA	SA	N	A	SA	N	SA	A	SA	SA	D	A	A	D	D	D	D	D	A	SD	D	N	A	A	N	N	A
2024-06-26 10:55:50	66 and above	Male	POSTGRADUATE	SW	Lagos	Oshodi-Isolo	Isolo	Yes	APC	11-15 yrs	No			No		Yes	MHR	Yes	Cabinet/Exco	SA	SA	D	A	SA	N	SA	A	SA	SA	SD	A	A	N	D	SD	D	D	A	D	A	N	A	A	N	N	A
2024-06-26 11:01:22	66 and above	Male	HND/BSC/(FIRST DEGREE)	SW	Lagos	Amuwo Odofin	Festac	Yes	PDP	6-10 yrs	No			No		Yes	MHR	No		SA	SA	D	A	A	D	SA	A	SA	SA	SD	A	A	D	D	SD	D	D	A	SD	D	SA	SA	SA	SA	A	A
2024-06-26 12:50:36	36-45	Male	POSTGRADUATE	NC	Nasarawa	Wamba	Wamba	Yes	APC	1-5 yrs	No			No		Yes	MHR	No		SA	SA	D	A	SA	D	SA	A	SA	SA	SD	A	A	D	D	SD	D	N	A	SD	D	N	A	A	N	D	A
2024-06-26 13:00:21	46-55	Male	POSTGRADUATE	NC	Nasarawa	Awe	Madaki	Yes	APC	6-10 yrs	No			No		Yes	MHR	No		SA	SA	D	A	SA	N	SA	A	SA	SA	SD	A	A	N	D	SD	D	D	A	SD	D	N	A	A	N	D	N
2024-06-30 13:37:49	46-55	Male	HND/BSC/(FIRST DEGREE)	NW	Kaduna	Sabon Gari	Basawa	Yes	APC	6-10 yrs	No			No		Yes	State Assembly	No		SA	SA	D	A	A	D	SA	A	SA	SA	SD	A	A	D	D	SD	D	N	A	SD	D	N	A	A	D	D	A
2024-06-30 13:41:07	36-45	Male	HND/BSC/(FIRST DEGREE)	NW	Kaduna	Giwa	Idasu	Yes	APC	1-5 yrs	No			No		Yes	State Assembly	No		SA	SA	D	A	SA	D	A	A	SA	SA	SD	A	A	D	D	SD	D	A	A	SD	D	D	A	A	D	D	A
2024-06-30 13:44:33	36-45	Male	HND/BSC/(FIRST DEGREE)	NW	Kaduna	Ikara	Paki	Yes	APC	6-10 yrs	No			Yes	State Executive	Yes	State Assembly	Yes	Adviser/Assistant	SA	SA	D	A	SA	N	SA	A	SA	SA	SD	A	A	D	D	SD	D	D	A	SD	D	D	A	A	D	D	A
2024-06-30 13:48:56	46-55	Male	HND/BSC/(FIRST DEGREE)	NW	Kaduna	Jema'a	Kagoma	Yes	PDP	1-5 yrs	Yes	APC	Non Inclusion in Decision-making, Imposition of Candidates	No		Yes	State Assembly	No		SA	SA	D	A	SA	N	A	A	SA	SA	SD	A	A	D	D	SD	D	N	A	SD	D	SA	SA	SA	A	A	A
2024-06-30 13:51:57	46-55	Male	NCE/ND/TCII	NW	Kaduna	Kachia	Doka	Yes	PDP	6-10 yrs	No			Yes	LG Executive	Yes	State Assembly	No		SA	SA	D	A	SA	N	A	A	SA	SA	SD	A	A	D	D	SD	D	D	A	SD	D	SA	SA	SA	A	A	A
2024-06-30 14:18:53	26-35	Male	HND/BSC/(FIRST DEGREE)	NW	Kaduna	Markafi	Markafi	Yes	PDP	1-5 yrs	No			Yes	National Executive	No		No		SA	SA	N	A	SA	N	SA	A	SA	SA	N	A	N	N	N	N	N	D	A	N	D	SA	SA	SA	SA	A	A
2024-06-30 14:22:10	46-55	Male	HND/BSC/(FIRST DEGREE)	NW	Kaduna	Kajuru	Kajuru	Yes	PDP	6-10 yrs	No			Yes	LG Executive	Yes	State Assembly	No		SA	SA	D	SA	SA	N	SA	A	SA	SA	SD	A	A	D	D	SD	D	D	A	SD	D	SA	SA	SA	SA	A	A
2024-06-30 18:52:02	36-45	Male	HND/BSC/(FIRST DEGREE)	NC	Nasarawa	Karu	Aso/Kodape	Yes	PDP	6-10 yrs	No			Yes	State Executive	Yes	State Assembly	No		SA	SA	D	A	SA	D	SA	A	SA	SA	SD	A	A	D	D	SD	D	D	A	SD	D	SA	A	A	A	N	A
2024-06-30 18:54:43	36-45	Male	HND/BSC/(FIRST DEGREE)	NC	Nasarawa	Lafia	Assakio	Yes	PDP	6-10 yrs	Yes	APC	Imposition of Candidates, Hijack of Party Structure	No		Yes	State Assembly	No		SA	SA	D	A	SA	D	SA	A	SA	SA	SD	A	A	D	D	SD	D	A	A	SD	D	SA	A	A	SA	A	A
2024-06-30 19:14:23	46-55	Male	HND/BSC/(FIRST DEGREE)	NC	Nasarawa	Kokona	Garuku	Yes	APC	11-15 yrs	No			No		Yes	State Assembly	No		SA	SA	D	A	SA	D	SA	A	SA	SA	SD	A	A	D	D	SD	D	D	A	SD	D	D	SA	SA	D	D	A
2024-06-30 19:17:04	46-55	Male	HND/BSC/(FIRST DEGREE)	NC	Nasarawa	Awe	Galadima	Yes	APC	6-10 yrs	No			No		Yes	State Assembly	No		SA	SA	D	A	SA	D	SA	A	SA	SA	SD	A	A	D	D	SD	D	D	A	SD	D	D	SA	SA	D	D	A
2024-06-30 19:20:38	36-45	Male	HND/BSC/(FIRST DEGREE)	NC	Nasarawa	Keffi	Liman Abaji	Yes	APC	6-10 yrs	No			No		Yes	State Assembly	No		SA	SA	D	A	SA	N	SA	A	SA	SA	SD	A	A	SD	D	SD	D	N	A	SD	D	D	SA	SA	D	D	A
2024-06-30 19:25:11	36-45	Female	HND/BSC/(FIRST DEGREE)	NE	Adamawa	Demsa	Dong	Yes	PDP	6-10 yrs	No			Yes	LG Executive	Yes	State Assembly	Yes	Adviser/Assistant	SA	SA	D	SA	SA	D	SA	A	SA	SA	D	A	A	SD	D	SD	D	N	A	SD	D	SA	SA	SA	SA	A	A
2024-06-30 19:27:52	36-45	Male	NCE/ND/TCII	NE	Adamawa	Jada	Mbulo	Yes	PDP	6-10 yrs	No			No		Yes	State Assembly	No		SA	SA	N	A	A	N	SA	A	SA	SA	SD	N	N	SD	D	SD	D	N	A	SD	D	SA	SA	SA	SA	A	A
2024-06-30 19:31:40	26-35	Male	HND/BSC/(FIRST DEGREE)	NE	Adamawa	Fufore	Gurin	Yes	APC	6-10 yrs	No			Yes	State Executive	Yes	State Assembly	No		SA	SA	SD	A	A	N	SA	A	SA	SA	SD	N	A	SD	D	SD	D	A	A	SD	D	D	A	A	D	D	A
2024-06-30 19:35:11	46-55	Male	HND/BSC/(FIRST DEGREE)	NE	Adamawa	Ganye	Sugu	Yes	APC	6-10 yrs	No			Yes	LG Executive	Yes	State Assembly	No		SA	SA	N	A	A	N	SA	A	SA	SA	SD	N	N	N	D	D	D	N	A	SD	D	D	SA	SA	D	D	A
2024-06-30 19:38:37	46-55	Male	HND/BSC/(FIRST DEGREE)	NE	Adamawa	Hong	Daksiri	Yes	PDP	11-15 yrs	No			Yes	National Executive	No		Yes	Cabinet/Exco	SA	SA	A	A	A	N	SA	A	SA	SA	N	N	N	A	A	N	N	N	A	D	D	SA	SA	SA	SA	A	SA
2024-06-30 22:16:06	56-65	Male	HND/BSC/(FIRST DEGREE)	NE	Adamawa	Yola North	Rumde	Yes	APC	6-10 yrs	No			Yes	National Executive	Yes	MHR	Yes	Cabinet/Exco	SA	SA	N	A	SA	A	SA	A	SA	SA	N	N	N	A	A	A	A	D	A	N	D	D	SA	SA	D	D	A
2024-06-30 22:20:39	46-55	Male	POSTGRADUATE	SE	Imo	Ideato North	Izuogu	Yes	APC	11-15 yrs	No			Yes	National Executive	No		Yes	Adviser/Assistant	SA	SA	A	A	SA	N	SA	A	SA	SA	N	N	N	A	A	A	A	N	A	N	D	D	SA	SA	D	D	A
2024-06-30 22:25:35	36-45	Male	POSTGRADUATE	SW	Lagos	Lagos Island	Eiyekole	Yes	APC	6-10 yrs	No			Yes	National Executive	No		No		SA	SA	D	A	SA	N	SA	A	SA	SA	D	A	A	D	N	N	D	N	A	N	D	D	SA	SA	D	N	A
2024-06-30 22:32:21	46-55	Male	HND/BSC/(FIRST DEGREE)	SE	Imo	Orlu	Umudioka	Yes	APC	6-10 yrs	No			Yes	Zonal Executive	No		No		SA	A	D	A	SA	N	SA	A	SA	SA	SD	A	A	D	D	SD	D	A	A	SD	D	D	SA	SA	D	N	A
2024-07-01 13:08:44	66 and above	Male	HND/BSC/(FIRST DEGREE)	SS	Delta	Isoko North	Ellu	Yes	PDP	16+ yrs	No			Yes	National Executive	No		No		SA	SA	D	A	SA	N	SA	A	SA	SA	D	N	N	A	N	N	N	D	A	D	D	SA	SA	SA	SA	A	A
2024-07-01 13:13:24	56-65	Male	POSTGRADUATE	SS	Delta	Aniocha South	Ogwashi Uku	Yes	PDP	16+ yrs	No			Yes	Zonal Executive	Yes	MHR	Yes	Adviser/Assistant	SA	SA	D	A	SA	D	SA	A	SA	SA	SD	A	A	D	D	SD	D	D	A	SD	SD	SA	SA	SA	SA	A	A
2024-07-01 13:27:54	56-65	Male	POSTGRADUATE	SS	Delta	Ika South	Agbor1	Yes	APC	6-10 yrs	No			Yes	National Executive	No		Yes	Adviser/Assistant	SA	SA	D	A	SA	A	SA	A	SA	SA	N	A	A	A	A	N	A	A	A	N	D	D	SA	SA	D	D	A
2024-07-01 13:40:14	36-45	Male	HND/BSC/(FIRST DEGREE)	SS	Delta	Patani	Patani 111	Yes	APC	1-5 yrs	No			Yes	Zonal Executive	No		No		SA	SA	D	A	SA	N	A	A	SA	SA	SD	A	A	D	D	D	D	A	A	SD	D	D	A	A	D	D	A
2024-07-01 14:21:18	46-55	Male	HND/BSC/(FIRST DEGREE)	SW	Lagos	Agege	Orile Agege/Oko Oba	Yes	APC	11-15 yrs	No			Yes	Ward Executive	Yes	State Assembly	No		SA	SA	A	A	SA	A	SA	A	SA	SA	N	A	A	A	A	N	A	D	A	N	D	D	SA	SA	D	N	A
2024-07-01 14:26:16	36-45	Male	HND/BSC/(FIRST DEGREE)	SW	Lagos	Agege	Isale Odo	Yes	APC	6-10 yrs	No			No		Yes	State Assembly	No		SA	SA	D	A	SA	D	SA	A	SA	SA	SD	A	A	D	D	SD	D	D	A	SD	D	D	SA	SA	D	N	A
2024-07-01 14:32:38	56-65	Male	HND/BSC/(FIRST DEGREE)	SW	Lagos	Ajeromi - Ifelodun	Olodi	Yes	APC	6-10 yrs	No			No		Yes	State Assembly	No		SA	SA	D	A	SA	N	SA	A	SA	SA	SD	A	A	D	D	SD	D	D	A	SD	D	D	SA	SA	D	D	A
2024-07-07 17:28:40	46-55	Female	HND/BSC/(FIRST DEGREE)	SE	Imo	Isu	Ekwe	Yes	PDP	11-15 yrs	No			No		Yes	State Assembly	Yes	Adviser/Assistant	SA	SA	D	A	SA	D	SA	A	SA	SA	SD	A	A	D	D	SD	D	N	A	SD	D	SA	SA	SA	SA	A	A
2024-07-07 17:36:48	36-45	Female	HND/BSC/(FIRST DEGREE)	SE	Imo	Isu	Isu Njaba 2	Yes	APC	6-10 yrs	No			No		Yes	State Assembly	No		SA	SA	D	A	SA	N	SA	A	SA	SA	SD	A	A	D	D	SD	D	N	A	SD	D	D	A	A	D	D	A
2024-07-08 16:30:53	36-45	Male	HND/BSC/(FIRST DEGREE)	SE	Imo	Njaba	Umuaka 11	Yes	APC	6-10 yrs	No			No		Yes	State Assembly	No		SA	SA	D	A	SA	D	A	A	SA	SA	SD	A	A	D	D	SD	D	N	A	SD	D	D	A	A	D	D	A
2024-07-08 16:39:17	46-55	Male	POSTGRADUATE	SE	Imo	Aboh Mbaise	Uvuru	Yes	PDP	11-15 yrs	No			Yes	State Executive	Yes	State Assembly	Yes	Adviser/Assistant	SA	SA	D	A	SA	D	A	A	SA	SA	SD	A	N	N	SD	SD	SD	N	A	SD	SD	SA	SA	SA	A	A	A
2024-07-08 16:44:36	46-55	Male	HND/BSC/(FIRST DEGREE)	SE	Imo	Ideato South	Isiekenesi 1	Yes	PDP	11-15 yrs	No			No		Yes	State Assembly	No		SA	SA	D	A	SA	D	A	A	SA	SA	SD	N	N	D	SD	D	SD	N	A	SD	SD	SA	SA	A	SA	A	A
2024-07-08 16:50:52	36-45	Male	HND/BSC/(FIRST DEGREE)	SE	Imo	Ideato North	Osina	Yes	APC	6-10 yrs	No			No		Yes	State Assembly	No		SA	SA	SD	N	SA	N	SA	A	SA	SA	SD	N	N	N	D	SD	D	SD	A	SD	SD	D	SA	A	D	D	A
																																						How does the level of decentralization of party structures enhance their ideologies in Nigeria ?
[truncated: 3 more columns]

## Sheet: Pilot Testing
2024-04-28 20:41:48	46-55	Male	POSTGRADUATE	SE	Anambra	Awka South	Awka Ward 111	Yes	PDP	16+ yrs	No	N/A		No	No		No		Yes	Committee Chairman and Secretary respectively	SA	SA	A	SA	SA	A	A	SA	SA	N	SA	SA	A	A	A	A	SA	SA	A	N	A	SA	SA	SA	SA
2024-04-29 15:55:12	36-45	Male	POSTGRADUATE	SE	Anambra	Ayamelum Local Government Area	Omor 1	Yes	PDP	6-10 yrs	Yes	APGA	Factionalization, Non Inclusion in Decision-making, Imposition of Candidates, Hijack of Party Structure	Yes	No	State Executive	Yes	State Assembly	Yes	Adviser/Assistant	SA	SD	SD	SA	SA	D	SA	SA	SA	A	SA	SA	SD	A	SA	SD	SA	SA	SD	SD	D	D	D	SA	D
2024-04-29 16:27:47	46-55	Male	POSTGRADUATE	SE	Anambra	Ogbaru	Atani ward 1	Yes	PDP	6-10 yrs	No				No		No		No		SA											D	D	D	D	D	D	D	D	D	D	D	D	D	D
2024-04-29 16:32:34	46-55	Male	HND/BSC/(FIRST DEGREE)	SS	Edo	Etsako Central		Yes	PDP	16+ yrs	No				No		No		Yes	Electoral officer	SA	SA	SA	A	SA	SA	SA	SA	A	SA	SA	SA	D	D	A	SA	N	A	SA	D	SA	SA	SA	SA	SA
2024-04-29 16:40:46	36-45	Male	HND/BSC/(FIRST DEGREE)	SE	Anambra	Anambra-West	Umueze Anam Ward 2	Yes	APC	1-5 yrs	Yes	APGA	Non Inclusion in Decision-making		Yes	LG Executive	No		No		SA	A	A	N	SA	N	SA	SA	SA	N	N	SA	D	D	D	D	SA	D	N	SD	D	D	A	D	SD
2024-04-30 05:36:29	56-65	Male	POSTGRADUATE	SE	Anambra	Ekwusigo	2	No									No
2024-04-30 05:46:06	46-55	Male	POSTGRADUATE	SE	Anambra	Ayamelum	Umerum	Yes	PDP	16+ yrs	No				No		Yes	State Assembly	Yes	Chairman	SA	SA	SA	SA	SA	N	A	SA	A	A	A	A	SD	SD	SD	N	A	SD	SD	SD	D	D	SD	SD	N	N	N
2024-04-30 06:07:04	36-45	Male	POSTGRADUATE	SE	Anambra	Aguata	Umuchu ward 2	No	PDP	11-15 yrs	Yes		Imposition of Candidates		Yes	Ward Executive	No		No		SA	SA	D	SD	SA	D	N	SA	SA	SD	A		D	N	D	N	A	A	SD	A	SD	N	N	N	D	SD	D
2024-05-01 23:15:33	26-35	Male	POSTGRADUATE	SE	Anambra	Awka South	Amawbia 2	Yes	PDP	6-10 yrs	No	ZLP	Imposition of Candidates		Yes	State Executive	No		No		SA	SA	SA	A	SA	N	N	A	SA	N	SD	A	SD	N	N	SD	SA	N	A	N	SA	SA	SA	N	N	N	N
2024-05-03 03:12:31	26-35	Male	POSTGRADUATE	SE	Anambra	Anaocha	Aguluzigbo ward 1	Yes		6-10 yrs	No				No						SA	SA	A	A	SA	N	D	N	N	D	A	A	D	N	D	N	N	A	D	D	D	N	A	D	N	D	A
2024-05-12 17:55:04	36-45	Female	NCE/ND/TCII	SW	Ogun	Owode	Owede ward 7	Yes	APC	11-15 yrs	Yes	PDP	Hijack of Party Structure			LG Executive	Yes	State Assembly	Yes	Cabinet/Exco	SA	D	A	SA	SA	SD	SD	A	SA	SA	SD	SA	SD	D	SA	SD	SD	SA	SA	SD	N	A	A	N	N	A	SA
2024-05-13 01:07:41	46-55	Male	HND/BSC/(FIRST DEGREE)	SW	Ondo	Ilaje	Ward E	Yes	PDP	6-10 yrs	No				Yes	Ward Executive	No		No		A	A	D	A	SA	SD	A	A	SA	N	A	A	D	A	SD	N	SA	A	SD	SD	SA	A	A	N	D	A	A
2024-05-13 10:56:13	56-65	Male	HND/BSC/(FIRST DEGREE)	SW	Ogun	Abeokuta North	Atobaje Ward, Agege, Lagos	Yes	PDP	16+ yrs	Yes	PDP	Hijack of Party Structure		Yes	LG Executive	No		No		SA	SA	A	SA	SA	D	A	SA	SA	D	SA	A	SD	A	SD	A	SA	D	D	SD	A	SA	SA	SD	D	D	SA

## Sheet: Hypothesis Derivaition
	How does decentralized organizational structure impact on the membership stability of your Party?a
Questions	SA	A	N	D	SD			Average For Regression
1. My party has structures at the national, zonal, state, local and ward levels]	381	3	0	2	1			4.96641
2. In my party, power is distributed among national, state and local party Branches.]	234	143	2	8	0			4.55814
3. The Chapters/Branches effectively perform responsibilities assigned to them by the party constitution]	33	28	86	202	38			2.52455
4. Decentralized organizational structure could positively influence the recruitment and retention of members in a party	40	337	6	3	0			4.07254
5. Commitment of party members is enhanced when they participate in decision-making process of the party]	337	47	1	2	0			4.85788
6. My party allows individual members opinion in reaching decisions]	31	74	201	73	8			3.12145
7. I have always paid my monthly dues.]	93	221	59	13	0			4.02073
8 . Party leaders sometimes pay dues for members]	148	233	6	1	0			4.36082
9. Infact, party leaders finance the party activities and programmes]	330	53	4	0	1			4.83247
10. Not taking part in decision making affects the sense of party ownership and commitment among members]	161	42	11	127	46			3.37468
11. The centralized pattern of decision making in the party positively affects party membership stability]	32	179	27	52	97			2.99225
12.Granting of more autonomy to local party chapters/branches could positively impact in their ability to retain members and foster loyalty]	55	298	27	5	2			4.03101
	Are there significant differences in the relationships between decentralized party organization and inclusive local participation in decision making in your Party?
Questions	SA	A	N	D	SD			Average For Regression
1. Strong national party leadership’s control hinders the level of local autonomy in decision-making processes of our party]	16	152	85	95	38			3.03368
2. All Chapters/Branches of our party have reliable sources of funding]	20	40	73	215	39			2.44961
3.The nature of power distribution amongst our party Chapters/Branches ensures the inclusion of diverse local viewpoints in decision-making]	16	39	39	229	64			2.26098
4. The pattern of decision made at the Chapters/Branches of our party influences national party decision]	22	29	36	174	127			2.08505
5. The current structure of my party encourages members from diverse background to participate in decision making process]	58	151	30	140	7			3.29275
6. The conduct of party primaries by national leadership of our party discourages accountability of elected representatives to their local branches]	35	252	33	61	6			3.64341
7. Consideration of diverse viewpoints from Chapters/Branches could enhance greater participation in decision-making in a party]	23	169	19	19	59			3.2699
8. Strong national party leadership’s control of Chapters/Branches enhances greater members participation in party affairs]	21	21	23	164	159			1.9201
9. My party (from Ward to zonal levels) organizes congresses and primaries at various levels, without interference from the national leadership ]	57	53	57	172	47			2.74352
	How does the level of decentralization of party structures enhance their ideologies in Nigeria ?
Questions	SA	A	N	D	SD			Average For Regression
1. My party has a training institute where its policies and programs are developed]	89	104	148	46	0			3.60982
2. I know my parties ideologies policies and programs]	88	137	153	9	0			3.78553
3. I believe in the ideologies and work to achieve the policies and programs of my party. ]	62	147	107	62	8			3.5
4. National ,zonal and state leaders are trained at the institute]	31	89	135	126	5			3.03886
5. Party Chapter/Branches train and inculcate in members its policies and programs.]	21	61	122	165	17			2.7513
6. Effective distribution of power among party chapters and branches promotes understanding of party ideologies, policies and programs]	37	332	13	3	1			4.03886
	Hypothesis 1			SUMMARY OUTPUT
	Independent Variable (Level of Decentralization)	Question		Regression Statistics
	4.96641	Q1		Multiple R	0.211577
	4.55814	Q2		R Square	0.044765
	4.07254	Q4		Adjusted R Square	-0.273647
	4.85788	Q5		Standard Error	0.848585
	3.12145	Q6		Observations	5
				ANOVA
					df	SS	MS	F	Significance F
				Regression	1	0.101237	0.101237	0.140588	0.732635
	Dependent Variable (Membership Stability)	Question		Residual	3	2.16029	0.720096
	2.52455	Q3		Total	4	2.26153
	4.02073	Q7
	4.36082	Q8			Coefficients	Standard Error	t Stat	P-value	Lower 95%	Upper 95%	Lower 95%	Upper 95%
	4.83247	Q9		Intercept	3.69512	1.69697	2.17748	0.117627	-1.7054	9.09564	-1.7054	9.09564
	2.99225	Q11		Dependent Variable (Membership Stability)	0.165547	0.441516	0.374951	0.732635	-1.23956	1.57065	-1.23956	1.57065
	Hypothesis 2
			(APC VALUES)Are there significant differences in the relationships between decentralized party organization and inclusive local participation in decision making in your Party?
		Questions	SA	A	N	D	SD	AVERAGE
		1. Strong national party leadership’s control hinders the level of local autonomy in decision-making processes of our party]	1	73	49	45	22	2.92632
		2. All Chapters/Branches of our party have reliable sources of funding]	0	9	38	126	17	2.20526
		3.The nature of power distribution amongst our party Chapters/Branches ensures the inclusion of diverse local viewpoints in decision-making]	0	8	13	139	30	1.99474
		4. The pattern of decision made at the Chapters/Branches of our party influences national party decision]	0	5	15	108	62	1.80526
		5. The current structure of my party encourages members from diverse background to participate in decision making process]	26	83	11	69	1	3.33684
		6. The conduct of party primaries by national leadership of our party discourages accountability of elected representatives to their local branches]	4	139	16	30	1	3.60526
		7. Consideration of diverse viewpoints from Chapters/Branches could enhance greater participation in decision-making in a party]	0	86	3	3	33	3.136
		8. Strong national party leadership’s control of Chapters/Branches enhances greater members participation in party affairs]	0	1	11	103	75	1.67368
		9. My party (from Ward to zonal levels) organizes congresses and primaries at various levels, without interference from the national leadership ]	1	2	49	115	22	2.17989
			(PDP VALUES) Are there significant differences in the relationships between decentralized party organization and inclusive local participation in decision making in your Party?
		Questions	SA	A	N	D	SD	AVERAGE
		1. Strong national party leadership’s control hinders the level of local autonomy in decision-making processes of our party]	14	79	36	50	16	3.12821
		2. All Chapters/Branches of our party have reliable sources of funding]	19	31	35	89	22	2.67347
		3.The nature of power distribution amongst our party Chapters/Branches ensures the inclusion of diverse local viewpoints in decision-making]	15	31	26	90	34	2.5051
		4. The pattern of decision made at the Chapters/Branches of our party influences national party decision]	21	24	21	66	65	2.3401
		5. The current structure of my party encourages members from diverse background to participate in decision making process]	31	68	19	71	6	3.24103
		6. The conduct of party primaries by national leadership of our party discourages accountability of elected representatives to their local branches]	30	113	17	31	5	3.67347
		7. Consideration of diverse viewpoints from Chapters/Branches could enhance greater participation in decision-making in a party]	22	83	16	16	26	3.36196
		8. Strong national party leadership’s control of Chapters/Branches enhances greater members participation in party affairs]	20	20	12	61	84	2.14213
		9. My party (from Ward to zonal levels) organizes congresses and primaries at various levels, without interference from the national leadership ]	56	51	8	56	25	3.29082
								Using T TEST	0.20884
	Hypothesis 3
	Independent Variable (Level of Decentralization)	Question			SUMMARY OUTPUT
	4.96641	Q1
	4.55814	Q2			Regression Statistics
	4.07254	Q4			Multiple R	0.608823
	4.85788	Q5			R Square	0.370665
	3.12145	Q6			Adjusted R Square	0.160887
					Standard Error	0.688781
					Observations	5
					ANOVA
	Dependent Variable (Development and Articulation of Party Ideologies)	Question				df	SS	MS	F	Significance F
	3.60982	Q1			Regression	1	0.838269	0.838269	1.76694	0.275807
	3.78553	Q2			Residual	3	1.42326	0.474419
	3.5	Q3			Total	4	2.26153
	3.03886	Q4
	2.7513	Q5				Coefficients	Standard Error	t Stat	P-value	Lower 95%	Upper 95%	Lower 95%	Upper 95%
					Intercept	0.749303	2.7003	0.277489	0.799428	-7.84426	9.34287	-7.84426	9.34287
					Dependent Variable (Development and Articulation of Party Ideologies)	1.06859	0.803894	1.32926	0.275807	-1.48976	3.62694	-1.48976	3.62694

## Sheet: APC RESPONSE
Timestamp	1.Select Your Age bracket	2.Gender	3.Educational Attainment	4.Geopolitical Zone	5.State of Origin	6.Local Government Origin	7.Electoral Ward	8.Are you a member of a political party?	9.What is your party affiliation?	10. For how long have you been a member the party?	11. Have you ever changed your party membership?	12. If your answer to question 11 above is yes, please state the political party you changed from	13.Why did you change/defect?	14.Are you holding any party position currently or held any party position before: :	15.What was/is your position in the party (Note: If answer to the previous question is NO please ignore)	16.Have you been elected into any public office/position?	17.What is the position? (Note: If answer to the previous question is NO please ignore)	18.As a party man, have you ever been appointed to a public position?	19.What is/was the position?	How does decentralized organizational structure impact on the membership stability of your Party? Where: Strongly Agree (SA), Agree (A), Neutral (N), Disagree (D) and Strongly Disagree (SD) [1. My party has structures at the national, zonal, state, local and ward levels]	How does decentralized organizational structure impact on the membership stability of your Party? Where: Strongly Agree (SA), Agree (A), Neutral (N), Disagree (D) and Strongly Disagree (SD) [2. In my party, power is distributed among national, state and local party Branches.]	How does decentralized organizational structure impact on the membership stability of your Party? Where: Strongly Agree (SA), Agree (A), Neutral (N), Disagree (D) and Strongly Disagree (SD) [3. The Chapters/Branches effectively perform responsibilities assigned to them by the party constitution]	How does decentralized organizational structure impact on the membership stability of your Party? Where: Strongly Agree (SA), Agree (A), Neutral (N), Disagree (D) and Strongly Disagree (SD) [4. Decentralized organizational structure could positively influence the recruitment and retention of members in a party]	How does decentralized organizational structure impact on the membership stability of your Party? Where: Strongly Agree (SA), Agree (A), Neutral (N), Disagree (D) and Strongly Disagree (SD) [ 5. Commitment of party members is enhanced when they participate in decision-making process of the party]	How does decentralized organizational structure impact on the membership stability of your Party? Where: Strongly Agree (SA), Agree (A), Neutral (N), Disagree (D) and Strongly Disagree (SD) [6. My party allows individual members opinion in reaching decisions]	How does decentralized organizational structure impact on the membership stability of your Party? Where: Strongly Agree (SA), Agree (A), Neutral (N), Disagree (D) and Strongly Disagree (SD) [7. I have always paid my monthly dues.]	How does decentralized organizational structure impact on the membership stability of your Party? Where: Strongly Agree (SA), Agree (A), Neutral (N), Disagree (D) and Strongly Disagree (SD) [8 . Party leaders sometimes pay dues for members]	How does decentralized organizational structure impact on the membership stability of your Party? Where: Strongly Agree (SA), Agree (A), Neutral (N), Disagree (D) and Strongly Disagree (SD) [9. Infact, party leaders finance the party activities and programmes]	How does decentralized organizational structure impact on the membership stability of your Party? Where: Strongly Agree (SA), Agree (A), Neutral (N), Disagree (D) and Strongly Disagree (SD) [10. Not taking part in decision making affects the sense of party ownership and commitment among members]	How does decentralized organizational structure impact on the membership stability of your Party? Where: Strongly Agree (SA), Agree (A), Neutral (N), Disagree (D) and Strongly Disagree (SD) [11. The centralized pattern of decision making in the party positively affects party membership stability]	How does decentralized organizational structure impact on the membership stability of your Party? Where: Strongly Agree (SA), Agree (A), Neutral (N), Disagree (D) and Strongly Disagree (SD) [12.Granting of more autonomy to local party chapters/branches could positively impact in their ability to retain members and foster loyalty]	Are there significant differences in the relationships between decentralized party organization and inclusive local participation in decision making in your Party? Where: Strongly Agree (SA), Agree (A), Neutral (N), Disagree (D) and Strongly Disagree (SD) [1. Strong national party leadership’s control hinders the level of local autonomy in decision-making processes of our party]	Are there significant differences in the relationships between decentralized party organization and inclusive local participation in decision making in your Party? Where: Strongly Agree (SA), Agree (A), Neutral (N), Disagree (D) and Strongly Disagree (SD) [2. All Chapters/Branches of our party have reliable sources of funding]	Are there significant differences in the relationships between decentralized party organization and inclusive local participation in decision making in your Party? Where: Strongly Agree (SA), Agree (A), Neutral (N), Disagree (D) and Strongly Disagree (SD) [3. The nature of power distribution amongst our party Chapters/Branches ensures the inclusion of diverse local viewpoints in decision-making]	Are there significant differences in the relationships between decentralized party organization and inclusive local participation in decision making in your Party? Where: Strongly Agree (SA), Agree (A), Neutral (N), Disagree (D) and Strongly Disagree (SD) [4. The pattern of decision made at the Chapters/Branches of our party influences national party decision]	Are there significant differences in the relationships between decentralized party organization and inclusive local participation in decision making in your Party? Where: Strongly Agree (SA), Agree (A), Neutral (N), Disagree (D) and Strongly Disagree (SD) [5. The current structure of my party encourages members from diverse background to participate in decision making process]	Are there significant differences in the relationships between decentralized party organization and inclusive local participation in decision making in your Party? Where: Strongly Agree (SA), Agree (A), Neutral (N), Disagree (D) and Strongly Disagree (SD) [6. The conduct of party primaries by national leadership of our party discourages accountability of elected representatives to their local bra…	Are there significant differences in the relationships between decentralized party organization and inclusive local participation in decision making in your Party? Where: Strongly Agree (SA), Agree (A), Neutral (N), Disagree (D) and Strongly Disagree (SD) [7. Consideration of diverse viewpoints from Chapters/Branches could enhance greater participation in decision-making in a party]	Are there significant differences in the relationships between decentralized party organization and inclusive local participation in decision making in your Party? Where: Strongly Agree (SA), Agree (A), Neutral (N), Disagree (D) and Strongly Disagree (SD) [8. Strong national party leadership’s control of Chapters/Branches enhances greater members participation in party affairs]	Are there significant differences in the relationships between decentralized party organization and inclusive local participation in decision making in your Party? Where: Strongly Agree (SA), Agree (A), Neutral (N), Disagree (D) and Strongly Disagree (SD) [9. My party (from Ward to zonal levels) organizes congresses and primaries at various levels, without interference from the national leadershi…	How does the level of decentralization of party structures enhance their ideologies in Nigeria ? Where: Strongly Agree (SA), Agree (A), Neutral (N), Disagree (D) and Strongly Disagree (SD) [1. My party has a training institute where its policies and programs are developed]	How does the level of decentralization of party structures enhance their ideologies in Nigeria ? Where: Strongly Agree (SA), Agree (A), Neutral (N), Disagree (D) and Strongly Disagree (SD) [2. I know my parties ideologies policies and programs]	How does the level of decentralization of party structures enhance their ideologies in Nigeria ? Where: Strongly Agree (SA), Agree (A), Neutral (N), Disagree (D) and Strongly Disagree (SD) [3. I believe in the ideologies and work to achieve the policies and programs of my party. ]	How does the level of decentralization of party structures enhance their ideologies in Nigeria ? Where: Strongly Agree (SA), Agree (A), Neutral (N), Disagree (D) and Strongly Disagree (SD) [4. National ,zonal and state leaders are trained at the institute]	How does the level of decentralization of party structures enhance their ideologies in Nigeria ? Where: Strongly Agree (SA), Agree (A), Neutral (N), Disagree (D) and Strongly Disagree (SD) [5. Party Chapter/Branches train and inculcate in members its policies and programs.]	How does the level of decentralization of party structures enhance their ideologies in Nigeria ? Where: Strongly Agree (SA), Agree (A), Neutral (N), Disagree (D) and Strongly Disagree (SD) [6. Effective distribution of power among party chapters and branches promotes understanding of party ideologies, policies and programs]
2024-04-30 07:54:12	46-55	Female	HND/BSC/(FIRST DEGREE)	SS	Delta	Aniocha North	Onicha Olona	Yes	APC	6-10 yrs	Yes	PDP	Factionalization, Non Inclusion in Decision-making, Imposition of Candidates, Hijack of Party Structure	Yes	LG Executive	Yes	State Assembly	Yes	Cabinet/Exco	SA	D	SD	SA	SA	D	SA	SA	SA	SD	SA	SA	SD	SD	SD	SD	SA	SA	SD	SD	D	N	D	D	D	SD	SA		How does decentralized organizational structure impact on the membership stability of your Party?a
2024-05-17 19:10:31	56-65	Male	POSTGRADUATE	SS	Delta	Ethiope East	Agbona 111	Yes	APC	6-10 yrs	Yes	PDP	Hijack of Party Structure	Yes	LG Executive	No				SA	A	D	A	SA	A	A	A	SA	D	A	A	D	D	D	D	SA	A	SD	D	D	A	A	D	D	D	A	Questions	SA	A
2024-05-17 19:17:06	36-45	Female	HND/BSC/(FIRST DEGREE)	SS	Delta	Ika North East	Ovia 11	Yes	APC	6-10 yrs	Yes	PDP	Non Inclusion in Decision-making	Yes	State Executive	No				SA	A	D	A	SA	A	A	SA	SA	D	A	A	D	D	D	D	A	A	D	D	D	A	N	D	N	D	A	1. My party has structures at the national, zonal, state, local and ward levels]	190	0
2024-05-17 19:23:55	56-65	Male	WAEC/NECO	SS	Delta	Ethiope West	Jesse 11	Yes	APC	6-10 yrs	No			Yes	State Executive	No		No		SA	A	D	A	SA	A	A	SA	SA	D	A	SA	D	D	D	D	A	A	SD	SD	D	A	A	SD	D	D	A	2. In my party, power is distributed among national, state and local party Branches.]	106	79
2024-05-17 19:29:51	46-55	Female	HND/BSC/(FIRST DEGREE)	SS	Delta	Ika South	Agbor 11	Yes	APC	6-10 yrs	No			Yes	State Executive	No				SA	A	D	A	SA	A	A	SA	SA	D	A	SA	D	D	D	D	A	A	D	D	D	N	N	D	D	D	A	3. The Chapters/Branches effectively perform responsibilities assigned to them by the party constitution]	0	8
2024-05-17 19:36:12	26-35	Male	HND/BSC/(FIRST DEGREE)	SS	Delta	Ndokwa West	Abbi 1	Yes	APC	1-5 yrs	No			Yes	Ward Executive	No		No		SA	A	D	A	SA	N	A	SA	SA	D	A	SA	D	D	D	D	A	A	SD	SD	D	N	N	SD	SD	D	A	4. Decentralized organizational structure could positively influence the recruitment and retention of members in a party	4	185
2024-05-17 19:42:38	36-45	Male	HND/BSC/(FIRST DEGREE)	SS	Delta	Udu	Aladja	Yes	APC	6-10 yrs	No			Yes	LG Executive	No		No		SA	A	D	A	SA	N	A	SA	SA	D	A	SA	D	D	D	D	A	A	D	SD	D	N	N	D	N	D	A	5. Commitment of party members is enhanced when they participate in decision-making process of the party]	164	26
2024-05-17 19:48:45	18-25	Male	WAEC/NECO	SS	Delta	Ndokwa West	Ogume 1	Yes	APC	1-5 yrs	No			Yes	Ward Executive	No		No		SA	A	SD	A	SA	N	A	SA	SA	D	A	SA	D	D	D	D	A	A	SD	D	SD	D	N	SD	D	D	A	6. My party allows individual members opinion in reaching decisions]	1	37
2024-05-17 20:01:38	46-55	Female	NCE/ND/TCII	NC	Nasarawa	Keana	Iwagu	Yes	APC	1-5 yrs	Yes	PDP	Non Inclusion in Decision-making, Hijack of Party Structure	Yes	LG Executive	No		No		SA	A	D	A	SA	N	A	SA	SA	D	A	SA	D	D	D	D	A	A	D	D	SA	N	N	A	D	D	A	7. I have always paid my monthly dues.]	39	124
2024-05-17 20:09:50	46-55	Female	HND/BSC/(FIRST DEGREE)	SS	Delta	Warri South Weat	Oporoza	Yes	APC	6-10 yrs	No			No		No				SA	A	D	A	SA	N	A	SA	SA	D	A	A	D	D	D	D	A	A	D	D	D	N	N	N	D	D	A	8 . Party leaders sometimes pay dues for members]	72	118
2024-05-17 20:18:10	46-55	Male	NCE/ND/TCII	SS	Delta	Uvwie	Ekpan 1	Yes	APC	6-10 yrs	No			No		No		No		SA	A	D	A	SA	N	A	SA	SA	D	A	A	D	D	D	D	A	A	D	D	D	N	N	D	D	D	N	9. Infact, party leaders finance the party activities and programmes]	169	21
2024-05-18 09:38:20	36-45	Female	NCE/ND/TCII	NE	Adamawa	Fufore	Karlahi	Yes	APC	6-10 yrs	Yes	PDP	Imposition of Candidates, Hijack of Party Structure	Yes	State Executive	Yes	State Assembly	No		SA	A	D	A	SA	A	A	SA	SA	D	A	SA	N	D	D	D	A	A	D	D	D	N	N	D	D	D	A	10. Not taking part in decision making affects the sense of party ownership and commitment among members]	72	16
2024-05-18 09:45:58	26-35	Male	WAEC/NECO	NE	Adamawa	Ganye	Yebbi	Yes	APC	1-5 yrs	No			Yes	Ward Executive	No				SA	D	D	A	SA	N	A	SA	SA	SD	A	A	N	D	D	D	SA	A	SD	D	D	N	N	D	D	SD	A	11. The centralized pattern of decision making in the party positively affects party membership stability]	2	98
2024-05-18 10:29:29	56-65	Male	HND/BSC/(FIRST DEGREE)	SS	Delta	Aniocha South	Ubulu Uku	Yes	APC	6-10 yrs	Yes	PDP	Imposition of Candidates	No		Yes	State Assembly	Yes	Adviser/Assistant	SA	A	D	A	SA	A	A	SA	A	D	A	A	D	D	D	D	A	A	D	D	D	A	A	D	D	D	A	12.Granting of more autonomy to local party chapters/branches could positively impact in their ability to retain members and foster loyalty]	17	160
2024-05-18 10:34:28	36-45	Female	WAEC/NECO	SS	Delta	Ika South	Agbor 11	Yes	APC	6-10 yrs	No			No		No		No		SA	D	D	A	SA	N	A	SA	SA	D	A	A	N	D	D	D	SA	A	SD	SD	D	N	N	D	D	SD	A
2024-05-18 10:42:07	26-35	Female	HND/BSC/(FIRST DEGREE)	NE	Adamawa	Madagali	Wagga	Yes	APC	1-5 yrs	Yes	PDP	Non Inclusion in Decision-making, Imposition of Candidates	Yes	LG Executive	No		No		SA	A	D	A	SA	N	A	A	SA	D	A	SA	N	D	D	D	A	A	D	D	D	N	N	D	D	D	A		Are there significant differences in the relationships between decentralized party organization and inclusive local participation in decision making in your Party?
2024-05-18 10:49:06	66 and above	Male	POSTGRADUATE	NE	Adamawa	Michika	Bazza Margi	Yes	APC	6-10 yrs	Yes	ANPP		Yes	Zonal Executive	Yes	State Assembly	No		SA	A	D	A	SA	A	A	SA	SA	SD	A	A	N	D	D	D	A	A	D	D						D		Questions	SA	A
2024-05-18 10:54:13	36-45	Female	NCE/ND/TCII	NE	Adamawa	Mubi North	Sabon Layi	Yes	APC	6-10 yrs	No			Yes	State Executive	No		No		SA	A	D	A	SA	N	A	SA	SA	D	A	A	N	D	D	D	SA	A	D	D	D	N	N	D	D	N	A	1. Strong national party leadership’s control hinders the level of local autonomy in decision-making processes of our party]	1	73
2024-05-18 11:01:28	36-45	Female	WAEC/NECO	NE	Adamawa	Hong	Garaha	Yes	APC	1-5 yrs	Yes	PDP	Imposition of Candidates	Yes	Ward Executive	No		No		SA	A	D	A	SA	N	A	SA	SA	D	A	A	N	D	D	D	A	A	SD	D	D	N	N	D	N	D	A	2. All Chapters/Branches of our party have reliable sources of funding]	0	9
2024-05-18 11:50:23	36-45	Male	HND/BSC/(FIRST DEGREE)	NE	Adamawa	Demsa	Gwamba	Yes	APC	1-5 yrs	Yes	PDP	Non Inclusion in Decision-making, Imposition of Candidates	Yes	State Executive	No		No		SA	A	D	A	SA	A	A	SA	SA	D	A	A	N	D	D	D	SA	A	D	D	D	A	A	D	D	N	A	3.The nature of power distribution amongst our party Chapters/Branches ensures the inclusion of diverse local viewpoints in decision-making]	0	8
2024-05-18 11:55:12	46-55	Female	HND/BSC/(FIRST DEGREE)	NE	Adamawa	Jada	Yelli	Yes	APC	6-10 yrs	No			Yes	State Executive	No		No		SA	A	D	A	SA	A	A	SA	SA	D	A	A	N	D	D	D	SA	A	D	D	D	A	A	N	D	D	A	4. The pattern of decision made at the Chapters/Branches of our party influences national party decision]	0	5
2024-05-18 12:00:40	36-45	Female	WAEC/NECO	NE	Adamawa	Girie	Damare	Yes	APC	6-10 yrs	No			Yes	LG Executive	No		No		SA	A	D	A	SA	A	A	SA	SA	D	A	A	N	D	D	D	A	A	D	D	D	A	A	D	N	D	A	5. The current structure of my party encourages members from diverse background to participate in decision making process]	26	83
2024-05-18 12:07:05	26-35	Female	NCE/ND/TCII	NE	Adamawa	Guyuk	Chikila	Yes	APC	6-10 yrs	No			Yes	LG Executive	No		No		SA	A	D	A	SA	A	A	SA	A	D	A	A	N	D	D	D	A	A	D	D	D	N	N	D	N	D	A	6. The conduct of party primaries by national leadership of our party discourages accountability of elected representatives to their local branches]	4	139
2024-05-18 12:18:05	56-65	Male	NCE/ND/TCII	NC	Nasarawa	Keffi	Gangare Tudu	Yes	APC	1-5 yrs	Yes	APGA	Imposition of Candidates, Hijack of Party Structure	Yes	LG Executive	No		No		SA	A	D	A	SA	N	A	SA	SA	D	A	A	N	D	D	D	A	A	D	D	D	N	N	D	D	D	A	7. Consideration of diverse viewpoints from Chapters/Branches could enhance greater participation in decision-making in a party]	0	86
2024-05-18 12:30:13	26-35	Male	WAEC/NECO	NE	Adamawa	Guyuk	Guyuk	Yes	APC	6-10 yrs	No			Yes	Ward Executive	No		No		SA	A	D	A	SA	N	A	SA	SA	D	A	A	D	D	D	D	A	A	D	D	D	N	N	N	N	D	A	8. Strong national party leadership’s control of Chapters/Branches enhances greater members participation in party affairs]	0	1
2024-05-18 15:35:56	36-45	Female	WAEC/NECO	NC	Nasarawa	Doma	Agbashi	Yes	APC	6-10 yrs	No			Yes	Ward Executive	No		No		SA	N	D	A	SA	N	A	SA	SA	SD	A	A	D	D	D	D	SA	A	D	D	D	N	N	N	D	D	A	9. My party (from Ward to zonal levels) organizes congresses and primaries at various levels, without interference from the national leadership ]	1	2
2024-05-18 15:42:04	36-45	Male	WAEC/NECO	NC	Nasarawa	Lafia	Assakio	Yes	APC	6-10 yrs	Yes	PDP	Imposition of Candidates, Hijack of Party Structure	Yes	LG Executive	No		Yes	Adviser/Assistant	SA	A	D	A	SA	N	A	SA	SA	D	A	A	D	D	D	D	SA	A	SD	SD	D	N	N	N	D	N	A		How does the level of decentralization of party structures enhance their ideologies in Nigeria ?
2024-05-18 15:51:22	46-55	Male	WAEC/NECO	NC	Nasarawa	Karu	Kokona	Yes	APC	6-10 yrs	No			Yes	LG Executive	No		No		SA	A	D	A	SA	N	A	SA	SA	SD	A	A	N	D	D	D	SA	A	SD	SD	D	A	N	N	D	D	A	Questions	SA	A
2024-05-18 15:57:35	46-55	Male	HND/BSC/(FIRST DEGREE)	NC	Nasarawa	Wamba	Wayo	Yes	APC	1-5 yrs	No			No		No		No		SA	A	D	A	SA	A	A	SA	SA	D	A	A	N	SD	SD	D	SA	A	SD	SD	D	N	N	D	D	D	A	1. My party has a training institute where its policies and programs are developed]	1	29
2024-05-18 16:07:13	18-25	Male	WAEC/NECO	NC	Nasarawa	Doma	Galadima	Yes	APC	1-5 yrs	No			No		No		No		SA	A	D	A	SA	N	A	SA	SA	D	A	A	N	D	D	D	SA	A	SD	SD	D	N	N	N	N	D	A	2. I know my parties ideologies policies and programs]	23	64
2024-05-18 16:11:59	36-45	Female	HND/BSC/(FIRST DEGREE)	NC	Nasarawa	Awe	Tunga	Yes	APC	6-10 yrs	No			Yes	Zonal Executive	No		Yes	Adviser/Assistant	SA	A	N	A	SA	A	A	SA	SA	D	A	SA	N	D	D	D	A	A	SD	D	N	A	A	N	N	N	A	3. I believe in the ideologies and work to achieve the policies and programs of my party. ]	19	44
2024-05-18 17:53:07	56-65	Male	HND/BSC/(FIRST DEGREE)	NC	Nasarawa	Lafia	Assakio	Yes	APC	6-10 yrs	Yes	ANPP	Factionalization, Hijack of Party Structure	Yes	National Executive	Yes	State Assembly	Yes	Cabinet/Exco	SA	SA	A	A	SA	SA	A	SA	A	A	N	D	A	N	A	A	D	A	A	A	N	SA	SA	D	A	A	A	4. National ,zonal and state leaders are trained at the institute]	0	1
2024-05-18 18:07:52	36-45	Female	WAEC/NECO	NC	Nasarawa	Obi	Agwatashi	Yes	APC	6-10 yrs	No			No		No		Yes	Adviser/Assistant	SA	A	D	A	SA	N	A	SA	SA	D	A	A	N	D	D	D	A	A	D	D	D	N	N	D	N	D	A	5. Party Chapter/Branches train and inculcate in members its policies and programs.]	0	1
2024-05-18 18:16:55	46-55	Female	NCE/ND/TCII	NC	Nasarawa	Nasarawa Egon	Agwuji/ Pgbagi	Yes	APC	6-10 yrs	No			No		No		Yes	Boards	SA	A	D	A	SA	N	A	SA	SA	D	A	A	N	D	D	D	SA	A	D	D	D	N	N	N	D	N	A	6. Effective distribution of power among party chapters and branches promotes understanding of party ideologies, policies and programs]	7	176
2024-05-18 20:05:25	36-45	Female	NCE/ND/TCII	NC	Nasarawa	Akwanga	Andcha	Yes	APC	6-10 yrs	No			Yes	State Executive	No		Yes	Boards	SA	A	D	A	SA	A	A	SA	SA	D	A	A	N	D	D	D	SA	A	D	D	D	A	N	N	N	D	A
2024-05-18 20:14:35	26-35	Female	NCE/ND/TCII	NC	Nasarawa	Keffi	Gangare Tudu	Yes	APC	1-5 yrs	No			Yes	Ward Executive	No		No		SA	N	D	A	SA	N	A	SA	SA	D	A	SA	D	D	D	D	SA	A	D	D	N	N	N	N	D	D	A
2024-05-18 20:20:29	56-65	Female	POSTGRADUATE	NC	Nasarawa	Lafia	Nasarawa	Yes	APC	6-10 yrs	Yes	PDP	Imposition of Candidates, Hijack of Party Structure	No				Yes	Adviser/Assistant	SA	A	D	A	SA	A	A	SA	SA	D	A	A	N	D	D	D	A	A	D	D	N	A	A	N	N	D	A
2024-05-18 20:25:45	46-55	Male	HND/BSC/(FIRST DEGREE)	NC	Nasarawa	Keana	Iwagu	Yes	APC	6-10 yrs	No			No		No		No		SA	A	D	A	SA	N	A	SA	SA	D	N	A	D	D	D	D	A	A	D	D	N	N	N	N	D	D	A
2024-05-19 04:35:23	36-45	Male	HND/BSC/(FIRST DEGREE)	NE	Adamawa	Yola South	Mbamoi	Yes	APC	6-10 yrs	No			Yes	State Executive	No		No		SA	A	D	A	SA	A	A	SA	SA	D	A	A	N	N	N	N	A	A	D	D	D	A	A	N	N	D	A
2024-05-19 04:40:22	26-35	Female	NCE/ND/TCII	NE	Adamawa	Shelleng	Kiri	Yes	APC	6-10 yrs	No			Yes	LG Executive	No		No		SA	SA	D	A	SA	N	A	SA	SA	D	A	A	N	D	D	D	A	A	D	D	N	N	N	D	D	D	A
2024-05-19 04:44:45	26-35	Female	WAEC/NECO	NE	Adamawa	Numan	Numan 11	Yes	APC	1-5 yrs	No			Yes	Ward Executive	No		No		SA	SA	D	A	SA	N	A	SA	A	D	A	A	D	D	D	D	A	A	D	D	D	N	N	D	D	D	A	How does decentralized organizational structure impact on the membership stability of your Party?
2024-05-19 04:49:29	56-65	Male	FSLC	NE	Adamawa	Shelleng	Kiri	Yes	APC	1-5 yrs	No			Yes	Ward Executive	No		No		SA	SA	D	A	SA	N	A	SA	SA	D	A	A	SD	SD	SD	SD	SA	A	SD	SD	D	N	N	D	D	D	A
2024-05-19 04:55:15	36-45	Female	FSLC	NE	Adamawa	Numan	Gamadio	Yes	APC	6-10 yrs	Yes	SDP	Imposition of Candidates, Hijack of Party Structure	No		No		No		SA	SA	D	A	SA	N	A	A	SA	D	A	A	N	N	N	N	A	A	D	SD	N	N	N	N	N	N	A
2024-05-19 07:51:56	18-25	Male	WAEC/NECO	NE	Adamawa	Demsa	Dong	Yes	APC	1-5 yrs	No			No		No				SA	SA	D	A	SA	N	A	SA	SA	SD	A	A	D	D	D	D	SA	A	SD	SD	D	N	N	D	N	SD	A
2024-05-19 07:56:31	46-55	Female	WAEC/NECO	NE	Adamawa	Ganye	Ganye 11	Yes	APC	6-10 yrs	No			No		No		No		SA	A	N	A	SA	N	A	SA	SA	D	A	A	D	D	SD	SD	SA	A	SD	SD	N	N	N	N	D	D	A
2024-05-19 08:05:51	26-35	Male	WAEC/NECO	NE	Adamawa	Guyuk	Chikila	Yes	APC	1-5 yrs	No			No		No		No		SA	SA	D	A	SA	N	A	A	SA	SD	A	A	N	D	D	D	SA	A	SD	D	D	N	N	D	D	N	SA
2024-05-19 08:11:44	66 and above	Female	WAEC/NECO	NE	Adamawa	Mubi North	Digil	Yes	APC	6-10 yrs	Yes	PDP	Imposition of Candidates	No		Yes	Ward Councilor	Yes	LGA Supervisor	SA	SA	D	A	SA	A	A	SA	SA	D	A	A	SD	D	D	D	A	A	SD	D	D	N	N	D	D	SD	A
2024-05-19 08:16:38	36-45	Female	FSLC	NE	Adamawa	Madagali	Wagga	Yes	APC	6-10 yrs	No			No		No		No		SA	SA	SD	A	SA	N	A	SA	SA	SD	A	A	SD	D	SD	D	A	A	SD	D	D	N	N	D	D	D	A
2024-05-19 08:29:55	46-55	Female	WAEC/NECO	NE	Adamawa	Jada	Mbulo	Yes	APC	1-5 yrs	No			No		No		No		SA	SA	D	A	SA	N	A	SA	SA	D	A	A	SD	D	D	D	SA	A	SD	D	N	N	N	D	N	D	A
2024-05-19 10:44:48	36-45	Female	WAEC/NECO	NE	Adamawa	Guyuk	Dumna	Yes	APC	6-10 yrs	No			No		No		No		SA	SA	D	A	SA	N	A	SA	SA	SD	A	A	D	D	SD	SD	SA	A	SD	D	D	N	N	D	N	D	A
2024-05-19 10:49:27	26-35	Male	WAEC/NECO	NE	Adamawa	Ganye	Gamu	Yes	APC	1-5 yrs	No			No		No		No		SA	A	D	A	SA	N	A	SA	SA	D	A	A	SD	SD	SD	SD	SA	A	SD	D	D	N	N	D	N	D	A
2024-05-19 10:53:34	46-55	Female	FSLC	NE	Adamawa	Larmude	Waduku	Yes	APC	6-10 yrs	No			No		No		No		SA	SA	SD	A	SA	N	A	SA	SA	SD	A	SA	D	D	D	D	A	A	D	D	N	N	N	D	D	SD	A
2024-05-19 11:17:04	26-35	Female	FSLC	NE	Adamawa	Yola North	Nassarawo	Yes	APC	1-5 yrs	No			No		No		No		SA	SA	SD	A	SA	N	A	SA	SA	SD	A	SA	D	D	D	D	SA	A	D	SD	N	N	N	D	N	D	A
2024-05-19 11:53:12	36-45	Female	NCE/ND/TCII	NC	Nasarawa	Obi	Aududu	Yes	APC	6-10 yrs	Yes	PDP	Non Inclusion in Decision-making, Imposition of Candidates, Hijack of Party Structure	Yes	State Executive	No		Yes	Boards	SA	A	D	A	SA	A	A	SA	SA	SD	A	SA	N	D	SD	D	A	A	SD	D	D	A	A	D	N	D	A
2024-05-19 11:57:13	46-55	Male	HND/BSC/(FIRST DEGREE)	NC	Nasarawa	Toto	Katakpa	Yes	APC	6-10 yrs	No			Yes	State Executive	No		No		SA	A	D	A	SA	A	A	SA	SA	SD	A	SA	N	D	D	D	A	A	D	D	D	A	A	D	N	D	A
2024-05-19 12:02:16	18-25	Female	WAEC/NECO	NC	Nasarawa	Kokona	Garuku	Yes	APC	1-5 yrs	No			Yes	Ward Executive	No		No		SA	A	D	A	SA	N	A	A	SA	SD	A	A	SD	D	D	D	A	A	D	D	N	N	N	N	N	D	A
2024-05-19 12:07:06	26-35	Female	WAEC/NECO	NC	Nasarawa	Karu	Karshi 11	Yes	APC	1-5 yrs	No			Yes	Ward Executive	No		No		SA	A	D	A	SA	N	A	SA	SA	SD	A	A	N	D	D	D	A	A	D	D	N	N	N	N	D	D	A
2024-05-19 12:12:48	26-35	Female	FSLC	NC	Nasarawa	Lafia	Zanwa	Yes	APC	1-5 yrs	Yes	PDP	Imposition of Candidates	No		No		No		SA	A	D	A	SA	N	A	A	SA	SD	A	A	D	D	D	D	A	A	D	D	N	N	N	N	D	D	A
2024-05-19 12:17:08	36-45	Female	WAEC/NECO	NC	Nasarawa	Lafia	Chiroma	Yes	APC	1-5 yrs	No			No		No		No		SA	A	SD	A	SA	N	A	SA	SA	SD	A	A	D	D	D	D	A	A	D	SD	D	N	N	D	D	SD	A
2024-05-19 12:24:17	66 and above	Male	WAEC/NECO	NC	Nasarawa	Akwanga	Akwanga west	Yes	APC	1-5 yrs	Yes	PDP	Imposition of Candidates	No		No		No		SA	A	D	A	SA	N	A	SA	SA	D	A	SA	D	D	SD	D	SA	A	SD	D	N	N	N	D	D	SD	A
2024-05-19 12:29:49	36-45	Female	NCE/ND/TCII	NC	Nasarawa	Karu	Guruku	Yes	APC	6-10 yrs	No			Yes	State Executive	No		Yes	Adviser/Assistant	SA	SA	SD	A	SA	A	A	SA	SA	D	A	A	D	D	D	D	A	A	D	D	D	A	A	N	N	D	A
2024-05-19 12:34:29	36-45	Female	WAEC/NECO	NC	Nasarawa	Akwanga	Gudi	Yes	APC	1-5 yrs	No			No		No		No		SA	SA	D	A	SA	N	A	SA	SA	D	A	A	SD	D	D	D	A	A	D	SD	D	N	N	D	D	D	A
2024-05-19 12:39:55	46-55	Male	WAEC/NECO	NC	Nasarawa	Keffi	Angwan Iya 11	Yes	APC	1-5 yrs	No			No		No		No		SA	A	SD	A	SA	N	A	A	SA	SD	A	A	D	D	SD	D	SA	A	D	SD	D	N	N	D	N	SD	A
2024-05-21 09:29:43	66 and above	Female	POSTGRADUATE	SS	Delta	Aniocha North	Onicha Ugbo	Yes	APC	6-10 yrs	Yes	PDP	Imposition of Candidates	Yes	LG Executive	No		Yes	Boards	SA	A	N	A	SA	A	A	SA	SA	SD	A	A	N	D	SD	D	A	A	D	D	D	A	A	N	N	N	N
2024-05-21 09:40:32	26-35	Female	NCE/ND/TCII	SS	Delta	Bomadi	Kpakiama	Yes	APC	1-5 yrs	No			No		No		No		SA	A	D	A	SA	N	A	SA	SA	D	A	A	D	D	SD	D	A	A	D	D	N	N	N	N	D	N	A
2024-05-21 09:48:30	36-45	Male	WAEC/NECO	SS	Delta	Ethiope East	Agbona V111	Yes	APC	6-10 yrs	No			Yes	LG Executive	No		No		SA	SA	N	A	SA	N	A	A	SA	D	A	A	N	D	D	D	A	A	D	D	N	N	N	D	D	N	A
2024-05-21 09:58:52	26-35	Female	WAEC/NECO	SS	Delta	Patani	Abbari	Yes	APC	6-10 yrs	Yes	PDP	Imposition of Candidates	Yes	Ward Executive	No		No		SA	A	D	A	SA	D	A	SA	SA	D	A	A	N	D	D	D	A	A	D	D	N	N	N	N	N	D	A
2024-05-21 10:26:05	36-45	Female	HND/BSC/(FIRST DEGREE)	SS	Delta	Ughelli South	Ewu 11	Yes	APC	1-5 yrs	No			No		No		No		SA	A	D	A	SA	D	A	A	SA	D	A	A	D	D	D	D	A	A	D	D	N	N	N	N	N	D	A
2024-05-21 11:03:49	36-45	Female	HND/BSC/(FIRST DEGREE)	SS	Delta	Oshimili North	Ibusa 111	Yes	APC	1-5 yrs	No			No		No		No		SA	SA	D	A	SA	D	N	A	A	D	A	A	D	D	D	D	A	A	D	D	N	N	N	D	D	N	A
2024-05-21 11:30:18	26-35	Female	WAEC/NECO	SS	Delta	Ndokwa West	Abbi 11	Yes	APC	1-5 yrs	No			No		No		No		SA	A	D	A	SA	D	A	SA	SA	D	A	A	D	D	D	D	A	A	D	D	D	N	N	D	N	N	A
2024-05-22 21:55:35	56-65	Female	HND/BSC/(FIRST DEGREE)	SS	Delta	Ukwuani	Obiaruku 1	Yes	APC	6-10 yrs	Yes	PDP	Hijack of Party Structure	No		Yes	Ward Councilor	Yes	Adviser/Assistant	SA	SA	D	A	SA	N	A	A	SA	D	A	A	SD	D	SD	D	A	A	D	D	N	N	N	D	D	D	A
2024-05-22 22:00:33	66 and above	Male	HND/BSC/(FIRST DEGREE)	SS	Delta	Ughelli North	Ughelli 1	Yes	APC	1-5 yrs	Yes	PDP	Imposition of Candidates	No		No		Yes	Boards	SA	SA	D	A	SA	A	A	A	SA	D	A	A	SD	D	SD	D	A	A	D	D	N	N	N	D	D	D	A
2024-05-22 22:06:20	46-55	Male	WAEC/NECO	SS	Delta	Isoko North	Ozoro 111	Yes	APC	1-5 yrs	No			No		No		No		SA	A	D	A	SA	N	A	SA	SA	D	A	A	SD	D	SD	D	A	A	D	D	D	N	N	D	D	D	A
2024-05-30 16:50:37	26-35	Female	NCE/ND/TCII	SE	Imo	Owerri Municipal	Ikenegbu 11	Yes	APC	1-5 yrs	No			No		No		No		SA	A	D	A	SA	D	A	A	A	D	A	A	SD	D	D	D	A	A	SD	D	N	N	N	D	D	D	N	Are there significant differences in the relationships between decentralized party organization and inclusive local participation in decision making in your Party?
2024-05-30 16:59:30	36-45	Male	HND/BSC/(FIRST DEGREE)	SE	Imo	Orsu	Amaruru	Yes	APC	6-10 yrs	Yes	PDP	Factionalization	No		Yes	Ward Councilor	Yes	Adviser/Assistant	SA	A	N	A	SA	D	A	SA	SA	SD	A	A	D	D	SD	D	A	A	D	D	D	A	A	D	D	D	A
2024-05-30 17:08:37	46-55	Female	HND/BSC/(FIRST DEGREE)	SE	Imo	Orlu	Amaifeke	Yes	APC	6-10 yrs	Yes	PDP	Imposition of Candidates	No		Yes	State Assembly	Yes	Adviser/Assistant	SA	A	N	A	SA	A	A	SA	SA	D	A	A	D	D	SD	D	A	A	D	D	N	A	N	N	D	D	A
2024-05-30 17:21:00	36-45	Male	HND/BSC/(FIRST DEGREE)	SE	Imo	Aboh Mbaise	Mbutu	Yes	APC	6-10 yrs	No			Yes	LG Executive			Yes	Boards	SA	A	D	A	SA	N	A	A	SA	D	A	A	D	D	D	D	A	A	D	SD	N	A	A	N	N	N	A
2024-05-30 17:27:41	36-45	Female	NCE/ND/TCII	SE	Imo	Ehime Mbano	Umueze 11	Yes	APC	6-10 yrs	No			No		No		Yes	Adviser/Assistant	SA	A	D	A	SA	N	A	A	A	SD	A	A	SD	D	SD	D	A	A	D	D	N	N	N	N	D	N	N
2024-05-30 20:06:02	18-25	Male	HND/BSC/(FIRST DEGREE)	SE	Imo	Ikeduru	Iho	Yes	APC	1-5 yrs	No			No		No		No		SA	SA	D	A	SA	D	A	A	SA	SD	A	A	SD	D	D	D	A	A	SD	D	N	N	N	N	N	D	A
2024-05-30 20:34:18	46-55	Female	NCE/ND/TCII	SE	Imo	Nkwerre	Omaopara	Yes	APC	1-5 yrs	Yes	PDP	Factionalization, Hijack of Party Structure	No		No		Yes	Boards	SA	A	D	A	SA	N	A	A	SA	D	A	A	SD	D	D	D	A	A	D	D	N	N	N	N	D	D	A
2024-05-30 20:39:12	26-35	Female	HND/BSC/(FIRST DEGREE)	SE	Imo	Nwangele	Umuozu	Yes	APC	1-5 yrs	No			No		No		No		SA	A	SD	A	SA	D	N	A	SA	SD	N	A	SD	D	SD	D	A	A	SD	SD	N	N	N	N	D	D	A
2024-05-30 21:41:44	36-45	Female	HND/BSC/(FIRST DEGREE)	SE	Imo	Onuimo	Eziama	Yes	APC	6-10 yrs	No			Yes	LG Executive	No		Yes	Boards	SA	A	D	A	SA	N	A	A	SA	D	A	A	D	D	SD	D	A	A	SD	SD	N	N	N	D	D	D	A
2024-05-30 21:58:21	26-35	Female	HND/BSC/(FIRST DEGREE)	SE	Imo	Okigwe	Ihube	Yes	APC	6-10 yrs	No			No		No		Yes	Boards	SA	SA	D	A	SA	N	A	SA	SA	D	A	A	D	D	SD	D	A	A	D	SD	N	N	N	D	D	N	A
2024-05-30 22:08:57	46-55	Female	HND/BSC/(FIRST DEGREE)	SE	Imo	Oguta	Awa	Yes	APC	1-5 yrs	No			Yes	State Executive	No	President	No		SA	SA	D	A	SA	A	A	SA	SA	D	A	A	D	D	D	D	A	A	D	SD	N	N	N	D	D	D	A
2024-05-30 22:19:53	36-45	Female	HND/BSC/(FIRST DEGREE)	SE	Imo	Oru East	Amiri	Yes	APC	6-10 yrs	No			Yes	State Executive	No		Yes	Boards	SA	A	D	A	SA	A	A	SA	SA	D	SA	A	D	D	SD	D	A	A	D	SD	N	A	A	N	D	D	A
2024-05-30 23:12:12	18-25	Female	NCE/ND/TCII	SE	Imo	Oru West	Ozara	Yes	APC	1-5 yrs	No			Yes	Ward Executive	No		No		SA	A	SD	A	SA	N	A	A	SA	SD	A	SA	SD	SD	SD	SD	SA	A	SD	SD	N	N	N	N	D	SD	A
2024-05-30 23:17:51	26-35	Female	WAEC/NECO	SE	Imo	Owerri North	Egbu	Yes	APC	1-5 yrs	No			Yes	Ward Executive	No		No		SA	SA	SD	A	SA	D	A	A	SA	SD	A	A	SD	D	D	D	A	A	SD	SD	N	N	N	D	D	SD	SA
2024-05-30 23:26:12	36-45	Male	HND/BSC/(FIRST DEGREE)	SE	Imo	Owerri West	Nekede	Yes	APC	6-10 yrs	No			Yes	State Executive	No		Yes	Boards	SA	SA	D	A	SA	A	A	SA	SA	SD	A	A	D	D	SD	D	A	A	D	SD	N	A	A	N	N	D	A
2024-05-30 23:35:00	46-55	Male	HND/BSC/(FIRST DEGREE)	SE	Imo	Oguta	Izombe	Yes	APC	6-10 yrs	Yes	PDP	Factionalization	Yes	LG Executive	Yes	Ward Councilor	No		SA	A	D	A	SA	N	A	A	SA	D	A	A	D	D	D	D	A	D	SD	SD	N	N	N	N	D	D	A
2024-05-30 23:43:19	26-35	Female	NCE/ND/TCII	SE	Imo	Ideato North	Isiokpa	Yes	APC	1-5 yrs	No			Yes	LG Executive	No		No		SA	SA	D	A	SA	N	A	A	SA	SD	A	A	D	D	SD	D	A	A	SD	SD	N	A	N	D	D	D	A
2024-05-31 06:00:00	36-45	Female	HND/BSC/(FIRST DEGREE)	SE	Imo	Ahiazu Mbaise	Obohia Ekwerazu	Yes	APC	6-10 yrs	No			Yes	Ward Executive	No		No		SA	A	SD	A	SA	N	A	A	SA	SD	A	A	SD	SD	SD	SD	A	A	D	SD	D	N	N	D	D	D	A
2024-05-31 06:05:30	26-35	Female	NCE/ND/TCII	SE	Imo	Ezinihitte Mbaise	Onicha 1	Yes	APC	1-5 yrs	No			Yes	Ward Executive	No		No		SA	SA	D	A	SA	D	A	A	SA	SD	A	A	SD	SD	SD	SD	A	A	SD	SD	N	N	N	D	D	SD	A
2024-05-31 06:16:58	36-45	Male	HND/BSC/(FIRST DEGREE)	SE	Imo	Ideato South	Dikenafai	Yes	APC	1-5 yrs	Yes	PDP	Factionalization, Hijack of Party Structure	Yes	LG Executive	No		No		SA	A	D	A	SA	N	A	A	SA	D	A	A	SD	D	D	D	A	D	D	SD	N	N	N	D	D	D	A
2024-05-31 06:23:15	36-45	Male	HND/BSC/(FIRST DEGREE)	SE	Imo	Ihitte/Uboma	Okata	Yes	APC	6-10 yrs	No			Yes	State Executive	No		Yes	Boards	SA	SA	D	A	SA	N	A	SA	SA	D	A	A	N	N	D	N	A	A	D	SD	N	A	A	D	N	D	A	How does the level of decentralization of party structures enhance their ideologies in Nigeria ?
2024-05-31 06:30:10	26-35	Female	NCE/ND/TCII	SE	Imo	Ngor Okpala	Eziama/Okpala	Yes	APC	1-5 yrs	No			No		No		Yes	Boards	SA	A	D	A	SA	D	A	A	SA	D	A	A	SD	SD	SD	SD	A	A	D	SD	SD	N	N	D	D	D	A
2024-05-31 06:36:45	46-55	Female	HND/BSC/(FIRST DEGREE)	SE	Imo	Obowo	Umunachi	Yes	APC	6-10 yrs	No			No		No		No		SA	A	D	A	SA	D	A	A	SA	D	A	A	D	SD	SD	SD	A	A	D	SD	N	N	N	D	D	D	A
2024-06-03 01:57:24	36-45	Female	HND/BSC/(FIRST DEGREE)	SW	Lagos	Surulere	Aguda	Yes	APC	6-10 yrs	No			Yes	State Executive	No		Yes	Boards	SA	A	N	A	SA	A	A	A	SA	N	A	N	N	N	D	D	A	A	D	D	N	A	A	N	N	N	A
2024-06-03 02:05:29	46-55	Male	HND/BSC/(FIRST DEGREE)	SW	Lagos	Amuwo Odofin	Ibeshe	Yes	APC	6-10 yrs	No			No		No		Yes	Cabinet/Exco	SA	SA	N	A	A	A	A	A	A	N	A	A	N	D	D	D	N	A	D	N	N	A	A	N	N	N	A
2024-06-03 02:20:14	36-45	Female	HND/BSC/(FIRST DEGREE)	SW	Lagos	Eti-Osa	Obalende	Yes	APC	6-10 yrs	No			No		No		No		SA	SA	N	A	A	N	A	SA	A	N	N	N	D	D	D	N	A	A	D	D	N	A	N	N	N	N	A
2024-06-03 02:59:23	36-45	Female	HND/BSC/(FIRST DEGREE)	SW	Lagos	Ikeja	Onigbongbon	Yes	APC	6-10 yrs	No			Yes	State Executive	No		Yes	Cabinet/Exco	SA	SA	N	A	A	A	A	A	A	D	A	A	N	D	D	D	A	A	D	N	N	A	A	N	N	N	A
2024-06-03 03:09:57	56-65	Male	HND/BSC/(FIRST DEGREE)	SW	Lagos	Somolu	Onipanu	Yes	APC	6-10 yrs	No			Yes	State Executive	No		Yes	Cabinet/Exco	SA	SA	N	A	A	A	A	SA	A	D	A	A	N	N	N	N	A	A	D	D	N	A	A	N	N	N	A
2024-06-03 03:39:57	66 and above	Male	HND/BSC/(FIRST DEGREE)	SW	Lagos	Oshodi/Isolo	Okota	Yes	APC	6-10 yrs	Yes	PDP	Factionalization	Yes	State Executive	Yes	Ward Councilor	Yes	Boards	SA	SA	N	A	A	A	A	SA	A	D	A	A	N	D	D	D	A	A	N	D	N	A	A	N	N	N	A
2024-06-03 07:22:21	26-35	Female	HND/BSC/(FIRST DEGREE)	SW	Lagos	Agege	Orile Agege/Oko Oba	Yes	APC	1-5 yrs	No			Yes	LG Executive	No		No		SA	A	D	A	A	N	A	A	A	D	A	A	D	D	D	D	A	A	D	D	N	N	N	D	D	D	A
2024-06-06 11:12:47	36-45	Female	HND/BSC/(FIRST DEGREE)	SW	Lagos	Kosofe	Anthony/Ajao Estate/Mende/Maryland	Yes	APC	6-10 yrs	No			No		No		Yes	Adviser/Assistant	SA	SA	N	A	SA	N	A	A	SA	A	N	A	N	D	D	SD	D	A	A	D	D	N	A	A	N	N	A
2024-06-06 11:18:57	26-35	Male	HND/BSC/(FIRST DEGREE)	SW	Lagos	Ojo	Okokomaiko	Yes	APC	1-5 yrs	No			No		No		No		SA	A	N	A	SA	N	N	A	SA	A	D	A	A	N	D	D	D	A	A	D	D	N	D	D	N	N	A
2024-06-06 11:31:39	46-55	Male	NCE/ND/TCII	SW	Lagos	Somolu	Igbobi/Fadeyi	Yes	APC	6-10 yrs	No			No		Yes	Ward Councilor	Yes	Boards	SA	A	D	A	SA	N	A	A	SA	SA	N	A	N	N	D	N	N	A	A	D	D	N	N	N	D	D	A
2024-06-06 11:36:29	26-35	Female	HND/BSC/(FIRST DEGREE)	SW	Lagos	Ajeromi/Ifelodun	Olodi	Yes	APC	1-5 yrs	No			Yes	Ward Executive	No		No		SA	SA	N	A	A	N	N	A	SA	SA	SD	A	A	D	D	SD	D	A	A	D	D	N	N	N	D	D	A
2024-06-06 11:43:00	36-45	Female	NCE/ND/TCII	SW	Lagos	Alimosho	Ikotun/Ijegun	Yes	APC	6-10 yrs	No			Yes	LG Executive	No		Yes	Boards	SA	SA	N	A	SA	N	N	A	A	A	D	A	A	N	D	D	D	A	A	D	D	N	A	A	D	N	A
2024-06-06 11:51:30	46-55	Male	HND/BSC/(FIRST DEGREE)	SW	Lagos	Ibeku Lekki	Ibeju 11	Yes	APC	6-10 yrs	No			Yes	State Executive	No		Yes	Boards	SA	SA	N	A	SA	N	A	A	SA	SA	N	A	A	N	D	D	D	A	A	D	D	N	A	A	N	D	A
2024-06-06 11:59:55	26-35	Female	NCE/ND/TCII	SW	Lagos	Epe	Ilara	Yes	APC	1-5 yrs	No			Yes	Ward Executive	No		No		SA	A	N	A	SA	N	N	A	SA	A	D	A	A	N	D	D	N	A	A	D	D	N	N	N	N	N	N
2024-06-06 12:07:59	26-35	Male	HND/BSC/(FIRST DEGREE)	SW	Lagos	Badagary	Ajara	Yes	APC	6-10 yrs	No			Yes	LG Executive	No		Yes	Adviser/Assistant	SA	SA	N	A	SA	N	N	A	SA	A	SD	A	A	N	D	SD	D	A	A	SD	D	N	N	N	D	D	A
2024-06-06 12:16:00	56-65	Male	HND/BSC/(FIRST DEGREE)	SW	Lagos	Apapa	Apapa 1V	Yes	APC	6-10 yrs	No			No		No		Yes	Boards	SA	SA	N	A	SA	N	A	A	SA	A	SD	A	A	N	D	SD	D	A	A	D	D	N	A	A	N	N	A
2024-06-06 12:21:34	36-45	Female	NCE/ND/TCII	SW	Lagos	Ifako-Ijaye	Iju Isaga	Yes	APC	6-10 yrs	No			Yes	LG Executive	No		No		SA	A	D	A	SA	D	N	A	SA	SA	SD	A	A	D	D	SD	D	A	A	D	D	N	A	A	N	N	A	How does decentralized organizational structure impact on the membership stability of your Party?a
2024-06-06 12:28:20	26-35	Female	HND/BSC/(FIRST DEGREE)	SW	Lagos	Mushin	Itire	Yes	APC	1-5 yrs	No			No		No		No		SA	SA	N	A	A	N	N	A	SA	A	D	A	A	N	D	SD	D	A	A	SD	SD	N	N	N	N	N	A
2024-06-06 12:50:41	46-55	Male	HND/BSC/(FIRST DEGREE)	SW	Lagos	Lagos Mainland	Yaba/Igbobi	Yes	APC	6-10 yrs	No			No		No		Yes	Cabinet/Exco	SA	SA	D	A	A	D	A	A	SA	A	SD	A	A	N	D	SD	D	A	A	D	SD	N	A	A	N	N	SA
2024-06-06 12:58:29	18-25	Male	HND/BSC/(FIRST DEGREE)	SW	Lagos	Lagos Island	Onikan	Yes	APC	1-5 yrs	No			Yes	Ward Executive	No		No		SA	A	N	A	SA	N	N	A	A	SA	SD	A	A	N	D	D	D	N	A	SD	SD	D	N	N	D	D	SA
2024-06-06 13:14:07	36-45	Female	HND/BSC/(FIRST DEGREE)	SW	Lagos	Ikorodu	Iselle 111	Yes	APC	6-10 yrs	No			Yes	Ward Executive	No		Yes	Boards	SA	SA	SD	SA	SA	SD	D	A	A	SA	SD	A	A	SD	SD	SD	SD	SA	A	SD	SD	D	N	N	D	N	A
2024-06-06 13:19:42	18-25	Female	WAEC/NECO	SW	Lagos	Agege	Oyewole/Papa Ashafa	Yes	APC	1-5 yrs	No			No		No		No		SA	SA	N	A	SA	N	D	A	A	A	SD	A	A	N	D	D	D	A	A	SD	D	N	N	N	N	N	A
2024-06-06 13:25:08	46-55	Female	NCE/ND/TCII	SW	Lagos	Ibeju Lekki	Lekki 11	Yes	APC	6-10 yrs	Yes	PDP	Imposition of Candidates, Hijack of Party Structure	No		No		No		SA	A	D	A	SA	D	N	A	SA	SA	SD	A	A	D	D	D	D	A	A	SD	SD	D	A	A	D	D	A
2024-06-06 13:30:38	46-55	Male	HND/BSC/(FIRST DEGREE)	SW	Lagos	Alimosho	Ipaja North	Yes	APC	6-10 yrs	No			No		No		Yes	Adviser/Assistant	SA	SA	N	A	SA	N	A	A	SA	SA	D	A	A	N	N	N	N	A	A	D	SD	D	A	A	D	D	A
2024-06-10 13:17:14	26-35	Female	WAEC/NECO	NW	Kaduna	Kaduna North	Shaba	Yes	APC	6-10 yrs	Yes	PDP	Imposition of Candidates, Hijack of Party Structure	No		No		No		SA	A	D	A	A	D	N	A	SA	A	D	A	A	D	D	SD	D	A	A	D	D	N	N	N	D	D	A
2024-06-10 13:23:07	18-25	Male	WAEC/NECO	NW	Kaduna	Jema'a	Kafanchan B	Yes	APC	1-5 yrs	No			No		No		No		SA	A	D	A	SA	N	N	A	A	SA	D	A	A	N	D	SD	D	A	A	D	D	N	N	N	D	D	A
2024-06-10 13:34:56	36-45	Female	HND/BSC/(FIRST DEGREE)	NW	Kaduna	Ikara	Rumi	Yes	APC	6-10 yrs	No			No		No		Yes	Boards	SA	SA	N	A	SA	N	A	A	SA	SA	D	N	N	N	D	N	D	A	A	D	D	N	A	A	D	D	A
2024-06-10 13:38:31	46-55	Male	HND/BSC/(FIRST DEGREE)	NW	Kaduna	Kaduna South	Barnawa	Yes	APC	6-10 yrs	No			Yes	State Executive	No		Yes	Cabinet/Exco	SA	SA	N	A	SA	N	A	A	SA	SA	SD	A	A	N	D	SD	D	A	A	SD	D	D	A	A	D	D	A
2024-06-10 14:18:46	66 and above	Male	HND/BSC/(FIRST DEGREE)	NW	Kaduna	Kajuru	Kallah	Yes	APC	6-10 yrs	Yes	ANPP		No		No		Yes	Cabinet/Exco	SA	SA	N	A	SA	N	A	A	SA	SA	D	A	A	N	D	SD	D	N	A	D	D	N	A	A	N	N	A
2024-06-10 14:45:32	56-65	Male	POSTGRADUATE	NW	Kaduna	Kagarko	Kushe	Yes	APC	6-10 yrs	Yes	ANPP		Yes	Zonal Executive	No		Yes	Cabinet/Exco	SA	SA	A	A	SA	A	A	A	SA	A	N	N	N	A	A	N	A	N	A	D	D	D	A	A	N	N	A
2024-06-10 14:51:44	46-55	Male	HND/BSC/(FIRST DEGREE)	NW	Kaduna	Kachia	Kachia Urban	Yes	APC	6-10 yrs	No			Yes	National Executive	No		Yes	Cabinet/Exco	SA	SA	A	A	A	A	SA	A	SA	A	N	N	D	A	A	A	A	D	A	N	D	D	SA	SA	N	N	A
2024-06-10 14:56:23	26-35	Female	NCE/ND/TCII	NW	Kaduna	Jaba	Daddu	Yes	APC	1-5 yrs	No			Yes	LG Executive	No		No		SA	SA	D	A	SA	D	N	A	SA	SA	SD	A	A	D	D	SD	D	A	A	D	D	N	N	N	D	D	A
2024-06-10 22:35:37	26-35	Female	WAEC/NECO	NW	Kaduna	Giwa	Kakagi	Yes	APC	1-5 yrs	No			Yes	Ward Executive	No		No		SA	SA	SD	A	SA	SD	D	A	SA	SA	SD	A	N	N	D	SD	D	A	A	D	SD	N	N	N	N	N	A
2024-06-10 22:46:46	36-45	Male	HND/BSC/(FIRST DEGREE)	NW	Kaduna	Igabi	Gwaraji	Yes	APC	6-10 yrs	No			No		No		Yes	Adviser/Assistant	SA	SA	N	A	SA	N	A	A	SA	SA	D	A	A	D	D	SD	D	A	A	D	D	D	N	N	D	D	A
2024-06-10 23:00:26	46-55	Female	HND/BSC/(FIRST DEGREE)	NW	Kaduna	Kaura	Mallagum	Yes	APC	6-10 yrs	Yes	PDP	Imposition of Candidates, Hijack of Party Structure	Yes	State Executive	No		Yes	Boards	SA	SA	N	A	SA	N	A	A	SA	SA	SD	A	A	N	D	SD	D	A	A	D	D	D	A	A	D	D	A
2024-06-10 23:17:53	66 and above	Male	POSTGRADUATE	NW	Kaduna	Makarfi	Makarfi	Yes	APC	6-10 yrs	Yes	ANPP	Imposition of Candidates, Hijack of Party Structure	No		Yes	MHR	Yes	Cabinet/Exco	SA	SA	A	A	SA	N	A	A	SA	SA	N	A	N	N	N	N	A	D	A	N	D	D	A	A	D	D	A
2024-06-10 23:21:20	26-35	Female	WAEC/NECO	NW	Kaduna	Lere	Lere	Yes	APC	1-5 yrs	No			Yes	Ward Executive	No		No		SA	SA	SD	SA	SA	SD	D	A	SA	SA	SD	A	A	SD	D	SD	D	SA	A	SD	SD	D	N	N	D	D	A
2024-06-11 19:47:35	66 and above	Male	POSTGRADUATE	NC	Nasarawa	Keffi	Angwan Iya 1	Yes	APC	6-10 yrs	Yes	PDP	Factionalization, Hijack of Party Structure	Yes	National Executive	Yes	Senator	Yes	Cabinet/Exco	SA	SA	A	A	SA	A	SA	SA	SA	SA	N	A	N	A	A	A	A	D	N	N	SD	D	SA	SA	N	N	A
2024-06-11 21:45:56	26-35	Female	WAEC/NECO	NW	Kaduna	Kudan	Zabi	Yes	APC	1-5 yrs	No			No		No		No		SA	SA	D	A	SA	D	N	A	SA	SA	D	A	A	D	D	SD	D	A	A	D	D	N	N	N	N	N	A
2024-06-11 22:21:07	36-45	Female	HND/BSC/(FIRST DEGREE)	NW	Kaduna	Sabon Gari	Zabi	Yes	APC	6-10 yrs	No			Yes	LG Executive	No		No		SA	SA	D	A	A	D	N	A	SA	SA	SD	A	A	D	D	SD	D	A	A	D	D	N	N	N	N	N	A
2024-06-11 22:25:54	18-25	Male	WAEC/NECO	NW	Kaduna	Sabon Gari	Jama'a	Yes	APC	1-5 yrs	No			No		No		No		SA	SA	SD	A	A	SD	D	A	A	A	SD	N	N	SD	D	SD	D	A	A	D	SD	N	N	N	D	N	SA
2024-06-11 22:38:03	46-55	Male	NCE/ND/TCII	NW	Kaduna	Sanga	Gwatu	Yes	APC	6-10 yrs	No			Yes	State Executive	No		No		SA	SA	N	A	SA	N	A	A	SA	SA	D	A	A	D	D	D	D	A	A	SD	SD	D	A	A	D	D	A
2024-06-11 22:46:02	66 and above	Male	WAEC/NECO	NW	Kaduna	Zangon Kataf	Gidan Jatau	Yes	APC	6-10 yrs	Yes	ANPP	Factionalization, Non Inclusion in Decision-making, Hijack of Party Structure	Yes	LG Executive	No		Yes	Boards	SA	A	D	A	SA	N	N	A	SA	SA	SD	A	A	D	D	SD	D	SA	A	SD	SD	D	N	N	D	N	A
2024-06-12 15:08:45	36-45	Female	HND/BSC/(FIRST DEGREE)	NW	Kaduna	Kacha	Gumel	Yes	APC	6-10 yrs	No			Yes	State Executive	No		Yes	Boards	SA	SA	D	A	SA	N	A	A	SA	A	SD	A	A	D	D	SD	D	A	A	D	D	D	A	A	D	D	A
2024-06-12 16:10:01	26-35	Male	WAEC/NECO	NW	Kaduna	Songa	Gwatu	Yes	APC	1-5 yrs	No			Yes	Ward Executive	No		No		SA	SA	SD	A	A	SD	D	A	SA	SA	SD	A	A	D	D	D	D	A	A	D	D	N	N	N	N	D	A
2024-06-12 16:29:23	36-45	Female	HND/BSC/(FIRST DEGREE)	NW	Kaduna	Soba	Soba	Yes	APC	1-5 yrs	Yes	PDP	Imposition of Candidates, Hijack of Party Structure	No		No		No		SA	SA	D	A	SA	D	N	A	A	SA	D	A	A	SD	D	D	D	A	A	D	SD	D	N	N	D	D	A
2024-06-12 16:34:41	26-35	Female	WAEC/NECO	NW	Kaduna	Zaria	Tudun Wada	Yes	APC	6-10 yrs	No			No		Yes	Ward Councilor	Yes	Adviser/Assistant	SA	SA	D	A	SA	D	N	A	A	SA	SD	A	A	D	D	SD	D	A	A	SD	D	N	N	N	D	D	A
2024-06-12 16:40:52	56-65	Male	HND/BSC/(FIRST DEGREE)	NW	Kaduna	Zaria	Kaura	Yes	APC	6-10 yrs	No			No		No		Yes	Adviser/Assistant	SA	SA	SD	A	SA	D	A	A	SA	SA	D	A	SA	D	D	SD	D	A	A	SD	D	D	A	A	D	D	A
2024-06-12 16:46:35	26-35	Female	WAEC/NECO	NW	Kaduna	Sanga	Bokana	Yes	APC	1-5 yrs	No			Yes	LG Executive	No		No		SA	SA	D	SA	SA	N	N	A	SA	SA	SD	A	A	SD	D	SD	D	A	A	SD	D	D	N	N	D	D	A
2024-06-12 16:51:19	26-35	Male	WAEC/NECO	NW	Kaduna	Kauru	Makami	Yes	APC	1-5 yrs	No			Yes	Ward Executive	No		No		SA	A	SD	A	SA	SD	N	A	SA	SA	SD	A	A	SD	D	SD	D	A	A	SD	D	N	N	N	D	D	A
2024-06-22 19:42:21	56-65	Male	POSTGRADUATE	SS	Delta	Ughelli North	Ughelli	Yes	APC	6-10 yrs	Yes	PDP	Non Inclusion in Decision-making, Imposition of Candidates	No		Yes	Senator	No		SA	SA	N	A	SA	N	SA	A	SA	SA	D	A	A	A	N	N	N	D	A	D	D	N	SA	SA	N	N	A
2024-06-22 19:54:22	56-65	Male	POSTGRADUATE	SS	Delta	Sapele	Sapele Urban	Yes	APC	1-5 yrs	Yes	PDP	Non Inclusion in Decision-making, Imposition of Candidates	No		Yes	Senator	Yes	Adviser/Assistant	SA	SA	N	A	A	N	SA	A	SA	A	D	A	A	N	D	D	N	D	A	D	D	N	SA	SA	N	N	A
2024-06-22 20:18:25	46-55	Male	HND/BSC/(FIRST DEGREE)	NC	Nasarawa	Nasarawa Eggon	Igga/Burumburum	Yes	APC	6-10 yrs	Yes	PDP	Non Inclusion in Decision-making, Imposition of Candidates	No		Yes	Senator	No		SA	SA	N	A	A	D	SA	A	SA	SA	D	A	A	D	N	D	D	N	A	D	D	N	A	N	N	D	A
2024-06-23 09:24:25	46-55	Male	HND/BSC/(FIRST DEGREE)	NE	Adamawa	Mubi South		Yes	APC	6-10 yrs	No			No		Yes	Senator	No		SA	SA	D	A	SA	N	SA	A	SA	SA	D	A	A	N	D	D	D	D	A	D	D	N	SA	A	N	D	A
2024-06-23 10:05:30	46-55	Female	POSTGRADUATE	NE	Adamawa	Yola South	Ngurore	Yes	APC	6-10 yrs	Yes	PDP	Imposition of Candidates, Hijack of Party Structure	No		Yes	Senator	No		SA	SA	N	A	SA	N	SA	A	SA	SA	SD	A	A	N	D	D	D	D	A	D	D	N	A	A	D	N	A
2024-06-23 10:44:37	56-65	Male	HND/BSC/(FIRST DEGREE)	SE	Imo	Ideato South	Ogboko	Yes	APC	11-15 yrs	Yes	PDP	Non Inclusion in Decision-making, Imposition of Candidates	No		Yes	Senator	Yes	Boards	SA	SA	N	A	SA	N	SA	A	SA	SA	D	A	A	N	N	SD	N	D	A	D	SD	N	A	A	N	N	A
2024-06-23 11:08:50	66 and above	Male	HND/BSC/(FIRST DEGREE)	SE	Imo	Oru East	Omuma	Yes	APC	6-10 yrs	Yes	PDP	Non Inclusion in Decision-making, Imposition of Candidates	Yes	National Executive	Yes	Senator	No		SA	SA	N	A	SA	N	SA	A	SA	SA	A	N	N	A	N	N	N	D	N	N	SD	N	SA	SA	N	N	A
2024-06-23 14:37:47	46-55	Male	POSTGRADUATE	NW	Kaduna	Zaria		Yes	APC	6-10 yrs	Yes	PDP	Non Inclusion in Decision-making, Imposition of Candidates	No		Yes	Senator	Yes	Cabinet/Exco	SA	SA	N	A	A	N	SA	A	SA	SA	D	A	A	N	N	D	N	D	A	D	SD	N	SA	SA	N	N	A
2024-06-23 15:01:08	56-65	Male	POSTGRADUATE	NW	Kaduna	Sabon Gari	Dogorawa	Yes	APC	11-15 yrs	No					Yes	Senator	Yes	Cabinet/Exco	SA	SA	N	A	SA	N	SA	A	SA	SA	SD	A	A	N	D	SD	D	D	A	D	SD	N	SA	A	N	N	A
2024-06-23 15:06:25	46-55	Female	POSTGRADUATE	SW	Lagos	Ojo	Ojo	Yes	APC	6-10 yrs	No			No		Yes	Senator	Yes	Boards	SA	SA	A	A	SA	N	SA	A	SA	SA	D	A	A	N	N	D	N	D	A	D	SD	N	A	A	N	N	A
2024-06-23 15:12:38	56-65	Male	POSTGRADUATE	SW	Lagos	Lagos Island	Oluwole	Yes	APC	6-10 yrs	No			No		Yes	Senator	Yes	Cabinet/Exco	SA	SA	N	A	A	N	A	A	SA	SA	D	A	A	N	N	D	N	D	A	D	SD	N	SA	SA	N	N	A
2024-06-24 12:50:30	56-65	Male	HND/BSC/(FIRST DEGREE)	SS	Delta	Udu	Aladja	Yes	APC	6-10 yrs	No			No		Yes	MHR	No		SA	SA	N	A	A	N	SA	A	SA	SA	D	A	A	D	D	SD	D	D	A	SD	D	D	A	A	N	D	A
2024-06-24 12:54:34	36-45	Male	HND/BSC/(FIRST DEGREE)	SS	Delta	Uvwie	Effurun 1	Yes	APC	6-10 yrs	No			No		Yes	State Assembly	No		SA	SA	D	A	A	D	A	A	SA	SA	SD	A	A	D	D	SD	D	N	A	SD	A	D	A	A	D	D	A
2024-06-24 12:58:57	36-45	Male	HND/BSC/(FIRST DEGREE)	SS	Delta	Udu	Udu 11	Yes	APC	6-10 yrs	No			No		Yes	State Assembly	No		SA	A	D	A	A	D	A	A	SA	SA	SD	A	A	D	D	SD	D	D	A	SD	D	N	A	A	D	D	A
2024-06-24 13:10:54	66 and above	Male	HND/BSC/(FIRST DEGREE)	NE	Adamawa	Hong	Hong	Yes	APC	6-10 yrs	Yes	PDP	Non Inclusion in Decision-making, Imposition of Candidates	Yes	State Executive	Yes	MHR	No	Cabinet/Exco	SA	SA	D	A	SA	D	SA	A	SA	SA	SD	A	A	D	D	SD	D	D	A	SD	D	N	A	A	N	N	A
2024-06-24 13:17:09	46-55	Male	HND/BSC/(FIRST DEGREE)	NE	Adamawa	Fuforel	Fufore	Yes	APC	6-10 yrs	Yes	PDP	Imposition of Candidates	Yes	LG Executive	Yes	MHR	Yes	Adviser/Assistant	SA	SA	N	A	A	N	SA	A	SA	SA	D	A	A	D	D	D	D	D	A	SD	D	D	A	A	D	D	A
2024-06-24 13:46:43	46-55	Male	HND/BSC/(FIRST DEGREE)	SE	Imo	Ngor Okpala	Nguru Umuowa	Yes	APC	1-5 yrs	Yes	PDP	Imposition of Candidates	No		Yes	MHR	No		SA	SA	D	A	A	N	A	A	SA	SA	SD	A	A	D	D	SD	D	N	A	SD	D	D	A	A	D	D	A
2024-06-24 13:50:46	56-65	Male	WAEC/NECO	SE	Imo	Orlu	Ihitenasa	Yes	APC	6-10 yrs	No			No		Yes	MHR	No		SA	A	N	A	SA	D	A	A	SA	SA	SD	A	A	D	D	SD	D	N	A	SD	D	D	A	A	D	D	A
2024-06-25 13:33:13	36-45	Male	POSTGRADUATE	NW	Kaduna	Kaduna North	Badarawa	Yes	APC	6-10 yrs	No			No		Yes	MHR	Yes	Adviser/Assistant	SA	SA	D	A	SA	N	SA	A	SA	SA	SD	A	A	N	D	SD	D	N	A	SD	D	N	A	A	D	D	A
2024-06-25 13:54:16	56-65	Male	POSTGRADUATE	NW	Kaduna	Zaria	Kwarbai	Yes	APC	11-15 yrs	No			No		Yes	MHR	No		SA	SA	N	A	SA	D	SA	A	SA	SA	SD	A	A	D	D	SD	D	D	A	SD	D	N	A	A	D	D	SA
2024-06-26 10:50:48	56-65	Male	POSTGRADUATE	SW	Lagos	Surulere	Ikate	Yes	APC	11-15 yrs	No			No		Yes	MHR	Yes	Cabinet/Exco	SA	SA	N	A	SA	N	SA	A	SA	SA	D	A	A	D	D	D	D	D	A	SD	D	N	A	A	N	N	A
2024-06-26 10:55:50	66 and above	Male	POSTGRADUATE	SW	Lagos	Oshodi-Isolo	Isolo	Yes	APC	11-15 yrs	No			No		Yes	MHR	Yes	Cabinet/Exco	SA	SA	D	A	SA	N	SA	A	SA	SA	SD	A	A	N	D	SD	D	D	A	D	A	N	A	A	N	N	A
2024-06-26 12:50:36	36-45	Male	POSTGRADUATE	NC	Nasarawa	Wamba	Wamba	Yes	APC	1-5 yrs	No			No		Yes	MHR	No		SA	SA	D	A	SA	D	SA	A	SA	SA	SD	A	A	D	D	SD	D	N	A	SD	D	N	A	A	N	D	A
2024-06-26 13:00:21	46-55	Male	POSTGRADUATE	NC	Nasarawa	Awe	Madaki	Yes	APC	6-10 yrs	No			No		Yes	MHR	No		SA	SA	D	A	SA	N	SA	A	SA	SA	SD	A	A	N	D	SD	D	D	A	SD	D	N	A	A	N	D	N
2024-06-30 13:37:49	46-55	Male	HND/BSC/(FIRST DEGREE)	NW	Kaduna	Sabon Gari	Basawa	Yes	APC	6-10 yrs	No			No		Yes	State Assembly	No		SA	SA	D	A	A	D	SA	A	SA	SA	SD	A	A	D	D	SD	D	N	A	SD	D	N	A	A	D	D	A
2024-06-30 13:41:07	36-45	Male	HND/BSC/(FIRST DEGREE)	NW	Kaduna	Giwa	Idasu	Yes	APC	1-5 yrs	No			No		Yes	State Assembly	No		SA	SA	D	A	SA	D	A	A	SA	SA	SD	A	A	D	D	SD	D	A	A	SD	D	D	A	A	D	D	A
2024-06-30 13:44:33	36-45	Male	HND/BSC/(FIRST DEGREE)	NW	Kaduna	Ikara	Paki	Yes	APC	6-10 yrs	No			Yes	State Executive	Yes	State Assembly	Yes	Adviser/Assistant	SA	SA	D	A	SA	N	SA	A	SA	SA	SD	A	A	D	D	SD	D	D	A	SD	D	D	A	A	D	D	A
2024-06-30 19:14:23	46-55	Male	HND/BSC/(FIRST DEGREE)	NC	Nasarawa	Kokona	Garuku	Yes	APC	11-15 yrs	No			No		Yes	State Assembly	No		SA	SA	D	A	SA	D	SA	A	SA	SA	SD	A	A	D	D	SD	D	D	A	SD	D	D	SA	SA	D	D	A
2024-06-30 19:17:04	46-55	Male	HND/BSC/(FIRST DEGREE)	NC	Nasarawa	Awe	Galadima	Yes	APC	6-10 yrs	No			No		Yes	State Assembly	No		SA	SA	D	A	SA	D	SA	A	SA	SA	SD	A	A	D	D	SD	D	D	A	SD	D	D	SA	SA	D	D	A
2024-06-30 19:20:38	36-45	Male	HND/BSC/(FIRST DEGREE)	NC	Nasarawa	Keffi	Liman Abaji	Yes	APC	6-10 yrs	No			No		Yes	State Assembly	No		SA	SA	D	A	SA	N	SA	A	SA	SA	SD	A	A	SD	D	SD	D	N	A	SD	D	D	SA	SA	D	D	A
2024-06-30 19:31:40	26-35	Male	HND/BSC/(FIRST DEGREE)	NE	Adamawa	Fufore	Gurin	Yes	APC	6-10 yrs	No			Yes	State Executive	Yes	State Assembly	No		SA	SA	SD	A	A	N	SA	A	SA	SA	SD	N	A	SD	D	SD	D	A	A	SD	D	D	A	A	D	D	A
2024-06-30 19:35:11	46-55	Male	HND/BSC/(FIRST DEGREE)	NE	Adamawa	Ganye	Sugu	Yes	APC	6-10 yrs	No			Yes	LG Executive	Yes	State Assembly	No		SA	SA	N	A	A	N	SA	A	SA	SA	SD	N	N	N	D	D	D	N	A	SD	D	D	SA	SA	D	D	A
2024-06-30 22:16:06	56-65	Male	HND/BSC/(FIRST DEGREE)	NE	Adamawa	Yola North	Rumde	Yes	APC	6-10 yrs	No			Yes	National Executive	Yes	MHR	Yes	Cabinet/Exco	SA	SA	N	A	SA	A	SA	A	SA	SA	N	N	N	A	A	A	A	D	A	N	D	D	SA	SA	D	D	A
2024-06-30 22:20:39	46-55	Male	POSTGRADUATE	SE	Imo	Ideato North	Izuogu	Yes	APC	11-15 yrs	No			Yes	National Executive	No		Yes	Adviser/Assistant	SA	SA	A	A	SA	N	SA	A	SA	SA	N	N	N	A	A	A	A	N	A	N	D	D	SA	SA	D	D	A
2024-06-30 22:25:35	36-45	Male	POSTGRADUATE	SW	Lagos	Lagos Island	Eiyekole	Yes	APC	6-10 yrs	No			Yes	National Executive	No		No		SA	SA	D	A	SA	N	SA	A	SA	SA	D	A	A	D	N	N	D	N	A	N	D	D	SA	SA	D	N	A
2024-06-30 22:32:21	46-55	Male	HND/BSC/(FIRST DEGREE)	SE	Imo	Orlu	Umudioka	Yes	APC	6-10 yrs	No			Yes	Zonal Executive	No		No		SA	A	D	A	SA	N	SA	A	SA	SA	SD	A	A	D	D	SD	D	A	A	SD	D	D	SA	SA	D	N	A
2024-07-01 13:27:54	56-65	Male	POSTGRADUATE	SS	Delta	Ika South	Agbor1	Yes	APC	6-10 yrs	No			Yes	National Executive	No		Yes	Adviser/Assistant	SA	SA	D	A	SA	A	SA	A	SA	SA	N	A	A	A	A	N	A	A	A	N	D	D	SA	SA	D	D	A
2024-07-01 13:40:14	36-45	Male	HND/BSC/(FIRST DEGREE)	SS	Delta	Patani	Patani 111	Yes	APC	1-5 yrs	No			Yes	Zonal Executive	No		No		SA	SA	D	A	SA	N	A	A	SA	SA	SD	A	A	D	D	D	D	A	A	SD	D	D	A	A	D	D	A
2024-07-01 14:21:18	46-55	Male	HND/BSC/(FIRST DEGREE)	SW	Lagos	Agege	Orile Agege/Oko Oba	Yes	APC	11-15 yrs	No			Yes	Ward Executive	Yes	State Assembly	No		SA	SA	A	A	SA	A	SA	A	SA	SA	N	A	A	A	A	N	A	D	A	N	D	D	SA	SA	D	N	A
2024-07-01 14:26:16	36-45	Male	HND/BSC/(FIRST DEGREE)	SW	Lagos	Agege	Isale Odo	Yes	APC	6-10 yrs	No			No		Yes	State Assembly	No		SA	SA	D	A	SA	D	SA	A	SA	SA	SD	A	A	D	D	SD	D	D	A	SD	D	D	SA	SA	D	N	A
2024-07-01 14:32:38	56-65	Male	HND/BSC/(FIRST DEGREE)	SW	Lagos	Ajeromi - Ifelodun	Olodi	Yes	APC	6-10 yrs	No			No		Yes	State Assembly	No		SA	SA	D	A	SA	N	SA	A	SA	SA	SD	A	A	D	D	SD	D	D	A	SD	D	D	SA	SA	D	D	A
2024-07-07 17:36:48	36-45	Female	HND/BSC/(FIRST DEGREE)	SE	Imo	Isu	Isu Njaba 2	Yes	APC	6-10 yrs	No			No		Yes	State Assembly	No		SA	SA	D	A	SA	N	SA	A	SA	SA	SD	A	A	D	D	SD	D	N	A	SD	D	D	A	A	D	D	A
2024-07-08 16:30:53	36-45	Male	HND/BSC/(FIRST DEGREE)	SE	Imo	Njaba	Umuaka 11	Yes	APC	6-10 yrs	No			No		Yes	State Assembly	No		SA	SA	D	A	SA	D	A	A	SA	SA	SD	A	A	D	D	SD	D	N	A	SD	D	D	A	A	D	D	A
2024-07-08 16:50:52	36-45	Male	HND/BSC/(FIRST DEGREE)	SE	Imo	Ideato North	Osina	Yes	APC	6-10 yrs	No			No		Yes	State Assembly	No		SA	SA	SD	N	SA	N	SA	A	SA	SA	SD	N	N	N	D	SD	D	SD	A	SD	SD	D	SA	A	D	D	A
																																															Are there significant differences in the relationships between decentralized party organization and inclusive local participation in decision making in your Party?
																																						How does the level of decentralization of party structures enhance their ideologies in Nigeria ?
[truncated: 3 more columns]

## Sheet: PDP RESPONSE
Timestamp	1.Select Your Age bracket	2.Gender	3.Educational Attainment	4.Geopolitical Zone	5.State of Origin	6.Local Government Origin	7.Electoral Ward	8.Are you a member of a political party?	9.What is your party affiliation?	10. For how long have you been a member the party?	11. Have you ever changed your party membership?	12. If your answer to question 11 above is yes, please state the political party you changed from	13.Why did you change/defect?	14.Are you holding any party position currently or held any party position before: :	15.What was/is your position in the party (Note: If answer to the previous question is NO please ignore)	16.Have you been elected into any public office/position?	17.What is the position? (Note: If answer to the previous question is NO please ignore)	18.As a party man, have you ever been appointed to a public position?	19.What is/was the position?	How does decentralized organizational structure impact on the membership stability of your Party? Where: Strongly Agree (SA), Agree (A), Neutral (N), Disagree (D) and Strongly Disagree (SD) [1. My party has structures at the national, zonal, state, local and ward levels]	How does decentralized organizational structure impact on the membership stability of your Party? Where: Strongly Agree (SA), Agree (A), Neutral (N), Disagree (D) and Strongly Disagree (SD) [2. In my party, power is distributed among national, state and local party Branches.]	How does decentralized organizational structure impact on the membership stability of your Party? Where: Strongly Agree (SA), Agree (A), Neutral (N), Disagree (D) and Strongly Disagree (SD) [3. The Chapters/Branches effectively perform responsibilities assigned to them by the party constitution]	How does decentralized organizational structure impact on the membership stability of your Party? Where: Strongly Agree (SA), Agree (A), Neutral (N), Disagree (D) and Strongly Disagree (SD) [4. Decentralized organizational structure could positively influence the recruitment and retention of members in a party]	How does decentralized organizational structure impact on the membership stability of your Party? Where: Strongly Agree (SA), Agree (A), Neutral (N), Disagree (D) and Strongly Disagree (SD) [ 5. Commitment of party members is enhanced when they participate in decision-making process of the party]	How does decentralized organizational structure impact on the membership stability of your Party? Where: Strongly Agree (SA), Agree (A), Neutral (N), Disagree (D) and Strongly Disagree (SD) [6. My party allows individual members opinion in reaching decisions]	How does decentralized organizational structure impact on the membership stability of your Party? Where: Strongly Agree (SA), Agree (A), Neutral (N), Disagree (D) and Strongly Disagree (SD) [7. I have always paid my monthly dues.]	How does decentralized organizational structure impact on the membership stability of your Party? Where: Strongly Agree (SA), Agree (A), Neutral (N), Disagree (D) and Strongly Disagree (SD) [8 . Party leaders sometimes pay dues for members]	How does decentralized organizational structure impact on the membership stability of your Party? Where: Strongly Agree (SA), Agree (A), Neutral (N), Disagree (D) and Strongly Disagree (SD) [9. Infact, party leaders finance the party activities and programmes]	How does decentralized organizational structure impact on the membership stability of your Party? Where: Strongly Agree (SA), Agree (A), Neutral (N), Disagree (D) and Strongly Disagree (SD) [10. Not taking part in decision making affects the sense of party ownership and commitment among members]	How does decentralized organizational structure impact on the membership stability of your Party? Where: Strongly Agree (SA), Agree (A), Neutral (N), Disagree (D) and Strongly Disagree (SD) [11. The centralized pattern of decision making in the party positively affects party membership stability]	How does decentralized organizational structure impact on the membership stability of your Party? Where: Strongly Agree (SA), Agree (A), Neutral (N), Disagree (D) and Strongly Disagree (SD) [12.Granting of more autonomy to local party chapters/branches could positively impact in their ability to retain members and foster loyalty]	Are there significant differences in the relationships between decentralized party organization and inclusive local participation in decision making in your Party? Where: Strongly Agree (SA), Agree (A), Neutral (N), Disagree (D) and Strongly Disagree (SD) [1. Strong national party leadership’s control hinders the level of local autonomy in decision-making processes of our party]	Are there significant differences in the relationships between decentralized party organization and inclusive local participation in decision making in your Party? Where: Strongly Agree (SA), Agree (A), Neutral (N), Disagree (D) and Strongly Disagree (SD) [2. All Chapters/Branches of our party have reliable sources of funding]	Are there significant differences in the relationships between decentralized party organization and inclusive local participation in decision making in your Party? Where: Strongly Agree (SA), Agree (A), Neutral (N), Disagree (D) and Strongly Disagree (SD) [3. The nature of power distribution amongst our party Chapters/Branches ensures the inclusion of diverse local viewpoints in decision-making]	Are there significant differences in the relationships between decentralized party organization and inclusive local participation in decision making in your Party? Where: Strongly Agree (SA), Agree (A), Neutral (N), Disagree (D) and Strongly Disagree (SD) [4. The pattern of decision made at the Chapters/Branches of our party influences national party decision]	Are there significant differences in the relationships between decentralized party organization and inclusive local participation in decision making in your Party? Where: Strongly Agree (SA), Agree (A), Neutral (N), Disagree (D) and Strongly Disagree (SD) [5. The current structure of my party encourages members from diverse background to participate in decision making process]	Are there significant differences in the relationships between decentralized party organization and inclusive local participation in decision making in your Party? Where: Strongly Agree (SA), Agree (A), Neutral (N), Disagree (D) and Strongly Disagree (SD) [6. The conduct of party primaries by national leadership of our party discourages accountability of elected representatives to their local bra…	Are there significant differences in the relationships between decentralized party organization and inclusive local participation in decision making in your Party? Where: Strongly Agree (SA), Agree (A), Neutral (N), Disagree (D) and Strongly Disagree (SD) [7. Consideration of diverse viewpoints from Chapters/Branches could enhance greater participation in decision-making in a party]	Are there significant differences in the relationships between decentralized party organization and inclusive local participation in decision making in your Party? Where: Strongly Agree (SA), Agree (A), Neutral (N), Disagree (D) and Strongly Disagree (SD) [8. Strong national party leadership’s control of Chapters/Branches enhances greater members participation in party affairs]	Are there significant differences in the relationships between decentralized party organization and inclusive local participation in decision making in your Party? Where: Strongly Agree (SA), Agree (A), Neutral (N), Disagree (D) and Strongly Disagree (SD) [9. My party (from Ward to zonal levels) organizes congresses and primaries at various levels, without interference from the national leadershi…	How does the level of decentralization of party structures enhance their ideologies in Nigeria ? Where: Strongly Agree (SA), Agree (A), Neutral (N), Disagree (D) and Strongly Disagree (SD) [1. My party has a training institute where its policies and programs are developed]	How does the level of decentralization of party structures enhance their ideologies in Nigeria ? Where: Strongly Agree (SA), Agree (A), Neutral (N), Disagree (D) and Strongly Disagree (SD) [2. I know my parties ideologies policies and programs]	How does the level of decentralization of party structures enhance their ideologies in Nigeria ? Where: Strongly Agree (SA), Agree (A), Neutral (N), Disagree (D) and Strongly Disagree (SD) [3. I believe in the ideologies and work to achieve the policies and programs of my party. ]	How does the level of decentralization of party structures enhance their ideologies in Nigeria ? Where: Strongly Agree (SA), Agree (A), Neutral (N), Disagree (D) and Strongly Disagree (SD) [4. National ,zonal and state leaders are trained at the institute]	How does the level of decentralization of party structures enhance their ideologies in Nigeria ? Where: Strongly Agree (SA), Agree (A), Neutral (N), Disagree (D) and Strongly Disagree (SD) [5. Party Chapter/Branches train and inculcate in members its policies and programs.]	How does the level of decentralization of party structures enhance their ideologies in Nigeria ? Where: Strongly Agree (SA), Agree (A), Neutral (N), Disagree (D) and Strongly Disagree (SD) [6. Effective distribution of power among party chapters and branches promotes understanding of party ideologies, policies and programs]
2024-04-28 20:23:52	56-65	Male	HND/BSC/(FIRST DEGREE)	SW	Lagos	Lagos Island	D2	Yes	PDP	16+ yrs	No	None		No		No		Yes	Boards	SA	SA	A	A	SA	A	SA	SA	A	A	SA	SA	A	A	A	A	SA	SA	SA	A	N	SA	SA	SA	SA				How does decentralized organizational structure impact on the membership stability of your Party?a
2024-04-30 05:06:14	36-45	Male	HND/BSC/(FIRST DEGREE)	NC	Nasarawa	Keana	MADAKI	Yes	PDP	16+ yrs	No			Yes	LG Executive	Yes	Ward Councilor	Yes	Adviser/Assistant	SA	SA	SA	A	SA	SD	A	A	SA	SD	SA	SD	SD	SD	D	D	D	SD	SD	D	SA	SA	SA	A	SA	SA	SA	Questions	SA	A
2024-04-30 13:25:47	36-45	Male	HND/BSC/(FIRST DEGREE)	NC	Nasarawa	Lafia	Lafia	Yes	PDP	16+ yrs	No	PDP		No		No		No		SA	SA	SA	SA	SA	SA	SA	SA	A	A	SA	SA	SA	SA	SA	SA	D	SA	SA	SA	SA	SA	SA	A	A	SA	SA	1. My party has structures at the national, zonal, state, local and ward levels]	191	3
2024-04-30 14:56:30	46-55	Female	POSTGRADUATE	NW	Kaduna	Kaduna South	Barnawa 1	Yes	PDP	16+ yrs	No			Yes	National Executive	No		No		SA	SA	A	A	SA	SA	SA	A	SA	A	A	SA	D	N	D	N	A	A	A	SA	A	A	A	N	N	N	SA	2. In my party, power is distributed among national, state and local party Branches.]	128	64
2024-04-30 17:34:34	56-65		POSTGRADUATE	NC	Plateau	Jos North	Naraguta A	Yes	PDP	16+ yrs	No			No				Yes	Adviser/Assistant	SA	SA	SA	A	SA	N	N	A	SA	A	A	SA	N	A	N	N	SA	A	N	SA	SA	A	A	A	N	A	A	3. The Chapters/Branches effectively perform responsibilities assigned to them by the party constitution]	33	20
2024-05-01 08:32:43	56-65	Male	HND/BSC/(FIRST DEGREE)	SS	Delta	Patani	one	Yes	PDP	6-10 yrs		APC	Factionalization	Yes	Ward Executive	No		Yes	Adviser/Assistant	D	SA	SA	A	A	D	A	SA	SA	SA	D	A	D	A	D	A	SA	A	SA	D	SD	D	D	SD	SD	D	N	4. Decentralized organizational structure could positively influence the recruitment and retention of members in a party	36	152
2024-05-01 13:18:14	46-55	Male	HND/BSC/(FIRST DEGREE)	NW	Kaduna	Jema'a	Kagoma	Yes	PDP	16+ yrs	No			No		No		Yes	Adviser/Assistant	SA	A	A	SA	A	N	N	N	A	A	A	N	D	A	N	N	A	A	N	D	D	N	N	D	N	N	SA	5. Commitment of party members is enhanced when they participate in decision-making process of the party]	173	21
2024-05-01 19:53:58	66 and above	Male	POSTGRADUATE	SW	Lagos	Lagos Mainland	Ward K.	Yes	PDP	16+ yrs	Yes	APC		No		No		No		SA	A	A	SA	SA	N	SA	SA	SA	SD	SA	SA	SD	A	D	D	SA	SA	SD	SA	SA	SA	SA	SA	A	D	SA	6. My party allows individual members opinion in reaching decisions]	30	36
2024-05-02 18:40:30	56-65	Male	POSTGRADUATE	NW	Kaduna	Zaria LG	Kwarbai A	Yes	PDP	16+ yrs	Yes	Labour Party	Hijack of Party Structure	Yes	National Executive	No		Yes	Adviser/Assistant	SD	D	D	D	SA	D	SA	SA	A	N	SA	SA	D	N	N	N	N	SA	N	N	D	N	D	D	A	N	SA	7. I have always paid my monthly dues.]	54	97
2024-05-03 13:10:48	36-45	Male	POSTGRADUATE	NC	Nasarawa	KEANA	IWAGU	Yes	PDP	16+ yrs	No			No		No				SA	SA	SA	SA	SA	SA	SA	SA	SA	A	SA	SA	SA	SA	SA	SA	A	A	SA	SA	SA	SA	SA	A	SA	SA	SA	8 . Party leaders sometimes pay dues for members]	76	115
2024-05-03 14:04:18	46-55	Male	HND/BSC/(FIRST DEGREE)	NC	Nasarawa	Doma LGA	Galadima Ward	Yes	PDP	16+ yrs	No			Yes	LG Executive	No		No		SA	SA	SA	SA	SA	SA	A	SA	SA	A	SA	SA	D	A	SA	SA	D	A	D	A	A	SA	SA	A	N	A	A	9. Infact, party leaders finance the party activities and programmes]	161	31
2024-05-03 14:14:31	36-45	Male	HND/BSC/(FIRST DEGREE)	NC	Nasarawa	Keana local government	Obene Ward	Yes	PDP	16+ yrs	No			Yes	Ward Executive					SA	SA	SA		SA	SA	A	A	A	A	SA	A	A	SA	SA	A	A	SA	SA	SA	A	SA	SA	A	A	SA	SA	10. Not taking part in decision making affects the sense of party ownership and commitment among members]	89	26
2024-05-03 14:37:40	56-65	Male	HND/BSC/(FIRST DEGREE)	NC	Nasarawa	Awe	Tunga	Yes	PDP	16+ yrs	No			Yes	State Executive	No		No		SA	SA	SA	A	SA	SA	A	SA	SA	SA	SA	SA	SA	SA	SA	SA	SA	SA	SA	SA	SA	SA	SA	A	A	SA	SA	11. The centralized pattern of decision making in the party positively affects party membership stability]	29	81
2024-05-03 15:07:34	36-45	Male	WAEC/NECO	NC	Nasarawa	Toto	Ugya	Yes	PDP	16+ yrs	No			No		No		No																													12.Granting of more autonomy to local party chapters/branches could positively impact in their ability to retain members and foster loyalty]	37	138
2024-05-03 15:46:39	46-55	Male	POSTGRADUATE	NC	Nasarawa	Doma	Agbashi	Yes	PDP	6-10 yrs	Yes	APGA	Imposition of Candidates	No		No		No		SA	SA	SA	A	SA	SA	A	A	SA	A	A	A	N	A	SA	SA	SD	SA	SA	A	N	A	A	N	A	A	SA
2024-05-04 00:21:53	56-65	Female	POSTGRADUATE	NW	Kaduna	SANGA	NINZO NORTH WARD	Yes	PDP	16+ yrs	Yes		Imposition of Candidates	Yes	State Executive	Yes	State Assembly	Yes	Cabinet/Exco		A	A	A	SA	A	N	N	A	A		SA	SA	A	A	SA	A	N	N	A	N	A	A	N	N	A	A		Are there significant differences in the relationships between decentralized party organization and inclusive local participation in decision making in your Party?
2024-05-04 11:39:21	46-55	Male	POSTGRADUATE	SS	Delta	Ndokwa West	Ward 3	Yes	PDP	16+ yrs	No			Yes	State Executive	No		Yes	Adviser/Assistant	SA	SA	SA	SA	A	SA	N	N	N	D	A	N	SA	A	A	A	SD	SD	D	D	SA	SA	SA	A	A	A	A	Questions	SA	A
2024-05-05 07:47:34	46-55	Male	POSTGRADUATE	SE	Imo	Aboh Mbaise	Uvuru 1	Yes	PDP	16+ yrs	Yes	Anpp	Hijack of Party Structure	Yes	State Executive	No		Yes	Adviser/Assistant	A	A	D	D	A	D	A	A	A	D	D	D	D	D	A	D	D	D	D	D	D	A	A	N	D	D	D	1. Strong national party leadership’s control hinders the level of local autonomy in decision-making processes of our party]	14	79
2024-05-05 10:37:22	56-65	Male	WAEC/NECO	NC	Nasarawa	Keana	Kwara	Yes	PDP	16+ yrs	No	PDP		Yes	Ward Executive	No		Yes	Cabinet/Exco	SA	SA	SA	SA	SA	SA	SA	SA	SA	SA	SA	SA	SA	SA	SA	SA	SA	SA	SA	SA	SA	SA	SA	SA	SA	SA	SA	2. All Chapters/Branches of our party have reliable sources of funding]	19	31
2024-05-06 10:12:46	36-45	Male	POSTGRADUATE	NC	Nasarawa	Wamba	Wayo	Yes	PDP	11-15 yrs	No			No		No		No		SA	SA	SA	SA	SA	N	N	N	A	N	N	D	D	N	A	N	D	N	N	D	SD	A	SA	SD	SD	N	N	3.The nature of power distribution amongst our party Chapters/Branches ensures the inclusion of diverse local viewpoints in decision-making]	15	31
2024-05-06 18:05:46	36-45	Male	POSTGRADUATE	NC	Nasarawa	Keana	Kadarko	Yes	PDP	11-15 yrs	No			Yes	Ward Executive	No		Yes	Cabinet/Exco	SA	SA	A	SA	SA	A	A	A	A	SA	SA	SA	A	A	SA	SA	A	SA	SA	A	D	SA	SA	D	SD	SA	SA	4. The pattern of decision made at the Chapters/Branches of our party influences national party decision]	21	24
2024-05-06 18:07:22	46-55	Male	POSTGRADUATE	NC	Nasarawa	Keana	Giza Galadima	Yes	PDP	16+ yrs	No			Yes	Zonal Executive	No		No		SA	A	SA	SA	SA	SA	SA	SA	SA	SD	SA	SA	SA	SA	A	A	SA	A	A	SA	N	N	A	N	N	SA	A	5. The current structure of my party encourages members from diverse background to participate in decision making process]	31	68
2024-05-06 19:26:23	46-55	Female	HND/BSC/(FIRST DEGREE)	NC	Nasarawa	Doma	Galadima ward Doma	Yes	PDP	16+ yrs	No			Yes	State Executive	Yes	Ward Councilor	No		SA	SA	SA	SA	SA	SA	A	A	A	SA	SA	A	A	SA	A	A		SA	SA	SA	A	A	A	N	A	SA	A	6. The conduct of party primaries by national leadership of our party discourages accountability of elected representatives to their local branches]	30	113
2024-05-06 19:59:47	46-55	Male	HND/BSC/(FIRST DEGREE)	NC	Nasarawa	Akwanga	Andaha	Yes	PDP	16+ yrs	No			Yes	LG Executive	No		No		SA	SA	SA	SA	SA	A	SA	A	A	A	SA	A	A	A	A	SA	A	SA		SA	A	SA	SA	N	SA	SA	SA	7. Consideration of diverse viewpoints from Chapters/Branches could enhance greater participation in decision-making in a party]	22	83
2024-05-06 21:15:23	46-55	Male	HND/BSC/(FIRST DEGREE)	NC	Nasarawa	Obi	Kyakale	Yes	PDP	16+ yrs	No			Yes	LG Executive	No		No		SA	SA	SA	SA	SA	A	SA	A	SA	SA	SA	SA	D	N	A	N	SA	D	SD	A	A	SA	SA	A	SA	SA	SA	8. Strong national party leadership’s control of Chapters/Branches enhances greater members participation in party affairs]	20	20
2024-05-07 07:01:03	26-35	Male	HND/BSC/(FIRST DEGREE)	NC	Nasarawa	Keana LGA	Kadarko	Yes	PDP	16+ yrs	No			Yes	State Executive	No		No		A	SA	SA	A	SA	SA	SA	SA	SA	SA	SA	SA	A	SA	SA	A	SA	A	SA	SA	A	SA	SA	A	A	A	SA	9. My party (from Ward to zonal levels) organizes congresses and primaries at various levels, without interference from the national leadership ]	56	51
2024-05-07 08:54:57	46-55	Male	HND/BSC/(FIRST DEGREE)	NC	Nasarawa	Toto	Shafa kwotto	Yes	PDP	16+ yrs	No	PDP		Yes	LG Executive	No		Yes	Adviser/Assistant	SA	SA	SA	SA	SA	SA	SA	A	SA	SA	SA	SA	SA	SA	SA	SA	SA	SA	SA	SA	SA	SA	SA	SA	SA	SA	SA		How does the level of decentralization of party structures enhance their ideologies in Nigeria ?
2024-05-07 14:59:29	36-45	Male	HND/BSC/(FIRST DEGREE)	NC	Nasarawa	Lafia	Assakio	Yes	PDP	16+ yrs	No			No		Yes	State Assembly			SA	SA	SA	A	A	A	SA	SA	A	SA	SA	A	A	A	A	A	A	A	A	SA	SA	SA	A	SA	A	A	A	Questions	SA	A
2024-05-07 17:06:14	66 and above	Male	NCE/ND/TCII	NW	Nasarawa	KEANA	Madaki	Yes	PDP	16+ yrs	No			Yes	LG Executive	Yes	Ward Councilor	No		SA	SA	SA	A	SA	A		A	A	A	A					SA	A	A		A		SA	SA			A	SA	1. My party has a training institute where its policies and programs are developed]	88	75
2024-05-07 18:22:57	36-45	Male	HND/BSC/(FIRST DEGREE)	NC	Nasarawa	Lafia	Assakio	Yes	PDP	16+ yrs	No			Yes	Ward Executive	No		Yes		SA	SA	SA	SA	SA	SA	SA	SA	SA	SA	SA	SA	SA	SA	SA	SA	SA	SA	SA	SA	SA	SA	SA	SA	SA	SA	SA	2. I know my parties ideologies policies and programs]	65	73
2024-05-07 18:26:26	36-45	Male	HND/BSC/(FIRST DEGREE)	NC	Nasarawa	Obi	Agwatashi	Yes	PDP	16+ yrs	No			No		No		No		SA	SA	SA	SA	SA	SA	A	SA	SA	SA	SA	SA	SA	SA	A	SA	A		SA	A	SA	N	SA	A	SA	SA	SA	3. I believe in the ideologies and work to achieve the policies and programs of my party. ]	43	103
2024-05-09 10:21:18	46-55	Male	HND/BSC/(FIRST DEGREE)	NE	Adamawa	Hong	Bangshika	Yes	PDP	16+ yrs	No			Yes	State Executive	No		Yes	Adviser/Assistant	SA	A	N	A	A	A	N	A	SA	A	A	A	N	SA	N	SA	A	N	D	SA	N	A	SA	N	D	A	N	4. National ,zonal and state leaders are trained at the institute]	31	88
2024-05-09 14:55:09					Adamawa	Jada	Jada 1	Yes	PDP	16+ yrs	No			Yes	State Executive	No		Yes	Cabinet/Exco	SA	SA	SA	SA	SA	SA	SA	SA	SA	SA	SA	A	A	A	A	SA	A	SA	SA	SA	A	A	A	A	A	SA	A	5. Party Chapter/Branches train and inculcate in members its policies and programs.]	21	60
2024-05-09 16:05:59	36-45	Female	POSTGRADUATE	SS	Delta	UDU	Ward 4	Yes	PDP	11-15 yrs	No			Yes	State Executive	No		Yes	Special Assistant, senior special Assistant	SA	SA	SA	A	SA	A	A	SA	A	A	A	SA	A	A	A	A	A	A	A	A	N	A	A	N	A	A	A	6. Effective distribution of power among party chapters and branches promotes understanding of party ideologies, policies and programs]	30	156
2024-05-11 21:34:38	36-45	Male	HND/BSC/(FIRST DEGREE)	NE	Adamawa	Song	Dirma	Yes	PDP	16+ yrs	Yes	ACN	Imposition of Candidates	No		No		Yes	SSA	SA	SA	SA	A	SA		N	A	SA	SA	A	A	A	SA	A	A	N	SA	SA	A	SA	SA	SA	A	A	A	SA
2024-05-12 14:11:04	46-55	Male	POSTGRADUATE	SW	Lagos	Oshodi Isolo	Mafoluku Ward	Yes	PDP	16+ yrs	Yes	AD Alliance For Democracy	Hijack of Party Structure	Yes	LG Executive	Yes	State Assembly	Yes	National Delegate	SA	D	SD	A	D	N	N	A	SA	A	D	SA	SD	SD	SA	D	D	D	SA	SD	SA	A	A	N	N	SD	SA
2024-05-12 17:12:55	36-45	Male	HND/BSC/(FIRST DEGREE)	SW	Lagos	Oshodi	Ewu ward	Yes	PDP	11-15 yrs	No			No		No		No		SA	SA	SA	SA	SA	SA	A	SA	SA	SA	SA	SA	A	SA	SA	SA	A	SA	A	SA	A	SA	SA	A	A	SA	SA
2024-05-12 17:17:12	56-65	Male	POSTGRADUATE	SW	Lagos	Lagos Island	Ward F2, Ilasamaja	Yes	PDP	11-15 yrs	Yes	APC	Imposition of Candidates	No		No		Yes	National Campaign council	SA	SA	SA	SA	SA	SA	A	SA	SA	SA	SA	SD	SA	SA	A	A	SA	A	SA	SD	SA	SA	SA	SD	A	A	SA
2024-05-12 17:45:59	46-55	Male	HND/BSC/(FIRST DEGREE)	SW	Lagos	Ojo	Yaba/Ojuelegba in Surulere, Lagos	Yes	PDP	16+ yrs	No			Yes	State Executive	No		No		SA	SA	SD	SA	SA	D	SA	SA	N	D	SA	SA	SD	SA	A	SD	SA	SD	SA	SA	SA	SA	SA	SA	SA	SD	SA
2024-05-12 21:51:28	46-55	Male	NCE/ND/TCII	NE	Adamawa	Mubi south	Gella ward	Yes	PDP	16+ yrs	No			Yes	Zonal Executive	Yes	Ward Councilor	Yes	Adviser/Assistant	SA	SA	SA	SA	SA	SA	SA	SA	A	SA	SA	SA	SA	SA	SA	SA	SA	SA	SA	A	SA	SA	SA	A	A	SA	SA
2024-05-12 23:53:58	46-55	Male	HND/BSC/(FIRST DEGREE)	SE	Enugu	Awgu	C	Yes	PDP	16+ yrs	No			Yes	State Executive	Yes	Ward Councilor	No		SA	A	A	SA	SA	D	D	D	SD	D	SA	A	N	N	N	A	SA	A	N	N	N	D	D	N	A	D	SA	How does decentralized organizational structure impact on the membership stability of your Party?
2024-05-13 05:57:49	46-55	Male	HND/BSC/(FIRST DEGREE)	NE	Adamawa	Girei	Girei 1	Yes	PDP	16+ yrs	Yes	AC/ACN	Hijack of Party Structure	No		No		No		SA	SA	SA	SA	SA	SA	A	SA	SA	SA	SA	SA	A	A	A	SA	SA	A	SA	A	SA	A	A	A	A	A	SA
2024-05-13 06:42:21	46-55	Male	HND/BSC/(FIRST DEGREE)	NC	Adamawa	Toungo	Toungo 1	Yes	PDP	16+ yrs	No			No		Yes	State Assembly			SA	SA	SA	SA	SA	SA		SA	SA		SA	SA	SA	SA	SA	SA	SA	SA	A	A	SA	SA	SA	SA	A	SA	A
2024-05-13 14:09:40	56-65	Male	POSTGRADUATE	SW	Lagos	Epe	J1	Yes	PDP	16+ yrs	No			Yes	State Executive	No		Yes	Lagos East coordinator for Sure-P	A		SA	A	SA	A	A	A	SA	SA	A	A	N	A	A	A	N	A	N	A	A	SA	SA	N	N	A	A
2024-05-13 16:23:29	56-65	Male	POSTGRADUATE	SW	Ogun	Abeokuta north	Ward di	Yes	PDP	11-15 yrs	Yes	AD	Factionalization	Yes	LG Executive	Yes	MFR	No		SA	SA	A	A	A	A	A	A	N	A	A	A	N	A	A	A	N	A	N	N	A	A	A	N	A	A	A
2024-05-13 16:26:52	46-55	Male	HND/BSC/(FIRST DEGREE)	SW	Ondo	Ilaje local government	Ward j	Yes	PDP	16+ yrs	No			Yes	State Executive					SA	A	SA	SA	SA	SA	SA	SA	A	A	A	A	A	SA	A	SA	A	A	SA	SA	A	A	SA	SD	D	SA	SD
2024-05-14 12:15:44	56-65	Male	POSTGRADUATE	SW	Lagos	Epe	A4	Yes	PDP	16+ yrs	No			No		No		No		SA	A	N	N	A	N	D	SA	N	D	D	SA	D	D	N	N	A	SD	SD	N	D	SA	SA	SD	SD	D	N
2024-05-14 16:53:35	56-65	Male	HND/BSC/(FIRST DEGREE)	NE	Adamawa	Demsa	Borrong	Yes	PDP	1-5 yrs	No			No		No		Yes	Adviser/Assistant	SA	SA	A	SA	A	N	D	A	A	A	A	N	D	A	A	SD	SD	N	SD	N	A	A	A	N	D	D	D
2024-05-14 19:16:00	56-65	Male	POSTGRADUATE	SW	Lagos	Lagos Island	Langbasa	Yes	PDP	16+ yrs	No			Yes	State Executive	No		No		SA	D	N	SA	SA	SA	SA	A	SA	D	A	N	SD	N	N	A	A	A	N	SD	SA	SA	SA	A	N	N	A
2024-05-15 08:00:02	46-55	Female	NCE/ND/TCII	NE	Adamawa	LAMURDE LOCAL GOVERNMENT.	GYAWANA .	Yes	PDP	16+ yrs	No			Yes	LG Executive	No		Yes	VICE CHAIRMAN TRANSITION COMMITTEE.	SA	SA	SA	A	SA	A	A	A	SA	SA	A	A		A	A	A	A	A	A	A	A	A	SA	A	A	SA	A
2024-05-15 20:44:28	36-45	Female	NCE/ND/TCII	SS	Delta	Aniocha North	Onicha Ugbo	Yes	PDP	1-5 yrs	Yes	APC	Non Inclusion in Decision-making, Imposition of Candidates, Hijack of Party Structure	Yes	LG Executive	No		Yes	Adviser/Assistant	SA	SA	D	A	SA	N	A	SA	SA	SD	A	SA	D	D	D	D	A	A	SD	D	A	A	N	A	D	D	A
2024-05-15 21:19:36	66 and above	Male	POSTGRADUATE	SW	Lagos	Badagry	Ward E	Yes	PDP	16+ yrs	No			Yes		Yes		Yes	Boards	SA	SA	A	SA	A	A	A	A	A	A	SA	A	D	A	A	SA	SA	A	N	A	A	SA	A	N	A	A	A
2024-05-15 21:48:42	56-65	Male	POSTGRADUATE	NC	Nasarawa	Akwanga	Gwanje Gwanje	Yes	PDP	11-15 yrs	No			Yes	National Executive	Yes	MFR	Yes	Cabinet/Exco	SA	SA	A	N	D	A	SA	SA	A	A	D	D	A	A	A	A	D	D	A	A	SA	SA	SA	SA	A	A	D
2024-05-15 21:58:05	46-55	Female	POSTGRADUATE	NC	Nasarawa	Keffi	Angwan Iya 1	Yes	PDP	6-10 yrs	Yes	APC	Non Inclusion in Decision-making, Imposition of Candidates, Hijack of Party Structure	Yes	Zonal Executive	Yes	State Assembly	Yes	Boards	SA	SA	D	SA	SA	A	A	SA	SA	D	A	A	D	D	A	A	SA	SA	SD	D	SA	A	A	A	N	D	A
2024-05-15 22:05:09	36-45	Female	NCE/ND/TCII	NC	Nasarawa	Karu	Karshi 1	Yes	PDP	6-10 yrs	No			No		Yes	Ward Councilor	No		SA	D	SD	SA	SA	D	A	SA	SA	SD	A	SA	D	A	A	A	SA	A	SD	D	SA	N	N	A	D	D	A
2024-05-15 22:17:25	46-55	Female	WAEC/NECO	NC	Nasarawa	Lafia	Assakio	Yes	PDP	6-10 yrs	Yes	APC	Non Inclusion in Decision-making, Imposition of Candidates, Hijack of Party Structure	No		No		No		SA	A	SD	A	SA	D	A	SA	SA	SD	A	SA	D	A	A	D	SA	A	D	D	SA	A	A	A	N	D	A
2024-05-15 22:29:57	26-35	Female	HND/BSC/(FIRST DEGREE)	NC	Nasarawa	Nasarawa Egon	Agwuji/Ogbagi	Yes	PDP	6-10 yrs	No			Yes	Ward Executive	No		No		SA	A	D	A	SA	N	A	SA	SA	D	A	SA	D	A	A	A	SA	SA	SD	SD	A	A	N	N	D	D	A
2024-05-15 22:48:01	66 and above	Female	NCE/ND/TCII	NC	Nasarawa	Wamba	Wayo	Yes	PDP	16+ yrs	No			Yes	Ward Executive	No		Yes	Cabinet/Exco	SA	A	D	A	SA	N	A	SA	SA	SD	A	SA	D	D	D	D	A	A	SD	D	A	A	A	A	D	D	A
2024-05-17 18:45:10	46-55	Male	POSTGRADUATE	NC	Nasarawa	Awe	Tunga	Yes	PDP	6-10 yrs	Yes	APC	Imposition of Candidates, Hijack of Party Structure	No		Yes	MFR			SA	A	D	SA	SA	A	A	SA	SA	D	N	SA	D	D	D	D	A	A	D	D	SA	SA	SA	A	N	N	A
2024-05-17 18:51:32	46-55	Female	HND/BSC/(FIRST DEGREE)	SS	Delta	Aniocha North	Isselle Uku 1	Yes	PDP	11-15 yrs	No			Yes	State Executive	No				SA	A	D	A	SA	A	SA	SA	SA	D	A	SA	D	A	A	A	A	A	D	D	SA	A	A	SA	N	D	A
2024-05-17 18:57:26	36-45	Male	POSTGRADUATE	SS	Delta	Bomadi	Akugbene 11	Yes	PDP	6-10 yrs	No			Yes	State Executive	No				SA	A	D	A	SA	A	SA	SA	SA	SD	A	SA	D	D	D	SD	A	A	SD	D	SA	A	A	A	N	D	A
2024-05-17 19:54:57	36-45	Male	HND/BSC/(FIRST DEGREE)	SS	Delta	Ughelli South	Ewu 11	Yes	PDP	6-10 yrs	No			No		Yes	Ward Councilor	No		SA	A	D	A	SA	N	A	SA	SA	D	A	A	D	D	D	D	A	A	SD	SD	A	A	A	A	A	D	A
2024-05-18 10:00:52	46-55	Female	HND/BSC/(FIRST DEGREE)	SS	Delta	Oshimili North	Okpanam	Yes	PDP	11-15 yrs	No			No		Yes	State Assembly	Yes	Adviser/Assistant	SA	A	N	A		A	A	SA	SA	D	A	A	N	D	D	D	D	A	D	D	SA	A	A	A	A	SA	A
2024-05-18 11:18:01	56-65	Female	FSLC	NE	Adamawa	Fufore	Ribadu	Yes	PDP	11-15 yrs	No			Yes	State Executive	No		Yes	Adviser/Assistant	SA	A	D	A	SA	N	A	SA	SA	D	A	A	N	D	D	D	SA	A	SD	D	SA	A	A	A	A	N	A
2024-05-18 11:22:57	18-25	Female	NCE/ND/TCII	NE	Adamawa	Gombi	Yang	Yes	PDP	1-5 yrs	No			Yes	Ward Executive	No		No		SA	SA	N	A	SA	N	A	SA	SA	SD	A	A	N	N	D	D	A	A	D	SD	SA	N	N	A	N	N	A
2024-05-18 11:31:53	56-65	Female	FSLC	NE	Adamawa	Ganye	Yebbi	Yes	PDP	16+ yrs	No			Yes	State Executive	Yes	State Assembly	Yes	Cabinet/Exco	SA	A	D	A	SA	SA	A	SA	SA	D	A	A	A	D	D	D	A	A	SD	D	SA	A	A	SA	A	N	A
2024-05-18 17:59:38	56-65	Male	POSTGRADUATE	NC	Nasarawa	Toto	Shaffa kwotto	Yes	PDP	16+ yrs	No			Yes	National Executive	Yes	State Assembly	Yes	Cabinet/Exco	SA	SA	A	N	SA	SD	A	SA	A	A	N	D	SA	A	A	A	D	A	A	A	SA	SA	SA	SA	A	A	A
2024-05-18 19:57:58	36-45	Female	HND/BSC/(FIRST DEGREE)	NC	Nasarawa	Keffi	Angwan Iya 1	Yes	PDP	11-15 yrs	No			Yes	State Executive	Yes	State Assembly	No		SA	A	N	A	SA	SA	A	SA	SA	D	A	SA	D	D	D	D	SA	A	D	D	SA	A	A	SA	A	N	A
2024-05-18 20:33:42	26-35	Male	WAEC/NECO	NE	Adamawa	Mubi South	Gella	Yes	PDP	1-5 yrs	Yes	APC	Imposition of Candidates, Hijack of Party Structure	Yes	Ward Executive	No		No		SA	A	D	A	SA	N	A	SA	SA	D	A	A	D	D	D	D	SA	A	D	D	A	N	N	A	N	D	A
2024-05-18 21:18:08	36-45	Male	WAEC/NECO	NE	Adamawa	Mayo Belwa	Binyeri	Yes	PDP	11-15 yrs	No			Yes	LG Executive	No		Yes	LGA Supervisor	SA	SA	D	A	SA	A	A	SA	SA	SD	A	SA	D	D	SD	D	A	A	SD	D	SA	A	N	A	N	N	A
2024-05-18 21:25:43	66 and above	Male	WAEC/NECO	NE	Adamawa	Maiha	Humbutudi	Yes	PDP	16+ yrs	No			Yes	Zonal Executive	Yes	MFR	Yes	Cabinet/Exco	SA	SA	D	A	SA	SA	A	SA	SA	D	A	A	N	D	SD	N	N	A	N	N	SA	A	A	SA	A	N	A
2024-05-18 21:34:31	56-65	Female	HND/BSC/(FIRST DEGREE)	NE	Adamawa	Michika	Bazza Margi	Yes	PDP	1-5 yrs	Yes	APC	Imposition of Candidates, Hijack of Party Structure	Yes	LG Executive	No		Yes	Adviser/Assistant	SA	A	D	A	SA	A	A	SA	SA	SD	A	A	D	D	SD	D	SA	A	D	D	SA	N	N	A	N	N	A
2024-05-18 21:48:07	26-35	Female	NCE/ND/TCII	NE	Adamawa	Yola North	Yelwa	Yes	PDP	6-10 yrs	No			Yes	Ward Executive	No		Yes	Supervisory Of Works	SA	A	D	SA	SA	A	A	SA	SA	D	A	A	D	D	D	A	A	A	D	D	SA	A	A	A	D	N	A
2024-05-19 04:29:53	36-45	Female	WAEC/NECO	NE	Adamawa	Song	Dirma	Yes	PDP	6-10 yrs	Yes	APC	Imposition of Candidates, Hijack of Party Structure	Yes	Ward Executive	No		Yes	LGA Supervisor	SA	A	D	A	SA	N	A	SA	SA	D	A	A	N	D	D	D	A	A	D	SD	A	A	A	A	N	D	A	Are there significant differences in the relationships between decentralized party organization and inclusive local participation in decision making in your Party?
2024-05-19 05:05:17	36-45	Female	WAEC/NECO	NE	Adamawa	Mubi South	Dirb8shu/Gandira	Yes	PDP	6-10 yrs	No			No		No		Yes	Adviser/Assistant	SA	SA	D	A	SA	A	A	SA	SA	D	A	A	N	N	N	N	A	A	D	D	A	N	N	A	N	D	A
2024-05-19 08:01:32	36-45	Male	WAEC/NECO	NE	Adamawa	Gombi	Duwa	Yes	PDP	1-5 yrs	Yes	APC	Imposition of Candidates, Hijack of Party Structure	No		No		No		SA	SA	N	A	SA	N	A	SA	SA	D	A	SA	SD	D	D	D	SA	D	SD	SD	SA	N	N	A	N	D	A
2024-05-19 08:24:05	26-35	Female	FSLC	NE	Adamawa	Mayo Belwa	Gorobi	Yes	PDP	6-10 yrs	Yes	APC	Imposition of Candidates, Hijack of Party Structure	No		No		No		SA	SA	SD	A	SA	N	A	SA	SA	D	A	A	SD	SD	SD	SD	SA	A	SD	SD	SA	A	A	N	N	D	A
2024-05-19 08:37:45	56-65	Male	WAEC/NECO	NE	Adamawa	Hong	Goya	Yes	PDP	11-15 yrs	No			No		No		Yes	Adviser/Assistant	SA	SA	D	A	SA	A	A	SA	SA	D	A	A	SD	SD	SD	D	A	A	SD	SD	SA	A	A	A	N	SD	A
2024-05-19 10:58:13	18-25	Female	FSLC	NE	Adamawa	Yola South	Yolde Kohi	Yes	PDP	1-5 yrs	No			No		No		No		SA	SA	SD	A	SA	N	A	A	SA	D	A	A	N	D	D	D	SA	A	D	SD	A	A	N	A	N	N	A
2024-05-19 11:03:11	36-45	Female	WAEC/NECO	NE	Adamawa	Numan	Bolki	Yes	PDP	6-10 yrs	No			No		Yes	Ward Councilor	No		SA	A	D	A	SA	N	A	SA	SA	D	A	A	D	D	D	D	SA	A	D	SD	SA	A	A	A	N	D	A
2024-05-19 11:10:20	46-55	Female	WAEC/NECO	NE	Adamawa	Toungo	Toungo 111	Yes	PDP	11-15 yrs	No			No		No		Yes	Boards	SA	SA	N	A	SA	N	A	A	SA	D	A	A	D	D	D	D	A	A	D	D	A	A	A	A	N	D	A
2024-05-19 15:42:43	36-45	Female	NCE/ND/TCII	SW	Delta	Sapele	Sapele Urban 111	Yes	PDP	6-10 yrs	No			Yes	LG Executive	Yes	Ward Councilor	Yes	Boards	SA	SA	D	A	SA	N	A	SA	SA	D	A	A	D	D	D	D	A	A	D	D	A	N	N	A	N	D	A
2024-05-19 15:52:36	46-55	Female	NCE/ND/TCII	SS	Delta	Ughelli South	Jeremi 11	Yes	PDP	6-10 yrs	Yes	APC	Imposition of Candidates, Hijack of Party Structure	Yes	LG Executive	No		No		SA	SA	D	A	SA	A	A	A	SA	D	A	A	N	D	SD	D	A	A	D	D	SA	A	A	A	N	N	A
2024-05-20 23:49:22	46-55	Female	HND/BSC/(FIRST DEGREE)	SS	Delta	Ethiope East	Agbona 11	Yes	PDP	6-10 yrs	Yes	APC	Imposition of Candidates, Hijack of Party Structure	Yes	LG Executive	No		No		SA	A	D	A	SA	A	A	A	SA	D	A	A	N	D	D	D	A	A	D	D	SA	N	N	A	N	SD	A
2024-05-21 08:51:42	26-35	Female	NCE/ND/TCII	SS	Delta	Ika North East	Umunede	Yes	PDP	6-10 yrs	Yes	APC	Imposition of Candidates	Yes	Ward Executive	No		No		SA	A	D	A	SA	N	A	SA	SA	D	A	A	SD	D	D	D	A	A	D	D	A	N	N	A	N	D	A
2024-05-21 08:59:45	18-25	Male	WAEC/NECO	SS	Delta	Ika North East	Akumazi	Yes	PDP	1-5 yrs	No			Yes	Ward Executive	No		No		SA	A	SD	A	SA	N	A	SA	SA	D	A	A	D	D	SD	D	A	A	D	D	A	N	N	A	N	D	A
2024-05-21 09:18:18	36-45	Male	HND/BSC/(FIRST DEGREE)	SS	Delta	Ethiope West	Jesse 111	Yes	PDP	6-10 yrs	No			Yes	Ward Executive	No		No		SA	A	SD	A	SA	N	A	SA	SA	D	A	A	D	D	SD	SD	A	A	D	D	SA	A	A	A	N	D	N
2024-05-21 10:14:16	26-35	Female	WAEC/NECO	SS	Delta	Okpe	Orerokpe	Yes	PDP	6-10 yrs	No			No		No		Yes	Adviser/Assistant	SA	A	N	A	SA	D	N	A	A	D	A	A	N	D	D	D	A	A	D	D	A	N	N	A	N	N	A
2024-05-21 10:37:19	18-25	Male	WAEC/NECO	SS	Delta	Patani	Patani 111	Yes	PDP	6-10 yrs	No			No		Yes	Ward Councilor	Yes	Adviser/Assistant	SA	SA	D	A	SA	A	A	SA	SA	D	A	A	D	D	D	D	A	A	D	D	A	N	N	A	N	D	A
2024-05-21 10:58:54	46-55	Male	POSTGRADUATE	SS	Delta	Uvwie	Effurun 11	Yes	PDP	6-10 yrs	No			No		No		Yes	LGC Supervisor	SA	A			SA	N	A	SA	SA	D	A	A	D	D	D	D	A	A	D	D	A	A	A	A	N		A
2024-05-21 11:21:08	36-45	Male	HND/BSC/(FIRST DEGREE)	SS	Delta	Udu	Udu 111	Yes	PDP	6-10 yrs	No			No		No		Yes	Boards	SA	A	D	A	SA	A	A	SA	SA	D	A	A	D	D	D	D	A	A	D	D	A	A	N	A	N	N	A
2024-05-21 11:43:35	46-55	Female	HND/BSC/(FIRST DEGREE)	SS	Delta	Oshimili North	Illah	Yes	PDP	11-15 yrs	Yes	APC	Imposition of Candidates, Hijack of Party Structure	No		No		Yes	Cabinet/Exco	SA	SA	D	A	SA	A	A	SA	SA	D	A	A	D	D	D	D	A	A	D	D	A	A	A	A	N	D	A
2024-05-22 21:26:35	36-45	Male	NCE/ND/TCII	SS	Delta	Warri South West	Orere	Yes	PDP	6-10 yrs	No			No		No		Yes	Adviser/Assistant	SA	A	D	A	SA	N	A	A	SA	D	A	A	N	D	D	D	A	A	D	D	A	A	A	A	N	D	A
2024-05-22 21:51:03	26-35	Female	WAEC/NECO	SS	Delta	Oshimili South	Umuezie	Yes	PDP	6-10 yrs	Yes	APC	Imposition of Candidates	No		No		No		SA	SA	D	A	SA	N	A	SA	SA	D	A	A	D	D	SD	D	A	A	D	D	A	N	N	A	N	D	A	How does the level of decentralization of party structures enhance their ideologies in Nigeria ?
2024-05-22 22:11:00	18-25	Male	WAEC/NECO	SS	Delta	Ndokwa East	Olomoro	Yes	PDP	11-15 yrs	No			No		No		Yes	Boards	SA	SA	SD	A	SA	N	A	A	SA	D	A	A	N	D	SD	D	A	A	D	D	A	N	A	A	N	D	A
2024-05-22 22:41:02	56-65	Male	HND/BSC/(FIRST DEGREE)	NC	Nasarawa	Doma	Galadima	Yes	PDP	16+ yrs				No		Yes	Senator			SA	SA	N	A	SA	A	A	SA	SA	N	A	N	N	N	N	N	D	A	N	N	SA	A	A	A	A	N	A
2024-05-22 22:49:03	56-65	Male	HND/BSC/(FIRST DEGREE)	NC	Nasarawa	Akwanga	Kwaje Kwanje	Yes	PDP	11-15 yrs	No			No		Yes	Senator	No		SA	SA	A	A	SA	SA	A	SA	SA	N	N	N	D	N	N	N	D	A	N	N	SA	SA	SA	A	A	A	A
2024-05-29 15:10:39	36-45	Male	HND/BSC/(FIRST DEGREE)	NC	Nasarawa	Obi	Obi	Yes	PDP	11-15 yrs	No			No		Yes	State Assembly	Yes	Boards	SA	A	N	A	SA	SA	SA	SA	SA	N	A	N	N	D	N	N	D	A	N	N	SA	A	SA	SA	N	N	N
2024-05-29 16:09:54	46-55	Male	HND/BSC/(FIRST DEGREE)	NC	Nasarawa	Keana	Iwagu	Yes	PDP	11-15 yrs	No			Yes	State Executive	Yes	MFR	Yes	Adviser/Assistant	SA	A	A	A	SA	SA	A	SA	SA	N	A	N	D	A	N	A	D	A	N	N	SA	SA	SA	SA	A	A	A
2024-05-29 16:23:22	36-45	Male	HND/BSC/(FIRST DEGREE)	NC	Nasarawa	Wamba	Wamba East	Yes	PDP	6-10 yrs	No			No		Yes	MFR	No		SA	SA	A	A	SA	SA	A	SA	A	N	A	N	N	N	N	N	D	A	N	A	SA	SA	SA	SA	A	N	A
2024-05-30 19:45:48	36-45	Female	HND/BSC/(FIRST DEGREE)	SE	Imo	Ahiazu Mbaise	Umunumo 11	Yes	PDP	11-15 yrs	No			Yes	State Executive	Yes	Ward Councilor	Yes	Adviser/Assistant	SA	A	D	A	SA	A	A	A	SA	D	A	A	D	D	SD	D	A	A	SD	SD	A	A	A	A	N	N	A
2024-05-30 19:51:18	26-35	Female	NCE/ND/TCII	SE	Imo	Ideato South	Ntueke	Yes	PDP	6-10 yrs	No			No		No		No		SA	SA	D	A	SA	D	A	A	SA	SD	A	A	SD	D	SD	D	A	A	D	SD	A	N	N	A	N	D	A
2024-05-30 20:00:02	66 and above	Male	NCE/ND/TCII	SE	Imo	Ihitte/Uboma	Amakohia	Yes	PDP	11-15 yrs	No			No		Yes	Ward Councilor	Yes	Boards	SA	SA	SD	A	SA	N	A	A	SA	D	A	A	D	D	SD	D	A	A	SD	SD	A	A	N	A	N	SD	A
2024-05-30 20:13:02	36-45	Female	HND/BSC/(FIRST DEGREE)	SE	Imo	Isu	Isu Njaba 111	Yes	PDP	6-10 yrs	No			Yes	LG Executive	No		Yes	Adviser/Assistant	SA	SA	D	A	SA	N	A	A	SA	SD	A	A	D	D	D	D	A	A	D	D	A	N	N	A	N	D	A
2024-05-30 20:23:30	46-55	Male	HND/BSC/(FIRST DEGREE)	SE	Imo	Ngor Okpalla	Ozuzu	Yes	PDP	11-15 yrs	No			No		Yes	Ward Councilor	Yes	Cabinet/Exco	SA	SA	D	A	SA	N	A	SA	SA	D	A	A	D	D	SD	D	A	A	SD	SD	SA	A	A	A	N	D	A
2024-05-30 20:47:56	36-45	Female	HND/BSC/(FIRST DEGREE)	SE	Imo	Njaba	Atta 11	Yes	PDP	1-5 yrs	Yes	APC	Factionalization, Non Inclusion in Decision-making, Imposition of Candidates, Hijack of Party Structure	No		No		Yes	Boards	SA	SA	D	A	SA	N	A	A	SA	SD	A	A	SD	D	SD	D	A	A	D	SD	A	A	A	A	N	D	A
2024-05-30 21:03:02	56-65	Male	POSTGRADUATE	SE	Imo	Obowo	Avutu	Yes	PDP	6-10 yrs	Yes	APC	Factionalization, Imposition of Candidates	No		No		No		SA	A	D	A	SA	N	A	A	SA	SD	A	A	D	D	SD	D	A	A	SD	SD	A	A	N	A	N	D	A
2024-05-30 21:11:51	26-35	Female	HND/BSC/(FIRST DEGREE)	SE	Imo	Ohaji/Egbema	Egbema A	Yes	PDP	1-5 yrs	No			No		No		No		SA	SA	D	A	SA	N	N	A	SA	D	A	A	D	D	SD	D	A	D	SD	SD	A	N	N	A	N	D	A
2024-05-31 06:11:40	26-35	Female	HND/BSC/(FIRST DEGREE)	SE	Imo	Ehime Mbano	Nzerem Ikpe	Yes	PDP	1-5 yrs	No			Yes	Ward Executive	No		No		SA	SA	D	A	SA	D	A	A	SA	D	A	A	SD	SD	SD	SD	A	A	D	SD	A	N	N	A	N	D	A
2024-05-31 08:44:53	36-45	Female	HND/BSC/(FIRST DEGREE)	SE	Imo	Ideato North	Izuogu	Yes	PDP	11-15 yrs	No			Yes	State Executive	No		Yes	Adviser/Assistant	SA	SA	N	A	SA	A	A	SA	SA	D	A	A	N	D	SD	D	A	A	D	SD	SA	A	A	SA	N	N	A
2024-05-31 08:53:37	46-55	Female	HND/BSC/(FIRST DEGREE)	SE	Imo	Ikeduru	Amaimo	Yes	PDP	6-10 yrs	Yes	APC	Factionalization, Imposition of Candidates, Hijack of Party Structure	Yes	State Executive	No	State Assembly	No		SA	SA	D	A	SA	A	A	SA	SA	D	A	A	N	D	SD	D	A	A	D	SD	SA	A	A	A	N	D	A
2024-05-31 09:02:03	18-25	Female	NCE/ND/TCII	SE	Imo	Isiala Mbano	Ogbor	Yes	PDP	1-5 yrs	No			Yes	Ward Executive	No		No		SA	A	D	A	SA	D	A	A	SA	D	A	A	SD	SD	SD	SD	A	A	D	SD	SA	N	N	A	N	D	A
2024-05-31 09:08:20	46-55	Male	POSTGRADUATE	SE	Imo	Mbaitolu	Ogbaku	Yes	PDP	11-15 yrs	No			Yes	State Executive	Yes	Ward Councilor	Yes	Boards	SA	SA	N	A	SA	A	A	SA	SA	D	A	A	N	D	SD	D	A	A	SD	SD	SA	A	A	A	N	N	A	How does decentralized organizational structure impact on the membership stability of your Party?a
2024-05-31 09:15:09	26-35	Female	NCE/ND/TCII	SE	Imo	Nkwerre	Owerre Nkworji	Yes	PDP	6-10 yrs	No			Yes	LG Executive	Yes	Ward Councilor	No		SA	A	D	A	SA	N	A	SA	SA	D	A	A	D	SD	SD	SD	A	A	D	SD	A	N	N	A	N	D	A
2024-05-31 09:29:46	36-45	Female	NCE/ND/TCII	SE	Imo	Oru West	Amagu	Yes	PDP	6-10 yrs	No			Yes	Ward Executive	No		No		SA	SA	D	A	SA	D	A	A	SA	SD	A	A	SD	SD	SD	SD	SA	A	D	SD	A	N	N	A	N	D	A
2024-05-31 09:35:19	56-65	Male	POSTGRADUATE	SE	Imo	Owerri West	Obinze	Yes	PDP	6-10 yrs	No			Yes	LG Executive	No		No		SA	A	D	A	SA	N	A	SA	SA	SD	A	A	D	D	SD	D	A	A	D	SD	SA	N	N	A	N	N	A
2024-05-31 14:07:45	66 and above	Male	HND/BSC/(FIRST DEGREE)	SE	Imo	Aboh Mbaise	Ibeku	Yes	PDP	16+ yrs	No			No		Yes	Ward Councilor	Yes	Cabinet/Exco	SA	SA	N	A	SA	A	A	SA	SA	D	A	A	SD	D	SD	D	A	A	D	SD	SA	SA	SA	A	N	N	A
2024-05-31 14:20:36	18-25	Female	NCE/ND/TCII	SE	Imo	Ezinihitte Mbaise	Eziudo	Yes	PDP	1-5 yrs	No			Yes	Ward Executive	No		No		SA	A	N	A	SA	D	A	A	SA	D	A	A	SD	SD	SD	SD	A	A	D	SD	A	N	N	A	N	D	A
2024-05-31 14:35:23	26-35	Female	NCE/ND/TCII	SE	Imo	Nwangele	Umuozu	Yes	PDP	6-10 yrs	Yes	APC	Factionalization, Hijack of Party Structure	Yes	LG Executive	No		Yes	LGA Supervisor	SA	SA	D	A	SA	N	A	SA	SA	D	A	A	D	D	SD	D	A	A	D	SD	A	N	N	A	N	D	A
2024-05-31 14:43:31	26-35	Female	HND/BSC/(FIRST DEGREE)	SE	Imo	Ahiazu Mbaise	Mpam	Yes	PDP	6-10 yrs	Yes	APC	Factionalization, Hijack of Party Structure	Yes	Ward Executive	No		No		SA	A	D	N	A	D	N	A	A	D	A	A	D	D	D	D	A	D	SD	D	A	N	N	A	N	N	A
2024-06-03 00:26:21	46-55	Female	WAEC/NECO	SE	Imo	Okigwe	Aguobu	Yes	PDP	11-15 yrs	No			No		No		Yes	Adviser/Assistant	SA	SA	N	A	A	N	A	A	A	D	A	A	N	D	SD	D	A	A	D	D	A	N	N	A	N	N	A
2024-06-03 00:32:50	26-35	Female	NCE/ND/TCII	SE	Imo	Onuimo	Okwelle 11	Yes	PDP	1-5 yrs	Yes	APC	Factionalization, Hijack of Party Structure	No		No		No		SA	SA	N	A	A	N	A	SA	A	D	N	N	D	D	SD	D	A	A	SD	D	A	N	N	A	N	N	A
2024-06-03 00:40:47	18-25	Male	WAEC/NECO	SE	Imo	Oguta	Obidi/Aro	Yes	PDP	1-5 yrs	No			No		No		No		SA	A	N	A	SA	D	A	SA	A	N	N	A	N	D	SD	D	A	A	D	D	A	D	D	A	N	N	A
2024-06-06 21:51:13	36-45	Female	HND/BSC/(FIRST DEGREE)	SW	Lagos	Ojo	Ajangbadi	Yes	PDP	6-10 yrs	No			Yes	State Executive	No		No		SA	SA	D	SA	SA	N	A	A	SA	SA	SD	A	A	N	D	SD	D	A	A	SD	SD	SA	A	A	A	N	A
2024-06-06 21:57:34	26-35	Female	HND/BSC/(FIRST DEGREE)	SW	Lagos	Ajeromi-Ifelodun	Wilmer	Yes	PDP	1-5 yrs	No			Yes	Ward Executive	No		No		SA	SA	SD	A	SA	N	D	A	A	SA	SD	A	A	SD	D	SD	D	A	A	SD	SD	A	N	N	A	N	A
2024-06-06 22:03:19	18-25	Female	NCE/ND/TCII	SW	Lagos	Surulere	Adeniran/Ogunsanya	Yes	PDP	1-5 yrs	No			No		No		No		SA	A	N	A	SA	N	D	N	A	SA	SD	A	A	N	N	SD	N	A	A	D	D	A	D	N	A	N	A
2024-06-06 22:10:18	36-45	Female	HND/BSC/(FIRST DEGREE)	SW	Lagos	Amuwo Odofin	Festac 111	Yes	PDP	1-5 yrs	Yes	APC	Non Inclusion in Decision-making, Imposition of Candidates	No		No		No		SA	SA	D	A	SA	N	A	A	SA	A	D	A	A	SD	D	SD	D	A	A	D	D	A	N	N	A	N	SA
2024-06-06 22:23:02	26-35	Female	HND/BSC/(FIRST DEGREE)	SW	Lagos	Eti-Osa	Ikoyi 11	Yes	PDP	6-10 yrs	No			Yes	Ward Executive	No		No		SA	SA	D	A	SA	N	A	A	SA	SA	D	A	A	D	D	SD	D	A	A	SD	SD	A	A	N	A	N	A
2024-06-07 14:57:48	26-35	Male	HND/BSC/(FIRST DEGREE)	SW	Lagos	Kosofe	Ojota/Ogudu	Yes	PDP	6-10 yrs	No			Yes	LG Executive	No		No		SA	SA	D	A	SA	N	N	A	SA	SA	D	A	A	SD	D	SD	D	A	A	SD	D	A	N	N	A	N	A
2024-06-07 15:04:32	46-55	Female	HND/BSC/(FIRST DEGREE)	SW	Lagos	Alimosho	Shasha/Akowonjo	Yes	PDP	6-10 yrs	No			Yes	State Executive	No		No		SA	SA	N	SA	SA	N	A	A	SA	SA	D	A	A	N	D	SD	D	A	A	D	D	A	A	A	SA	N	A
2024-06-07 15:13:34	26-35	Female	HND/BSC/(FIRST DEGREE)	SW	Lagos	Agege	Okekoto	Yes	PDP	1-5 yrs	No			Yes	Ward Executive	No		No		SA	A	SD	A	SA	N	N	A	SA	A	SD	A	A	SD	D	SD	D	A	A	SD	SD	SA	D	N	A	N	A
2024-06-07 15:28:36	46-55	Male	POSTGRADUATE	SW	Lagos	Ikeja	Ojodu/Agidingbi/Omole	Yes	PDP	11-15 yrs	No			No		No		No		SA	SA	A	A	SA	N	N	A	SA	SA	D	N	D	N	N	SD	D	A	A	A	SD	SA	A	N	A	N	A
2024-06-07 15:39:37	26-35	Female	NCE/ND/TCII	SW	Lagos	Ibeju Lekki	Lekki 1	Yes	PDP	1-5 yrs	No			No		No		No		SA	SA	N	A	SA	D	N	A	A	SA	D	A	A	SD	D	SD	D	A	A	D	SD	A	N	N	A	N	A
2024-06-07 15:45:42	26-35	Female	NCE/ND/TCII	SW	Lagos	Epe	Ejirin	Yes	PDP	1-5 yrs	No			Yes	Ward Executive	No		No		SA	SA	D	A	SA	N	N	A	SA	SA	SD	A	A	D	D	SD	D	N	A	SD	SD	A	N	N	A	N	A
2024-06-07 15:54:06	36-45	Female	HND/BSC/(FIRST DEGREE)	SW	Lagos	Ifako-Ijaye	Ijaiye/Ojokoro	Yes	PDP	6-10 yrs	Yes	APC	Imposition of Candidates	No		No		No		SA	SA	N	A	A	N	N	A	A	A	D	A	A	N	D	SD	D	A	D	SD	SD	A	A	A	A	N	A
2024-06-07 19:21:12	36-45	Male	WAEC/NECO	SW	Lagos	Somolu	Bajulaiye	Yes	PDP	6-10 yrs	No			No		No		No		SA	A	N	A	SA	N	N	A	SA	SA	N	A	A	N	D	SD	D	N	A	SD	D	SA	A	A	SA	A	A
2024-06-07 19:25:44	26-35	Female	FSLC	SW	Lagos	Oshodi/Isolo	Ilasamaja	Yes	PDP	1-5 yrs	Yes	APC	Imposition of Candidates	No		No		Yes	Boards	SA	A	N	A	SA	N	N	A	SA	A	D	A	A	D	N	N	N	A	A	D	D	A	N	N	A	N	A
2024-06-07 19:29:03	36-45	Female	WAEC/NECO	SW	Lagos	Lagos Mainland	Oko-Baba	Yes	PDP	6-10 yrs	No			Yes	LG Executive	No		No		SA	SA	D	A	SA	D	N	A	SA	SA	SD	A	A	D	D	SD	D	A	A	SD	D	SA	A	A	A	N	A
2024-06-07 19:32:29	18-25	Male	WAEC/NECO	SW	Lagos	Lagos Mainland	Alagomeji	Yes	PDP	1-5 yrs	No			No		No		No		SA	A	N	N	A	N	D	A	A	SA	N	A	A	N	N	N	N	A	A	D	D	A	D	N	A	N	A
2024-06-11 19:57:53	66 and above	Male	POSTGRADUATE	SS	Delta	Aniocha North	Idumueje-Unor	Yes	PDP	6-10 yrs	No			No		Yes	Senator	No		SA	SA	N	A	SA	A	SA	A	SA	SA	N	A	A	N	N	D	N	D	A	N	SD	SA	SA	SA	A	N	A
2024-06-11 20:20:23	46-55	Male	HND/BSC/(FIRST DEGREE)	SS	Delta	Ndokwa East	Aboh/Akarrai	Yes	PDP	11-15 yrs	No			No		Yes	MHR	Yes	Cabinet/Exco	SA	SA	A	A	SA	N	SA	A	SA	SA	D	A	N	N	N	N	N	D	A	D	D	SA	A	A	A	N	A
2024-06-11 21:07:45	36-45	Male	HND/BSC/(FIRST DEGREE)	SS	Delta	Ukwuani	Obiaruku	Yes	PDP	6-10 yrs	No			No		Yes	State Assembly	No		SA	SA	N	A	SA	N	SA	A	SA	SA	D	A	A	D	D	D	D	D	A	D	D	SA	A	A	A	N	A
2024-06-11 21:13:41	36-45	Female	POSTGRADUATE	SS	Delta	Ika North East	Akumazi	Yes	PDP	6-10 yrs	No			No		Yes	State Assembly	Yes	Adviser/Assistant	SA	SA	N	A	SA	N	A	A	SA	SA	D	A	N	D	D	D	D	D	A	D	SD	SA	A	A	A	N	A
2024-06-11 21:19:36	46-55	Female	POSTGRADUATE	SS	Delta	Oshimili North	Ibusa	Yes	PDP	16+ yrs	No			No		Yes	State Assembly	No		SA	SA	N	A	SA	N	A	A	SA	SA	D	A	N	D	D	SD	D	D	A	D	SD	A	A	A	A	N	A
2024-06-13 09:11:50	26-35	Female	NCE/ND/TCII	NW	Kaduna	Jema'a	Kagoma	Yes	PDP	6-10 yrs	No			Yes	LG Executive	No		No		SA	SA	D	A	SA	D	N	A	SA	SA	SD	A	A	D	D	SD	D	SA	A	SD	SD	SA	A	A	SA	N	SA
2024-06-13 09:18:23	36-45	Female	HND/BSC/(FIRST DEGREE)	NW	Kaduna	Ikara	Ikara	Yes	PDP	6-10 yrs	Yes	APC	Imposition of Candidates, Hijack of Party Structure	Yes	State Executive	Yes	Ward Councilor	No		SA	A	D	A	SA	D	A	A	SA	SA	SD	A	A	D	D	SD	D	A	A	SD	D	SA	A	A	SA	A	A
2024-06-13 09:25:13	26-35	Female	WAEC/NECO	NW	Kaduna	Jaba	Fada	Yes	PDP	1-5 yrs	No			No		No		No		SA	A	SD	A	SA	D	N	A	SA	SA	SD	A	A	N	SD	SD	SD	A	A	D	N	SA	A	N	A	N	A
2024-06-13 09:35:28	36-45	Male	HND/BSC/(FIRST DEGREE)	NW	Kaduna	Kaduna South	Sabon Gari South	Yes	PDP	6-10 yrs	Yes	APC	Imposition of Candidates, Hijack of Party Structure	No		No		No		SA	A	D	A	SA	D	N	A	SA	SA	SD	A	A	N	D	SD	D	A	A	SD	SD	SA	A	A	A	N	A
2024-06-13 09:41:51	26-35	Female	WAEC/NECO	NW	Kaduna	Kajuru	Kufana	Yes	PDP	1-5 yrs	No			Yes	Ward Executive	No		No		SA	A	SD	A	SA	D	D	A	SA	SA	SD	A	A	D	D	SD	D	A	A	SD	D	A	N	N	A	A	A
2024-06-13 09:51:01	56-65	Male	HND/BSC/(FIRST DEGREE)	NW	Kaduna	Kubau	Zabi	Yes	PDP	11-15 yrs	No			Yes	State Executive	No		Yes	Cabinet/Exco	SA	SA	D	A	SA	N	A	A	SA	SA	SD	A	A	D	D	SD	D	A	A	SD	D	SA	A	A	A	N	A
2024-06-13 09:58:57	26-35	Female	WAEC/NECO	NW	Kaduna	Makarfi	Tudun Wada	Yes	PDP	1-5 yrs	No			No		No		No		SA	A	SD	A	SA	N	N	A	SA	SA	SD	A	A	SD	D	SD	D	SA	A	SD	D	A	N	N	A	A	A
2024-06-13 10:13:12	46-55	Female	HND/BSC/(FIRST DEGREE)	NW	Kaduna	Kachia	Katari	Yes	PDP	6-10 yrs	No			No		No		No		SA	SA	D	A	SA	N	N	A	SA	SA	SD	A	A	N	D	SD	D	SA	A	SD	D	SA	A	A	SA	A	A
2024-06-13 10:20:09	46-55	Female	HND/BSC/(FIRST DEGREE)	NW	Kaduna	Kagarko	Kagarko South	Yes	PDP	11-15 yrs	No			Yes	State Executive	No		No		SA	SA	D	A	SA	N	A	A	SA	SA	SD	A	A	D	D	SD	D	A	A	SD	D	SA	A	A	SA	A	A
2024-06-13 10:31:18	26-35	Female	NCE/ND/TCII	NW	Kaduna	Kauru	Dawaki	Yes	PDP	1-5 yrs	No			No		No		No		SA	A	D	A	SA	N	N	A	SA	SA	SD	A	A	D	D	SD	D	A	A	SD	D	A	N	N	A	N	A
2024-06-13 10:36:52	18-25	Female	WAEC/NECO	NW	Kaduna	Kaura	Kaura	Yes	PDP	1-5 yrs	No			No		No		No		SA	A	D	A	SA	D	N	A	SA	SA	SD	A	A	SD	D	SD	D	SA	A	SD	D	SA	N	N	A	N	A
2024-06-13 18:29:53	26-35	Female	HND/BSC/(FIRST DEGREE)	NW	Kaduna	Kaduna North	Gaji	Yes	PDP	1-5 yrs	Yes	APC	Imposition of Candidates	No		No		No		SA	A	D	A	SA	N	N	A	SA	SA	SD	A	A	D	D	SD	D	SA	A	SD	D	A	N	N	A	A	A
2024-06-13 18:36:31	36-45	Male	WAEC/NECO	NW	Kaduna	Kudan	Zabi	Yes	PDP	6-10 yrs	No			Yes	LG Executive	No		No		SA	A	D	A	SA	N	N	A	SA	SA	SD	A	A	SD	D	SD	D	SA	A	SD	SD	SA	A	A	SA	A	A
2024-06-13 18:39:33	46-55	Female	WAEC/NECO	NW	Kaduna	Lere	Garu	Yes	PDP	6-10 yrs	No			Yes	LG Executive	No		No		SA	A	SD	A	SA	N	N	A	SA	A	D	A	A	N	D	D	D	A	A	SD	D	A	N	N	A	A	A
2024-06-13 18:44:03	18-25	Male	WAEC/NECO	NW	Kaduna	Soba	Gimba	Yes	PDP	1-5 yrs	No			No		No		No		SA	SA	D	A	SA	N	N	A	SA	SA	SD	A	A	D	D	SD	D	A	A	SD	D	A	N	N	A	N	A
2024-06-13 18:48:30	36-45	Female	NCE/ND/TCII	NW	Kaduna	Zomgon Kataef	Gora	Yes	PDP	1-5 yrs	Yes	APC	Imposition of Candidates	No		No		No		SA	A	D	A	SA	N	A	A	SA	SA	SD	A	A	D	D	D	D	A	A	SD	D	A	N	N	A	N	A
2024-06-13 18:58:56	26-35	Female	WAEC/NECO	NW	Kaduna	Zaria	Dambo	Yes	PDP	1-5 yrs	No			No		No		No		SA	SA	N	A	A	N	N	A	SA	SA	SD	A	A	N	D	SD	D	SA	A	SD	SD	SA	N	N	A	N	A
2024-06-13 19:08:14	26-35	Male	WAEC/NECO	NW	Kaduna	Sanga	Ayu	Yes	PDP	1-5 yrs	No			Yes	Ward Executive	No		No		SA	A	D	A	SA	N	N	A	SA	SA	SD	A	A	N	D	SD	D	A	A	SD	D	A	A	A	A	N	A
2024-06-13 19:16:24	36-45	Female	WAEC/NECO	NW	Kaduna	Sabon Gari	Bomo	Yes	PDP	6-10 yrs	No			Yes	LG Executive	No		No		SA	A	N	A	SA	N	N	A	SA	SA	SD	A	A	N	D	D		A	A	SD	D	A	N	N	A	A	A
2024-06-13 19:41:11	26-35	Female	WAEC/NECO	NW	Kaduna	Igabi	Igabi	Yes	PDP	1-5 yrs	No			Yes	Ward Executive	No		No		SA	A	D	A	SA	N	N	A	SA	SA	SD	A	A	SD	D	SD	D	SA	A	SD	D	SA	N	N	A	A	A
2024-06-13 19:52:31	26-35	Female	WAEC/NECO	NW	Kaduna	Giwa	Kadangi	Yes	PDP	1-5 yrs	No			No		No		No		SA	A	SD	A	SA	D	N	A	SA	SA	SD	A	A	SD	D	D	D	SA	A	SD	SD	SA	A	A	A	A	A
2024-06-13 19:56:19	26-35	Male	NCE/ND/TCII	NW	Kaduna	Giwa	Shika	Yes	PDP	1-5 yrs	No			Yes	Ward Executive	No		No		SA	A	D	A	SA	D	N	A	SA	SA	SD	A	A	SD	D	SD	D	SA	A	SD	D	SA	N	N	A	N	A
2024-06-22 19:30:30	56-65	Male	POSTGRADUATE	SS	Delta	Bomadi	Ogbeinama/Okoloba	Yes	PDP	16+ yrs	No			Yes	State Executive	Yes	Senator	Yes	Cabinet/Exco	SA	SA	D	A	SA	N	SA	A	SA	SA	D	A	A	N	N	D	N	D	A	D	D	SA	SA	SA	A	N	A
2024-06-22 20:05:26	56-65	Male	POSTGRADUATE	NC	Nasarawa	Akwanga	Akwanga west	Yes	PDP	16+ yrs	No			No		Yes	Senator	No		SA	SA	N	A	SA	N	SA	A	SA	SA	D	A	A	D	N	D	N	D	A	D	D	SA	SA	SA	A	A	A
2024-06-22 22:53:13	66 and above	Male	POSTGRADUATE	NE	Adamawa	Mayo-Belwa	Ribadu	Yes	PDP	11-15 yrs	No			Yes	State Executive	Yes	Senator	No		SA	SA	N	A	SA	N	SA	A	SA	SA	D	A	A	D	D	SD	N	D	A	D	D	A	SA	SA	A	N	A
2024-06-23 09:30:25	46-55	Male	POSTGRADUATE	NE	Adamawa	Hong	Uba	Yes	PDP	6-10 yrs	Yes	APC	Factionalization, Non Inclusion in Decision-making, Imposition of Candidates	No		Yes	Senator	No		SA	SA	N	A	SA	N	SA	A	SA	SA	D	A	A	N	N	D	N	D	A	D	D	SA	SA	SA	A	A	A
2024-06-23 10:39:13	56-65	Male	HND/BSC/(FIRST DEGREE)	SE	Imo	Ikeduru	Amaimo	Yes	PDP	16+ yrs	No			Yes	National Executive	Yes	Senator	Yes	Caretaker LGA Chairman	SA	SA	A	A	SA	N	SA	A	SA	SA	N	A	N	A	N	N	N	D	A	D	SD	SA	SA	SA	SA	A	A
2024-06-23 10:54:07	66 and above	Male	HND/BSC/(FIRST DEGREE)	SE	Imo	Isiala Mbano		Yes	PDP	6-10 yrs	Yes	APC	Non Inclusion in Decision-making, Imposition of Candidates	No		Yes	Senator	Yes	Boards	SA	SA	D	A	SA	N	SA	A	SA	SA	D	A	A	N	D	D	D	N	A	SD	D	SA	A	N	A	A	A
2024-06-23 14:11:58	56-65	Male	POSTGRADUATE	NW	Kaduna	Zangon Kataf	Madakiya	Yes	PDP	11-15 yrs	No			No		Yes	Senator	No		SA	SA	N	A	SA	N	SA	A	SA	SA	SD	A	A	N	D	SD	D	D	A	SD	SD	SA	SA	SA	A	A	A
2024-06-23 14:18:33	66 and above	Male	POSTGRADUATE	NW	Kaduna	Markafi	Markafi	Yes	PDP	16+ yrs	No			Yes	National Executive	Yes	Senator	Yes	Cabinet/Exco	SA	SA	A	A	A	N	SA	A	SA	SA	SD	A	A	A	N	N	N	D	A	SD	SD	SA	SA	SA	SA	A	A
2024-06-24 12:23:30	56-65	Male	HND/BSC/(FIRST DEGREE)	SS	Delta	Bomadi	Bomadi 1	Yes	PDP	16+ yrs	No			No		Yes	MHR	No		SA	SA	N	A	SA	N	SA	A	SA	SA	D	A	A	N	D	SD	D	SD	A	SD	D	SA	SA	SA	A	A	A
2024-06-24 12:26:55	36-45	Female	HND/BSC/(FIRST DEGREE)	SS	Delta	Ethiope West	Oghara	Yes	PDP	6-10 yrs	No			No		Yes	MHR	Yes	Adviser/Assistant	SA	SA	D	A	SA	N	SA	A	SA	SA	SD	A	A	D	D	SD	D	N	A	SD	D	SA	A	A	A	N	A
2024-06-24 13:04:50	56-65	Male	HND/BSC/(FIRST DEGREE)	NE	Adamawa	Numan	Mburu	Yes	PDP	11-15 yrs	No			Yes	State Executive	Yes	MHR	Yes	Cabinet/Exco	SA	SA	N	A	SA	N	SA	A	SA	SA	SD	A	A	N	D	SD	D	D	A	SD	D	SA	SA	SA	A	A	A
2024-06-24 13:23:50	56-65	Male	HND/BSC/(FIRST DEGREE)	NE	Adamawa	Jada	Mayokalaye	Yes	PDP	11-15 yrs	No			Yes	State Executive	Yes	MHR	Yes	Cabinet/Exco	SA	SA	N	A	SA	N	SA	A	SA	SA	SD	A	A	D	D	SD	D	D	A	SD	D	SA	A	A	A	A	A
2024-06-24 13:38:40	26-35	Male	HND/BSC/(FIRST DEGREE)	SE	Imo	Ideato North	Umuokwara	Yes	PDP	1-5 yrs	No			No		Yes	MHR	Yes	Adviser/Assistant	SA	SA	D	A	SA	N	SA	A	SA	SA	SD	A	A	D	D	SD	D	N	A	SD	D	SA	A	A	A	A	A
2024-06-24 13:42:25	56-65	Male	HND/BSC/(FIRST DEGREE)	SE	Imo	Aboh Mbaise	Mbutu	Yes	PDP	16+ yrs	No			No		Yes	MHR	Yes	Adviser/Assistant	SA	SA	D	A	A	D	SA	A	SA	SA	SD	A	A	D	D	SD	D	D	A	SD	D	SA	SA	SA	A	A	A
2024-06-25 13:39:40	46-55	Male	POSTGRADUATE	NW	Kaduna	Sabon Gari	Dogorawa	Yes	PDP	6-10 yrs	No			No		Yes	MHR	Yes	Boards	SA	SA	D	A	SA	D	SA	A	SA	SA	SD	A	A	D	D	SD	D	N	A	SD	D	SA	A	A	A	A	A
2024-06-25 13:46:43	56-65	Male	POSTGRADUATE	NW	Kaduna	Jaba	Fada	Yes	PDP	16+ yrs	No			No		Yes	MHR	Yes	Adviser/Assistant	SA	SA	D	A	SA	D	SA	A	SA	SA	SD	A	A	D	D	SD	D	D	A	SD	D	SA	SA	SA	A	A	A
2024-06-26 10:46:59	46-55	Male	HND/BSC/(FIRST DEGREE)	SW	Lagos	Ojo	Ojo	Yes	PDP	11-15 yrs	No			No		Yes	MHR	No		SA	SA	D	A	SA	D	SA	A	SA	SA	SD	A	A	D	D	SD	D	D	A	SD	SD	SA	SA	SA	SA	A	A
2024-06-26 11:01:22	66 and above	Male	HND/BSC/(FIRST DEGREE)	SW	Lagos	Amuwo Odofin	Festac	Yes	PDP	6-10 yrs	No			No		Yes	MHR	No		SA	SA	D	A	A	D	SA	A	SA	SA	SD	A	A	D	D	SD	D	D	A	SD	D	SA	SA	SA	SA	A	A
2024-06-30 13:48:56	46-55	Male	HND/BSC/(FIRST DEGREE)	NW	Kaduna	Jema'a	Kagoma	Yes	PDP	1-5 yrs	Yes	APC	Non Inclusion in Decision-making, Imposition of Candidates	No		Yes	State Assembly	No		SA	SA	D	A	SA	N	A	A	SA	SA	SD	A	A	D	D	SD	D	N	A	SD	D	SA	SA	SA	A	A	A
2024-06-30 13:51:57	46-55	Male	NCE/ND/TCII	NW	Kaduna	Kachia	Doka	Yes	PDP	6-10 yrs	No			Yes	LG Executive	Yes	State Assembly	No		SA	SA	D	A	SA	N	A	A	SA	SA	SD	A	A	D	D	SD	D	D	A	SD	D	SA	SA	SA	A	A	A
2024-06-30 14:18:53	26-35	Male	HND/BSC/(FIRST DEGREE)	NW	Kaduna	Markafi	Markafi	Yes	PDP	1-5 yrs	No			Yes	National Executive	No		No		SA	SA	N	A	SA	N	SA	A	SA	SA	N	A	N	N	N	N	N	D	A	N	D	SA	SA	SA	SA	A	A
2024-06-30 14:22:10	46-55	Male	HND/BSC/(FIRST DEGREE)	NW	Kaduna	Kajuru	Kajuru	Yes	PDP	6-10 yrs	No			Yes	LG Executive	Yes	State Assembly	No		SA	SA	D	SA	SA	N	SA	A	SA	SA	SD	A	A	D	D	SD	D	D	A	SD	D	SA	SA	SA	SA	A	A
2024-06-30 18:52:02	36-45	Male	HND/BSC/(FIRST DEGREE)	NC	Nasarawa	Karu	Aso/Kodape	Yes	PDP	6-10 yrs	No			Yes	State Executive	Yes	State Assembly	No		SA	SA	D	A	SA	D	SA	A	SA	SA	SD	A	A	D	D	SD	D	D	A	SD	D	SA	A	A	A	N	A
2024-06-30 18:54:43	36-45	Male	HND/BSC/(FIRST DEGREE)	NC	Nasarawa	Lafia	Assakio	Yes	PDP	6-10 yrs	Yes	APC	Imposition of Candidates, Hijack of Party Structure	No		Yes	State Assembly	No		SA	SA	D	A	SA	D	SA	A	SA	SA	SD	A	A	D	D	SD	D	A	A	SD	D	SA	A	A	SA	A	A
2024-06-30 19:25:11	36-45	Female	HND/BSC/(FIRST DEGREE)	NE	Adamawa	Demsa	Dong	Yes	PDP	6-10 yrs	No			Yes	LG Executive	Yes	State Assembly	Yes	Adviser/Assistant	SA	SA	D	SA	SA	D	SA	A	SA	SA	D	A	A	SD	D	SD	D	N	A	SD	D	SA	SA	SA	SA	A	A
2024-06-30 19:27:52	36-45	Male	NCE/ND/TCII	NE	Adamawa	Jada	Mbulo	Yes	PDP	6-10 yrs	No			No		Yes	State Assembly	No		SA	SA	N	A	A	N	SA	A	SA	SA	SD	N	N	SD	D	SD	D	N	A	SD	D	SA	SA	SA	SA	A	A
2024-06-30 19:38:37	46-55	Male	HND/BSC/(FIRST DEGREE)	NE	Adamawa	Hong	Daksiri	Yes	PDP	11-15 yrs	No			Yes	National Executive	No		Yes	Cabinet/Exco	SA	SA	A	A	A	N	SA	A	SA	SA	N	N	N	A	A	N	N	N	A	D	D	SA	SA	SA	SA	A	SA
2024-07-01 13:08:44	66 and above	Male	HND/BSC/(FIRST DEGREE)	SS	Delta	Isoko North	Ellu	Yes	PDP	16+ yrs	No			Yes	National Executive	No		No		SA	SA	D	A	SA	N	SA	A	SA	SA	D	N	N	A	N	N	N	D	A	D	D	SA	SA	SA	SA	A	A
2024-07-01 13:13:24	56-65	Male	POSTGRADUATE	SS	Delta	Aniocha South	Ogwashi Uku	Yes	PDP	16+ yrs	No			Yes	Zonal Executive	Yes	MHR	Yes	Adviser/Assistant	SA	SA	D	A	SA	D	SA	A	SA	SA	SD	A	A	D	D	SD	D	D	A	SD	SD	SA	SA	SA	SA	A	A
2024-07-07 17:28:40	46-55	Female	HND/BSC/(FIRST DEGREE)	SE	Imo	Isu	Ekwe	Yes	PDP	11-15 yrs	No			No		Yes	State Assembly	Yes	Adviser/Assistant	SA	SA	D	A	SA	D	SA	A	SA	SA	SD	A	A	D	D	SD	D	N	A	SD	D	SA	SA	SA	SA	A	A
2024-07-08 16:39:17	46-55	Male	POSTGRADUATE	SE	Imo	Aboh Mbaise	Uvuru	Yes	PDP	11-15 yrs	No			Yes	State Executive	Yes	State Assembly	Yes	Adviser/Assistant	SA	SA	D	A	SA	D	A	A	SA	SA	SD	A	N	N	SD	SD	SD	N	A	SD	SD	SA	SA	SA	A	A	A
2024-07-08 16:44:36	46-55	Male	HND/BSC/(FIRST DEGREE)	SE	Imo	Ideato South	Isiekenesi 1	Yes	PDP	11-15 yrs	No			No		Yes	State Assembly	No		SA	SA	D	A	SA	D	A	A	SA	SA	SD	N	N	D	SD	D	SD	N	A	SD	SD	SA	SA	A	SA	A	A
																																															Are there significant differences in the relationships between decentralized party organization and inclusive local participation in decision making in your Party?
																																						How does the level of decentralization of party structures enhance their ideologies in Nigeria ?
[truncated: 3 more columns]

## Sheet: Sheet4
Timestamp	1.Select Your Age bracket	2.Gender	3.Educational Attainment	4.Geopolitical Zone	5.State of Origin	6.Local Government Origin	7.Electoral Ward	8.Are you a member of a political party?	9.What is your party affiliation?	10. For how long have you been a member the party?	11. Have you ever changed your party membership?	12. If your answer to question 11 above is yes, please state the political party you changed from	13.Why did you change/defect?	14.Are you holding any party position currently or held any party position before: :	15.What was/is your position in the party (Note: If answer to the previous question is NO please ignore)	16.Have you been elected into any public office/position?	17.What is the position? (Note: If answer to the previous question is NO please ignore)	18.As a party man, have you ever been appointed to a public position?	19.What is/was the position?	How does decentralized organizational structure impact on the membership stability of your Party? Where: Strongly Agree (SA), Agree (A), Neutral (N), Disagree (D) and Strongly Disagree (SD) [1. My party has structures at the national, zonal, state, local and ward levels]	How does decentralized organizational structure impact on the membership stability of your Party? Where: Strongly Agree (SA), Agree (A), Neutral (N), Disagree (D) and Strongly Disagree (SD) [2. In my party, power is distributed among national, state and local party Branches.]	How does decentralized organizational structure impact on the membership stability of your Party? Where: Strongly Agree (SA), Agree (A), Neutral (N), Disagree (D) and Strongly Disagree (SD) [3. The Chapters/Branches effectively perform responsibilities assigned to them by the party constitution]	How does decentralized organizational structure impact on the membership stability of your Party? Where: Strongly Agree (SA), Agree (A), Neutral (N), Disagree (D) and Strongly Disagree (SD) [4. Decentralized organizational structure could positively influence the recruitment and retention of members in a party]	How does decentralized organizational structure impact on the membership stability of your Party? Where: Strongly Agree (SA), Agree (A), Neutral (N), Disagree (D) and Strongly Disagree (SD) [ 5. Commitment of party members is enhanced when they participate in decision-making process of the party]	How does decentralized organizational structure impact on the membership stability of your Party? Where: Strongly Agree (SA), Agree (A), Neutral (N), Disagree (D) and Strongly Disagree (SD) [6. My party allows individual members opinion in reaching decisions]	How does decentralized organizational structure impact on the membership stability of your Party? Where: Strongly Agree (SA), Agree (A), Neutral (N), Disagree (D) and Strongly Disagree (SD) [7. I have always paid my monthly dues.]	How does decentralized organizational structure impact on the membership stability of your Party? Where: Strongly Agree (SA), Agree (A), Neutral (N), Disagree (D) and Strongly Disagree (SD) [8 . Party leaders sometimes pay dues for members]	How does decentralized organizational structure impact on the membership stability of your Party? Where: Strongly Agree (SA), Agree (A), Neutral (N), Disagree (D) and Strongly Disagree (SD) [9. Infact, party leaders finance the party activities and programmes]	How does decentralized organizational structure impact on the membership stability of your Party? Where: Strongly Agree (SA), Agree (A), Neutral (N), Disagree (D) and Strongly Disagree (SD) [10. Not taking part in decision making affects the sense of party ownership and commitment among members]	How does decentralized organizational structure impact on the membership stability of your Party? Where: Strongly Agree (SA), Agree (A), Neutral (N), Disagree (D) and Strongly Disagree (SD) [11. The centralized pattern of decision making in the party positively affects party membership stability]	How does decentralized organizational structure impact on the membership stability of your Party? Where: Strongly Agree (SA), Agree (A), Neutral (N), Disagree (D) and Strongly Disagree (SD) [12.Granting of more autonomy to local party chapters/branches could positively impact in their ability to retain members and foster loyalty]	Are there significant differences in the relationships between decentralized party organization and inclusive local participation in decision making in your Party? Where: Strongly Agree (SA), Agree (A), Neutral (N), Disagree (D) and Strongly Disagree (SD) [1. Strong national party leadership’s control hinders the level of local autonomy in decision-making processes of our party]	Are there significant differences in the relationships between decentralized party organization and inclusive local participation in decision making in your Party? Where: Strongly Agree (SA), Agree (A), Neutral (N), Disagree (D) and Strongly Disagree (SD) [2. All Chapters/Branches of our party have reliable sources of funding]	Are there significant differences in the relationships between decentralized party organization and inclusive local participation in decision making in your Party? Where: Strongly Agree (SA), Agree (A), Neutral (N), Disagree (D) and Strongly Disagree (SD) [3. The nature of power distribution amongst our party Chapters/Branches ensures the inclusion of diverse local viewpoints in decision-making]	Are there significant differences in the relationships between decentralized party organization and inclusive local participation in decision making in your Party? Where: Strongly Agree (SA), Agree (A), Neutral (N), Disagree (D) and Strongly Disagree (SD) [4. The pattern of decision made at the Chapters/Branches of our party influences national party decision]	Are there significant differences in the relationships between decentralized party organization and inclusive local participation in decision making in your Party? Where: Strongly Agree (SA), Agree (A), Neutral (N), Disagree (D) and Strongly Disagree (SD) [5. The current structure of my party encourages members from diverse background to participate in decision making process]	Are there significant differences in the relationships between decentralized party organization and inclusive local participation in decision making in your Party? Where: Strongly Agree (SA), Agree (A), Neutral (N), Disagree (D) and Strongly Disagree (SD) [6. The conduct of party primaries by national leadership of our party discourages accountability of elected representatives to their local bra…	Are there significant differences in the relationships between decentralized party organization and inclusive local participation in decision making in your Party? Where: Strongly Agree (SA), Agree (A), Neutral (N), Disagree (D) and Strongly Disagree (SD) [7. Consideration of diverse viewpoints from Chapters/Branches could enhance greater participation in decision-making in a party]	Are there significant differences in the relationships between decentralized party organization and inclusive local participation in decision making in your Party? Where: Strongly Agree (SA), Agree (A), Neutral (N), Disagree (D) and Strongly Disagree (SD) [8. Strong national party leadership’s control of Chapters/Branches enhances greater members participation in party affairs]	Are there significant differences in the relationships between decentralized party organization and inclusive local participation in decision making in your Party? Where: Strongly Agree (SA), Agree (A), Neutral (N), Disagree (D) and Strongly Disagree (SD) [9. My party (from Ward to zonal levels) organizes congresses and primaries at various levels, without interference from the national leadershi…	How does the level of decentralization of party structures enhance their ideologies in Nigeria ? Where: Strongly Agree (SA), Agree (A), Neutral (N), Disagree (D) and Strongly Disagree (SD) [1. My party has a training institute where its policies and programs are developed]	How does the level of decentralization of party structures enhance their ideologies in Nigeria ? Where: Strongly Agree (SA), Agree (A), Neutral (N), Disagree (D) and Strongly Disagree (SD) [2. I know my parties ideologies policies and programs]	How does the level of decentralization of party structures enhance their ideologies in Nigeria ? Where: Strongly Agree (SA), Agree (A), Neutral (N), Disagree (D) and Strongly Disagree (SD) [3. I believe in the ideologies and work to achieve the policies and programs of my party. ]	How does the level of decentralization of party structures enhance their ideologies in Nigeria ? Where: Strongly Agree (SA), Agree (A), Neutral (N), Disagree (D) and Strongly Disagree (SD) [4. National ,zonal and state leaders are trained at the institute]	How does the level of decentralization of party structures enhance their ideologies in Nigeria ? Where: Strongly Agree (SA), Agree (A), Neutral (N), Disagree (D) and Strongly Disagree (SD) [5. Party Chapter/Branches train and inculcate in members its policies and programs.]	How does the level of decentralization of party structures enhance their ideologies in Nigeria ? Where: Strongly Agree (SA), Agree (A), Neutral (N), Disagree (D) and Strongly Disagree (SD) [6. Effective distribution of power among party chapters and branches promotes understanding of party ideologies, policies and programs]
2024-04-28 20:23:52	56-65	Male	HND/BSC/(FIRST DEGREE)	SW	Lagos	Lagos Island	D2	Yes	PDP	16+ yrs	No	None		No		No		Yes	Boards	SA	SA	A	A	SA	A	SA	SA	A	A	SA	SA	A	A	A	A	SA	SA	SA	A	N	SA	SA	SA	SA
2024-04-30 05:06:14	36-45	Male	HND/BSC/(FIRST DEGREE)	NC	Nasarawa	Keana	MADAKI	Yes	PDP	16+ yrs	No			Yes	LG Executive	Yes	Ward Councilor	Yes	Adviser/Assistant	SA	SA	SA	A	SA	SD	A	A	SA	SD	SA	SD	SD	SD	D	D	D	SD	SD	D	SA	SA	SA	A	SA	SA	SA
2024-04-30 13:25:47	36-45	Male	HND/BSC/(FIRST DEGREE)	NC	Nasarawa	Lafia	Lafia	Yes	PDP	16+ yrs	No	PDP		No		No		No		SA	SA	SA	SA	SA	SA	SA	SA	A	A	SA	SA	SA	SA	SA	SA	D	SA	SA	SA	SA	SA	SA	A	A	SA	SA
2024-04-30 14:56:30	46-55	Female	POSTGRADUATE	NW	Kaduna	Kaduna South	Barnawa 1	Yes	PDP	16+ yrs	No			Yes	National Executive	No		No		SA	SA	A	A	SA	SA	SA	A	SA	A	A	SA	D	N	D	N	A	A	A	SA	A	A	A	N	N	N	SA
2024-04-30 17:34:34	56-65		POSTGRADUATE	NC	Plateau	Jos North	Naraguta A	Yes	PDP	16+ yrs	No			No				Yes	Adviser/Assistant	SA	SA	SA	A	SA	N	N	A	SA	A	A	SA	N	A	N	N	SA	A	N	SA	SA	A	A	A	N	A	A
2024-05-01 08:32:43	56-65	Male	HND/BSC/(FIRST DEGREE)	SS	Delta	Patani	one	Yes	PDP	6-10 yrs		APC	Factionalization	Yes	Ward Executive	No		Yes	Adviser/Assistant	D	SA	SA	A	A	D	A	SA	SA	SA	D	A	D	A	D	A	SA	A	SA	D	SD	D	D	SD	SD	D	N
2024-05-01 13:18:14	46-55	Male	HND/BSC/(FIRST DEGREE)	NW	Kaduna	Jema'a	Kagoma	Yes	PDP	16+ yrs	No			No		No		Yes	Adviser/Assistant	SA	A	A	SA	A	N	N	N	A	A	A	N	D	A	N	N	A	A	N	D	D	N	N	D	N	N	SA
2024-05-01 19:53:58	66 and above	Male	POSTGRADUATE	SW	Lagos	Lagos Mainland	Ward K.	Yes	PDP	16+ yrs	Yes	APC		No		No		No		SA	A	A	SA	SA	N	SA	SA	SA	SD	SA	SA	SD	A	D	D	SA	SA	SD	SA	SA	SA	SA	SA	A	D	SA
2024-05-02 18:40:30	56-65	Male	POSTGRADUATE	NW	Kaduna	Zaria LG	Kwarbai A	Yes	PDP	16+ yrs	Yes	Labour Party	Hijack of Party Structure	Yes	National Executive	No		Yes	Adviser/Assistant	SD	D	D	D	SA	D	SA	SA	A	N	SA	SA	D	N	N	N	N	SA	N	N	D	N	D	D	A	N	SA
2024-05-03 13:10:48	36-45	Male	POSTGRADUATE	NC	Nasarawa	KEANA	IWAGU	Yes	PDP	16+ yrs	No			No		No				SA	SA	SA	SA	SA	SA	SA	SA	SA	A	SA	SA	SA	SA	SA	SA	A	A	SA	SA	SA	SA	SA	A	SA	SA	SA
2024-05-03 14:04:18	46-55	Male	HND/BSC/(FIRST DEGREE)	NC	Nasarawa	Doma LGA	Galadima Ward	Yes	PDP	16+ yrs	No			Yes	LG Executive	No		No		SA	SA	SA	SA	SA	SA	A	SA	SA	A	SA	SA	D	A	SA	SA	D	A	D	A	A	SA	SA	A	N	A	A
2024-05-03 14:14:31	36-45	Male	HND/BSC/(FIRST DEGREE)	NC	Nasarawa	Keana local government	Obene Ward	Yes	PDP	16+ yrs	No			Yes	Ward Executive					SA	SA	SA		SA	SA	A	A	A	A	SA	A	A	SA	SA	A	A	SA	SA	SA	A	SA	SA	A	A	SA	SA
2024-05-03 14:37:40	56-65	Male	HND/BSC/(FIRST DEGREE)	NC	Nasarawa	Awe	Tunga	Yes	PDP	16+ yrs	No			Yes	State Executive	No		No		SA	SA	SA	A	SA	SA	A	SA	SA	SA	SA	SA	SA	SA	SA	SA	SA	SA	SA	SA	SA	SA	SA	A	A	SA	SA
2024-05-03 15:07:34	36-45	Male	WAEC/NECO	NC	Nasarawa	Toto	Ugya	Yes	PDP	16+ yrs	No			No		No		No
2024-05-03 15:46:39	46-55	Male	POSTGRADUATE	NC	Nasarawa	Doma	Agbashi	Yes	PDP	6-10 yrs	Yes	APGA	Imposition of Candidates	No		No		No		SA	SA	SA	A	SA	SA	A	A	SA	A	A	A	N	A	SA	SA	SD	SA	SA	A	N	A	A	N	A	A	SA
2024-05-04 00:21:53	56-65	Female	POSTGRADUATE	NW	Kaduna	SANGA	NINZO NORTH WARD	Yes	PDP	16+ yrs	Yes		Imposition of Candidates	Yes	State Executive	Yes	State Assembly	Yes	Cabinet/Exco		A	A	A	SA	A	N	N	A	A		SA	SA	A	A	SA	A	N	N	A	N	A	A	N	N	A	A
2024-05-04 11:39:21	46-55	Male	POSTGRADUATE	SS	Delta	Ndokwa West	Ward 3	Yes	PDP	16+ yrs	No			Yes	State Executive	No		Yes	Adviser/Assistant	SA	SA	SA	SA	A	SA	N	N	N	D	A	N	SA	A	A	A	SD	SD	D	D	SA	SA	SA	A	A	A	A
2024-05-05 07:47:34	46-55	Male	POSTGRADUATE	SE	Imo	Aboh Mbaise	Uvuru 1	Yes	PDP	16+ yrs	Yes	Anpp	Hijack of Party Structure	Yes	State Executive	No		Yes	Adviser/Assistant	A	A	D	D	A	D	A	A	A	D	D	D	D	D	A	D	D	D	D	D	D	A	A	N	D	D	D
2024-05-05 10:37:22	56-65	Male	WAEC/NECO	NC	Nasarawa	Keana	Kwara	Yes	PDP	16+ yrs	No	PDP		Yes	Ward Executive	No		Yes	Cabinet/Exco	SA	SA	SA	SA	SA	SA	SA	SA	SA	SA	SA	SA	SA	SA	SA	SA	SA	SA	SA	SA	SA	SA	SA	SA	SA	SA	SA
2024-05-06 10:12:46	36-45	Male	POSTGRADUATE	NC	Nasarawa	Wamba	Wayo	Yes	PDP	11-15 yrs	No			No		No		No		SA	SA	SA	SA	SA	N	N	N	A	N	N	D	D	N	A	N	D	N	N	D	SD	A	SA	SD	SD	N	N
2024-05-06 18:05:46	36-45	Male	POSTGRADUATE	NC	Nasarawa	Keana	Kadarko	Yes	PDP	11-15 yrs	No			Yes	Ward Executive	No		Yes	Cabinet/Exco	SA	SA	A	SA	SA	A	A	A	A	SA	SA	SA	A	A	SA	SA	A	SA	SA	A	D	SA	SA	D	SD	SA	SA
2024-05-06 18:07:22	46-55	Male	POSTGRADUATE	NC	Nasarawa	Keana	Giza Galadima	Yes	PDP	16+ yrs	No			Yes	Zonal Executive	No		No		SA	A	SA	SA	SA	SA	SA	SA	SA	SD	SA	SA	SA	SA	A	A	SA	A	A	SA	N	N	A	N	N	SA	A
2024-05-06 19:26:23	46-55	Female	HND/BSC/(FIRST DEGREE)	NC	Nasarawa	Doma	Galadima ward Doma	Yes	PDP	16+ yrs	No			Yes	State Executive	Yes	Ward Councilor	No		SA	SA	SA	SA	SA	SA	A	A	A	SA	SA	A	A	SA	A	A		SA	SA	SA	A	A	A	N	A	SA	A
2024-05-06 19:59:47	46-55	Male	HND/BSC/(FIRST DEGREE)	NC	Nasarawa	Akwanga	Andaha	Yes	PDP	16+ yrs	No			Yes	LG Executive	No		No		SA	SA	SA	SA	SA	A	SA	A	A	A	SA	A	A	A	A	SA	A	SA		SA	A	SA	SA	N	SA	SA	SA
2024-05-06 21:15:23	46-55	Male	HND/BSC/(FIRST DEGREE)	NC	Nasarawa	Obi	Kyakale	Yes	PDP	16+ yrs	No			Yes	LG Executive	No		No		SA	SA	SA	SA	SA	A	SA	A	SA	SA	SA	SA	D	N	A	N	SA	D	SD	A	A	SA	SA	A	SA	SA	SA
2024-05-07 07:01:03	26-35	Male	HND/BSC/(FIRST DEGREE)	NC	Nasarawa	Keana LGA	Kadarko	Yes	PDP	16+ yrs	No			Yes	State Executive	No		No		A	SA	SA	A	SA	SA	SA	SA	SA	SA	SA	SA	A	SA	SA	A	SA	A	SA	SA	A	SA	SA	A	A	A	SA
2024-05-07 08:54:57	46-55	Male	HND/BSC/(FIRST DEGREE)	NC	Nasarawa	Toto	Shafa kwotto	Yes	PDP	16+ yrs	No	PDP		Yes	LG Executive	No		Yes	Adviser/Assistant	SA	SA	SA	SA	SA	SA	SA	A	SA	SA	SA	SA	SA	SA	SA	SA	SA	SA	SA	SA	SA	SA	SA	SA	SA	SA	SA
2024-05-07 14:59:29	36-45	Male	HND/BSC/(FIRST DEGREE)	NC	Nasarawa	Lafia	Assakio	Yes	PDP	16+ yrs	No			No		Yes	State Assembly			SA	SA	SA	A	A	A	SA	SA	A	SA	SA	A	A	A	A	A	A	A	A	SA	SA	SA	A	SA	A	A	A
2024-05-07 17:06:14	66 and above	Male	NCE/ND/TCII	NW	Nasarawa	KEANA	Madaki	Yes	PDP	16+ yrs	No			Yes	LG Executive	Yes	Ward Councilor	No		SA	SA	SA	A	SA	A		A	A	A	A					SA	A	A		A		SA	SA			A	SA
2024-05-07 18:22:57	36-45	Male	HND/BSC/(FIRST DEGREE)	NC	Nasarawa	Lafia	Assakio	Yes	PDP	16+ yrs	No			Yes	Ward Executive	No		Yes		SA	SA	SA	SA	SA	SA	SA	SA	SA	SA	SA	SA	SA	SA	SA	SA	SA	SA	SA	SA	SA	SA	SA	SA	SA	SA	SA
2024-05-07 18:26:26	36-45	Male	HND/BSC/(FIRST DEGREE)	NC	Nasarawa	Obi	Agwatashi	Yes	PDP	16+ yrs	No			No		No		No		SA	SA	SA	SA	SA	SA	A	SA	SA	SA	SA	SA	SA	SA	A	SA	A		SA	A	SA	N	SA	A	SA	SA	SA
2024-05-09 10:21:18	46-55	Male	HND/BSC/(FIRST DEGREE)	NE	Adamawa	Hong	Bangshika	Yes	PDP	16+ yrs	No			Yes	State Executive	No		Yes	Adviser/Assistant	SA	A	N	A	A	A	N	A	SA	A	A	A	N	SA	N	SA	A	N	D	SA	N	A	SA	N	D	A	N
2024-05-09 14:55:09					Adamawa	Jada	Jada 1	Yes	PDP	16+ yrs	No			Yes	State Executive	No		Yes	Cabinet/Exco	SA	SA	SA	SA	SA	SA	SA	SA	SA	SA	SA	A	A	A	A	SA	A	SA	SA	SA	A	A	A	A	A	SA	A
2024-05-09 16:05:59	36-45	Female	POSTGRADUATE	SS	Delta	UDU	Ward 4	Yes	PDP	11-15 yrs	No			Yes	State Executive	No		Yes	Special Assistant, senior special Assistant	SA	SA	SA	A	SA	A	A	SA	A	A	A	SA	A	A	A	A	A	A	A	A	N	A	A	N	A	A	A
2024-05-11 21:34:38	36-45	Male	HND/BSC/(FIRST DEGREE)	NE	Adamawa	Song	Dirma	Yes	PDP	16+ yrs	Yes	ACN	Imposition of Candidates	No		No		Yes	SSA	SA	SA	SA	A	SA		N	A	SA	SA	A	A	A	SA	A	A	N	SA	SA	A	SA	SA	SA	A	A	A	SA
2024-05-12 14:11:04	46-55	Male	POSTGRADUATE	SW	Lagos	Oshodi Isolo	Mafoluku Ward	Yes	PDP	16+ yrs	Yes	AD Alliance For Democracy	Hijack of Party Structure	Yes	LG Executive	Yes	State Assembly	Yes	National Delegate	SA	D	SD	A	D	N	N	A	SA	A	D	SA	SD	SD	SA	D	D	D	SA	SD	SA	A	A	N	N	SD	SA
2024-05-12 17:12:55	36-45	Male	HND/BSC/(FIRST DEGREE)	SW	Lagos	Oshodi	Ewu ward	Yes	PDP	11-15 yrs	No			No		No		No		SA	SA	SA	SA	SA	SA	A	SA	SA	SA	SA	SA	A	SA	SA	SA	A	SA	A	SA	A	SA	SA	A	A	SA	SA
2024-05-12 17:17:12	56-65	Male	POSTGRADUATE	SW	Lagos	Lagos Island	Ward F2, Ilasamaja	Yes	PDP	11-15 yrs	Yes	APC	Imposition of Candidates	No		No		Yes	National Campaign council	SA	SA	SA	SA	SA	SA	A	SA	SA	SA	SA	SD	SA	SA	A	A	SA	A	SA	SD	SA	SA	SA	SD	A	A	SA
2024-05-12 17:45:59	46-55	Male	HND/BSC/(FIRST DEGREE)	SW	Lagos	Ojo	Yaba/Ojuelegba in Surulere, Lagos	Yes	PDP	16+ yrs	No			Yes	State Executive	No		No		SA	SA	SD	SA	SA	D	SA	SA	N	D	SA	SA	SD	SA	A	SD	SA	SD	SA	SA	SA	SA	SA	SA	SA	SD	SA
2024-05-12 21:51:28	46-55	Male	NCE/ND/TCII	NE	Adamawa	Mubi south	Gella ward	Yes	PDP	16+ yrs	No			Yes	Zonal Executive	Yes	Ward Councilor	Yes	Adviser/Assistant	SA	SA	SA	SA	SA	SA	SA	SA	A	SA	SA	SA	SA	SA	SA	SA	SA	SA	SA	A	SA	SA	SA	A	A	SA	SA
2024-05-12 23:53:58	46-55	Male	HND/BSC/(FIRST DEGREE)	SE	Enugu	Awgu	C	Yes	PDP	16+ yrs	No			Yes	State Executive	Yes	Ward Councilor	No		SA	A	A	SA	SA	D	D	D	SD	D	SA	A	N	N	N	A	SA	A	N	N	N	D	D	N	A	D	SA
2024-05-13 05:57:49	46-55	Male	HND/BSC/(FIRST DEGREE)	NE	Adamawa	Girei	Girei 1	Yes	PDP	16+ yrs	Yes	AC/ACN	Hijack of Party Structure	No		No		No		SA	SA	SA	SA	SA	SA	A	SA	SA	SA	SA	SA	A	A	A	SA	SA	A	SA	A	SA	A	A	A	A	A	SA
2024-05-13 06:42:21	46-55	Male	HND/BSC/(FIRST DEGREE)	NC	Adamawa	Toungo	Toungo 1	Yes	PDP	16+ yrs	No			No		Yes	State Assembly			SA	SA	SA	SA	SA	SA		SA	SA		SA	SA	SA	SA	SA	SA	SA	SA	A	A	SA	SA	SA	SA	A	SA	A
2024-05-13 14:09:40	56-65	Male	POSTGRADUATE	SW	Lagos	Epe	J1	Yes	PDP	16+ yrs	No			Yes	State Executive	No		Yes	Lagos East coordinator for Sure-P	A		SA	A	SA	A	A	A	SA	SA	A	A	N	A	A	A	N	A	N	A	A	SA	SA	N	N	A	A
2024-05-13 16:23:29	56-65	Male	POSTGRADUATE	SW	Ogun	Abeokuta north	Ward di	Yes	PDP	11-15 yrs	Yes	AD	Factionalization	Yes	LG Executive	Yes	MFR	No		SA	SA	A	A	A	A	A	A	N	A	A	A	N	A	A	A	N	A	N	N	A	A	A	N	A	A	A
2024-05-13 16:26:52	46-55	Male	HND/BSC/(FIRST DEGREE)	SW	Ondo	Ilaje local government	Ward j	Yes	PDP	16+ yrs	No			Yes	State Executive					SA	A	SA	SA	SA	SA	SA	SA	A	A	A	A	A	SA	A	SA	A	A	SA	SA	A	A	SA	SD	D	SA	SD
2024-05-14 12:15:44	56-65	Male	POSTGRADUATE	SW	Lagos	Epe	A4	Yes	PDP	16+ yrs	No			No		No		No		SA	A	N	N	A	N	D	SA	N	D	D	SA	D	D	N	N	A	SD	SD	N	D	SA	SA	SD	SD	D	N
2024-05-14 16:53:35	56-65	Male	HND/BSC/(FIRST DEGREE)	NE	Adamawa	Demsa	Borrong	Yes	PDP	1-5 yrs	No			No		No		Yes	Adviser/Assistant	SA	SA	A	SA	A	N	D	A	A	A	A	N	D	A	A	SD	SD	N	SD	N	A	A	A	N	D	D	D
2024-05-14 19:16:00	56-65	Male	POSTGRADUATE	SW	Lagos	Lagos Island	Langbasa	Yes	PDP	16+ yrs	No			Yes	State Executive	No		No		SA	D	N	SA	SA	SA	SA	A	SA	D	A	N	SD	N	N	A	A	A	N	SD	SA	SA	SA	A	N	N	A
2024-05-15 08:00:02	46-55	Female	NCE/ND/TCII	NE	Adamawa	LAMURDE LOCAL GOVERNMENT.	GYAWANA .	Yes	PDP	16+ yrs	No			Yes	LG Executive	No		Yes	VICE CHAIRMAN TRANSITION COMMITTEE.	SA	SA	SA	A	SA	A	A	A	SA	SA	A	A		A	A	A	A	A	A	A	A	A	SA	A	A	SA	A
2024-05-15 20:44:28	36-45	Female	NCE/ND/TCII	SS	Delta	Aniocha North	Onicha Ugbo	Yes	PDP	1-5 yrs	Yes	APC	Non Inclusion in Decision-making, Imposition of Candidates, Hijack of Party Structure	Yes	LG Executive	No		Yes	Adviser/Assistant	SA	SA	D	A	SA	N	A	SA	SA	SD	A	SA	D	D	D	D	A	A	SD	D	A	A	N	A	D	D	A
2024-05-15 21:19:36	66 and above	Male	POSTGRADUATE	SW	Lagos	Badagry	Ward E	Yes	PDP	16+ yrs	No			Yes		Yes		Yes	Boards	SA	SA	A	SA	A	A	A	A	A	A	SA	A	D	A	A	SA	SA	A	N	A	A	SA	A	N	A	A	A
2024-05-15 21:48:42	56-65	Male	POSTGRADUATE	NC	Nasarawa	Akwanga	Gwanje Gwanje	Yes	PDP	11-15 yrs	No			Yes	National Executive	Yes	MFR	Yes	Cabinet/Exco	SA	SA	A	N	D	A	SA	SA	A	A	D	D	A	A	A	A	D	D	A	A	SA	SA	SA	SA	A	A	D
2024-05-15 21:58:05	46-55	Female	POSTGRADUATE	NC	Nasarawa	Keffi	Angwan Iya 1	Yes	PDP	6-10 yrs	Yes	APC	Non Inclusion in Decision-making, Imposition of Candidates, Hijack of Party Structure	Yes	Zonal Executive	Yes	State Assembly	Yes	Boards	SA	SA	D	SA	SA	A	A	SA	SA	D	A	A	D	D	A	A	SA	SA	SD	D	SA	A	A	A	N	D	A
2024-05-15 22:05:09	36-45	Female	NCE/ND/TCII	NC	Nasarawa	Karu	Karshi 1	Yes	PDP	6-10 yrs	No			No		Yes	Ward Councilor	No		SA	D	SD	SA	SA	D	A	SA	SA	SD	A	SA	D	A	A	A	SA	A	SD	D	SA	N	N	A	D	D	A
2024-05-15 22:17:25	46-55	Female	WAEC/NECO	NC	Nasarawa	Lafia	Assakio	Yes	PDP	6-10 yrs	Yes	APC	Non Inclusion in Decision-making, Imposition of Candidates, Hijack of Party Structure	No		No		No		SA	A	SD	A	SA	D	A	SA	SA	SD	A	SA	D	A	A	D	SA	A	D	D	SA	A	A	A	N	D	A
2024-05-15 22:29:57	26-35	Female	HND/BSC/(FIRST DEGREE)	NC	Nasarawa	Nasarawa Egon	Agwuji/Ogbagi	Yes	PDP	6-10 yrs	No			Yes	Ward Executive	No		No		SA	A	D	A	SA	N	A	SA	SA	D	A	SA	D	A	A	A	SA	SA	SD	SD	A	A	N	N	D	D	A
2024-05-15 22:48:01	66 and above	Female	NCE/ND/TCII	NC	Nasarawa	Wamba	Wayo	Yes	PDP	16+ yrs	No			Yes	Ward Executive	No		Yes	Cabinet/Exco	SA	A	D	A	SA	N	A	SA	SA	SD	A	SA	D	D	D	D	A	A	SD	D	A	A	A	A	D	D	A
2024-05-17 18:45:10	46-55	Male	POSTGRADUATE	NC	Nasarawa	Awe	Tunga	Yes	PDP	6-10 yrs	Yes	APC	Imposition of Candidates, Hijack of Party Structure	No		Yes	MFR			SA	A	D	SA	SA	A	A	SA	SA	D	N	SA	D	D	D	D	A	A	D	D	SA	SA	SA	A	N	N	A
2024-05-17 18:51:32	46-55	Female	HND/BSC/(FIRST DEGREE)	SS	Delta	Aniocha North	Isselle Uku 1	Yes	PDP	11-15 yrs	No			Yes	State Executive	No				SA	A	D	A	SA	A	SA	SA	SA	D	A	SA	D	A	A	A	A	A	D	D	SA	A	A	SA	N	D	A
2024-05-17 18:57:26	36-45	Male	POSTGRADUATE	SS	Delta	Bomadi	Akugbene 11	Yes	PDP	6-10 yrs	No			Yes	State Executive	No				SA	A	D	A	SA	A	SA	SA	SA	SD	A	SA	D	D	D	SD	A	A	SD	D	SA	A	A	A	N	D	A
2024-05-17 19:54:57	36-45	Male	HND/BSC/(FIRST DEGREE)	SS	Delta	Ughelli South	Ewu 11	Yes	PDP	6-10 yrs	No			No		Yes	Ward Councilor	No		SA	A	D	A	SA	N	A	SA	SA	D	A	A	D	D	D	D	A	A	SD	SD	A	A	A	A	A	D	A
2024-05-18 10:00:52	46-55	Female	HND/BSC/(FIRST DEGREE)	SS	Delta	Oshimili North	Okpanam	Yes	PDP	11-15 yrs	No			No		Yes	State Assembly	Yes	Adviser/Assistant	SA	A	N	A		A	A	SA	SA	D	A	A	N	D	D	D	D	A	D	D	SA	A	A	A	A	SA	A
2024-05-18 11:18:01	56-65	Female	FSLC	NE	Adamawa	Fufore	Ribadu	Yes	PDP	11-15 yrs	No			Yes	State Executive	No		Yes	Adviser/Assistant	SA	A	D	A	SA	N	A	SA	SA	D	A	A	N	D	D	D	SA	A	SD	D	SA	A	A	A	A	N	A
2024-05-18 11:22:57	18-25	Female	NCE/ND/TCII	NE	Adamawa	Gombi	Yang	Yes	PDP	1-5 yrs	No			Yes	Ward Executive	No		No		SA	SA	N	A	SA	N	A	SA	SA	SD	A	A	N	N	D	D	A	A	D	SD	SA	N	N	A	N	N	A
2024-05-18 11:31:53	56-65	Female	FSLC	NE	Adamawa	Ganye	Yebbi	Yes	PDP	16+ yrs	No			Yes	State Executive	Yes	State Assembly	Yes	Cabinet/Exco	SA	A	D	A	SA	SA	A	SA	SA	D	A	A	A	D	D	D	A	A	SD	D	SA	A	A	SA	A	N	A
2024-05-18 17:59:38	56-65	Male	POSTGRADUATE	NC	Nasarawa	Toto	Shaffa kwotto	Yes	PDP	16+ yrs	No			Yes	National Executive	Yes	State Assembly	Yes	Cabinet/Exco	SA	SA	A	N	SA	SD	A	SA	A	A	N	D	SA	A	A	A	D	A	A	A	SA	SA	SA	SA	A	A	A
2024-05-18 19:57:58	36-45	Female	HND/BSC/(FIRST DEGREE)	NC	Nasarawa	Keffi	Angwan Iya 1	Yes	PDP	11-15 yrs	No			Yes	State Executive	Yes	State Assembly	No		SA	A	N	A	SA	SA	A	SA	SA	D	A	SA	D	D	D	D	SA	A	D	D	SA	A	A	SA	A	N	A
2024-05-18 20:33:42	26-35	Male	WAEC/NECO	NE	Adamawa	Mubi South	Gella	Yes	PDP	1-5 yrs	Yes	APC	Imposition of Candidates, Hijack of Party Structure	Yes	Ward Executive	No		No		SA	A	D	A	SA	N	A	SA	SA	D	A	A	D	D	D	D	SA	A	D	D	A	N	N	A	N	D	A
2024-05-18 21:18:08	36-45	Male	WAEC/NECO	NE	Adamawa	Mayo Belwa	Binyeri	Yes	PDP	11-15 yrs	No			Yes	LG Executive	No		Yes	LGA Supervisor	SA	SA	D	A	SA	A	A	SA	SA	SD	A	SA	D	D	SD	D	A	A	SD	D	SA	A	N	A	N	N	A
2024-05-18 21:25:43	66 and above	Male	WAEC/NECO	NE	Adamawa	Maiha	Humbutudi	Yes	PDP	16+ yrs	No			Yes	Zonal Executive	Yes	MFR	Yes	Cabinet/Exco	SA	SA	D	A	SA	SA	A	SA	SA	D	A	A	N	D	SD	N	N	A	N	N	SA	A	A	SA	A	N	A
2024-05-18 21:34:31	56-65	Female	HND/BSC/(FIRST DEGREE)	NE	Adamawa	Michika	Bazza Margi	Yes	PDP	1-5 yrs	Yes	APC	Imposition of Candidates, Hijack of Party Structure	Yes	LG Executive	No		Yes	Adviser/Assistant	SA	A	D	A	SA	A	A	SA	SA	SD	A	A	D	D	SD	D	SA	A	D	D	SA	N	N	A	N	N	A
2024-05-18 21:48:07	26-35	Female	NCE/ND/TCII	NE	Adamawa	Yola North	Yelwa	Yes	PDP	6-10 yrs	No			Yes	Ward Executive	No		Yes	Supervisory Of Works	SA	A	D	SA	SA	A	A	SA	SA	D	A	A	D	D	D	A	A	A	D	D	SA	A	A	A	D	N	A
2024-05-19 04:29:53	36-45	Female	WAEC/NECO	NE	Adamawa	Song	Dirma	Yes	PDP	6-10 yrs	Yes	APC	Imposition of Candidates, Hijack of Party Structure	Yes	Ward Executive	No		Yes	LGA Supervisor	SA	A	D	A	SA	N	A	SA	SA	D	A	A	N	D	D	D	A	A	D	SD	A	A	A	A	N	D	A
2024-05-19 05:05:17	36-45	Female	WAEC/NECO	NE	Adamawa	Mubi South	Dirb8shu/Gandira	Yes	PDP	6-10 yrs	No			No		No		Yes	Adviser/Assistant	SA	SA	D	A	SA	A	A	SA	SA	D	A	A	N	N	N	N	A	A	D	D	A	N	N	A	N	D	A
2024-05-19 08:01:32	36-45	Male	WAEC/NECO	NE	Adamawa	Gombi	Duwa	Yes	PDP	1-5 yrs	Yes	APC	Imposition of Candidates, Hijack of Party Structure	No		No		No		SA	SA	N	A	SA	N	A	SA	SA	D	A	SA	SD	D	D	D	SA	D	SD	SD	SA	N	N	A	N	D	A
2024-05-19 08:24:05	26-35	Female	FSLC	NE	Adamawa	Mayo Belwa	Gorobi	Yes	PDP	6-10 yrs	Yes	APC	Imposition of Candidates, Hijack of Party Structure	No		No		No		SA	SA	SD	A	SA	N	A	SA	SA	D	A	A	SD	SD	SD	SD	SA	A	SD	SD	SA	A	A	N	N	D	A
2024-05-19 08:37:45	56-65	Male	WAEC/NECO	NE	Adamawa	Hong	Goya	Yes	PDP	11-15 yrs	No			No		No		Yes	Adviser/Assistant	SA	SA	D	A	SA	A	A	SA	SA	D	A	A	SD	SD	SD	D	A	A	SD	SD	SA	A	A	A	N	SD	A
2024-05-19 10:58:13	18-25	Female	FSLC	NE	Adamawa	Yola South	Yolde Kohi	Yes	PDP	1-5 yrs	No			No		No		No		SA	SA	SD	A	SA	N	A	A	SA	D	A	A	N	D	D	D	SA	A	D	SD	A	A	N	A	N	N	A
2024-05-19 11:03:11	36-45	Female	WAEC/NECO	NE	Adamawa	Numan	Bolki	Yes	PDP	6-10 yrs	No			No		Yes	Ward Councilor	No		SA	A	D	A	SA	N	A	SA	SA	D	A	A	D	D	D	D	SA	A	D	SD	SA	A	A	A	N	D	A
2024-05-19 11:10:20	46-55	Female	WAEC/NECO	NE	Adamawa	Toungo	Toungo 111	Yes	PDP	11-15 yrs	No			No		No		Yes	Boards	SA	SA	N	A	SA	N	A	A	SA	D	A	A	D	D	D	D	A	A	D	D	A	A	A	A	N	D	A
2024-05-19 15:42:43	36-45	Female	NCE/ND/TCII	SW	Delta	Sapele	Sapele Urban 111	Yes	PDP	6-10 yrs	No			Yes	LG Executive	Yes	Ward Councilor	Yes	Boards	SA	SA	D	A	SA	N	A	SA	SA	D	A	A	D	D	D	D	A	A	D	D	A	N	N	A	N	D	A
2024-05-19 15:52:36	46-55	Female	NCE/ND/TCII	SS	Delta	Ughelli South	Jeremi 11	Yes	PDP	6-10 yrs	Yes	APC	Imposition of Candidates, Hijack of Party Structure	Yes	LG Executive	No		No		SA	SA	D	A	SA	A	A	A	SA	D	A	A	N	D	SD	D	A	A	D	D	SA	A	A	A	N	N	A
2024-05-20 23:49:22	46-55	Female	HND/BSC/(FIRST DEGREE)	SS	Delta	Ethiope East	Agbona 11	Yes	PDP	6-10 yrs	Yes	APC	Imposition of Candidates, Hijack of Party Structure	Yes	LG Executive	No		No		SA	A	D	A	SA	A	A	A	SA	D	A	A	N	D	D	D	A	A	D	D	SA	N	N	A	N	SD	A
2024-05-21 08:51:42	26-35	Female	NCE/ND/TCII	SS	Delta	Ika North East	Umunede	Yes	PDP	6-10 yrs	Yes	APC	Imposition of Candidates	Yes	Ward Executive	No		No		SA	A	D	A	SA	N	A	SA	SA	D	A	A	SD	D	D	D	A	A	D	D	A	N	N	A	N	D	A
2024-05-21 08:59:45	18-25	Male	WAEC/NECO	SS	Delta	Ika North East	Akumazi	Yes	PDP	1-5 yrs	No			Yes	Ward Executive	No		No		SA	A	SD	A	SA	N	A	SA	SA	D	A	A	D	D	SD	D	A	A	D	D	A	N	N	A	N	D	A
2024-05-21 09:18:18	36-45	Male	HND/BSC/(FIRST DEGREE)	SS	Delta	Ethiope West	Jesse 111	Yes	PDP	6-10 yrs	No			Yes	Ward Executive	No		No		SA	A	SD	A	SA	N	A	SA	SA	D	A	A	D	D	SD	SD	A	A	D	D	SA	A	A	A	N	D	N
2024-05-21 10:14:16	26-35	Female	WAEC/NECO	SS	Delta	Okpe	Orerokpe	Yes	PDP	6-10 yrs	No			No		No		Yes	Adviser/Assistant	SA	A	N	A	SA	D	N	A	A	D	A	A	N	D	D	D	A	A	D	D	A	N	N	A	N	N	A
2024-05-21 10:37:19	18-25	Male	WAEC/NECO	SS	Delta	Patani	Patani 111	Yes	PDP	6-10 yrs	No			No		Yes	Ward Councilor	Yes	Adviser/Assistant	SA	SA	D	A	SA	A	A	SA	SA	D	A	A	D	D	D	D	A	A	D	D	A	N	N	A	N	D	A
2024-05-21 10:58:54	46-55	Male	POSTGRADUATE	SS	Delta	Uvwie	Effurun 11	Yes	PDP	6-10 yrs	No			No		No		Yes	LGC Supervisor	SA	A			SA	N	A	SA	SA	D	A	A	D	D	D	D	A	A	D	D	A	A	A	A	N		A
2024-05-21 11:21:08	36-45	Male	HND/BSC/(FIRST DEGREE)	SS	Delta	Udu	Udu 111	Yes	PDP	6-10 yrs	No			No		No		Yes	Boards	SA	A	D	A	SA	A	A	SA	SA	D	A	A	D	D	D	D	A	A	D	D	A	A	N	A	N	N	A
2024-05-21 11:43:35	46-55	Female	HND/BSC/(FIRST DEGREE)	SS	Delta	Oshimili North	Illah	Yes	PDP	11-15 yrs	Yes	APC	Imposition of Candidates, Hijack of Party Structure	No		No		Yes	Cabinet/Exco	SA	SA	D	A	SA	A	A	SA	SA	D	A	A	D	D	D	D	A	A	D	D	A	A	A	A	N	D	A
2024-05-22 21:26:35	36-45	Male	NCE/ND/TCII	SS	Delta	Warri South West	Orere	Yes	PDP	6-10 yrs	No			No		No		Yes	Adviser/Assistant	SA	A	D	A	SA	N	A	A	SA	D	A	A	N	D	D	D	A	A	D	D	A	A	A	A	N	D	A
2024-05-22 21:51:03	26-35	Female	WAEC/NECO	SS	Delta	Oshimili South	Umuezie	Yes	PDP	6-10 yrs	Yes	APC	Imposition of Candidates	No		No		No		SA	SA	D	A	SA	N	A	SA	SA	D	A	A	D	D	SD	D	A	A	D	D	A	N	N	A	N	D	A
2024-05-22 22:11:00	18-25	Male	WAEC/NECO	SS	Delta	Ndokwa East	Olomoro	Yes	PDP	11-15 yrs	No			No		No		Yes	Boards	SA	SA	SD	A	SA	N	A	A	SA	D	A	A	N	D	SD	D	A	A	D	D	A	N	A	A	N	D	A
2024-05-22 22:41:02	56-65	Male	HND/BSC/(FIRST DEGREE)	NC	Nasarawa	Doma	Galadima	Yes	PDP	16+ yrs				No		Yes	Senator			SA	SA	N	A	SA	A	A	SA	SA	N	A	N	N	N	N	N	D	A	N	N	SA	A	A	A	A	N	A
2024-05-22 22:49:03	56-65	Male	HND/BSC/(FIRST DEGREE)	NC	Nasarawa	Akwanga	Kwaje Kwanje	Yes	PDP	11-15 yrs	No			No		Yes	Senator	No		SA	SA	A	A	SA	SA	A	SA	SA	N	N	N	D	N	N	N	D	A	N	N	SA	SA	SA	A	A	A	A
2024-05-29 15:10:39	36-45	Male	HND/BSC/(FIRST DEGREE)	NC	Nasarawa	Obi	Obi	Yes	PDP	11-15 yrs	No			No		Yes	State Assembly	Yes	Boards	SA	A	N	A	SA	SA	SA	SA	SA	N	A	N	N	D	N	N	D	A	N	N	SA	A	SA	SA	N	N	N
2024-05-29 16:09:54	46-55	Male	HND/BSC/(FIRST DEGREE)	NC	Nasarawa	Keana	Iwagu	Yes	PDP	11-15 yrs	No			Yes	State Executive	Yes	MFR	Yes	Adviser/Assistant	SA	A	A	A	SA	SA	A	SA	SA	N	A	N	D	A	N	A	D	A	N	N	SA	SA	SA	SA	A	A	A
2024-05-29 16:23:22	36-45	Male	HND/BSC/(FIRST DEGREE)	NC	Nasarawa	Wamba	Wamba East	Yes	PDP	6-10 yrs	No			No		Yes	MFR	No		SA	SA	A	A	SA	SA	A	SA	A	N	A	N	N	N	N	N	D	A	N	A	SA	SA	SA	SA	A	N	A
2024-05-30 19:45:48	36-45	Female	HND/BSC/(FIRST DEGREE)	SE	Imo	Ahiazu Mbaise	Umunumo 11	Yes	PDP	11-15 yrs	No			Yes	State Executive	Yes	Ward Councilor	Yes	Adviser/Assistant	SA	A	D	A	SA	A	A	A	SA	D	A	A	D	D	SD	D	A	A	SD	SD	A	A	A	A	N	N	A
2024-05-30 19:51:18	26-35	Female	NCE/ND/TCII	SE	Imo	Ideato South	Ntueke	Yes	PDP	6-10 yrs	No			No		No		No		SA	SA	D	A	SA	D	A	A	SA	SD	A	A	SD	D	SD	D	A	A	D	SD	A	N	N	A	N	D	A
2024-05-30 20:00:02	66 and above	Male	NCE/ND/TCII	SE	Imo	Ihitte/Uboma	Amakohia	Yes	PDP	11-15 yrs	No			No		Yes	Ward Councilor	Yes	Boards	SA	SA	SD	A	SA	N	A	A	SA	D	A	A	D	D	SD	D	A	A	SD	SD	A	A	N	A	N	SD	A
2024-05-30 20:13:02	36-45	Female	HND/BSC/(FIRST DEGREE)	SE	Imo	Isu	Isu Njaba 111	Yes	PDP	6-10 yrs	No			Yes	LG Executive	No		Yes	Adviser/Assistant	SA	SA	D	A	SA	N	A	A	SA	SD	A	A	D	D	D	D	A	A	D	D	A	N	N	A	N	D	A
2024-05-30 20:23:30	46-55	Male	HND/BSC/(FIRST DEGREE)	SE	Imo	Ngor Okpalla	Ozuzu	Yes	PDP	11-15 yrs	No			No		Yes	Ward Councilor	Yes	Cabinet/Exco	SA	SA	D	A	SA	N	A	SA	SA	D	A	A	D	D	SD	D	A	A	SD	SD	SA	A	A	A	N	D	A
2024-05-30 20:47:56	36-45	Female	HND/BSC/(FIRST DEGREE)	SE	Imo	Njaba	Atta 11	Yes	PDP	1-5 yrs	Yes	APC	Factionalization, Non Inclusion in Decision-making, Imposition of Candidates, Hijack of Party Structure	No		No		Yes	Boards	SA	SA	D	A	SA	N	A	A	SA	SD	A	A	SD	D	SD	D	A	A	D	SD	A	A	A	A	N	D	A
2024-05-30 21:03:02	56-65	Male	POSTGRADUATE	SE	Imo	Obowo	Avutu	Yes	PDP	6-10 yrs	Yes	APC	Factionalization, Imposition of Candidates	No		No		No		SA	A	D	A	SA	N	A	A	SA	SD	A	A	D	D	SD	D	A	A	SD	SD	A	A	N	A	N	D	A
2024-05-30 21:11:51	26-35	Female	HND/BSC/(FIRST DEGREE)	SE	Imo	Ohaji/Egbema	Egbema A	Yes	PDP	1-5 yrs	No			No		No		No		SA	SA	D	A	SA	N	N	A	SA	D	A	A	D	D	SD	D	A	D	SD	SD	A	N	N	A	N	D	A
2024-05-31 06:11:40	26-35	Female	HND/BSC/(FIRST DEGREE)	SE	Imo	Ehime Mbano	Nzerem Ikpe	Yes	PDP	1-5 yrs	No			Yes	Ward Executive	No		No		SA	SA	D	A	SA	D	A	A	SA	D	A	A	SD	SD	SD	SD	A	A	D	SD	A	N	N	A	N	D	A
2024-05-31 08:44:53	36-45	Female	HND/BSC/(FIRST DEGREE)	SE	Imo	Ideato North	Izuogu	Yes	PDP	11-15 yrs	No			Yes	State Executive	No		Yes	Adviser/Assistant	SA	SA	N	A	SA	A	A	SA	SA	D	A	A	N	D	SD	D	A	A	D	SD	SA	A	A	SA	N	N	A
2024-05-31 08:53:37	46-55	Female	HND/BSC/(FIRST DEGREE)	SE	Imo	Ikeduru	Amaimo	Yes	PDP	6-10 yrs	Yes	APC	Factionalization, Imposition of Candidates, Hijack of Party Structure	Yes	State Executive	No	State Assembly	No		SA	SA	D	A	SA	A	A	SA	SA	D	A	A	N	D	SD	D	A	A	D	SD	SA	A	A	A	N	D	A
2024-05-31 09:02:03	18-25	Female	NCE/ND/TCII	SE	Imo	Isiala Mbano	Ogbor	Yes	PDP	1-5 yrs	No			Yes	Ward Executive	No		No		SA	A	D	A	SA	D	A	A	SA	D	A	A	SD	SD	SD	SD	A	A	D	SD	SA	N	N	A	N	D	A
2024-05-31 09:08:20	46-55	Male	POSTGRADUATE	SE	Imo	Mbaitolu	Ogbaku	Yes	PDP	11-15 yrs	No			Yes	State Executive	Yes	Ward Councilor	Yes	Boards	SA	SA	N	A	SA	A	A	SA	SA	D	A	A	N	D	SD	D	A	A	SD	SD	SA	A	A	A	N	N	A
2024-05-31 09:15:09	26-35	Female	NCE/ND/TCII	SE	Imo	Nkwerre	Owerre Nkworji	Yes	PDP	6-10 yrs	No			Yes	LG Executive	Yes	Ward Councilor	No		SA	A	D	A	SA	N	A	SA	SA	D	A	A	D	SD	SD	SD	A	A	D	SD	A	N	N	A	N	D	A
2024-05-31 09:29:46	36-45	Female	NCE/ND/TCII	SE	Imo	Oru West	Amagu	Yes	PDP	6-10 yrs	No			Yes	Ward Executive	No		No		SA	SA	D	A	SA	D	A	A	SA	SD	A	A	SD	SD	SD	SD	SA	A	D	SD	A	N	N	A	N	D	A
2024-05-31 09:35:19	56-65	Male	POSTGRADUATE	SE	Imo	Owerri West	Obinze	Yes	PDP	6-10 yrs	No			Yes	LG Executive	No		No		SA	A	D	A	SA	N	A	SA	SA	SD	A	A	D	D	SD	D	A	A	D	SD	SA	N	N	A	N	N	A
2024-05-31 14:07:45	66 and above	Male	HND/BSC/(FIRST DEGREE)	SE	Imo	Aboh Mbaise	Ibeku	Yes	PDP	16+ yrs	No			No		Yes	Ward Councilor	Yes	Cabinet/Exco	SA	SA	N	A	SA	A	A	SA	SA	D	A	A	SD	D	SD	D	A	A	D	SD	SA	SA	SA	A	N	N	A
2024-05-31 14:20:36	18-25	Female	NCE/ND/TCII	SE	Imo	Ezinihitte Mbaise	Eziudo	Yes	PDP	1-5 yrs	No			Yes	Ward Executive	No		No		SA	A	N	A	SA	D	A	A	SA	D	A	A	SD	SD	SD	SD	A	A	D	SD	A	N	N	A	N	D	A
2024-05-31 14:35:23	26-35	Female	NCE/ND/TCII	SE	Imo	Nwangele	Umuozu	Yes	PDP	6-10 yrs	Yes	APC	Factionalization, Hijack of Party Structure	Yes	LG Executive	No		Yes	LGA Supervisor	SA	SA	D	A	SA	N	A	SA	SA	D	A	A	D	D	SD	D	A	A	D	SD	A	N	N	A	N	D	A
2024-05-31 14:43:31	26-35	Female	HND/BSC/(FIRST DEGREE)	SE	Imo	Ahiazu Mbaise	Mpam	Yes	PDP	6-10 yrs	Yes	APC	Factionalization, Hijack of Party Structure	Yes	Ward Executive	No		No		SA	A	D	N	A	D	N	A	A	D	A	A	D	D	D	D	A	D	SD	D	A	N	N	A	N	N	A
2024-06-03 00:26:21	46-55	Female	WAEC/NECO	SE	Imo	Okigwe	Aguobu	Yes	PDP	11-15 yrs	No			No		No		Yes	Adviser/Assistant	SA	SA	N	A	A	N	A	A	A	D	A	A	N	D	SD	D	A	A	D	D	A	N	N	A	N	N	A
2024-06-03 00:32:50	26-35	Female	NCE/ND/TCII	SE	Imo	Onuimo	Okwelle 11	Yes	PDP	1-5 yrs	Yes	APC	Factionalization, Hijack of Party Structure	No		No		No		SA	SA	N	A	A	N	A	SA	A	D	N	N	D	D	SD	D	A	A	SD	D	A	N	N	A	N	N	A
2024-06-03 00:40:47	18-25	Male	WAEC/NECO	SE	Imo	Oguta	Obidi/Aro	Yes	PDP	1-5 yrs	No			No		No		No		SA	A	N	A	SA	D	A	SA	A	N	N	A	N	D	SD	D	A	A	D	D	A	D	D	A	N	N	A
2024-06-06 21:51:13	36-45	Female	HND/BSC/(FIRST DEGREE)	SW	Lagos	Ojo	Ajangbadi	Yes	PDP	6-10 yrs	No			Yes	State Executive	No		No		SA	SA	D	SA	SA	N	A	A	SA	SA	SD	A	A	N	D	SD	D	A	A	SD	SD	SA	A	A	A	N	A
2024-06-06 21:57:34	26-35	Female	HND/BSC/(FIRST DEGREE)	SW	Lagos	Ajeromi-Ifelodun	Wilmer	Yes	PDP	1-5 yrs	No			Yes	Ward Executive	No		No		SA	SA	SD	A	SA	N	D	A	A	SA	SD	A	A	SD	D	SD	D	A	A	SD	SD	A	N	N	A	N	A
2024-06-06 22:03:19	18-25	Female	NCE/ND/TCII	SW	Lagos	Surulere	Adeniran/Ogunsanya	Yes	PDP	1-5 yrs	No			No		No		No		SA	A	N	A	SA	N	D	N	A	SA	SD	A	A	N	N	SD	N	A	A	D	D	A	D	N	A	N	A
2024-06-06 22:10:18	36-45	Female	HND/BSC/(FIRST DEGREE)	SW	Lagos	Amuwo Odofin	Festac 111	Yes	PDP	1-5 yrs	Yes	APC	Non Inclusion in Decision-making, Imposition of Candidates	No		No		No		SA	SA	D	A	SA	N	A	A	SA	A	D	A	A	SD	D	SD	D	A	A	D	D	A	N	N	A	N	SA
2024-06-06 22:23:02	26-35	Female	HND/BSC/(FIRST DEGREE)	SW	Lagos	Eti-Osa	Ikoyi 11	Yes	PDP	6-10 yrs	No			Yes	Ward Executive	No		No		SA	SA	D	A	SA	N	A	A	SA	SA	D	A	A	D	D	SD	D	A	A	SD	SD	A	A	N	A	N	A
2024-06-07 14:57:48	26-35	Male	HND/BSC/(FIRST DEGREE)	SW	Lagos	Kosofe	Ojota/Ogudu	Yes	PDP	6-10 yrs	No			Yes	LG Executive	No		No		SA	SA	D	A	SA	N	N	A	SA	SA	D	A	A	SD	D	SD	D	A	A	SD	D	A	N	N	A	N	A
2024-06-07 15:04:32	46-55	Female	HND/BSC/(FIRST DEGREE)	SW	Lagos	Alimosho	Shasha/Akowonjo	Yes	PDP	6-10 yrs	No			Yes	State Executive	No		No		SA	SA	N	SA	SA	N	A	A	SA	SA	D	A	A	N	D	SD	D	A	A	D	D	A	A	A	SA	N	A
2024-06-07 15:13:34	26-35	Female	HND/BSC/(FIRST DEGREE)	SW	Lagos	Agege	Okekoto	Yes	PDP	1-5 yrs	No			Yes	Ward Executive	No		No		SA	A	SD	A	SA	N	N	A	SA	A	SD	A	A	SD	D	SD	D	A	A	SD	SD	SA	D	N	A	N	A
2024-06-07 15:28:36	46-55	Male	POSTGRADUATE	SW	Lagos	Ikeja	Ojodu/Agidingbi/Omole	Yes	PDP	11-15 yrs	No			No		No		No		SA	SA	A	A	SA	N	N	A	SA	SA	D	N	D	N	N	SD	D	A	A	A	SD	SA	A	N	A	N	A
2024-06-07 15:39:37	26-35	Female	NCE/ND/TCII	SW	Lagos	Ibeju Lekki	Lekki 1	Yes	PDP	1-5 yrs	No			No		No		No		SA	SA	N	A	SA	D	N	A	A	SA	D	A	A	SD	D	SD	D	A	A	D	SD	A	N	N	A	N	A
2024-06-07 15:45:42	26-35	Female	NCE/ND/TCII	SW	Lagos	Epe	Ejirin	Yes	PDP	1-5 yrs	No			Yes	Ward Executive	No		No		SA	SA	D	A	SA	N	N	A	SA	SA	SD	A	A	D	D	SD	D	N	A	SD	SD	A	N	N	A	N	A
2024-06-07 15:54:06	36-45	Female	HND/BSC/(FIRST DEGREE)	SW	Lagos	Ifako-Ijaye	Ijaiye/Ojokoro	Yes	PDP	6-10 yrs	Yes	APC	Imposition of Candidates	No		No		No		SA	SA	N	A	A	N	N	A	A	A	D	A	A	N	D	SD	D	A	D	SD	SD	A	A	A	A	N	A
2024-06-07 19:21:12	36-45	Male	WAEC/NECO	SW	Lagos	Somolu	Bajulaiye	Yes	PDP	6-10 yrs	No			No		No		No		SA	A	N	A	SA	N	N	A	SA	SA	N	A	A	N	D	SD	D	N	A	SD	D	SA	A	A	SA	A	A
2024-06-07 19:25:44	26-35	Female	FSLC	SW	Lagos	Oshodi/Isolo	Ilasamaja	Yes	PDP	1-5 yrs	Yes	APC	Imposition of Candidates	No		No		Yes	Boards	SA	A	N	A	SA	N	N	A	SA	A	D	A	A	D	N	N	N	A	A	D	D	A	N	N	A	N	A
2024-06-07 19:29:03	36-45	Female	WAEC/NECO	SW	Lagos	Lagos Mainland	Oko-Baba	Yes	PDP	6-10 yrs	No			Yes	LG Executive	No		No		SA	SA	D	A	SA	D	N	A	SA	SA	SD	A	A	D	D	SD	D	A	A	SD	D	SA	A	A	A	N	A
2024-06-07 19:32:29	18-25	Male	WAEC/NECO	SW	Lagos	Lagos Mainland	Alagomeji	Yes	PDP	1-5 yrs	No			No		No		No		SA	A	N	N	A	N	D	A	A	SA	N	A	A	N	N	N	N	A	A	D	D	A	D	N	A	N	A
2024-06-11 19:57:53	66 and above	Male	POSTGRADUATE	SS	Delta	Aniocha North	Idumueje-Unor	Yes	PDP	6-10 yrs	No			No		Yes	Senator	No		SA	SA	N	A	SA	A	SA	A	SA	SA	N	A	A	N	N	D	N	D	A	N	SD	SA	SA	SA	A	N	A
2024-06-11 20:20:23	46-55	Male	HND/BSC/(FIRST DEGREE)	SS	Delta	Ndokwa East	Aboh/Akarrai	Yes	PDP	11-15 yrs	No			No		Yes	MHR	Yes	Cabinet/Exco	SA	SA	A	A	SA	N	SA	A	SA	SA	D	A	N	N	N	N	N	D	A	D	D	SA	A	A	A	N	A
2024-06-11 21:07:45	36-45	Male	HND/BSC/(FIRST DEGREE)	SS	Delta	Ukwuani	Obiaruku	Yes	PDP	6-10 yrs	No			No		Yes	State Assembly	No		SA	SA	N	A	SA	N	SA	A	SA	SA	D	A	A	D	D	D	D	D	A	D	D	SA	A	A	A	N	A
2024-06-11 21:13:41	36-45	Female	POSTGRADUATE	SS	Delta	Ika North East	Akumazi	Yes	PDP	6-10 yrs	No			No		Yes	State Assembly	Yes	Adviser/Assistant	SA	SA	N	A	SA	N	A	A	SA	SA	D	A	N	D	D	D	D	D	A	D	SD	SA	A	A	A	N	A
2024-06-11 21:19:36	46-55	Female	POSTGRADUATE	SS	Delta	Oshimili North	Ibusa	Yes	PDP	16+ yrs	No			No		Yes	State Assembly	No		SA	SA	N	A	SA	N	A	A	SA	SA	D	A	N	D	D	SD	D	D	A	D	SD	A	A	A	A	N	A
2024-06-13 09:11:50	26-35	Female	NCE/ND/TCII	NW	Kaduna	Jema'a	Kagoma	Yes	PDP	6-10 yrs	No			Yes	LG Executive	No		No		SA	SA	D	A	SA	D	N	A	SA	SA	SD	A	A	D	D	SD	D	SA	A	SD	SD	SA	A	A	SA	N	SA
2024-06-13 09:18:23	36-45	Female	HND/BSC/(FIRST DEGREE)	NW	Kaduna	Ikara	Ikara	Yes	PDP	6-10 yrs	Yes	APC	Imposition of Candidates, Hijack of Party Structure	Yes	State Executive	Yes	Ward Councilor	No		SA	A	D	A	SA	D	A	A	SA	SA	SD	A	A	D	D	SD	D	A	A	SD	D	SA	A	A	SA	A	A
2024-06-13 09:25:13	26-35	Female	WAEC/NECO	NW	Kaduna	Jaba	Fada	Yes	PDP	1-5 yrs	No			No		No		No		SA	A	SD	A	SA	D	N	A	SA	SA	SD	A	A	N	SD	SD	SD	A	A	D	N	SA	A	N	A	N	A
2024-06-13 09:35:28	36-45	Male	HND/BSC/(FIRST DEGREE)	NW	Kaduna	Kaduna South	Sabon Gari South	Yes	PDP	6-10 yrs	Yes	APC	Imposition of Candidates, Hijack of Party Structure	No		No		No		SA	A	D	A	SA	D	N	A	SA	SA	SD	A	A	N	D	SD	D	A	A	SD	SD	SA	A	A	A	N	A
2024-06-13 09:41:51	26-35	Female	WAEC/NECO	NW	Kaduna	Kajuru	Kufana	Yes	PDP	1-5 yrs	No			Yes	Ward Executive	No		No		SA	A	SD	A	SA	D	D	A	SA	SA	SD	A	A	D	D	SD	D	A	A	SD	D	A	N	N	A	A	A
2024-06-13 09:51:01	56-65	Male	HND/BSC/(FIRST DEGREE)	NW	Kaduna	Kubau	Zabi	Yes	PDP	11-15 yrs	No			Yes	State Executive	No		Yes	Cabinet/Exco	SA	SA	D	A	SA	N	A	A	SA	SA	SD	A	A	D	D	SD	D	A	A	SD	D	SA	A	A	A	N	A
2024-06-13 09:58:57	26-35	Female	WAEC/NECO	NW	Kaduna	Makarfi	Tudun Wada	Yes	PDP	1-5 yrs	No			No		No		No		SA	A	SD	A	SA	N	N	A	SA	SA	SD	A	A	SD	D	SD	D	SA	A	SD	D	A	N	N	A	A	A
2024-06-13 10:13:12	46-55	Female	HND/BSC/(FIRST DEGREE)	NW	Kaduna	Kachia	Katari	Yes	PDP	6-10 yrs	No			No		No		No		SA	SA	D	A	SA	N	N	A	SA	SA	SD	A	A	N	D	SD	D	SA	A	SD	D	SA	A	A	SA	A	A
2024-06-13 10:20:09	46-55	Female	HND/BSC/(FIRST DEGREE)	NW	Kaduna	Kagarko	Kagarko South	Yes	PDP	11-15 yrs	No			Yes	State Executive	No		No		SA	SA	D	A	SA	N	A	A	SA	SA	SD	A	A	D	D	SD	D	A	A	SD	D	SA	A	A	SA	A	A
2024-06-13 10:31:18	26-35	Female	NCE/ND/TCII	NW	Kaduna	Kauru	Dawaki	Yes	PDP	1-5 yrs	No			No		No		No		SA	A	D	A	SA	N	N	A	SA	SA	SD	A	A	D	D	SD	D	A	A	SD	D	A	N	N	A	N	A
2024-06-13 10:36:52	18-25	Female	WAEC/NECO	NW	Kaduna	Kaura	Kaura	Yes	PDP	1-5 yrs	No			No		No		No		SA	A	D	A	SA	D	N	A	SA	SA	SD	A	A	SD	D	SD	D	SA	A	SD	D	SA	N	N	A	N	A
2024-06-13 18:29:53	26-35	Female	HND/BSC/(FIRST DEGREE)	NW	Kaduna	Kaduna North	Gaji	Yes	PDP	1-5 yrs	Yes	APC	Imposition of Candidates	No		No		No		SA	A	D	A	SA	N	N	A	SA	SA	SD	A	A	D	D	SD	D	SA	A	SD	D	A	N	N	A	A	A
2024-06-13 18:36:31	36-45	Male	WAEC/NECO	NW	Kaduna	Kudan	Zabi	Yes	PDP	6-10 yrs	No			Yes	LG Executive	No		No		SA	A	D	A	SA	N	N	A	SA	SA	SD	A	A	SD	D	SD	D	SA	A	SD	SD	SA	A	A	SA	A	A
2024-06-13 18:39:33	46-55	Female	WAEC/NECO	NW	Kaduna	Lere	Garu	Yes	PDP	6-10 yrs	No			Yes	LG Executive	No		No		SA	A	SD	A	SA	N	N	A	SA	A	D	A	A	N	D	D	D	A	A	SD	D	A	N	N	A	A	A
2024-06-13 18:44:03	18-25	Male	WAEC/NECO	NW	Kaduna	Soba	Gimba	Yes	PDP	1-5 yrs	No			No		No		No		SA	SA	D	A	SA	N	N	A	SA	SA	SD	A	A	D	D	SD	D	A	A	SD	D	A	N	N	A	N	A
2024-06-13 18:48:30	36-45	Female	NCE/ND/TCII	NW	Kaduna	Zomgon Kataef	Gora	Yes	PDP	1-5 yrs	Yes	APC	Imposition of Candidates	No		No		No		SA	A	D	A	SA	N	A	A	SA	SA	SD	A	A	D	D	D	D	A	A	SD	D	A	N	N	A	N	A
2024-06-13 18:58:56	26-35	Female	WAEC/NECO	NW	Kaduna	Zaria	Dambo	Yes	PDP	1-5 yrs	No			No		No		No		SA	SA	N	A	A	N	N	A	SA	SA	SD	A	A	N	D	SD	D	SA	A	SD	SD	SA	N	N	A	N	A
2024-06-13 19:08:14	26-35	Male	WAEC/NECO	NW	Kaduna	Sanga	Ayu	Yes	PDP	1-5 yrs	No			Yes	Ward Executive	No		No		SA	A	D	A	SA	N	N	A	SA	SA	SD	A	A	N	D	SD	D	A	A	SD	D	A	A	A	A	N	A
2024-06-13 19:16:24	36-45	Female	WAEC/NECO	NW	Kaduna	Sabon Gari	Bomo	Yes	PDP	6-10 yrs	No			Yes	LG Executive	No		No		SA	A	N	A	SA	N	N	A	SA	SA	SD	A	A	N	D	D		A	A	SD	D	A	N	N	A	A	A
2024-06-13 19:41:11	26-35	Female	WAEC/NECO	NW	Kaduna	Igabi	Igabi	Yes	PDP	1-5 yrs	No			Yes	Ward Executive	No		No		SA	A	D	A	SA	N	N	A	SA	SA	SD	A	A	SD	D	SD	D	SA	A	SD	D	SA	N	N	A	A	A
2024-06-13 19:52:31	26-35	Female	WAEC/NECO	NW	Kaduna	Giwa	Kadangi	Yes	PDP	1-5 yrs	No			No		No		No		SA	A	SD	A	SA	D	N	A	SA	SA	SD	A	A	SD	D	D	D	SA	A	SD	SD	SA	A	A	A	A	A
2024-06-13 19:56:19	26-35	Male	NCE/ND/TCII	NW	Kaduna	Giwa	Shika	Yes	PDP	1-5 yrs	No			Yes	Ward Executive	No		No		SA	A	D	A	SA	D	N	A	SA	SA	SD	A	A	SD	D	SD	D	SA	A	SD	D	SA	N	N	A	N	A
2024-06-22 19:30:30	56-65	Male	POSTGRADUATE	SS	Delta	Bomadi	Ogbeinama/Okoloba	Yes	PDP	16+ yrs	No			Yes	State Executive	Yes	Senator	Yes	Cabinet/Exco	SA	SA	D	A	SA	N	SA	A	SA	SA	D	A	A	N	N	D	N	D	A	D	D	SA	SA	SA	A	N	A
2024-06-22 20:05:26	56-65	Male	POSTGRADUATE	NC	Nasarawa	Akwanga	Akwanga west	Yes	PDP	16+ yrs	No			No		Yes	Senator	No		SA	SA	N	A	SA	N	SA	A	SA	SA	D	A	A	D	N	D	N	D	A	D	D	SA	SA	SA	A	A	A
2024-06-22 22:53:13	66 and above	Male	POSTGRADUATE	NE	Adamawa	Mayo-Belwa	Ribadu	Yes	PDP	11-15 yrs	No			Yes	State Executive	Yes	Senator	No		SA	SA	N	A	SA	N	SA	A	SA	SA	D	A	A	D	D	SD	N	D	A	D	D	A	SA	SA	A	N	A
2024-06-23 09:30:25	46-55	Male	POSTGRADUATE	NE	Adamawa	Hong	Uba	Yes	PDP	6-10 yrs	Yes	APC	Factionalization, Non Inclusion in Decision-making, Imposition of Candidates	No		Yes	Senator	No		SA	SA	N	A	SA	N	SA	A	SA	SA	D	A	A	N	N	D	N	D	A	D	D	SA	SA	SA	A	A	A
2024-06-23 10:39:13	56-65	Male	HND/BSC/(FIRST DEGREE)	SE	Imo	Ikeduru	Amaimo	Yes	PDP	16+ yrs	No			Yes	National Executive	Yes	Senator	Yes	Caretaker LGA Chairman	SA	SA	A	A	SA	N	SA	A	SA	SA	N	A	N	A	N	N	N	D	A	D	SD	SA	SA	SA	SA	A	A
2024-06-23 10:54:07	66 and above	Male	HND/BSC/(FIRST DEGREE)	SE	Imo	Isiala Mbano		Yes	PDP	6-10 yrs	Yes	APC	Non Inclusion in Decision-making, Imposition of Candidates	No		Yes	Senator	Yes	Boards	SA	SA	D	A	SA	N	SA	A	SA	SA	D	A	A	N	D	D	D	N	A	SD	D	SA	A	N	A	A	A
2024-06-23 14:11:58	56-65	Male	POSTGRADUATE	NW	Kaduna	Zangon Kataf	Madakiya	Yes	PDP	11-15 yrs	No			No		Yes	Senator	No		SA	SA	N	A	SA	N	SA	A	SA	SA	SD	A	A	N	D	SD	D	D	A	SD	SD	SA	SA	SA	A	A	A
2024-06-23 14:18:33	66 and above	Male	POSTGRADUATE	NW	Kaduna	Markafi	Markafi	Yes	PDP	16+ yrs	No			Yes	National Executive	Yes	Senator	Yes	Cabinet/Exco	SA	SA	A	A	A	N	SA	A	SA	SA	SD	A	A	A	N	N	N	D	A	SD	SD	SA	SA	SA	SA	A	A
2024-06-24 12:23:30	56-65	Male	HND/BSC/(FIRST DEGREE)	SS	Delta	Bomadi	Bomadi 1	Yes	PDP	16+ yrs	No			No		Yes	MHR	No		SA	SA	N	A	SA	N	SA	A	SA	SA	D	A	A	N	D	SD	D	SD	A	SD	D	SA	SA	SA	A	A	A
2024-06-24 12:26:55	36-45	Female	HND/BSC/(FIRST DEGREE)	SS	Delta	Ethiope West	Oghara	Yes	PDP	6-10 yrs	No			No		Yes	MHR	Yes	Adviser/Assistant	SA	SA	D	A	SA	N	SA	A	SA	SA	SD	A	A	D	D	SD	D	N	A	SD	D	SA	A	A	A	N	A
2024-06-24 13:04:50	56-65	Male	HND/BSC/(FIRST DEGREE)	NE	Adamawa	Numan	Mburu	Yes	PDP	11-15 yrs	No			Yes	State Executive	Yes	MHR	Yes	Cabinet/Exco	SA	SA	N	A	SA	N	SA	A	SA	SA	SD	A	A	N	D	SD	D	D	A	SD	D	SA	SA	SA	A	A	A
2024-06-24 13:23:50	56-65	Male	HND/BSC/(FIRST DEGREE)	NE	Adamawa	Jada	Mayokalaye	Yes	PDP	11-15 yrs	No			Yes	State Executive	Yes	MHR	Yes	Cabinet/Exco	SA	SA	N	A	SA	N	SA	A	SA	SA	SD	A	A	D	D	SD	D	D	A	SD	D	SA	A	A	A	A	A
2024-06-24 13:38:40	26-35	Male	HND/BSC/(FIRST DEGREE)	SE	Imo	Ideato North	Umuokwara	Yes	PDP	1-5 yrs	No			No		Yes	MHR	Yes	Adviser/Assistant	SA	SA	D	A	SA	N	SA	A	SA	SA	SD	A	A	D	D	SD	D	N	A	SD	D	SA	A	A	A	A	A
2024-06-24 13:42:25	56-65	Male	HND/BSC/(FIRST DEGREE)	SE	Imo	Aboh Mbaise	Mbutu	Yes	PDP	16+ yrs	No			No		Yes	MHR	Yes	Adviser/Assistant	SA	SA	D	A	A	D	SA	A	SA	SA	SD	A	A	D	D	SD	D	D	A	SD	D	SA	SA	SA	A	A	A
2024-06-25 13:39:40	46-55	Male	POSTGRADUATE	NW	Kaduna	Sabon Gari	Dogorawa	Yes	PDP	6-10 yrs	No			No		Yes	MHR	Yes	Boards	SA	SA	D	A	SA	D	SA	A	SA	SA	SD	A	A	D	D	SD	D	N	A	SD	D	SA	A	A	A	A	A
2024-06-25 13:46:43	56-65	Male	POSTGRADUATE	NW	Kaduna	Jaba	Fada	Yes	PDP	16+ yrs	No			No		Yes	MHR	Yes	Adviser/Assistant	SA	SA	D	A	SA	D	SA	A	SA	SA	SD	A	A	D	D	SD	D	D	A	SD	D	SA	SA	SA	A	A	A
2024-06-26 10:46:59	46-55	Male	HND/BSC/(FIRST DEGREE)	SW	Lagos	Ojo	Ojo	Yes	PDP	11-15 yrs	No			No		Yes	MHR	No		SA	SA	D	A	SA	D	SA	A	SA	SA	SD	A	A	D	D	SD	D	D	A	SD	SD	SA	SA	SA	SA	A	A
2024-06-26 11:01:22	66 and above	Male	HND/BSC/(FIRST DEGREE)	SW	Lagos	Amuwo Odofin	Festac	Yes	PDP	6-10 yrs	No			No		Yes	MHR	No		SA	SA	D	A	A	D	SA	A	SA	SA	SD	A	A	D	D	SD	D	D	A	SD	D	SA	SA	SA	SA	A	A
2024-06-30 13:48:56	46-55	Male	HND/BSC/(FIRST DEGREE)	NW	Kaduna	Jema'a	Kagoma	Yes	PDP	1-5 yrs	Yes	APC	Non Inclusion in Decision-making, Imposition of Candidates	No		Yes	State Assembly	No		SA	SA	D	A	SA	N	A	A	SA	SA	SD	A	A	D	D	SD	D	N	A	SD	D	SA	SA	SA	A	A	A
2024-06-30 13:51:57	46-55	Male	NCE/ND/TCII	NW	Kaduna	Kachia	Doka	Yes	PDP	6-10 yrs	No			Yes	LG Executive	Yes	State Assembly	No		SA	SA	D	A	SA	N	A	A	SA	SA	SD	A	A	D	D	SD	D	D	A	SD	D	SA	SA	SA	A	A	A
2024-06-30 14:18:53	26-35	Male	HND/BSC/(FIRST DEGREE)	NW	Kaduna	Markafi	Markafi	Yes	PDP	1-5 yrs	No			Yes	National Executive	No		No		SA	SA	N	A	SA	N	SA	A	SA	SA	N	A	N	N	N	N	N	D	A	N	D	SA	SA	SA	SA	A	A
2024-06-30 14:22:10	46-55	Male	HND/BSC/(FIRST DEGREE)	NW	Kaduna	Kajuru	Kajuru	Yes	PDP	6-10 yrs	No			Yes	LG Executive	Yes	State Assembly	No		SA	SA	D	SA	SA	N	SA	A	SA	SA	SD	A	A	D	D	SD	D	D	A	SD	D	SA	SA	SA	SA	A	A
2024-06-30 18:52:02	36-45	Male	HND/BSC/(FIRST DEGREE)	NC	Nasarawa	Karu	Aso/Kodape	Yes	PDP	6-10 yrs	No			Yes	State Executive	Yes	State Assembly	No		SA	SA	D	A	SA	D	SA	A	SA	SA	SD	A	A	D	D	SD	D	D	A	SD	D	SA	A	A	A	N	A
2024-06-30 18:54:43	36-45	Male	HND/BSC/(FIRST DEGREE)	NC	Nasarawa	Lafia	Assakio	Yes	PDP	6-10 yrs	Yes	APC	Imposition of Candidates, Hijack of Party Structure	No		Yes	State Assembly	No		SA	SA	D	A	SA	D	SA	A	SA	SA	SD	A	A	D	D	SD	D	A	A	SD	D	SA	A	A	SA	A	A
2024-06-30 19:25:11	36-45	Female	HND/BSC/(FIRST DEGREE)	NE	Adamawa	Demsa	Dong	Yes	PDP	6-10 yrs	No			Yes	LG Executive	Yes	State Assembly	Yes	Adviser/Assistant	SA	SA	D	SA	SA	D	SA	A	SA	SA	D	A	A	SD	D	SD	D	N	A	SD	D	SA	SA	SA	SA	A	A
2024-06-30 19:27:52	36-45	Male	NCE/ND/TCII	NE	Adamawa	Jada	Mbulo	Yes	PDP	6-10 yrs	No			No		Yes	State Assembly	No		SA	SA	N	A	A	N	SA	A	SA	SA	SD	N	N	SD	D	SD	D	N	A	SD	D	SA	SA	SA	SA	A	A
2024-06-30 19:38:37	46-55	Male	HND/BSC/(FIRST DEGREE)	NE	Adamawa	Hong	Daksiri	Yes	PDP	11-15 yrs	No			Yes	National Executive	No		Yes	Cabinet/Exco	SA	SA	A	A	A	N	SA	A	SA	SA	N	N	N	A	A	N	N	N	A	D	D	SA	SA	SA	SA	A	SA
2024-07-01 13:08:44	66 and above	Male	HND/BSC/(FIRST DEGREE)	SS	Delta	Isoko North	Ellu	Yes	PDP	16+ yrs	No			Yes	National Executive	No		No		SA	SA	D	A	SA	N	SA	A	SA	SA	D	N	N	A	N	N	N	D	A	D	D	SA	SA	SA	SA	A	A
2024-07-01 13:13:24	56-65	Male	POSTGRADUATE	SS	Delta	Aniocha South	Ogwashi Uku	Yes	PDP	16+ yrs	No			Yes	Zonal Executive	Yes	MHR	Yes	Adviser/Assistant	SA	SA	D	A	SA	D	SA	A	SA	SA	SD	A	A	D	D	SD	D	D	A	SD	SD	SA	SA	SA	SA	A	A
2024-07-07 17:28:40	46-55	Female	HND/BSC/(FIRST DEGREE)	SE	Imo	Isu	Ekwe	Yes	PDP	11-15 yrs	No			No		Yes	State Assembly	Yes	Adviser/Assistant	SA	SA	D	A	SA	D	SA	A	SA	SA	SD	A	A	D	D	SD	D	N	A	SD	D	SA	SA	SA	SA	A	A
2024-07-08 16:39:17	46-55	Male	POSTGRADUATE	SE	Imo	Aboh Mbaise	Uvuru	Yes	PDP	11-15 yrs	No			Yes	State Executive	Yes	State Assembly	Yes	Adviser/Assistant	SA	SA	D	A	SA	D	A	A	SA	SA	SD	A	N	N	SD	SD	SD	N	A	SD	SD	SA	SA	SA	A	A	A
2024-07-08 16:44:36	46-55	Male	HND/BSC/(FIRST DEGREE)	SE	Imo	Ideato South	Isiekenesi 1	Yes	PDP	11-15 yrs	No			No		Yes	State Assembly	No		SA	SA	D	A	SA	D	A	A	SA	SA	SD	N	N	D	SD	D	SD	N	A	SD	SD	SA	SA	A	SA	A	A

## Sheet: Form Responses 1
Timestamp	1.Select Your Age bracket	2.Gender	3.Educational Attainment	4.Geopolitical Zone	5.State of Origin	6.Local Government Origin	7.Electoral Ward	8.Are you a member of a political party?	9.What is your party affiliation?	10. For how long have you been a member the party?	11. Have you ever changed your party membership?	12. If your answer to question 11 above is yes, please state the political party you changed from	13.Why did you change/defect?	14.Have you	14.Are you holding any party position currently or held any party position before: :	15.What was/is your position in the party (Note: If answer to the previous question is NO please ignore)	16.Have you been elected into any public office/position?	17.What is the position? (Note: If answer to the previous question is NO please ignore)	18.As a party man, have you ever been appointed to a public position?	19.What is/was the position?	How does decentralized organizational structure impact on the membership stability of your Party? Where: Strongly Agree (SA), Agree (A), Neutral (N), Disagree (D) and Strongly Disagree (SD) [1. My party has structures at the national, zonal, state, local and ward levels]	How does decentralized organizational structure impact on the membership stability of your Party? Where: Strongly Agree (SA), Agree (A), Neutral (N), Disagree (D) and Strongly Disagree (SD) [2. In my party, power is distributed among national, state and local party Branches.]	How does decentralized organizational structure impact on the membership stability of your Party? Where: Strongly Agree (SA), Agree (A), Neutral (N), Disagree (D) and Strongly Disagree (SD) [3. The Chapters/Branches effectively perform responsibilities assigned to them by the party constitution]	How does decentralized organizational structure impact on the membership stability of your Party? Where: Strongly Agree (SA), Agree (A), Neutral (N), Disagree (D) and Strongly Disagree (SD) [4. Decentralized organizational structure could positively influence the recruitment and retention of members in a party]	How does decentralized organizational structure impact on the membership stability of your Party? Where: Strongly Agree (SA), Agree (A), Neutral (N), Disagree (D) and Strongly Disagree (SD) [ 5. Commitment of party members is enhanced when they participate in decision-making process of the party]	How does decentralized organizational structure impact on the membership stability of your Party? Where: Strongly Agree (SA), Agree (A), Neutral (N), Disagree (D) and Strongly Disagree (SD) [7. I have always paid my monthly dues.]	How does decentralized organizational structure impact on the membership stability of your Party? Where: Strongly Agree (SA), Agree (A), Neutral (N), Disagree (D) and Strongly Disagree (SD) [8 . Party leaders sometimes pay dues for members]	How does decentralized organizational structure impact on the membership stability of your Party? Where: Strongly Agree (SA), Agree (A), Neutral (N), Disagree (D) and Strongly Disagree (SD) [9. Infact, party leaders finance the party activities and programmes]	How does decentralized organizational structure impact on the membership stability of your Party? Where: Strongly Agree (SA), Agree (A), Neutral (N), Disagree (D) and Strongly Disagree (SD) [10. Not taking part in decision making affects the sense of party ownership and commitment among members]	How does decentralized organizational structure impact on the membership stability of your Party? Where: Strongly Agree (SA), Agree (A), Neutral (N), Disagree (D) and Strongly Disagree (SD) [11. The centralized pattern of decision making in the party positively affects party membership stability]	How does decentralized organizational structure impact on the membership stability of your Party? Where: Strongly Agree (SA), Agree (A), Neutral (N), Disagree (D) and Strongly Disagree (SD) [12.Granting of more autonomy to local party chapters/branches could positively impact in their ability to retain members and foster loyalty]	Are there significant differences in the relationships between decentralized party organization and inclusive local participation in decision making in your Party? Where: Strongly Agree (SA), Agree (A), Neutral (N), Disagree (D) and Strongly Disagree (SD) [1. Strong national party leadership’s control hinders the level of local autonomy in decision-making processes of our party]	Are there significant differences in the relationships between decentralized party organization and inclusive local participation in decision making in your Party? Where: Strongly Agree (SA), Agree (A), Neutral (N), Disagree (D) and Strongly Disagree (SD) [2. All Chapters/Branches of our party have reliable sources of funding]	Are there significant differences in the relationships between decentralized party organization and inclusive local participation in decision making in your Party? Where: Strongly Agree (SA), Agree (A), Neutral (N), Disagree (D) and Strongly Disagree (SD) [3. The nature of power distribution amongst our party Chapters/Branches ensures the inclusion of diverse local viewpoints in decision-making]	Are there significant differences in the relationships between decentralized party organization and inclusive local participation in decision making in your Party? Where: Strongly Agree (SA), Agree (A), Neutral (N), Disagree (D) and Strongly Disagree (SD) [4. The pattern of decision made at the Chapters/Branches of our party influences national party decision]	Are there significant differences in the relationships between decentralized party organization and inclusive local participation in decision making in your Party? Where: Strongly Agree (SA), Agree (A), Neutral (N), Disagree (D) and Strongly Disagree (SD) [5. The current structure of my party encourages members from diverse background to participate in decision making process]	Are there significant differences in the relationships between decentralized party organization and inclusive local participation in decision making in your Party? Where: Strongly Agree (SA), Agree (A), Neutral (N), Disagree (D) and Strongly Disagree (SD) [6. The conduct of party primaries by national leadership of our party discourages accountability of elected representatives to their local bra…	Are there significant differences in the relationships between decentralized party organization and inclusive local participation in decision making in your Party? Where: Strongly Agree (SA), Agree (A), Neutral (N), Disagree (D) and Strongly Disagree (SD) [7. Consideration of diverse viewpoints from Chapters/Branches could enhance greater participation in decision-making in a party]	Are there significant differences in the relationships between decentralized party organization and inclusive local participation in decision making in your Party? Where: Strongly Agree (SA), Agree (A), Neutral (N), Disagree (D) and Strongly Disagree (SD) [8. Strong national party leadership’s control of Chapters/Branches enhances greater members participation in party affairs]	Are there significant differences in the relationships between decentralized party organization and inclusive local participation in decision making in your Party? Where: Strongly Agree (SA), Agree (A), Neutral (N), Disagree (D) and Strongly Disagree (SD) [9. My party (from Ward to zonal levels) organizes congresses and primaries at various levels, without interference from the national leadershi…	How does the level of decentralization of party structures enhance their ideologies in Nigeria ? Where: Strongly Agree (SA), Agree (A), Neutral (N), Disagree (D) and Strongly Disagree (SD) [1. My party has a training institute where its policies and programs are developed]	How does the level of decentralization of party structures enhance their ideologies in Nigeria ? Where: Strongly Agree (SA), Agree (A), Neutral (N), Disagree (D) and Strongly Disagree (SD) [2. I know my parties ideologies policies and programs]	How does the level of decentralization of party structures enhance their ideologies in Nigeria ? Where: Strongly Agree (SA), Agree (A), Neutral (N), Disagree (D) and Strongly Disagree (SD) [3. I believe in the ideologies and work to achieve the policies and programs of my party. ]	How does the level of decentralization of party structures enhance their ideologies in Nigeria ? Where: Strongly Agree (SA), Agree (A), Neutral (N), Disagree (D) and Strongly Disagree (SD) [4. National ,zonal and state leaders are trained at the institute]	How does the level of decentralization of party structures enhance their ideologies in Nigeria ? Where: Strongly Agree (SA), Agree (A), Neutral (N), Disagree (D) and Strongly Disagree (SD) [5. Party Chapter/Branches train and inculcate in members its policies and programs.]	How does decentralized organizational structure impact on the membership stability of your Party? Where: Strongly Agree (SA), Agree (A), Neutral (N), Disagree (D) and Strongly Disagree (SD) [6. My party allows individual members opinion in reaching decisions]	How does the level of decentralization of party structures enhance their ideologies in Nigeria ? Where: Strongly Agree (SA), Agree (A), Neutral (N), Disagree (D) and Strongly Disagree (SD) [6. Effective distribution of power among party chapters and branches promotes understanding of party ideologies, policies and programs]	How does decentralized organizational structure impact on the membership stability of your Party? Where: Strongly Agree (SA), Agree (A), Neutral (N), Disagree (D) and Strongly Disagree (SD) [Row 13]	How does decentralized organizational structure impact on the membership stability of your Party? Where: Strongly Agree (SA), Agree (A), Neutral (N), Disagree (D) and Strongly Disagree (SD) [Row 13]
2024-04-28 20:23:52	56-65	Male	HND/BSC/(FIRST DEGREE)	SW	Lagos	Lagos Island	D2	Yes	PDP	16+ yrs	No	None		Yes	No		No		Yes	Boards	SA	SA	A	A	SA	A	SA	SA	A	A	SA	SA	A	A	A	A	SA	SA	SA	A	N	SA	SA	SA	SA
2024-04-28 20:41:48	46-55	Male	POSTGRADUATE	SE	Anambra	Awka South	Awka Ward 111	Yes	PDP	16+ yrs	No	N/A		No	No		No		Yes	Committee Chairman and Secretary respectively	SA	SA	A	SA	SA	A	A	SA	SA	N	SA	SA	A	A	A	A	SA	SA	A	N	A	SA	SA	SA	SA
2024-04-29 15:55:12	36-45	Male	POSTGRADUATE	SE	Anambra	Ayamelum Local Government Area	Omor 1	Yes	PDP	6-10 yrs	Yes	APGA	Factionalization, Non Inclusion in Decision-making, Imposition of Candidates, Hijack of Party Structure	Yes	No	State Executive	Yes	State Assembly	Yes	Adviser/Assistant	SA	SD	SD	SA	SA	D	SA	SA	SA	A	SA	SA	SD	A	SA	SD	SA	SA	SD	SD	D	D	D	SA	D
2024-04-29 16:27:47	46-55	Male	POSTGRADUATE	SE	Anambra	Ogbaru	Atani ward 1	Yes	PDP	6-10 yrs	No				No		No		No		SA											D	D	D	D	D	D	D	D	D	D	D	D	D	D
2024-04-29 16:32:34	46-55	Male	HND/BSC/(FIRST DEGREE)	SS	Edo	Etsako Central		Yes	PDP	16+ yrs	No				No		No		Yes	Electoral officer	SA	SA	SA	A	SA	SA	SA	SA	A	SA	SA	SA	D	D	A	SA	N	A	SA	D	SA	SA	SA	SA	SA
2024-04-29 16:40:46	36-45	Male	HND/BSC/(FIRST DEGREE)	SE	Anambra	Anambra-West	Umueze Anam Ward 2	Yes	APC	1-5 yrs	Yes	APGA	Non Inclusion in Decision-making		Yes	LG Executive	No		No		SA	A	A	N	SA	N	SA	SA	SA	N	N	SA	D	D	D	D	SA	D	N	SD	D	D	A	D	SD
2024-04-30 05:06:14	36-45	Male	HND/BSC/(FIRST DEGREE)	NC	Nasarawa	Keana	MADAKI	Yes	PDP	16+ yrs	No				Yes	LG Executive	Yes	Ward Councilor	Yes	Adviser/Assistant	SA	SA	SA	A	SA	SD	A	A	SA	SD	SA	SD	SD	SD	D	D	D	SD	SD	D	SA	SA	SA	A	SA	SA	SA
2024-04-30 05:36:29	56-65	Male	POSTGRADUATE	SE	Anambra	Ekwusigo	2	No									No
2024-04-30 05:46:06	46-55	Male	POSTGRADUATE	SE	Anambra	Ayamelum	Umerum	Yes	PDP	16+ yrs	No				No		Yes	State Assembly	Yes	Chairman	SA	SA	SA	SA	SA	N	A	SA	A	A	A	A	SD	SD	SD	N	A	SD	SD	SD	D	D	SD	SD	N	N	N
2024-04-30 06:07:04	36-45	Male	POSTGRADUATE	SE	Anambra	Aguata	Umuchu ward 2	No	PDP	11-15 yrs	Yes		Imposition of Candidates		Yes	Ward Executive	No		No		SA	SA	D	SD	SA	D	N	SA	SA	SD	A		D	N	D	N	A	A	SD	A	SD	N	N	N	D	SD	D
2024-04-30 07:54:12	46-55	Female	HND/BSC/(FIRST DEGREE)	SS	Delta	Aniocha North	Onicha Olona	Yes	APC	6-10 yrs	Yes	PDP	Factionalization, Non Inclusion in Decision-making, Imposition of Candidates, Hijack of Party Structure		Yes	LG Executive	Yes	State Assembly	Yes	Cabinet/Exco	SA	D	SD	SA	SA	D	SA	SA	SA	SD	SA	SA	SD	SD	SD	SD	SA	SA	SD	SD	D	N	D	D	D	SD	SA
2024-04-30 13:25:47	36-45	Male	HND/BSC/(FIRST DEGREE)	NC	Nasarawa	Lafia	Lafia	Yes	PDP	16+ yrs	No	PDP			No		No		No		SA	SA	SA	SA	SA	SA	SA	SA	A	A	SA	SA	SA	SA	SA	SA	D	SA	SA	SA	SA	SA	SA	A	A	SA	SA
2024-04-30 14:56:30	46-55	Female	POSTGRADUATE	NW	Kaduna	Kaduna South	Barnawa 1	Yes	PDP	16+ yrs	No				Yes	National Executive	No		No		SA	SA	A	A	SA	SA	SA	A	SA	A	A	SA	D	N	D	N	A	A	A	SA	A	A	A	N	N	N	SA
2024-04-30 17:34:34	56-65		POSTGRADUATE	NC	Plateau	Jos North	Naraguta A	Yes	PDP	16+ yrs	No				No				Yes	Adviser/Assistant	SA	SA	SA	A	SA	N	N	A	SA	A	A	SA	N	A	N	N	SA	A	N	SA	SA	A	A	A	N	A	A
2024-05-01 08:32:43	56-65	Male	HND/BSC/(FIRST DEGREE)	SS	Delta	Patani	one	Yes	PDP	6-10 yrs		APC	Factionalization		Yes	Ward Executive	No		Yes	Adviser/Assistant	D	SA	SA	A	A	D	A	SA	SA	SA	D	A	D	A	D	A	SA	A	SA	D	SD	D	D	SD	SD	D	N
2024-05-01 13:18:14	46-55	Male	HND/BSC/(FIRST DEGREE)	NW	Kaduna	Jema'a	Kagoma	Yes	PDP	16+ yrs	No				No		No		Yes	Adviser/Assistant	SA	A	A	SA	A	N	N	N	A	A	A	N	D	A	N	N	A	A	N	D	D	N	N	D	N	N	SA
2024-05-01 19:53:58	66 and above	Male	POSTGRADUATE	SW	Lagos	Lagos Mainland	Ward K.	Yes	PDP	16+ yrs	Yes	APC			No		No		No		SA	A	A	SA	SA	N	SA	SA	SA	SD	SA	SA	SD	A	D	D	SA	SA	SD	SA	SA	SA	SA	SA	A	D	SA
2024-05-01 23:15:33	26-35	Male	POSTGRADUATE	SE	Anambra	Awka South	Amawbia 2	Yes	PDP	6-10 yrs	No	ZLP	Imposition of Candidates		Yes	State Executive	No		No		SA	SA	SA	A	SA	N	N	A	SA	N	SD	A	SD	N	N	SD	SA	N	A	N	SA	SA	SA	N	N	N	N
2024-05-02 18:40:30	56-65	Male	POSTGRADUATE	NW	Kaduna	Zaria LG	Kwarbai A	Yes	PDP	16+ yrs	Yes	Labour Party	Hijack of Party Structure		Yes	National Executive	No		Yes	Adviser/Assistant	SD	D	D	D	SA	D	SA	SA	A	N	SA	SA	D	N	N	N	N	SA	N	N	D	N	D	D	A	N	SA
2024-05-03 03:12:31	26-35	Male	POSTGRADUATE	SE	Anambra	Anaocha	Aguluzigbo ward 1	Yes		6-10 yrs	No				No						SA	SA	A	A	SA	N	D	N	N	D	A	A	D	N	D	N	N	A	D	D	D	N	A	D	N	D	A
2024-05-03 13:10:48	36-45	Male	POSTGRADUATE	NC	Nasarawa	KEANA	IWAGU	Yes	PDP	16+ yrs	No				No		No				SA	SA	SA	SA	SA	SA	SA	SA	SA	A	SA	SA	SA	SA	SA	SA	A	A	SA	SA	SA	SA	SA	A	SA	SA	SA
2024-05-03 14:04:18	46-55	Male	HND/BSC/(FIRST DEGREE)	NC	Nasarawa	Doma LGA	Galadima Ward	Yes	PDP	16+ yrs	No				Yes	LG Executive	No		No		SA	SA	SA	SA	SA	SA	A	SA	SA	A	SA	SA	D	A	SA	SA	D	A	D	A	A	SA	SA	A	N	A	A
2024-05-03 14:14:31	36-45	Male	HND/BSC/(FIRST DEGREE)	NC	Nasarawa	Keana local government	Obene Ward	Yes	PDP	16+ yrs	No				Yes	Ward Executive					SA	SA	SA		SA	SA	A	A	A	A	SA	A	A	SA	SA	A	A	SA	SA	SA	A	SA	SA	A	A	SA	SA
2024-05-03 14:37:40	56-65	Male	HND/BSC/(FIRST DEGREE)	NC	Nasarawa	Awe	Tunga	Yes	PDP	16+ yrs	No				Yes	State Executive	No		No		SA	SA	SA	A	SA	SA	A	SA	SA	SA	SA	SA	SA	SA	SA	SA	SA	SA	SA	SA	SA	SA	SA	A	A	SA	SA
2024-05-03 15:07:34	36-45	Male	WAEC/NECO	NC	Nasarawa	Toto	Ugya	Yes	PDP	16+ yrs	No				No		No		No
2024-05-03 15:46:39	46-55	Male	POSTGRADUATE	NC	Nasarawa	Doma	Agbashi	Yes	PDP	6-10 yrs	Yes	APGA	Imposition of Candidates		No		No		No		SA	SA	SA	A	SA	SA	A	A	SA	A	A	A	N	A	SA	SA	SD	SA	SA	A	N	A	A	N	A	A	SA
2024-05-04 00:21:53	56-65	Female	POSTGRADUATE	NW	Kaduna	SANGA	NINZO NORTH WARD	Yes	PDP	16+ yrs	Yes		Imposition of Candidates		Yes	State Executive	Yes	State Assembly	Yes	Cabinet/Exco		A	A	A	SA	A	N	N	A	A		SA	SA	A	A	SA	A	N	N	A	N	A	A	N	N	A	A
2024-05-04 11:39:21	46-55	Male	POSTGRADUATE	SS	Delta	Ndokwa West	Ward 3	Yes	PDP	16+ yrs	No				Yes	State Executive	No		Yes	Adviser/Assistant	SA	SA	SA	SA	A	SA	N	N	N	D	A	N	SA	A	A	A	SD	SD	D	D	SA	SA	SA	A	A	A	A
2024-05-05 07:47:34	46-55	Male	POSTGRADUATE	SE	Imo	Aboh Mbaise	Uvuru 1	Yes	PDP	16+ yrs	Yes	Anpp	Hijack of Party Structure		Yes	State Executive	No		Yes	Adviser/Assistant	A	A	D	D	A	D	A	A	A	D	D	D	D	D	A	D	D	D	D	D	D	A	A	N	D	D	D
2024-05-05 10:37:22	56-65	Male	WAEC/NECO	NC	Nasarawa	Keana	Kwara	Yes	PDP	16+ yrs	No	PDP			Yes	Ward Executive	No		Yes	Cabinet/Exco	SA	SA	SA	SA	SA	SA	SA	SA	SA	SA	SA	SA	SA	SA	SA	SA	SA	SA	SA	SA	SA	SA	SA	SA	SA	SA	SA
2024-05-06 10:12:46	36-45	Male	POSTGRADUATE	NC	Nasarawa	Wamba	Wayo	Yes	PDP	11-15 yrs	No				No		No		No		SA	SA	SA	SA	SA	N	N	N	A	N	N	D	D	N	A	N	D	N	N	D	SD	A	SA	SD	SD	N	N
2024-05-06 18:05:46	36-45	Male	POSTGRADUATE	NC	Nasarawa	Keana	Kadarko	Yes	PDP	11-15 yrs	No				Yes	Ward Executive	No		Yes	Cabinet/Exco	SA	SA	A	SA	SA	A	A	A	A	SA	SA	SA	A	A	SA	SA	A	SA	SA	A	D	SA	SA	D	SD	SA	SA
2024-05-06 18:07:22	46-55	Male	POSTGRADUATE	NC	Nasarawa	Keana	Giza Galadima	Yes	PDP	16+ yrs	No				Yes	Zonal Executive	No		No		SA	A	SA	SA	SA	SA	SA	SA	SA	SD	SA	SA	SA	SA	A	A	SA	A	A	SA	N	N	A	N	N	SA	A
2024-05-06 19:26:23	46-55	Female	HND/BSC/(FIRST DEGREE)	NC	Nasarawa	Doma	Galadima ward Doma	Yes	PDP	16+ yrs	No				Yes	State Executive	Yes	Ward Councilor	No		SA	SA	SA	SA	SA	SA	A	A	A	SA	SA	A	A	SA	A	A		SA	SA	SA	A	A	A	N	A	SA	A
2024-05-06 19:59:47	46-55	Male	HND/BSC/(FIRST DEGREE)	NC	Nasarawa	Akwanga	Andaha	Yes	PDP	16+ yrs	No				Yes	LG Executive	No		No		SA	SA	SA	SA	SA	A	SA	A	A	A	SA	A	A	A	A	SA	A	SA		SA	A	SA	SA	N	SA	SA	SA
2024-05-06 21:15:23	46-55	Male	HND/BSC/(FIRST DEGREE)	NC	Nasarawa	Obi	Kyakale	Yes	PDP	16+ yrs	No				Yes	LG Executive	No		No		SA	SA	SA	SA	SA	A	SA	A	SA	SA	SA	SA	D	N	A	N	SA	D	SD	A	A	SA	SA	A	SA	SA	SA
2024-05-06 21:16:21	36-45	Male	POSTGRADUATE	NC	Nasarawa	Nasarawa Eggon LGA	Agunji/Ogbagi	No							Yes	Zonal Executive	No		No		D	D	D	D	N	A	N	N	A	D	SA	SA	SA	SA	SA	SA	SA	SA	SA	SA	D	N	N	N	N	N	N
2024-05-07 07:01:03	26-35	Male	HND/BSC/(FIRST DEGREE)	NC	Nasarawa	Keana LGA	Kadarko	Yes	PDP	16+ yrs	No				Yes	State Executive	No		No		A	SA	SA	A	SA	SA	SA	SA	SA	SA	SA	SA	A	SA	SA	A	SA	A	SA	SA	A	SA	SA	A	A	A	SA
2024-05-07 08:54:57	46-55	Male	HND/BSC/(FIRST DEGREE)	NC	Nasarawa	Toto	Shafa kwotto	Yes	PDP	16+ yrs	No	PDP			Yes	LG Executive	No		Yes	Adviser/Assistant	SA	SA	SA	SA	SA	SA	SA	A	SA	SA	SA	SA	SA	SA	SA	SA	SA	SA	SA	SA	SA	SA	SA	SA	SA	SA	SA
2024-05-07 14:59:29	36-45	Male	HND/BSC/(FIRST DEGREE)	NC	Nasarawa	Lafia	Assakio	Yes	PDP	16+ yrs	No				No		Yes	State Assembly			SA	SA	SA	A	A	A	SA	SA	A	SA	SA	A	A	A	A	A	A	A	A	SA	SA	SA	A	SA	A	A	A
2024-05-07 17:06:14	66 and above	Male	NCE/ND/TCII	NW	Nasarawa	KEANA	Madaki	Yes	PDP	16+ yrs	No				Yes	LG Executive	Yes	Ward Councilor	No		SA	SA	SA	A	SA	A		A	A	A	A					SA	A	A		A		SA	SA			A	SA
2024-05-07 18:22:57	36-45	Male	HND/BSC/(FIRST DEGREE)	NC	Nasarawa	Lafia	Assakio	Yes	PDP	16+ yrs	No				Yes	Ward Executive	No		Yes		SA	SA	SA	SA	SA	SA	SA	SA	SA	SA	SA	SA	SA	SA	SA	SA	SA	SA	SA	SA	SA	SA	SA	SA	SA	SA	SA
2024-05-07 18:26:26	36-45	Male	HND/BSC/(FIRST DEGREE)	NC	Nasarawa	Obi	Agwatashi	Yes	PDP	16+ yrs	No				No		No		No		SA	SA	SA	SA	SA	SA	A	SA	SA	SA	SA	SA	SA	SA	A	SA	A		SA	A	SA	N	SA	A	SA	SA	SA
2024-05-09 10:21:18	46-55	Male	HND/BSC/(FIRST DEGREE)	NE	Adamawa	Hong	Bangshika	Yes	PDP	16+ yrs	No				Yes	State Executive	No		Yes	Adviser/Assistant	SA	A	N	A	A	A	N	A	SA	A	A	A	N	SA	N	SA	A	N	D	SA	N	A	SA	N	D	A	N
2024-05-09 14:55:09					Adamawa	Jada	Jada 1	Yes	PDP	16+ yrs	No				Yes	State Executive	No		Yes	Cabinet/Exco	SA	SA	SA	SA	SA	SA	SA	SA	SA	SA	SA	A	A	A	A	SA	A	SA	SA	SA	A	A	A	A	A	SA	A
2024-05-09 16:05:59	36-45	Female	POSTGRADUATE	SS	Delta	UDU	Ward 4	Yes	PDP	11-15 yrs	No				Yes	State Executive	No		Yes	Special Assistant, senior special Assistant	SA	SA	SA	A	SA	A	A	SA	A	A	A	SA	A	A	A	A	A	A	A	A	N	A	A	N	A	A	A
2024-05-11 13:04:00	56-65	Male	POSTGRADUATE	NE	Adamawa	Song	Sigire song	Yes		16+ yrs	No				Yes	State Executive	No		Yes	Adviser/Assistant
2024-05-11 13:04:39
2024-05-11 21:34:38	36-45	Male	HND/BSC/(FIRST DEGREE)	NE	Adamawa	Song	Dirma	Yes	PDP	16+ yrs	Yes	ACN	Imposition of Candidates		No		No		Yes	SSA	SA	SA	SA	A	SA		N	A	SA	SA	A	A	A	SA	A	A	N	SA	SA	A	SA	SA	SA	A	A	A	SA
2024-05-12 14:11:04	46-55	Male	POSTGRADUATE	SW	Lagos	Oshodi Isolo	Mafoluku Ward	Yes	PDP	16+ yrs	Yes	AD Alliance For Democracy	Hijack of Party Structure		Yes	LG Executive	Yes	State Assembly	Yes	National Delegate	SA	D	SD	A	D	N	N	A	SA	A	D	SA	SD	SD	SA	D	D	D	SA	SD	SA	A	A	N	N	SD	SA
2024-05-12 17:12:55	36-45	Male	HND/BSC/(FIRST DEGREE)	SW	Lagos	Oshodi	Ewu ward	Yes	PDP	11-15 yrs	No				No		No		No		SA	SA	SA	SA	SA	SA	A	SA	SA	SA	SA	SA	A	SA	SA	SA	A	SA	A	SA	A	SA	SA	A	A	SA	SA
2024-05-12 17:17:12	56-65	Male	POSTGRADUATE	SW	Lagos	Lagos Island	Ward F2, Ilasamaja	Yes	PDP	11-15 yrs	Yes	APC	Imposition of Candidates		No		No		Yes	National Campaign council	SA	SA	SA	SA	SA	SA	A	SA	SA	SA	SA	SD	SA	SA	A	A	SA	A	SA	SD	SA	SA	SA	SD	A	A	SA
2024-05-12 17:45:59	46-55	Male	HND/BSC/(FIRST DEGREE)	SW	Lagos	Ojo	Yaba/Ojuelegba in Surulere, Lagos	Yes	PDP	16+ yrs	No				Yes	State Executive	No		No		SA	SA	SD	SA	SA	D	SA	SA	N	D	SA	SA	SD	SA	A	SD	SA	SD	SA	SA	SA	SA	SA	SA	SA	SD	SA
2024-05-12 17:55:04	36-45	Female	NCE/ND/TCII	SW	Ogun	Owode	Owede ward 7	Yes	APC	11-15 yrs	Yes	PDP	Hijack of Party Structure			LG Executive	Yes	State Assembly	Yes	Cabinet/Exco	SA	D	A	SA	SA	SD	SD	A	SA	SA	SD	SA	SD	D	SA	SD	SD	SA	SA	SD	N	A	A	N	N	A	SA
2024-05-12 21:51:28	46-55	Male	NCE/ND/TCII	NE	Adamawa	Mubi south	Gella ward	Yes	PDP	16+ yrs	No				Yes	Zonal Executive	Yes	Ward Councilor	Yes	Adviser/Assistant	SA	SA	SA	SA	SA	SA	SA	SA	A	SA	SA	SA	SA	SA	SA	SA	SA	SA	SA	A	SA	SA	SA	A	A	SA	SA
2024-05-12 23:53:58	46-55	Male	HND/BSC/(FIRST DEGREE)	SE	Enugu	Awgu	C	Yes	PDP	16+ yrs	No				Yes	State Executive	Yes	Ward Councilor	No		SA	A	A	SA	SA	D	D	D	SD	D	SA	A	N	N	N	A	SA	A	N	N	N	D	D	N	A	D	SA
2024-05-13 01:07:41	46-55	Male	HND/BSC/(FIRST DEGREE)	SW	Ondo	Ilaje	Ward E	Yes	PDP	6-10 yrs	No				Yes	Ward Executive	No		No		A	A	D	A	SA	SD	A	A	SA	N	A	A	D	A	SD	N	SA	A	SD	SD	SA	A	A	N	D	A	A
2024-05-13 05:57:49	46-55	Male	HND/BSC/(FIRST DEGREE)	NE	Adamawa	Girei	Girei 1	Yes	PDP	16+ yrs	Yes	AC/ACN	Hijack of Party Structure		No		No		No		SA	SA	SA	SA	SA	SA	A	SA	SA	SA	SA	SA	A	A	A	SA	SA	A	SA	A	SA	A	A	A	A	A	SA
2024-05-13 06:42:21	46-55	Male	HND/BSC/(FIRST DEGREE)	NC	Adamawa	Toungo	Toungo 1	Yes	PDP	16+ yrs	No				No		Yes	State Assembly			SA	SA	SA	SA	SA	SA		SA	SA		SA	SA	SA	SA	SA	SA	SA	SA	A	A	SA	SA	SA	SA	A	SA	A
2024-05-13 10:56:13	56-65	Male	HND/BSC/(FIRST DEGREE)	SW	Ogun	Abeokuta North	Atobaje Ward, Agege, Lagos	Yes	PDP	16+ yrs	Yes	PDP	Hijack of Party Structure		Yes	LG Executive	No		No		SA	SA	A	SA	SA	D	A	SA	SA	D	SA	A	SD	A	SD	A	SA	D	D	SD	A	SA	SA	SD	D	D	SA
2024-05-13 14:09:40	56-65	Male	POSTGRADUATE	SW	Lagos	Epe	J1	Yes	PDP	16+ yrs	No				Yes	State Executive	No		Yes	Lagos East coordinator for Sure-P	A		SA	A	SA	A	A	A	SA	SA	A	A	N	A	A	A	N	A	N	A	A	SA	SA	N	N	A	A
2024-05-13 16:23:29	56-65	Male	POSTGRADUATE	SW	Ogun	Abeokuta north	Ward di	Yes	PDP	11-15 yrs	Yes	AD	Factionalization		Yes	LG Executive	Yes	MFR	No		SA	SA	A	A	A	A	A	A	N	A	A	A	N	A	A	A	N	A	N	N	A	A	A	N	A	A	A
2024-05-13 16:26:52	46-55	Male	HND/BSC/(FIRST DEGREE)	SW	Ondo	Ilaje local government	Ward j	Yes	PDP	16+ yrs	No				Yes	State Executive					SA	A	SA	SA	SA	SA	SA	SA	A	A	A	A	A	SA	A	SA	A	A	SA	SA	A	A	SA	SD	D	SA	SD
2024-05-14 12:15:44	56-65	Male	POSTGRADUATE	SW	Lagos	Epe	A4	Yes	PDP	16+ yrs	No				No		No		No		SA	A	N	N	A	N	D	SA	N	D	D	SA	D	D	N	N	A	SD	SD	N	D	SA	SA	SD	SD	D	N
2024-05-14 16:53:35	56-65	Male	HND/BSC/(FIRST DEGREE)	NE	Adamawa	Demsa	Borrong	Yes	PDP	1-5 yrs	No				No		No		Yes	Adviser/Assistant	SA	SA	A	SA	A	N	D	A	A	A	A	N	D	A	A	SD	SD	N	SD	N	A	A	A	N	D	D	D
2024-05-14 19:16:00	56-65	Male	POSTGRADUATE	SW	Lagos	Lagos Island	Langbasa	Yes	PDP	16+ yrs	No				Yes	State Executive	No		No		SA	D	N	SA	SA	SA	SA	A	SA	D	A	N	SD	N	N	A	A	A	N	SD	SA	SA	SA	A	N	N	A
2024-05-15 08:00:02	46-55	Female	NCE/ND/TCII	NE	Adamawa	LAMURDE LOCAL GOVERNMENT.	GYAWANA .	Yes	PDP	16+ yrs	No				Yes	LG Executive	No		Yes	VICE CHAIRMAN TRANSITION COMMITTEE.	SA	SA	SA	A	SA	A	A	A	SA	SA	A	A		A	A	A	A	A	A	A	A	A	SA	A	A	SA	A
2024-05-15 20:44:28	36-45	Female	NCE/ND/TCII	SS	Delta	Aniocha North	Onicha Ugbo	Yes	PDP	1-5 yrs	Yes	APC	Non Inclusion in Decision-making, Imposition of Candidates, Hijack of Party Structure		Yes	LG Executive	No		Yes	Adviser/Assistant	SA	SA	D	A	SA	N	A	SA	SA	SD	A	SA	D	D	D	D	A	A	SD	D	A	A	N	A	D	D	A
2024-05-15 21:19:36	66 and above	Male	POSTGRADUATE	SW	Lagos	Badagry	Ward E	Yes	PDP	16+ yrs	No				Yes		Yes		Yes	Boards	SA	SA	A	SA	A	A	A	A	A	A	SA	A	D	A	A	SA	SA	A	N	A	A	SA	A	N	A	A	A
2024-05-15 21:48:42	56-65	Male	POSTGRADUATE	NC	Nasarawa	Akwanga	Gwanje Gwanje	Yes	PDP	11-15 yrs	No				Yes	National Executive	Yes	MFR	Yes	Cabinet/Exco	SA	SA	A	N	D	A	SA	SA	A	A	D	D	A	A	A	A	D	D	A	A	SA	SA	SA	SA	A	A	D
2024-05-15 21:58:05	46-55	Female	POSTGRADUATE	NC	Nasarawa	Keffi	Angwan Iya 1	Yes	PDP	6-10 yrs	Yes	APC	Non Inclusion in Decision-making, Imposition of Candidates, Hijack of Party Structure		Yes	Zonal Executive	Yes	State Assembly	Yes	Boards	SA	SA	D	SA	SA	A	A	SA	SA	D	A	A	D	D	A	A	SA	SA	SD	D	SA	A	A	A	N	D	A
2024-05-15 22:05:09	36-45	Female	NCE/ND/TCII	NC	Nasarawa	Karu	Karshi 1	Yes	PDP	6-10 yrs	No				No		Yes	Ward Councilor	No		SA	D	SD	SA	SA	D	A	SA	SA	SD	A	SA	D	A	A	A	SA	A	SD	D	SA	N	N	A	D	D	A
2024-05-15 22:17:25	46-55	Female	WAEC/NECO	NC	Nasarawa	Lafia	Assakio	Yes	PDP	6-10 yrs	Yes	APC	Non Inclusion in Decision-making, Imposition of Candidates, Hijack of Party Structure		No		No		No		SA	A	SD	A	SA	D	A	SA	SA	SD	A	SA	D	A	A	D	SA	A	D	D	SA	A	A	A	N	D	A
2024-05-15 22:29:57	26-35	Female	HND/BSC/(FIRST DEGREE)	NC	Nasarawa	Nasarawa Egon	Agwuji/Ogbagi	Yes	PDP	6-10 yrs	No				Yes	Ward Executive	No		No		SA	A	D	A	SA	N	A	SA	SA	D	A	SA	D	A	A	A	SA	SA	SD	SD	A	A	N	N	D	D	A
2024-05-15 22:48:01	66 and above	Female	NCE/ND/TCII	NC	Nasarawa	Wamba	Wayo	Yes	PDP	16+ yrs	No				Yes	Ward Executive	No		Yes	Cabinet/Exco	SA	A	D	A	SA	N	A	SA	SA	SD	A	SA	D	D	D	D	A	A	SD	D	A	A	A	A	D	D	A
2024-05-17 18:45:10	46-55	Male	POSTGRADUATE	NC	Nasarawa	Awe	Tunga	Yes	PDP	6-10 yrs	Yes	APC	Imposition of Candidates, Hijack of Party Structure		No		Yes	MFR			SA	A	D	SA	SA	A	A	SA	SA	D	N	SA	D	D	D	D	A	A	D	D	SA	SA	SA	A	N	N	A
2024-05-17 18:51:32	46-55	Female	HND/BSC/(FIRST DEGREE)	SS	Delta	Aniocha North	Isselle Uku 1	Yes	PDP	11-15 yrs	No				Yes	State Executive	No				SA	A	D	A	SA	A	SA	SA	SA	D	A	SA	D	A	A	A	A	A	D	D	SA	A	A	SA	N	D	A
2024-05-17 18:57:26	36-45	Male	POSTGRADUATE	SS	Delta	Bomadi	Akugbene 11	Yes	PDP	6-10 yrs	No				Yes	State Executive	No				SA	A	D	A	SA	A	SA	SA	SA	SD	A	SA	D	D	D	SD	A	A	SD	D	SA	A	A	A	N	D	A
2024-05-17 19:10:31	56-65	Male	POSTGRADUATE	SS	Delta	Ethiope East	Agbona 111	Yes	APC	6-10 yrs	Yes	PDP	Hijack of Party Structure		Yes	LG Executive	No				SA	A	D	A	SA	A	A	A	SA	D	A	A	D	D	D	D	SA	A	SD	D	D	A	A	D	D	D	A
2024-05-17 19:17:06	36-45	Female	HND/BSC/(FIRST DEGREE)	SS	Delta	Ika North East	Ovia 11	Yes	APC	6-10 yrs	Yes	PDP	Non Inclusion in Decision-making		Yes	State Executive	No				SA	A	D	A	SA	A	A	SA	SA	D	A	A	D	D	D	D	A	A	D	D	D	A	N	D	N	D	A
2024-05-17 19:23:55	56-65	Male	WAEC/NECO	SS	Delta	Ethiope West	Jesse 11	Yes	APC	6-10 yrs	No				Yes	State Executive	No		No		SA	A	D	A	SA	A	A	SA	SA	D	A	SA	D	D	D	D	A	A	SD	SD	D	A	A	SD	D	D	A
2024-05-17 19:29:51	46-55	Female	HND/BSC/(FIRST DEGREE)	SS	Delta	Ika South	Agbor 11	Yes	APC	6-10 yrs	No				Yes	State Executive	No				SA	A	D	A	SA	A	A	SA	SA	D	A	SA	D	D	D	D	A	A	D	D	D	N	N	D	D	D	A
2024-05-17 19:36:12	26-35	Male	HND/BSC/(FIRST DEGREE)	SS	Delta	Ndokwa West	Abbi 1	Yes	APC	1-5 yrs	No				Yes	Ward Executive	No		No		SA	A	D	A	SA	N	A	SA	SA	D	A	SA	D	D	D	D	A	A	SD	SD	D	N	N	SD	SD	D	A
2024-05-17 19:42:38	36-45	Male	HND/BSC/(FIRST DEGREE)	SS	Delta	Udu	Aladja	Yes	APC	6-10 yrs	No				Yes	LG Executive	No		No		SA	A	D	A	SA	N	A	SA	SA	D	A	SA	D	D	D	D	A	A	D	SD	D	N	N	D	N	D	A
2024-05-17 19:48:45	18-25	Male	WAEC/NECO	SS	Delta	Ndokwa West	Ogume 1	Yes	APC	1-5 yrs	No				Yes	Ward Executive	No		No		SA	A	SD	A	SA	N	A	SA	SA	D	A	SA	D	D	D	D	A	A	SD	D	SD	D	N	SD	D	D	A
2024-05-17 19:54:57	36-45	Male	HND/BSC/(FIRST DEGREE)	SS	Delta	Ughelli South	Ewu 11	Yes	PDP	6-10 yrs	No				No		Yes	Ward Councilor	No		SA	A	D	A	SA	N	A	SA	SA	D	A	A	D	D	D	D	A	A	SD	SD	A	A	A	A	A	D	A
2024-05-17 20:01:38	46-55	Female	NCE/ND/TCII	NC	Nasarawa	Keana	Iwagu	Yes	APC	1-5 yrs	Yes	PDP	Non Inclusion in Decision-making, Hijack of Party Structure		Yes	LG Executive	No		No		SA	A	D	A	SA	N	A	SA	SA	D	A	SA	D	D	D	D	A	A	D	D	SA	N	N	A	D	D	A
2024-05-17 20:09:50	46-55	Female	HND/BSC/(FIRST DEGREE)	SS	Delta	Warri South Weat	Oporoza	Yes	APC	6-10 yrs	No				No		No				SA	A	D	A	SA	N	A	SA	SA	D	A	A	D	D	D	D	A	A	D	D	D	N	N	N	D	D	A
2024-05-17 20:18:10	46-55	Male	NCE/ND/TCII	SS	Delta	Uvwie	Ekpan 1	Yes	APC	6-10 yrs	No				No		No		No		SA	A	D	A	SA	N	A	SA	SA	D	A	A	D	D	D	D	A	A	D	D	D	N	N	D	D	D	N
2024-05-18 09:38:20	36-45	Female	NCE/ND/TCII	NE	Adamawa	Fufore	Karlahi	Yes	APC	6-10 yrs	Yes	PDP	Imposition of Candidates, Hijack of Party Structure		Yes	State Executive	Yes	State Assembly	No		SA	A	D	A	SA	A	A	SA	SA	D	A	SA	N	D	D	D	A	A	D	D	D	N	N	D	D	D	A
2024-05-18 09:45:58	26-35	Male	WAEC/NECO	NE	Adamawa	Ganye	Yebbi	Yes	APC	1-5 yrs	No				Yes	Ward Executive	No				SA	D	D	A	SA	N	A	SA	SA	SD	A	A	N	D	D	D	SA	A	SD	D	D	N	N	D	D	SD	A
2024-05-18 10:00:52	46-55	Female	HND/BSC/(FIRST DEGREE)	SS	Delta	Oshimili North	Okpanam	Yes	PDP	11-15 yrs	No				No		Yes	State Assembly	Yes	Adviser/Assistant	SA	A	N	A		A	A	SA	SA	D	A	A	N	D	D	D	D	A	D	D	SA	A	A	A	A	SA	A
2024-05-18 10:29:29	56-65	Male	HND/BSC/(FIRST DEGREE)	SS	Delta	Aniocha South	Ubulu Uku	Yes	APC	6-10 yrs	Yes	PDP	Imposition of Candidates		No		Yes	State Assembly	Yes	Adviser/Assistant	SA	A	D	A	SA	A	A	SA	A	D	A	A	D	D	D	D	A	A	D	D	D	A	A	D	D	D	A
2024-05-18 10:34:28	36-45	Female	WAEC/NECO	SS	Delta	Ika South	Agbor 11	Yes	APC	6-10 yrs	No				No		No		No		SA	D	D	A	SA	N	A	SA	SA	D	A	A	N	D	D	D	SA	A	SD	SD	D	N	N	D	D	SD	A
2024-05-18 10:42:07	26-35	Female	HND/BSC/(FIRST DEGREE)	NE	Adamawa	Madagali	Wagga	Yes	APC	1-5 yrs	Yes	PDP	Non Inclusion in Decision-making, Imposition of Candidates		Yes	LG Executive	No		No		SA	A	D	A	SA	N	A	A	SA	D	A	SA	N	D	D	D	A	A	D	D	D	N	N	D	D	D	A
2024-05-18 10:49:06	66 and above	Male	POSTGRADUATE	NE	Adamawa	Michika	Bazza Margi	Yes	APC	6-10 yrs	Yes	ANPP			Yes	Zonal Executive	Yes	State Assembly	No		SA	A	D	A	SA	A	A	SA	SA	SD	A	A	N	D	D	D	A	A	D	D						D
2024-05-18 10:54:13	36-45	Female	NCE/ND/TCII	NE	Adamawa	Mubi North	Sabon Layi	Yes	APC	6-10 yrs	No				Yes	State Executive	No		No		SA	A	D	A	SA	N	A	SA	SA	D	A	A	N	D	D	D	SA	A	D	D	D	N	N	D	D	N	A
2024-05-18 11:01:28	36-45	Female	WAEC/NECO	NE	Adamawa	Hong	Garaha	Yes	APC	1-5 yrs	Yes	PDP	Imposition of Candidates		Yes	Ward Executive	No		No		SA	A	D	A	SA	N	A	SA	SA	D	A	A	N	D	D	D	A	A	SD	D	D	N	N	D	N	D	A
2024-05-18 11:18:01	56-65	Female	FSLC	NE	Adamawa	Fufore	Ribadu	Yes	PDP	11-15 yrs	No				Yes	State Executive	No		Yes	Adviser/Assistant	SA	A	D	A	SA	N	A	SA	SA	D	A	A	N	D	D	D	SA	A	SD	D	SA	A	A	A	A	N	A
2024-05-18 11:22:57	18-25	Female	NCE/ND/TCII	NE	Adamawa	Gombi	Yang	Yes	PDP	1-5 yrs	No				Yes	Ward Executive	No		No		SA	SA	N	A	SA	N	A	SA	SA	SD	A	A	N	N	D	D	A	A	D	SD	SA	N	N	A	N	N	A
2024-05-18 11:31:53	56-65	Female	FSLC	NE	Adamawa	Ganye	Yebbi	Yes	PDP	16+ yrs	No				Yes	State Executive	Yes	State Assembly	Yes	Cabinet/Exco	SA	A	D	A	SA	SA	A	SA	SA	D	A	A	A	D	D	D	A	A	SD	D	SA	A	A	SA	A	N	A
2024-05-18 11:50:23	36-45	Male	HND/BSC/(FIRST DEGREE)	NE	Adamawa	Demsa	Gwamba	Yes	APC	1-5 yrs	Yes	PDP	Non Inclusion in Decision-making, Imposition of Candidates		Yes	State Executive	No		No		SA	A	D	A	SA	A	A	SA	SA	D	A	A	N	D	D	D	SA	A	D	D	D	A	A	D	D	N	A
2024-05-18 11:55:12	46-55	Female	HND/BSC/(FIRST DEGREE)	NE	Adamawa	Jada	Yelli	Yes	APC	6-10 yrs	No				Yes	State Executive	No		No		SA	A	D	A	SA	A	A	SA	SA	D	A	A	N	D	D	D	SA	A	D	D	D	A	A	N	D	D	A
2024-05-18 12:00:40	36-45	Female	WAEC/NECO	NE	Adamawa	Girie	Damare	Yes	APC	6-10 yrs	No				Yes	LG Executive	No		No		SA	A	D	A	SA	A	A	SA	SA	D	A	A	N	D	D	D	A	A	D	D	D	A	A	D	N	D	A
2024-05-18 12:07:05	26-35	Female	NCE/ND/TCII	NE	Adamawa	Guyuk	Chikila	Yes	APC	6-10 yrs	No				Yes	LG Executive	No		No		SA	A	D	A	SA	A	A	SA	A	D	A	A	N	D	D	D	A	A	D	D	D	N	N	D	N	D	A
2024-05-18 12:18:05	56-65	Male	NCE/ND/TCII	NC	Nasarawa	Keffi	Gangare Tudu	Yes	APC	1-5 yrs	Yes	APGA	Imposition of Candidates, Hijack of Party Structure		Yes	LG Executive	No		No		SA	A	D	A	SA	N	A	SA	SA	D	A	A	N	D	D	D	A	A	D	D	D	N	N	D	D	D	A
2024-05-18 12:30:13	26-35	Male	WAEC/NECO	NE	Adamawa	Guyuk	Guyuk	Yes	APC	6-10 yrs	No				Yes	Ward Executive	No		No		SA	A	D	A	SA	N	A	SA	SA	D	A	A	D	D	D	D	A	A	D	D	D	N	N	N	N	D	A
2024-05-18 15:35:56	36-45	Female	WAEC/NECO	NC	Nasarawa	Doma	Agbashi	Yes	APC	6-10 yrs	No				Yes	Ward Executive	No		No		SA	N	D	A	SA	N	A	SA	SA	SD	A	A	D	D	D	D	SA	A	D	D	D	N	N	N	D	D	A
2024-05-18 15:42:04	36-45	Male	WAEC/NECO	NC	Nasarawa	Lafia	Assakio	Yes	APC	6-10 yrs	Yes	PDP	Imposition of Candidates, Hijack of Party Structure		Yes	LG Executive	No		Yes	Adviser/Assistant	SA	A	D	A	SA	N	A	SA	SA	D	A	A	D	D	D	D	SA	A	SD	SD	D	N	N	N	D	N	A
2024-05-18 15:51:22	46-55	Male	WAEC/NECO	NC	Nasarawa	Karu	Kokona	Yes	APC	6-10 yrs	No				Yes	LG Executive	No		No		SA	A	D	A	SA	N	A	SA	SA	SD	A	A	N	D	D	D	SA	A	SD	SD	D	A	N	N	D	D	A
2024-05-18 15:57:35	46-55	Male	HND/BSC/(FIRST DEGREE)	NC	Nasarawa	Wamba	Wayo	Yes	APC	1-5 yrs	No				No		No		No		SA	A	D	A	SA	A	A	SA	SA	D	A	A	N	SD	SD	D	SA	A	SD	SD	D	N	N	D	D	D	A
2024-05-18 16:07:13	18-25	Male	WAEC/NECO	NC	Nasarawa	Doma	Galadima	Yes	APC	1-5 yrs	No				No		No		No		SA	A	D	A	SA	N	A	SA	SA	D	A	A	N	D	D	D	SA	A	SD	SD	D	N	N	N	N	D	A
2024-05-18 16:11:59	36-45	Female	HND/BSC/(FIRST DEGREE)	NC	Nasarawa	Awe	Tunga	Yes	APC	6-10 yrs	No				Yes	Zonal Executive	No		Yes	Adviser/Assistant	SA	A	N	A	SA	A	A	SA	SA	D	A	SA	N	D	D	D	A	A	SD	D	N	A	A	N	N	N	A
2024-05-18 17:53:07	56-65	Male	HND/BSC/(FIRST DEGREE)	NC	Nasarawa	Lafia	Assakio	Yes	APC	6-10 yrs	Yes	ANPP	Factionalization, Hijack of Party Structure		Yes	National Executive	Yes	State Assembly	Yes	Cabinet/Exco	SA	SA	A	A	SA	SA	A	SA	A	A	N	D	A	N	A	A	D	A	A	A	N	SA	SA	D	A	A	A
2024-05-18 17:59:38	56-65	Male	POSTGRADUATE	NC	Nasarawa	Toto	Shaffa kwotto	Yes	PDP	16+ yrs	No				Yes	National Executive	Yes	State Assembly	Yes	Cabinet/Exco	SA	SA	A	N	SA	SD	A	SA	A	A	N	D	SA	A	A	A	D	A	A	A	SA	SA	SA	SA	A	A	A
2024-05-18 18:07:52	36-45	Female	WAEC/NECO	NC	Nasarawa	Obi	Agwatashi	Yes	APC	6-10 yrs	No				No		No		Yes	Adviser/Assistant	SA	A	D	A	SA	N	A	SA	SA	D	A	A	N	D	D	D	A	A	D	D	D	N	N	D	N	D	A
2024-05-18 18:16:55	46-55	Female	NCE/ND/TCII	NC	Nasarawa	Nasarawa Egon	Agwuji/ Pgbagi	Yes	APC	6-10 yrs	No				No		No		Yes	Boards	SA	A	D	A	SA	N	A	SA	SA	D	A	A	N	D	D	D	SA	A	D	D	D	N	N	N	D	N	A
2024-05-18 19:57:58	36-45	Female	HND/BSC/(FIRST DEGREE)	NC	Nasarawa	Keffi	Angwan Iya 1	Yes	PDP	11-15 yrs	No				Yes	State Executive	Yes	State Assembly	No		SA	A	N	A	SA	SA	A	SA	SA	D	A	SA	D	D	D	D	SA	A	D	D	SA	A	A	SA	A	N	A
2024-05-18 20:05:25	36-45	Female	NCE/ND/TCII	NC	Nasarawa	Akwanga	Andcha	Yes	APC	6-10 yrs	No				Yes	State Executive	No		Yes	Boards	SA	A	D	A	SA	A	A	SA	SA	D	A	A	N	D	D	D	SA	A	D	D	D	A	N	N	N	D	A
2024-05-18 20:14:35	26-35	Female	NCE/ND/TCII	NC	Nasarawa	Keffi	Gangare Tudu	Yes	APC	1-5 yrs	No				Yes	Ward Executive	No		No		SA	N	D	A	SA	N	A	SA	SA	D	A	SA	D	D	D	D	SA	A	D	D	N	N	N	N	D	D	A
2024-05-18 20:20:29	56-65	Female	POSTGRADUATE	NC	Nasarawa	Lafia	Nasarawa	Yes	APC	6-10 yrs	Yes	PDP	Imposition of Candidates, Hijack of Party Structure		No				Yes	Adviser/Assistant	SA	A	D	A	SA	A	A	SA	SA	D	A	A	N	D	D	D	A	A	D	D	N	A	A	N	N	D	A
2024-05-18 20:25:45	46-55	Male	HND/BSC/(FIRST DEGREE)	NC	Nasarawa	Keana	Iwagu	Yes	APC	6-10 yrs	No				No		No		No		SA	A	D	A	SA	N	A	SA	SA	D	N	A	D	D	D	D	A	A	D	D	N	N	N	N	D	D	A
2024-05-18 20:33:42	26-35	Male	WAEC/NECO	NE	Adamawa	Mubi South	Gella	Yes	PDP	1-5 yrs	Yes	APC	Imposition of Candidates, Hijack of Party Structure		Yes	Ward Executive	No		No		SA	A	D	A	SA	N	A	SA	SA	D	A	A	D	D	D	D	SA	A	D	D	A	N	N	A	N	D	A
2024-05-18 21:18:08	36-45	Male	WAEC/NECO	NE	Adamawa	Mayo Belwa	Binyeri	Yes	PDP	11-15 yrs	No				Yes	LG Executive	No		Yes	LGA Supervisor	SA	SA	D	A	SA	A	A	SA	SA	SD	A	SA	D	D	SD	D	A	A	SD	D	SA	A	N	A	N	N	A
2024-05-18 21:25:43	66 and above	Male	WAEC/NECO	NE	Adamawa	Maiha	Humbutudi	Yes	PDP	16+ yrs	No				Yes	Zonal Executive	Yes	MFR	Yes	Cabinet/Exco	SA	SA	D	A	SA	SA	A	SA	SA	D	A	A	N	D	SD	N	N	A	N	N	SA	A	A	SA	A	N	A
2024-05-18 21:34:31	56-65	Female	HND/BSC/(FIRST DEGREE)	NE	Adamawa	Michika	Bazza Margi	Yes	PDP	1-5 yrs	Yes	APC	Imposition of Candidates, Hijack of Party Structure		Yes	LG Executive	No		Yes	Adviser/Assistant	SA	A	D	A	SA	A	A	SA	SA	SD	A	A	D	D	SD	D	SA	A	D	D	SA	N	N	A	N	N	A
2024-05-18 21:48:07	26-35	Female	NCE/ND/TCII	NE	Adamawa	Yola North	Yelwa	Yes	PDP	6-10 yrs	No				Yes	Ward Executive	No		Yes	Supervisory Of Works	SA	A	D	SA	SA	A	A	SA	SA	D	A	A	D	D	D	A	A	A	D	D	SA	A	A	A	D	N	A
2024-05-19 04:29:53	36-45	Female	WAEC/NECO	NE	Adamawa	Song	Dirma	Yes	PDP	6-10 yrs	Yes	APC	Imposition of Candidates, Hijack of Party Structure		Yes	Ward Executive	No		Yes	LGA Supervisor	SA	A	D	A	SA	N	A	SA	SA	D	A	A	N	D	D	D	A	A	D	SD	A	A	A	A	N	D	A
2024-05-19 04:35:23	36-45	Male	HND/BSC/(FIRST DEGREE)	NE	Adamawa	Yola South	Mbamoi	Yes	APC	6-10 yrs	No				Yes	State Executive	No		No		SA	A	D	A	SA	A	A	SA	SA	D	A	A	N	N	N	N	A	A	D	D	D	A	A	N	N	D	A
2024-05-19 04:40:22	26-35	Female	NCE/ND/TCII	NE	Adamawa	Shelleng	Kiri	Yes	APC	6-10 yrs	No				Yes	LG Executive	No		No		SA	SA	D	A	SA	N	A	SA	SA	D	A	A	N	D	D	D	A	A	D	D	N	N	N	D	D	D	A
2024-05-19 04:44:45	26-35	Female	WAEC/NECO	NE	Adamawa	Numan	Numan 11	Yes	APC	1-5 yrs	No				Yes	Ward Executive	No		No		SA	SA	D	A	SA	N	A	SA	A	D	A	A	D	D	D	D	A	A	D	D	D	N	N	D	D	D	A
2024-05-19 04:49:29	56-65	Male	FSLC	NE	Adamawa	Shelleng	Kiri	Yes	APC	1-5 yrs	No				Yes	Ward Executive	No		No		SA	SA	D	A	SA	N	A	SA	SA	D	A	A	SD	SD	SD	SD	SA	A	SD	SD	D	N	N	D	D	D	A
2024-05-19 04:55:15	36-45	Female	FSLC	NE	Adamawa	Numan	Gamadio	Yes	APC	6-10 yrs	Yes	SDP	Imposition of Candidates, Hijack of Party Structure		No		No		No		SA	SA	D	A	SA	N	A	A	SA	D	A	A	N	N	N	N	A	A	D	SD	N	N	N	N	N	N	A
2024-05-19 05:05:17	36-45	Female	WAEC/NECO	NE	Adamawa	Mubi South	Dirb8shu/Gandira	Yes	PDP	6-10 yrs	No				No		No		Yes	Adviser/Assistant	SA	SA	D	A	SA	A	A	SA	SA	D	A	A	N	N	N	N	A	A	D	D	A	N	N	A	N	D	A
2024-05-19 07:51:56	18-25	Male	WAEC/NECO	NE	Adamawa	Demsa	Dong	Yes	APC	1-5 yrs	No				No		No				SA	SA	D	A	SA	N	A	SA	SA	SD	A	A	D	D	D	D	SA	A	SD	SD	D	N	N	D	N	SD	A
2024-05-19 07:56:31	46-55	Female	WAEC/NECO	NE	Adamawa	Ganye	Ganye 11	Yes	APC	6-10 yrs	No				No		No		No		SA	A	N	A	SA	N	A	SA	SA	D	A	A	D	D	SD	SD	SA	A	SD	SD	N	N	N	N	D	D	A
2024-05-19 08:01:32	36-45	Male	WAEC/NECO	NE	Adamawa	Gombi	Duwa	Yes	PDP	1-5 yrs	Yes	APC	Imposition of Candidates, Hijack of Party Structure		No		No		No		SA	SA	N	A	SA	N	A	SA	SA	D	A	SA	SD	D	D	D	SA	D	SD	SD	SA	N	N	A	N	D	A
2024-05-19 08:05:51	26-35	Male	WAEC/NECO	NE	Adamawa	Guyuk	Chikila	Yes	APC	1-5 yrs	No				No		No		No		SA	SA	D	A	SA	N	A	A	SA	SD	A	A	N	D	D	D	SA	A	SD	D	D	N	N	D	D	N	SA
2024-05-19 08:11:44	66 and above	Female	WAEC/NECO	NE	Adamawa	Mubi North	Digil	Yes	APC	6-10 yrs	Yes	PDP	Imposition of Candidates		No		Yes	Ward Councilor	Yes	LGA Supervisor	SA	SA	D	A	SA	A	A	SA	SA	D	A	A	SD	D	D	D	A	A	SD	D	D	N	N	D	D	SD	A
2024-05-19 08:16:38	36-45	Female	FSLC	NE	Adamawa	Madagali	Wagga	Yes	APC	6-10 yrs	No				No		No		No		SA	SA	SD	A	SA	N	A	SA	SA	SD	A	A	SD	D	SD	D	A	A	SD	D	D	N	N	D	D	D	A
2024-05-19 08:24:05	26-35	Female	FSLC	NE	Adamawa	Mayo Belwa	Gorobi	Yes	PDP	6-10 yrs	Yes	APC	Imposition of Candidates, Hijack of Party Structure		No		No		No		SA	SA	SD	A	SA	N	A	SA	SA	D	A	A	SD	SD	SD	SD	SA	A	SD	SD	SA	A	A	N	N	D	A
2024-05-19 08:29:55	46-55	Female	WAEC/NECO	NE	Adamawa	Jada	Mbulo	Yes	APC	1-5 yrs	No				No		No		No		SA	SA	D	A	SA	N	A	SA	SA	D	A	A	SD	D	D	D	SA	A	SD	D	N	N	N	D	N	D	A
2024-05-19 08:37:45	56-65	Male	WAEC/NECO	NE	Adamawa	Hong	Goya	Yes	PDP	11-15 yrs	No				No		No		Yes	Adviser/Assistant	SA	SA	D	A	SA	A	A	SA	SA	D	A	A	SD	SD	SD	D	A	A	SD	SD	SA	A	A	A	N	SD	A
2024-05-19 10:44:48	36-45	Female	WAEC/NECO	NE	Adamawa	Guyuk	Dumna	Yes	APC	6-10 yrs	No				No		No		No		SA	SA	D	A	SA	N	A	SA	SA	SD	A	A	D	D	SD	SD	SA	A	SD	D	D	N	N	D	N	D	A
2024-05-19 10:49:27	26-35	Male	WAEC/NECO	NE	Adamawa	Ganye	Gamu	Yes	APC	1-5 yrs	No				No		No		No		SA	A	D	A	SA	N	A	SA	SA	D	A	A	SD	SD	SD	SD	SA	A	SD	D	D	N	N	D	N	D	A
2024-05-19 10:53:34	46-55	Female	FSLC	NE	Adamawa	Larmude	Waduku	Yes	APC	6-10 yrs	No				No		No		No		SA	SA	SD	A	SA	N	A	SA	SA	SD	A	SA	D	D	D	D	A	A	D	D	N	N	N	D	D	SD	A
2024-05-19 10:58:13	18-25	Female	FSLC	NE	Adamawa	Yola South	Yolde Kohi	Yes	PDP	1-5 yrs	No				No		No		No		SA	SA	SD	A	SA	N	A	A	SA	D	A	A	N	D	D	D	SA	A	D	SD	A	A	N	A	N	N	A
2024-05-19 11:03:11	36-45	Female	WAEC/NECO	NE	Adamawa	Numan	Bolki	Yes	PDP	6-10 yrs	No				No		Yes	Ward Councilor	No		SA	A	D	A	SA	N	A	SA	SA	D	A	A	D	D	D	D	SA	A	D	SD	SA	A	A	A	N	D	A
2024-05-19 11:10:20	46-55	Female	WAEC/NECO	NE	Adamawa	Toungo	Toungo 111	Yes	PDP	11-15 yrs	No				No		No		Yes	Boards	SA	SA	N	A	SA	N	A	A	SA	D	A	A	D	D	D	D	A	A	D	D	A	A	A	A	N	D	A
2024-05-19 11:17:04	26-35	Female	FSLC	NE	Adamawa	Yola North	Nassarawo	Yes	APC	1-5 yrs	No				No		No		No		SA	SA	SD	A	SA	N	A	SA	SA	SD	A	SA	D	D	D	D	SA	A	D	SD	N	N	N	D	N	D	A
2024-05-19 11:53:12	36-45	Female	NCE/ND/TCII	NC	Nasarawa	Obi	Aududu	Yes	APC	6-10 yrs	Yes	PDP	Non Inclusion in Decision-making, Imposition of Candidates, Hijack of Party Structure		Yes	State Executive	No		Yes	Boards	SA	A	D	A	SA	A	A	SA	SA	SD	A	SA	N	D	SD	D	A	A	SD	D	D	A	A	D	N	D	A
2024-05-19 11:57:13	46-55	Male	HND/BSC/(FIRST DEGREE)	NC	Nasarawa	Toto	Katakpa	Yes	APC	6-10 yrs	No				Yes	State Executive	No		No		SA	A	D	A	SA	A	A	SA	SA	SD	A	SA	N	D	D	D	A	A	D	D	D	A	A	D	N	D	A
2024-05-19 12:02:16	18-25	Female	WAEC/NECO	NC	Nasarawa	Kokona	Garuku	Yes	APC	1-5 yrs	No				Yes	Ward Executive	No		No		SA	A	D	A	SA	N	A	A	SA	SD	A	A	SD	D	D	D	A	A	D	D	N	N	N	N	N	D	A
2024-05-19 12:07:06	26-35	Female	WAEC/NECO	NC	Nasarawa	Karu	Karshi 11	Yes	APC	1-5 yrs	No				Yes	Ward Executive	No		No		SA	A	D	A	SA	N	A	SA	SA	SD	A	A	N	D	D	D	A	A	D	D	N	N	N	N	D	D	A
2024-05-19 12:12:48	26-35	Female	FSLC	NC	Nasarawa	Lafia	Zanwa	Yes	APC	1-5 yrs	Yes	PDP	Imposition of Candidates		No		No		No		SA	A	D	A	SA	N	A	A	SA	SD	A	A	D	D	D	D	A	A	D	D	N	N	N	N	D	D	A
2024-05-19 12:17:08	36-45	Female	WAEC/NECO	NC	Nasarawa	Lafia	Chiroma	Yes	APC	1-5 yrs	No				No		No		No		SA	A	SD	A	SA	N	A	SA	SA	SD	A	A	D	D	D	D	A	A	D	SD	D	N	N	D	D	SD	A
2024-05-19 12:24:17	66 and above	Male	WAEC/NECO	NC	Nasarawa	Akwanga	Akwanga west	Yes	APC	1-5 yrs	Yes	PDP	Imposition of Candidates		No		No		No		SA	A	D	A	SA	N	A	SA	SA	D	A	SA	D	D	SD	D	SA	A	SD	D	N	N	N	D	D	SD	A
2024-05-19 12:29:49	36-45	Female	NCE/ND/TCII	NC	Nasarawa	Karu	Guruku	Yes	APC	6-10 yrs	No				Yes	State Executive	No		Yes	Adviser/Assistant	SA	SA	SD	A	SA	A	A	SA	SA	D	A	A	D	D	D	D	A	A	D	D	D	A	A	N	N	D	A
2024-05-19 12:34:29	36-45	Female	WAEC/NECO	NC	Nasarawa	Akwanga	Gudi	Yes	APC	1-5 yrs	No				No		No		No		SA	SA	D	A	SA	N	A	SA	SA	D	A	A	SD	D	D	D	A	A	D	SD	D	N	N	D	D	D	A
2024-05-19 12:39:55	46-55	Male	WAEC/NECO	NC	Nasarawa	Keffi	Angwan Iya 11	Yes	APC	1-5 yrs	No				No		No		No		SA	A	SD	A	SA	N	A	A	SA	SD	A	A	D	D	SD	D	SA	A	D	SD	D	N	N	D	N	SD	A
2024-05-19 15:42:43	36-45	Female	NCE/ND/TCII	SW	Delta	Sapele	Sapele Urban 111	Yes	PDP	6-10 yrs	No				Yes	LG Executive	Yes	Ward Councilor	Yes	Boards	SA	SA	D	A	SA	N	A	SA	SA	D	A	A	D	D	D	D	A	A	D	D	A	N	N	A	N	D	A
2024-05-19 15:52:36	46-55	Female	NCE/ND/TCII	SS	Delta	Ughelli South	Jeremi 11	Yes	PDP	6-10 yrs	Yes	APC	Imposition of Candidates, Hijack of Party Structure		Yes	LG Executive	No		No		SA	SA	D	A	SA	A	A	A	SA	D	A	A	N	D	SD	D	A	A	D	D	SA	A	A	A	N	N	A
2024-05-20 23:49:22	46-55	Female	HND/BSC/(FIRST DEGREE)	SS	Delta	Ethiope East	Agbona 11	Yes	PDP	6-10 yrs	Yes	APC	Imposition of Candidates, Hijack of Party Structure		Yes	LG Executive	No		No		SA	A	D	A	SA	A	A	A	SA	D	A	A	N	D	D	D	A	A	D	D	SA	N	N	A	N	SD	A
2024-05-21 08:51:42	26-35	Female	NCE/ND/TCII	SS	Delta	Ika North East	Umunede	Yes	PDP	6-10 yrs	Yes	APC	Imposition of Candidates		Yes	Ward Executive	No		No		SA	A	D	A	SA	N	A	SA	SA	D	A	A	SD	D	D	D	A	A	D	D	A	N	N	A	N	D	A
2024-05-21 08:59:45	18-25	Male	WAEC/NECO	SS	Delta	Ika North East	Akumazi	Yes	PDP	1-5 yrs	No				Yes	Ward Executive	No		No		SA	A	SD	A	SA	N	A	SA	SA	D	A	A	D	D	SD	D	A	A	D	D	A	N	N	A	N	D	A
2024-05-21 09:18:18	36-45	Male	HND/BSC/(FIRST DEGREE)	SS	Delta	Ethiope West	Jesse 111	Yes	PDP	6-10 yrs	No				Yes	Ward Executive	No		No		SA	A	SD	A	SA	N	A	SA	SA	D	A	A	D	D	SD	SD	A	A	D	D	SA	A	A	A	N	D	N
2024-05-21 09:29:43	66 and above	Female	POSTGRADUATE	SS	Delta	Aniocha North	Onicha Ugbo	Yes	APC	6-10 yrs	Yes	PDP	Imposition of Candidates		Yes	LG Executive	No		Yes	Boards	SA	A	N	A	SA	A	A	SA	SA	SD	A	A	N	D	SD	D	A	A	D	D	D	A	A	N	N	N	N
2024-05-21 09:40:32	26-35	Female	NCE/ND/TCII	SS	Delta	Bomadi	Kpakiama	Yes	APC	1-5 yrs	No				No		No		No		SA	A	D	A	SA	N	A	SA	SA	D	A	A	D	D	SD	D	A	A	D	D	N	N	N	N	D	N	A
2024-05-21 09:48:30	36-45	Male	WAEC/NECO	SS	Delta	Ethiope East	Agbona V111	Yes	APC	6-10 yrs	No				Yes	LG Executive	No		No		SA	SA	N	A	SA	N	A	A	SA	D	A	A	N	D	D	D	A	A	D	D	N	N	N	D	D	N	A
2024-05-21 09:58:52	26-35	Female	WAEC/NECO	SS	Delta	Patani	Abbari	Yes	APC	6-10 yrs	Yes	PDP	Imposition of Candidates		Yes	Ward Executive	No		No		SA	A	D	A	SA	D	A	SA	SA	D	A	A	N	D	D	D	A	A	D	D	N	N	N	N	N	D	A
2024-05-21 10:14:16	26-35	Female	WAEC/NECO	SS	Delta	Okpe	Orerokpe	Yes	PDP	6-10 yrs	No				No		No		Yes	Adviser/Assistant	SA	A	N	A	SA	D	N	A	A	D	A	A	N	D	D	D	A	A	D	D	A	N	N	A	N	N	A
2024-05-21 10:26:05	36-45	Female	HND/BSC/(FIRST DEGREE)	SS	Delta	Ughelli South	Ewu 11	Yes	APC	1-5 yrs	No				No		No		No		SA	A	D	A	SA	D	A	A	SA	D	A	A	D	D	D	D	A	A	D	D	N	N	N	N	N	D	A
2024-05-21 10:37:19	18-25	Male	WAEC/NECO	SS	Delta	Patani	Patani 111	Yes	PDP	6-10 yrs	No				No		Yes	Ward Councilor	Yes	Adviser/Assistant	SA	SA	D	A	SA	A	A	SA	SA	D	A	A	D	D	D	D	A	A	D	D	A	N	N	A	N	D	A
2024-05-21 10:58:54	46-55	Male	POSTGRADUATE	SS	Delta	Uvwie	Effurun 11	Yes	PDP	6-10 yrs	No				No		No		Yes	LGC Supervisor	SA	A			SA	N	A	SA	SA	D	A	A	D	D	D	D	A	A	D	D	A	A	A	A	N		A
2024-05-21 11:03:49	36-45	Female	HND/BSC/(FIRST DEGREE)	SS	Delta	Oshimili North	Ibusa 111	Yes	APC	1-5 yrs	No				No		No		No		SA	SA	D	A	SA	D	N	A	A	D	A	A	D	D	D	D	A	A	D	D	N	N	N	D	D	N	A
2024-05-21 11:21:08	36-45	Male	HND/BSC/(FIRST DEGREE)	SS	Delta	Udu	Udu 111	Yes	PDP	6-10 yrs	No				No		No		Yes	Boards	SA	A	D	A	SA	A	A	SA	SA	D	A	A	D	D	D	D	A	A	D	D	A	A	N	A	N	N	A
2024-05-21 11:30:18	26-35	Female	WAEC/NECO	SS	Delta	Ndokwa West	Abbi 11	Yes	APC	1-5 yrs	No				No		No		No		SA	A	D	A	SA	D	A	SA	SA	D	A	A	D	D	D	D	A	A	D	D	D	N	N	D	N	N	A
2024-05-21 11:43:35	46-55	Female	HND/BSC/(FIRST DEGREE)	SS	Delta	Oshimili North	Illah	Yes	PDP	11-15 yrs	Yes	APC	Imposition of Candidates, Hijack of Party Structure		No		No		Yes	Cabinet/Exco	SA	SA	D	A	SA	A	A	SA	SA	D	A	A	D	D	D	D	A	A	D	D	A	A	A	A	N	D	A
2024-05-22 21:26:35	36-45	Male	NCE/ND/TCII	SS	Delta	Warri South West	Orere	Yes	PDP	6-10 yrs	No				No		No		Yes	Adviser/Assistant	SA	A	D	A	SA	N	A	A	SA	D	A	A	N	D	D	D	A	A	D	D	A	A	A	A	N	D	A
2024-05-22 21:51:03	26-35	Female	WAEC/NECO	SS	Delta	Oshimili South	Umuezie	Yes	PDP	6-10 yrs	Yes	APC	Imposition of Candidates		No		No		No		SA	SA	D	A	SA	N	A	SA	SA	D	A	A	D	D	SD	D	A	A	D	D	A	N	N	A	N	D	A
2024-05-22 21:55:35	56-65	Female	HND/BSC/(FIRST DEGREE)	SS	Delta	Ukwuani	Obiaruku 1	Yes	APC	6-10 yrs	Yes	PDP	Hijack of Party Structure		No		Yes	Ward Councilor	Yes	Adviser/Assistant	SA	SA	D	A	SA	N	A	A	SA	D	A	A	SD	D	SD	D	A	A	D	D	N	N	N	D	D	D	A
2024-05-22 22:00:33	66 and above	Male	HND/BSC/(FIRST DEGREE)	SS	Delta	Ughelli North	Ughelli 1	Yes	APC	1-5 yrs	Yes	PDP	Imposition of Candidates		No		No		Yes	Boards	SA	SA	D	A	SA	A	A	A	SA	D	A	A	SD	D	SD	D	A	A	D	D	N	N	N	D	D	D	A
2024-05-22 22:06:20	46-55	Male	WAEC/NECO	SS	Delta	Isoko North	Ozoro 111	Yes	APC	1-5 yrs	No				No		No		No		SA	A	D	A	SA	N	A	SA	SA	D	A	A	SD	D	SD	D	A	A	D	D	D	N	N	D	D	D	A
2024-05-22 22:11:00	18-25	Male	WAEC/NECO	SS	Delta	Ndokwa East	Olomoro	Yes	PDP	11-15 yrs	No				No		No		Yes	Boards	SA	SA	SD	A	SA	N	A	A	SA	D	A	A	N	D	SD	D	A	A	D	D	A	N	A	A	N	D	A
2024-05-22 22:41:02	56-65	Male	HND/BSC/(FIRST DEGREE)	NC	Nasarawa	Doma	Galadima	Yes	PDP	16+ yrs					No		Yes	Senator			SA	SA	N	A	SA	A	A	SA	SA	N	A	N	N	N	N	N	D	A	N	N	SA	A	A	A	A	N	A
2024-05-22 22:49:03	56-65	Male	HND/BSC/(FIRST DEGREE)	NC	Nasarawa	Akwanga	Kwaje Kwanje	Yes	PDP	11-15 yrs	No				No		Yes	Senator	No		SA	SA	A	A	SA	SA	A	SA	SA	N	N	N	D	N	N	N	D	A	N	N	SA	SA	SA	A	A	A	A
2024-05-29 15:10:39	36-45	Male	HND/BSC/(FIRST DEGREE)	NC	Nasarawa	Obi	Obi	Yes	PDP	11-15 yrs	No				No		Yes	State Assembly	Yes	Boards	SA	A	N	A	SA	SA	SA	SA	SA	N	A	N	N	D	N	N	D	A	N	N	SA	A	SA	SA	N	N	N
2024-05-29 16:09:54	46-55	Male	HND/BSC/(FIRST DEGREE)	NC	Nasarawa	Keana	Iwagu	Yes	PDP	11-15 yrs	No				Yes	State Executive	Yes	MFR	Yes	Adviser/Assistant	SA	A	A	A	SA	SA	A	SA	SA	N	A	N	D	A	N	A	D	A	N	N	SA	SA	SA	SA	A	A	A
2024-05-29 16:23:22	36-45	Male	HND/BSC/(FIRST DEGREE)	NC	Nasarawa	Wamba	Wamba East	Yes	PDP	6-10 yrs	No				No		Yes	MFR	No		SA	SA	A	A	SA	SA	A	SA	A	N	A	N	N	N	N	N	D	A	N	A	SA	SA	SA	SA	A	N	A
2024-05-30 16:50:37	26-35	Female	NCE/ND/TCII	SE	Imo	Owerri Municipal	Ikenegbu 11	Yes	APC	1-5 yrs	No				No		No		No		SA	A	D	A	SA	D	A	A	A	D	A	A	SD	D	D	D	A	A	SD	D	N	N	N	D	D	D	N
2024-05-30 16:59:30	36-45	Male	HND/BSC/(FIRST DEGREE)	SE	Imo	Orsu	Amaruru	Yes	APC	6-10 yrs	Yes	PDP	Factionalization		No		Yes	Ward Councilor	Yes	Adviser/Assistant	SA	A	N	A	SA	D	A	SA	SA	SD	A	A	D	D	SD	D	A	A	D	D	D	A	A	D	D	D	A
2024-05-30 17:08:37	46-55	Female	HND/BSC/(FIRST DEGREE)	SE	Imo	Orlu	Amaifeke	Yes	APC	6-10 yrs	Yes	PDP	Imposition of Candidates		No		Yes	State Assembly	Yes	Adviser/Assistant	SA	A	N	A	SA	A	A	SA	SA	D	A	A	D	D	SD	D	A	A	D	D	N	A	N	N	D	D	A
2024-05-30 17:21:00	36-45	Male	HND/BSC/(FIRST DEGREE)	SE	Imo	Aboh Mbaise	Mbutu	Yes	APC	6-10 yrs	No				Yes	LG Executive			Yes	Boards	SA	A	D	A	SA	N	A	A	SA	D	A	A	D	D	D	D	A	A	D	SD	N	A	A	N	N	N	A
2024-05-30 17:27:41	36-45	Female	NCE/ND/TCII	SE	Imo	Ehime Mbano	Umueze 11	Yes	APC	6-10 yrs	No				No		No		Yes	Adviser/Assistant	SA	A	D	A	SA	N	A	A	A	SD	A	A	SD	D	SD	D	A	A	D	D	N	N	N	N	D	N	N
2024-05-30 19:45:48	36-45	Female	HND/BSC/(FIRST DEGREE)	SE	Imo	Ahiazu Mbaise	Umunumo 11	Yes	PDP	11-15 yrs	No				Yes	State Executive	Yes	Ward Councilor	Yes	Adviser/Assistant	SA	A	D	A	SA	A	A	A	SA	D	A	A	D	D	SD	D	A	A	SD	SD	A	A	A	A	N	N	A
2024-05-30 19:51:18	26-35	Female	NCE/ND/TCII	SE	Imo	Ideato South	Ntueke	Yes	PDP	6-10 yrs	No				No		No		No		SA	SA	D	A	SA	D	A	A	SA	SD	A	A	SD	D	SD	D	A	A	D	SD	A	N	N	A	N	D	A
2024-05-30 20:00:02	66 and above	Male	NCE/ND/TCII	SE	Imo	Ihitte/Uboma	Amakohia	Yes	PDP	11-15 yrs	No				No		Yes	Ward Councilor	Yes	Boards	SA	SA	SD	A	SA	N	A	A	SA	D	A	A	D	D	SD	D	A	A	SD	SD	A	A	N	A	N	SD	A
2024-05-30 20:06:02	18-25	Male	HND/BSC/(FIRST DEGREE)	SE	Imo	Ikeduru	Iho	Yes	APC	1-5 yrs	No				No		No		No		SA	SA	D	A	SA	D	A	A	SA	SD	A	A	SD	D	D	D	A	A	SD	D	N	N	N	N	N	D	A
2024-05-30 20:13:02	36-45	Female	HND/BSC/(FIRST DEGREE)	SE	Imo	Isu	Isu Njaba 111	Yes	PDP	6-10 yrs	No				Yes	LG Executive	No		Yes	Adviser/Assistant	SA	SA	D	A	SA	N	A	A	SA	SD	A	A	D	D	D	D	A	A	D	D	A	N	N	A	N	D	A
2024-05-30 20:23:30	46-55	Male	HND/BSC/(FIRST DEGREE)	SE	Imo	Ngor Okpalla	Ozuzu	Yes	PDP	11-15 yrs	No				No		Yes	Ward Councilor	Yes	Cabinet/Exco	SA	SA	D	A	SA	N	A	SA	SA	D	A	A	D	D	SD	D	A	A	SD	SD	SA	A	A	A	N	D	A
2024-05-30 20:34:18	46-55	Female	NCE/ND/TCII	SE	Imo	Nkwerre	Omaopara	Yes	APC	1-5 yrs	Yes	PDP	Factionalization, Hijack of Party Structure		No		No		Yes	Boards	SA	A	D	A	SA	N	A	A	SA	D	A	A	SD	D	D	D	A	A	D	D	N	N	N	N	D	D	A
2024-05-30 20:39:12	26-35	Female	HND/BSC/(FIRST DEGREE)	SE	Imo	Nwangele	Umuozu	Yes	APC	1-5 yrs	No				No		No		No		SA	A	SD	A	SA	D	N	A	SA	SD	N	A	SD	D	SD	D	A	A	SD	SD	N	N	N	N	D	D	A
2024-05-30 20:47:56	36-45	Female	HND/BSC/(FIRST DEGREE)	SE	Imo	Njaba	Atta 11	Yes	PDP	1-5 yrs	Yes	APC	Factionalization, Non Inclusion in Decision-making, Imposition of Candidates, Hijack of Party Structure		No		No		Yes	Boards	SA	SA	D	A	SA	N	A	A	SA	SD	A	A	SD	D	SD	D	A	A	D	SD	A	A	A	A	N	D	A
2024-05-30 21:03:02	56-65	Male	POSTGRADUATE	SE	Imo	Obowo	Avutu	Yes	PDP	6-10 yrs	Yes	APC	Factionalization, Imposition of Candidates		No		No		No		SA	A	D	A	SA	N	A	A	SA	SD	A	A	D	D	SD	D	A	A	SD	SD	A	A	N	A	N	D	A
2024-05-30 21:11:51	26-35	Female	HND/BSC/(FIRST DEGREE)	SE	Imo	Ohaji/Egbema	Egbema A	Yes	PDP	1-5 yrs	No				No		No		No		SA	SA	D	A	SA	N	N	A	SA	D	A	A	D	D	SD	D	A	D	SD	SD	A	N	N	A	N	D	A
2024-05-30 21:41:44	36-45	Female	HND/BSC/(FIRST DEGREE)	SE	Imo	Onuimo	Eziama	Yes	APC	6-10 yrs	No				Yes	LG Executive	No		Yes	Boards	SA	A	D	A	SA	N	A	A	SA	D	A	A	D	D	SD	D	A	A	SD	SD	N	N	N	D	D	D	A
2024-05-30 21:58:21	26-35	Female	HND/BSC/(FIRST DEGREE)	SE	Imo	Okigwe	Ihube	Yes	APC	6-10 yrs	No				No		No		Yes	Boards	SA	SA	D	A	SA	N	A	SA	SA	D	A	A	D	D	SD	D	A	A	D	SD	N	N	N	D	D	N	A
2024-05-30 22:08:57	46-55	Female	HND/BSC/(FIRST DEGREE)	SE	Imo	Oguta	Awa	Yes	APC	1-5 yrs	No				Yes	State Executive	No	President	No		SA	SA	D	A	SA	A	A	SA	SA	D	A	A	D	D	D	D	A	A	D	SD	N	N	N	D	D	D	A
2024-05-30 22:19:53	36-45	Female	HND/BSC/(FIRST DEGREE)	SE	Imo	Oru East	Amiri	Yes	APC	6-10 yrs	No				Yes	State Executive	No		Yes	Boards	SA	A	D	A	SA	A	A	SA	SA	D	SA	A	D	D	SD	D	A	A	D	SD	N	A	A	N	D	D	A
2024-05-30 23:12:12	18-25	Female	NCE/ND/TCII	SE	Imo	Oru West	Ozara	Yes	APC	1-5 yrs	No				Yes	Ward Executive	No		No		SA	A	SD	A	SA	N	A	A	SA	SD	A	SA	SD	SD	SD	SD	SA	A	SD	SD	N	N	N	N	D	SD	A
2024-05-30 23:17:51	26-35	Female	WAEC/NECO	SE	Imo	Owerri North	Egbu	Yes	APC	1-5 yrs	No				Yes	Ward Executive	No		No		SA	SA	SD	A	SA	D	A	A	SA	SD	A	A	SD	D	D	D	A	A	SD	SD	N	N	N	D	D	SD	SA
2024-05-30 23:26:12	36-45	Male	HND/BSC/(FIRST DEGREE)	SE	Imo	Owerri West	Nekede	Yes	APC	6-10 yrs	No				Yes	State Executive	No		Yes	Boards	SA	SA	D	A	SA	A	A	SA	SA	SD	A	A	D	D	SD	D	A	A	D	SD	N	A	A	N	N	D	A
2024-05-30 23:35:00	46-55	Male	HND/BSC/(FIRST DEGREE)	SE	Imo	Oguta	Izombe	Yes	APC	6-10 yrs	Yes	PDP	Factionalization		Yes	LG Executive	Yes	Ward Councilor	No		SA	A	D	A	SA	N	A	A	SA	D	A	A	D	D	D	D	A	D	SD	SD	N	N	N	N	D	D	A
2024-05-30 23:43:19	26-35	Female	NCE/ND/TCII	SE	Imo	Ideato North	Isiokpa	Yes	APC	1-5 yrs	No				Yes	LG Executive	No		No		SA	SA	D	A	SA	N	A	A	SA	SD	A	A	D	D	SD	D	A	A	SD	SD	N	A	N	D	D	D	A
2024-05-31 06:00:00	36-45	Female	HND/BSC/(FIRST DEGREE)	SE	Imo	Ahiazu Mbaise	Obohia Ekwerazu	Yes	APC	6-10 yrs	No				Yes	Ward Executive	No		No		SA	A	SD	A	SA	N	A	A	SA	SD	A	A	SD	SD	SD	SD	A	A	D	SD	D	N	N	D	D	D	A
2024-05-31 06:05:30	26-35	Female	NCE/ND/TCII	SE	Imo	Ezinihitte Mbaise	Onicha 1	Yes	APC	1-5 yrs	No				Yes	Ward Executive	No		No		SA	SA	D	A	SA	D	A	A	SA	SD	A	A	SD	SD	SD	SD	A	A	SD	SD	N	N	N	D	D	SD	A
2024-05-31 06:11:40	26-35	Female	HND/BSC/(FIRST DEGREE)	SE	Imo	Ehime Mbano	Nzerem Ikpe	Yes	PDP	1-5 yrs	No				Yes	Ward Executive	No		No		SA	SA	D	A	SA	D	A	A	SA	D	A	A	SD	SD	SD	SD	A	A	D	SD	A	N	N	A	N	D	A
2024-05-31 06:16:58	36-45	Male	HND/BSC/(FIRST DEGREE)	SE	Imo	Ideato South	Dikenafai	Yes	APC	1-5 yrs	Yes	PDP	Factionalization, Hijack of Party Structure		Yes	LG Executive	No		No		SA	A	D	A	SA	N	A	A	SA	D	A	A	SD	D	D	D	A	D	D	SD	N	N	N	D	D	D	A
2024-05-31 06:23:15	36-45	Male	HND/BSC/(FIRST DEGREE)	SE	Imo	Ihitte/Uboma	Okata	Yes	APC	6-10 yrs	No				Yes	State Executive	No		Yes	Boards	SA	SA	D	A	SA	N	A	SA	SA	D	A	A	N	N	D	N	A	A	D	SD	N	A	A	D	N	D	A
2024-05-31 06:30:10	26-35	Female	NCE/ND/TCII	SE	Imo	Ngor Okpala	Eziama/Okpala	Yes	APC	1-5 yrs	No				No		No		Yes	Boards	SA	A	D	A	SA	D	A	A	SA	D	A	A	SD	SD	SD	SD	A	A	D	SD	SD	N	N	D	D	D	A
2024-05-31 06:36:45	46-55	Female	HND/BSC/(FIRST DEGREE)	SE	Imo	Obowo	Umunachi	Yes	APC	6-10 yrs	No				No		No		No		SA	A	D	A	SA	D	A	A	SA	D	A	A	D	SD	SD	SD	A	A	D	SD	N	N	N	D	D	D	A
2024-05-31 08:44:53	36-45	Female	HND/BSC/(FIRST DEGREE)	SE	Imo	Ideato North	Izuogu	Yes	PDP	11-15 yrs	No				Yes	State Executive	No		Yes	Adviser/Assistant	SA	SA	N	A	SA	A	A	SA	SA	D	A	A	N	D	SD	D	A	A	D	SD	SA	A	A	SA	N	N	A
2024-05-31 08:53:37	46-55	Female	HND/BSC/(FIRST DEGREE)	SE	Imo	Ikeduru	Amaimo	Yes	PDP	6-10 yrs	Yes	APC	Factionalization, Imposition of Candidates, Hijack of Party Structure		Yes	State Executive	No	State Assembly	No		SA	SA	D	A	SA	A	A	SA	SA	D	A	A	N	D	SD	D	A	A	D	SD	SA	A	A	A	N	D	A
2024-05-31 09:02:03	18-25	Female	NCE/ND/TCII	SE	Imo	Isiala Mbano	Ogbor	Yes	PDP	1-5 yrs	No				Yes	Ward Executive	No		No		SA	A	D	A	SA	D	A	A	SA	D	A	A	SD	SD	SD	SD	A	A	D	SD	SA	N	N	A	N	D	A
2024-05-31 09:08:20	46-55	Male	POSTGRADUATE	SE	Imo	Mbaitolu	Ogbaku	Yes	PDP	11-15 yrs	No				Yes	State Executive	Yes	Ward Councilor	Yes	Boards	SA	SA	N	A	SA	A	A	SA	SA	D	A	A	N	D	SD	D	A	A	SD	SD	SA	A	A	A	N	N	A
2024-05-31 09:15:09	26-35	Female	NCE/ND/TCII	SE	Imo	Nkwerre	Owerre Nkworji	Yes	PDP	6-10 yrs	No				Yes	LG Executive	Yes	Ward Councilor	No		SA	A	D	A	SA	N	A	SA	SA	D	A	A	D	SD	SD	SD	A	A	D	SD	A	N	N	A	N	D	A
2024-05-31 09:29:46	36-45	Female	NCE/ND/TCII	SE	Imo	Oru West	Amagu	Yes	PDP	6-10 yrs	No				Yes	Ward Executive	No		No		SA	SA	D	A	SA	D	A	A	SA	SD	A	A	SD	SD	SD	SD	SA	A	D	SD	A	N	N	A	N	D	A
2024-05-31 09:35:19	56-65	Male	POSTGRADUATE	SE	Imo	Owerri West	Obinze	Yes	PDP	6-10 yrs	No				Yes	LG Executive	No		No		SA	A	D	A	SA	N	A	SA	SA	SD	A	A	D	D	SD	D	A	A	D	SD	SA	N	N	A	N	N	A
2024-05-31 14:07:45	66 and above	Male	HND/BSC/(FIRST DEGREE)	SE	Imo	Aboh Mbaise	Ibeku	Yes	PDP	16+ yrs	No				No		Yes	Ward Councilor	Yes	Cabinet/Exco	SA	SA	N	A	SA	A	A	SA	SA	D	A	A	SD	D	SD	D	A	A	D	SD	SA	SA	SA	A	N	N	A
2024-05-31 14:20:36	18-25	Female	NCE/ND/TCII	SE	Imo	Ezinihitte Mbaise	Eziudo	Yes	PDP	1-5 yrs	No				Yes	Ward Executive	No		No		SA	A	N	A	SA	D	A	A	SA	D	A	A	SD	SD	SD	SD	A	A	D	SD	A	N	N	A	N	D	A
2024-05-31 14:35:23	26-35	Female	NCE/ND/TCII	SE	Imo	Nwangele	Umuozu	Yes	PDP	6-10 yrs	Yes	APC	Factionalization, Hijack of Party Structure		Yes	LG Executive	No		Yes	LGA Supervisor	SA	SA	D	A	SA	N	A	SA	SA	D	A	A	D	D	SD	D	A	A	D	SD	A	N	N	A	N	D	A
2024-05-31 14:43:31	26-35	Female	HND/BSC/(FIRST DEGREE)	SE	Imo	Ahiazu Mbaise	Mpam	Yes	PDP	6-10 yrs	Yes	APC	Factionalization, Hijack of Party Structure		Yes	Ward Executive	No		No		SA	A	D	N	A	D	N	A	A	D	A	A	D	D	D	D	A	D	SD	D	A	N	N	A	N	N	A
2024-06-03 00:26:21	46-55	Female	WAEC/NECO	SE	Imo	Okigwe	Aguobu	Yes	PDP	11-15 yrs	No				No		No		Yes	Adviser/Assistant	SA	SA	N	A	A	N	A	A	A	D	A	A	N	D	SD	D	A	A	D	D	A	N	N	A	N	N	A
2024-06-03 00:32:50	26-35	Female	NCE/ND/TCII	SE	Imo	Onuimo	Okwelle 11	Yes	PDP	1-5 yrs	Yes	APC	Factionalization, Hijack of Party Structure		No		No		No		SA	SA	N	A	A	N	A	SA	A	D	N	N	D	D	SD	D	A	A	SD	D	A	N	N	A	N	N	A
2024-06-03 00:40:47	18-25	Male	WAEC/NECO	SE	Imo	Oguta	Obidi/Aro	Yes	PDP	1-5 yrs	No				No		No		No		SA	A	N	A	SA	D	A	SA	A	N	N	A	N	D	SD	D	A	A	D	D	A	D	D	A	N	N	A
2024-06-03 01:57:24	36-45	Female	HND/BSC/(FIRST DEGREE)	SW	Lagos	Surulere	Aguda	Yes	APC	6-10 yrs	No				Yes	State Executive	No		Yes	Boards	SA	A	N	A	SA	A	A	A	SA	N	A	N	N	N	D	D	A	A	D	D	N	A	A	N	N	N	A
2024-06-03 02:05:29	46-55	Male	HND/BSC/(FIRST DEGREE)	SW	Lagos	Amuwo Odofin	Ibeshe	Yes	APC	6-10 yrs	No				No		No		Yes	Cabinet/Exco	SA	SA	N	A	A	A	A	A	A	N	A	A	N	D	D	D	N	A	D	N	N	A	A	N	N	N	A
2024-06-03 02:20:14	36-45	Female	HND/BSC/(FIRST DEGREE)	SW	Lagos	Eti-Osa	Obalende	Yes	APC	6-10 yrs	No				No		No		No		SA	SA	N	A	A	N	A	SA	A	N	N	N	D	D	D	N	A	A	D	D	N	A	N	N	N	N	A
2024-06-03 02:59:23	36-45	Female	HND/BSC/(FIRST DEGREE)	SW	Lagos	Ikeja	Onigbongbon	Yes	APC	6-10 yrs	No				Yes	State Executive	No		Yes	Cabinet/Exco	SA	SA	N	A	A	A	A	A	A	D	A	A	N	D	D	D	A	A	D	N	N	A	A	N	N	N	A
2024-06-03 03:09:57	56-65	Male	HND/BSC/(FIRST DEGREE)	SW	Lagos	Somolu	Onipanu	Yes	APC	6-10 yrs	No				Yes	State Executive	No		Yes	Cabinet/Exco	SA	SA	N	A	A	A	A	SA	A	D	A	A	N	N	N	N	A	A	D	D	N	A	A	N	N	N	A
2024-06-03 03:39:57	66 and above	Male	HND/BSC/(FIRST DEGREE)	SW	Lagos	Oshodi/Isolo	Okota	Yes	APC	6-10 yrs	Yes	PDP	Factionalization		Yes	State Executive	Yes	Ward Councilor	Yes	Boards	SA	SA	N	A	A	A	A	SA	A	D	A	A	N	D	D	D	A	A	N	D	N	A	A	N	N	N	A
2024-06-03 07:22:21	26-35	Female	HND/BSC/(FIRST DEGREE)	SW	Lagos	Agege	Orile Agege/Oko Oba	Yes	APC	1-5 yrs	No				Yes	LG Executive	No		No		SA	A	D	A	A	N	A	A	A	D	A	A	D	D	D	D	A	A	D	D	N	N	N	D	D	D	A
